# Supplementary material for: MicroRNA Expression Profiling of Lactating Mammary Gland in Divergent Phenotype Swine Breeds
Source: MDPI journal article supplement (doi:10.3390/ijms16011448), 2015-01-08
Supplement: s1 [file s1]

## Sheet: data analysis flowchart
Figure S1. Data analysis flowchart of the study.

## Sheet: Differentially expressed miRNA
Table S1. Summary of differentially miRNA in this study.
Pre-miRNA Index	miRNA_Index	miR_name	miR_seq	len	genomeID	strand	start	end	genome_seq	#mir	mirIDs,	rep_mirID	rep_mirSeq	rep_miRID	rep_miRSeq	type	Sequence in miRbase	group	SS	hairpinLen	CG%	dG	MFEI	RX_J(raw)	RX_Y(raw)	RX_J(norm)	RX_Y(norm)	Expression level	chis_quare	fisher_exact_test
1	1	ssc-mir-4339-p3_1ss22GT	AGAGGAGCCGCGACAGAGCCGT	22	333778766	+	3828	3902	ctgtgctccggctctgagcgcccctcctcgtccgtcccctccagctggAGAGGAGCCGCGACAGAGCCGGagcag	1	ssc-mir-4339,	ssc-mir-4339	ctgtgctccgGCTCTGAGCTGCCCCTCCTCGTCCgtcccctccagctggagaggagccgcgacagagccggagcagtggc	ssc-mir-4339-p3	agaggagccgcgacagagccgg	3'	Diff	gp1a	...(((((((((((((..(((..((((((.(((((........)).)))))))))..))).))))))))))))).	71	72	-46.3	0.9	25	96	23.3	103.004	middle	3.58e-17	6.19e-18
2	3	ssc-mir-4338-p3	TTCCCATTGAGACTGAGCATCT	22	333779234	-	115019	115096	atctctcgagaTGTTCAGTCTCAGTGGGAACCGTgtgtaagtcttgTTCCCATTGAGACTGAGCATCTcaagggatca	1	ssc-mir-4338,	ssc-mir-4338	atctctcgagATGTTCAGTCTCAGTGGGAACCgtgtgtaagtcttgttcccattgagactgagcatctcaagggatca	ssc-mir-4338-p3	ttcccattgagactgagcatct	3'	Yes	gp1a	((((((.((((((((((((((((((((((((..............)))))))))))))))))))))))).))))))..	76	47.4	-48.8	1.3	5	20	4.65999	21.4592	middle	9.8599e-05	0.00016058
3	4	ssc-miR-26a	TTCAAGTAATCCAGGATAGGCT	22	333779257	+	40640	40723	ggctgtggctggaTTCAAGTAATCCAGGATAGGCTgtttccatctgtgaggCCTATTCTTGATTACTTGTTTCtggaggcagct	6	ssc-mir-26a,cfa-mir-26a-2,ptr-mir-26a-2,cgr-mir-26a,mmu-mir-26a-2,mdo-mir-26-1,	ssc-mir-26a	ggctgtggctggaTTCAAGTAATCCAGGATAGGCTgtttccatctgtgaggcctattcttgattacttgtttctggaggcagct	ssc-miR-26a	TTCAAGTAATCCAGGATAGGCT	5'	Yes	gp1a	((((((..(..((..(((((((((.((((((((((..............)))))))))).)))))))))..))..)..))))))	84	47.6	-42.2	1.1	36020	30577	33570.6	32807.9	high	0	3.99e-155
4	6	ssc-miR-542-5p_R+2	TCGGGGATCATCATGTCACGAGA	23	333779958	+	3331	3440	ggtcaaggatgcacagacctcagacgtcTCGGGGATCATCATGTCACGAGAgaccactgtgcactTGTGACAGATTGATAACTGAAAggtctgggagccgctcatcttca	11	ssc-mir-542,bta-mir-542,eca-mir-542,cfa-mir-542,hsa-mir-542,ggo-mir-542,ppy-mir-542,mml-mir-542,cgr-mir-542,mmu-mir-542,rno-mir-542,	ssc-mir-542	cctcagacgtcTCGGGGATCATCATGTCACGAgagaccactgtgcactTGTGACAGATTGATAACTGAAAggtctgggag	ssc-miR-542-5p	TCGGGGATCATCATGTCACGA	5'	Diff	gp1a	.....((((((.......(((((((...((((..((((...(((((((((..((....))...)))))))))...))))..))))...))))))).......))))))..	77	51.8	-36.3	0.6	46	246	42.872	263.948	middle	5.53e-49	4.24e-52
8	15	bta-miR-652_R+1	AATGGCGCCACTAGGGTTGTGT	22	333780298	-	52746	52848	cgccacgaatggctatgcactgcaCAACCCTAGGAGAGGGTGCCATTCAcatagactataattgAATGGCGCCACTAGGGTTGTGCagtgcacaacctgcaca	10	ssc-mir-652,bta-mir-652,eca-mir-652,cfa-mir-652,ggo-mir-652,ptr-mir-652,ppy-mir-652,mml-mir-652,cgr-mir-652,rno-mir-652,	bta-mir-652	acgaatggctatgcactgcacaaccctaggagagggtgccattcacatagactagaattgAATGGCGCCACTAGGGTTGTGcagtgcacaacctacac	bta-miR-652	AATGGCGCCACTAGGGTTGTG	3'	Diff	gp1a	.((((....))))..((((((((((((((((((.....(((((((((((..((.....))..))))))))))).))))))))))))))))))...........	77	52.4	-56	1	557	565	519.123	606.223	middle	1.07e-10	7.93e-11
9	16	ssc-miR-381	AGCGAGGTTGCCCTTTGTATATT	23	333781020	-	27135	27247	agcgatggacctgcccagcgctattgtttggtacttaaAGCGAGGTTGCCCTTTGTATATTcgggttttgaggtggaaTATACAAGGACAAGCTCTCTGTgagtatcaaacct	9	ssc-mir-381,bta-mir-381,oar-mir-381,eca-mir-381,hsa-mir-381,ggo-mir-381,ptr-mir-381,cgr-mir-381,rno-mir-381,	ssc-mir-381	tggtacttaaAGCGAGGTTGCCCTTTGTATATTcgggttttgaggtggaatatacaaggacaagctctctgtgagtatcaaa	ssc-miR-381	AGCGAGGTTGCCCTTTGTATATT	5'	Yes	gp1a	((((.(((......))).))))...((((((((((((.((.(((.(((.((((.((((((((.............)))))))))))).))).))).)).))))))))))))..	86	46	-44.4	0.9	3	12	2.796	12.8755	middle	0.0025589	0.00291982
10	18	ssc-miR-376a-5p_R-1	GTAGATTCTCCTTCTATGAGTA	22	333781020	-	30843	30948	gaatccttctttggtatttaaaagGTAGATTCTCCTTCTATGAGTAcattatttattattaATCATAGAGGAAAATCCACGTtttcagtatcaaatgctgcttgga	10	ssc-mir-376a,bta-mir-376a,oar-mir-376a,eca-mir-376a,cfa-mir-376a-1,hsa-mir-376a-1,ggo-mir-376a,ptr-mir-376a-1,mmu-mir-376a,rno-mir-376a,	ssc-mir-376a	ggtatttaaaagGTAGATTCTCCTTCTATGAGTACattatttattattaATCATAGAGGAAAATCCACGTtttcagtatc	ssc-miR-376a-5p	GTAGATTCTCCTTCTATGAGTAC	5'	Diff	gp1a	...(((...(((((((((.((((.((.((((.((((.((((((...................)))))))))).)))).)).)))).)))))))))........)))	103	31.1	-25.6	0.8	0	16.5	0	17.7038	middle	2.39e-06	4.33e-07
12	22	ssc-miR-151-5p	TCGAGGAGCTCACAGTCTAGT	21	333781281	+	7084	7177	cacttttcctgcccTCGAGGAGCTCACAGTCTAGTacgtctcatcccctaCTAGACTGAAGCTCCTTGAGGacagggatcgtcatactcacctc	9	ssc-mir-151,bta-mir-151,eca-mir-151,hsa-mir-151a,ggo-mir-151a,ptr-mir-151,cgr-mir-151,mmu-mir-151,rno-mir-151,	ssc-mir-151	ttttcctgcccTCGAGGAGCTCACAGTCTAGTacgtctcatcccctaCTAGACTGAAGCTCCTTGAGGAcagggatcgtc	ssc-miR-151-5p	TCGAGGAGCTCACAGTCTAGT	5'	Yes	gp1a	.((..((((((.((((((((((((..((((((((((............)))))))))).)))))))))))).))))))..))............	81	53.2	-45.5	0.9	21876.5	15632.5	20388.9	16773.1	high	0.0013398	0.000688496
13	24	ssc-miR-140-5p_L+1	CAGTGGTTTTACCCTATGGTAG	22	333782411	+	107242	107380	ggctcccngtgtggctcccgccccgtgtgtgtctgtctctctgtgtcctgcCAGTGGTTTTACCCTATGGTAGgttacgtcatgctgttcTACCACAGGGTAGAACCACGGAcaggataccggggcaccctctgcatcg	11	ssc-mir-140,bta-mir-140,eca-mir-140,cfa-mir-140,hsa-mir-140,ggo-mir-140,mne-mir-140,cgr-mir-140,rno-mir-140,sha-mir-140,oan-mir-140,	ssc-mir-140	cctgccAGTGGTTTTACCCTATGGTAGgttacgtcatgctgttcTACCACAGGGTAGAACCACGGACagg	ssc-miR-140-5p	AGTGGTTTTACCCTATGGTAG	5'	Diff	gp1a	........(((..(.....((((((.................((((((((((.(((((((((((((.(((((((..(((......)))))))))).))))))))))))))).)))))))))))))).....)..)))..	78	59	-61.5	0.7	532	1847	495.823	1981.76	middle	0	2.41e-290
13	25	ssc-miR-140-3p_R-1	TACCACAGGGTAGAACCACGGA	22	333782411	+	107242	107380	ggctcccngtgtggctcccgccccgtgtgtgtctgtctctctgtgtcctgcCAGTGGTTTTACCCTATGGTAGgttacgtcatgctgttcTACCACAGGGTAGAACCACGGAcaggataccggggcaccctctgcatcg	11	ssc-mir-140,bta-mir-140,eca-mir-140,cfa-mir-140,hsa-mir-140,ggo-mir-140,mne-mir-140,cgr-mir-140,rno-mir-140,sha-mir-140,oan-mir-140,	ssc-mir-140	cctgccAGTGGTTTTACCCTATGGTAGgttacgtcatgctgttcTACCACAGGGTAGAACCACGGACagg	ssc-miR-140-3p	TACCACAGGGTAGAACCACGGAC	3'	Diff	gp1a	........(((..(.....((((((.................((((((((((.(((((((((((((.(((((((..(((......)))))))))).))))))))))))))).)))))))))))))).....)..)))..	78	59	-61.5	0.7	14321	13416	13347.2	14394.8	high	0	6.97e-142
14	26	hsa-miR-1307-5p	TCGACCGGACCTCGACCGGCT	21	347611662	-	46341	46469	tcaagagccagccaagtcactgtcactgcctaccaatcTCGACCGGACCTCGACCGGCTcgtctatgttgccaatcgACTCGGCGTGGCGTCGGTCGTGGtagataggcggtcatacagacgaattttc	4	ssc-mir-1307,cfa-mir-1307,hsa-mir-1307,ptr-mir-1307,	hsa-mir-1307	catcaagacccagctgagtcactgtcactgcctaccaatcTCGACCGGACCTCGACCGGCTcgtctgtgttgccaatcgACTCGGCGTGGCGTCGGTCGTGgtagataggcggtcatgcatacgaattttcagctcttgttctggtgac	hsa-miR-1307-5p	TCGACCGGACCTCGACCGGCT	5'	Yes	gp1a	...............(((..(((.((((((((...(((.(((((((.((.((.(((..(((..............)))..))))).))..))))))).)))...)))))))).)))..)))........	106	56.6	-42.7	0.6	506	1120	471.591	1201.72	middle	0	1.01e-114
14	27	ssc-miR-1307_R+1	ACTCGGCGTGGCGTCGGTCGTGG	23	347611662	-	46341	46469	tcaagagccagccaagtcactgtcactgcctaccaatcTCGACCGGACCTCGACCGGCTcgtctatgttgccaatcgACTCGGCGTGGCGTCGGTCGTGGtagataggcggtcatacagacgaattttc	4	ssc-mir-1307,cfa-mir-1307,hsa-mir-1307,ptr-mir-1307,	ssc-mir-1307	ctaccaatctcgaccggacctcgaccggctcgtctatgttgccaatcgACTCGGCGTGGCGTCGGTCGTGgtagataggc	ssc-miR-1307	ACTCGGCGTGGCGTCGGTCGTG	3'	Diff	gp1a	...............(((..(((.((((((((...(((.(((((((.((.((.(((..(((..............)))..))))).))..))))))).)))...)))))))).)))..)))........	106	56.6	-42.7	0.6	551	1321	513.531	1417.38	middle	0	6.02e-148
15	28	ssc-miR-15a_R+3	TAGCAGCACATAATGGTTTGTGGA	24	347612452	+	70411	70505	accttggagtaaagTAGCAGCACATAATGGTTTGTGGAttttgaaaaggtgCAGGCCATATTGTGCTGCCTCAAAaatacaaggatctgatcttc	8	ssc-mir-15a,bta-mir-15a,eca-mir-15a,cfa-mir-15a,cgr-mir-15a,mmu-mir-15a,mdo-mir-15a,oan-mir-15a,	ssc-mir-15a	ttggagtaaagTAGCAGCACATAATGGTTTGTggattttgaaaaggtgcaggccatattgtgctgcctcaaaaatacaa	ssc-miR-15a	TAGCAGCACATAATGGTTTGT	5'	Diff	gp1a	.(((((..........((((((((..((((..(((...............)))..))))..))))))))..........)))))...........	53	41.1	-29.4	0.8	403.5	779	376.062	835.836	middle	6.41e-67	2.73e-67
17	32	ssc-miR-885-5p	TCCATTACACTACCCTGCCTCT	22	347613140	-	42294	42364	cgctctcTCCATTACACTACCCTGCCTCTtctccacgagAGGCAGCGGGGTGTAGTGGATagagcacgggt	5	ssc-mir-885,bta-mir-885,eca-mir-885,hsa-mir-885,ptr-mir-885,	ssc-mir-885	cactcggcccgcgctctcTCCATTACACTACCCTGCCTCTtctccacgagAGGCAGCGGGGTGTAGTGGATagagcacgg	ssc-miR-885-5p	TCCATTACACTACCCTGCCTCT	5'	Yes	gp1a	.(((((.(((((((((((.(((((((((((......))))))))).))))))))))))).)))))......	64	59.2	-43.7	1	16426	17389	15309	18657.7	high	0	0
17	33	ssc-miR-885-3p	AGGCAGCGGGGTGTAGTGGAT	21	347613140	-	42294	42364	cgctctcTCCATTACACTACCCTGCCTCTtctccacgagAGGCAGCGGGGTGTAGTGGATagagcacgggt	5	ssc-mir-885,bta-mir-885,eca-mir-885,hsa-mir-885,ptr-mir-885,	ssc-mir-885	cactcggcccgcgctctcTCCATTACACTACCCTGCCTCTtctccacgagAGGCAGCGGGGTGTAGTGGATagagcacgg	ssc-miR-885-3p	AGGCAGCGGGGTGTAGTGGAT	3'	Yes	gp1a	.(((((.(((((((((((.(((((((((((......))))))))).))))))))))))).)))))......	64	59.2	-43.7	1	6934	11052	6462.48	11858.4	high	0	0
18	35	ssc-miR-532-3p	CCTCCCACACCCAAGGCTTGCA	22	347618775	+	48632024	48632114	cttgctttctctcttaCATGCCTTGAGTGTAGGACCGTtggcatctgaatacCCTCCCACACCCAAGGCTTGCAggagggccagccttctc	8	ssc-mir-532,bta-mir-532,eca-mir-532,cfa-mir-532,ptr-mir-532,mml-mir-532,mmu-mir-532,rno-mir-532,	ssc-mir-532	ttgctttctctcttaCATGCCTTGAGTGTAGGACCGTtggcatctgaatacCCTCCCACACCCAAGGCTTGCAggagggc	ssc-miR-532-3p	CCTCCCACACCCAAGGCTTGCA	3'	Yes	gp1a	...(((..(((((((.((.((((((.((((.(((..((............))..))).)))).)))))).)).)))))))..)))......	82	54.9	-32.1	0.6	302	324	281.464	347.639	middle	3.22e-08	1.91e-08
19	36	eca-miR-500	TAATCCTTGCTACCTGGGTGAGA	23	347618775	+	48637984	48638080	tgttctggctcccctctcTAATCCTTGCTACCTGGGTGAGAgtgctgtgtgaatgcaATGCACCTGGGCAAGGATTCTGAgagtgagagcatcatct	8	ssc-mir-500,eca-mir-500-1,cfa-mir-502,hsa-mir-500a,ggo-mir-502b,ptr-mir-500-1,mml-mir-500,mml-mir-502,	eca-mir-500-1	gctccccctctcTAATCCTTGCTACCTGGGTGAGAgtgttgtctgaatgcaatgcacctgggcaaggattccgagagcgagagc	eca-miR-500	TAATCCTTGCTACCTGGGTGAGA	5'	Yes	gp1a	.......((((..(((((.(((((((((...(..((((....(((.........)))...))))..))))))))))..)))))...)))).......	83	51.5	-38.9	0.8	1281	2647	1193.89	2840.13	middle	0	8.65e-246
20	38	ssc-miR-362_R-1	AATCCTTGGAACCTAGGTGTGAGT	24	347618775	+	48638449	48638551	gagccttctcatctgctccccctctcaAATCCTTGGAACCTAGGTGTGAGTgctgctctagtgcAACACACCTATTCAAGGATTCAaagaggctgagccttgt	10	ssc-mir-362,bta-mir-362,eca-mir-362,cfa-mir-362,hsa-mir-362,ggo-mir-362,ptr-mir-362,ppy-mir-362,mml-mir-362,cgr-mir-362,	ssc-mir-362	ccccctctcaAATCCTTGGAACCTAGGTGTGAGTGctgctctagtgcaacacacctattcaaggattcaaagaggctga	ssc-miR-362	AATCCTTGGAACCTAGGTGTGAGTG	5'	Diff	gp1a	(((....)))....((((..(((((..((((((((((...((((((((.(..(((...)))..)..))))))))))))))))))...)))))..)))).....	84	50.5	-40.8	0.8	266	331	247.912	355.15	middle	5.65e-13	5.03e-13
21	41	ssc-miR-676-3p	CCGTCCTAAGGTTGTTGAGTT	21	347618775	+	63280903	63281012	agacttcacatcagttcctgacctgaacgcgtgaCTCTTCAATCTCAGGACTCGCAtaattagcagaatgCCGTCCTAAGGTTGTTGAGTTctgcgtttctgggcatttc	4	ssc-mir-676-1,ssc-mir-676-2,ppy-mir-676,mml-mir-676,	ssc-mir-676-2	aacgcgtgaCTCTTCAATCTCAGGACTCGCAtaattagcagaatgCCGTCCTAAGGTTGTTGAGTTctgcgtttct	ssc-miR-676-3p	CCGTCCTAAGGTTGTTGAGTT	3'	Yes	gp1a	..................((.((((((((((..((((..((((((.(((((..((((..........)))).))))).))))))..))))..)))))))..)))))....	88	47.3	-35.6	0.7	698	2028	650.535	2175.96	middle	0	1.29e-274
25	46	ssc-miR-98	TGAGGTAGTAAGTTGTATTGTT	22	347618775	-	51800843	51800961	aggattctgctcatgccggggTGAGGTAGTAAGTTGTATTGTTgtggggtagggattttaggccccaattagaagataaCTATACAACTTACTACTTTCCCtggggtgtagcatgttca	9	ssc-mir-98,bta-mir-98,eca-mir-98,cfa-mir-98,hsa-mir-98,ggo-mir-98,cgr-mir-98,mmu-mir-98,rno-mir-98,	ssc-mir-98	gggTGAGGTAGTAAGTTGTATTGTTgtggggtagggattttaggccccaattagaagataactatacaacttactacttt	ssc-miR-98	TGAGGTAGTAAGTTGTATTGTT	5'	Yes	gp1a	.((((..((((((..((((((.(((((((((((((((((.((((((((((...........)))))).........)))).)))))))))))))))))))))))..)).)))).)))).	117	44.5	-53.3	1	3680.93	2760.81	3430.62	2962.24	middle	0.0011006	0.000599558
26	48	ssc-let-7f	TGAGGTAGTAGATTGTATAGTT	22	347618775	-	51801728	51801810	tgtgggaTGAGGTAGTAGATTGTATAGTTttagggtcataccccatcttggagataaCTATACAGTCTACTGTCTTTCCcacg	3	ssc-let-7f-1,ptr-let-7f-2,mdo-let-7f-2,	ssc-let-7f-1	tgtgggaTGAGGTAGTAGATTGTATAGTTttagggtcataccccatcttggagataactatacagtctactgtctttcccacg	ssc-let-7f	TGAGGTAGTAGATTGTATAGTT	5'	Yes	gp1a	.((((((.(((..((((((((((((((((...(((.....))).(((.....)))))))))))))))))))..))))))))).	81	42.2	-40.7	1.2	188897	179922	176052	193049	high	0	0
30	56	ssc-miR-545-5p_R+1	TCAGTAAATGTTTATTGGATGA	22	347618775	-	67530183	67530288	cccagcctggcacattagtaggccTCAGTAAATGTTTATTGGATGAataaatgaatgactcATCAACAAACATTTATTGTGTGCctgctaacgtgatctccacagg	6	ssc-mir-545,bta-mir-545,eca-mir-545,cfa-mir-545,hsa-mir-545,ptr-mir-545,	ssc-mir-545	ttagtaggccTCAGTAAATGTTTATTGGATGaataaatgaatgactcATCAACAAACATTTATTGTGTGcctgctaacg	ssc-miR-545-5p	TCAGTAAATGTTTATTGGATG	5'	Diff	gp1a	.....((((.(((.(((((((((..((((((((((((....(((((.............)))))...))))))))))))...))))))))).))).......))))	101	41.5	-34.4	0.8	29	47	27.028	50.4291	middle	0.00022915	0.000213446
30	57	ssc-miR-545-3p_R+1	ATCAACAAACATTTATTGTGTGA	23	347618775	-	67530183	67530288	cccagcctggcacattagtaggccTCAGTAAATGTTTATTGGATGAataaatgaatgactcATCAACAAACATTTATTGTGTGCctgctaacgtgatctccacagg	6	ssc-mir-545,bta-mir-545,eca-mir-545,cfa-mir-545,hsa-mir-545,ptr-mir-545,	ssc-mir-545	ttagtaggccTCAGTAAATGTTTATTGGATGaataaatgaatgactcATCAACAAACATTTATTGTGTGcctgctaacg	ssc-miR-545-3p	ATCAACAAACATTTATTGTGTG	3'	Diff	gp1a	.....((((.(((.(((((((((..((((((((((((....(((((.............)))))...))))))))))))...))))))))).))).......))))	101	41.5	-34.4	0.8	93	204	86.6759	218.884	middle	6.89e-22	4.64e-22
32	60	ssc-miR-361-5p	TTATCAGAATCTCCAGGGGTAC	22	347618775	-	78804767	78804870	cctgggatttgggagcTTATCAGAATCTCCAGGGGTACttataatttgaaaaagTCCCCCAGGTGTGATTCTGATTtgcttcctcctcctcctcctctgagaat	10	ssc-mir-361,bta-mir-361,eca-mir-361,cfa-mir-361,hsa-mir-361,ggo-mir-361,ptr-mir-361,cgr-mir-361,mmu-mir-361,rno-mir-361,	ssc-mir-361	ggagcTTATCAGAATCTCCAGGGGTACttataatttgaaaaagtCCCCCAGGTGTGATTCTGATTTGCttcctcctcctc	ssc-miR-361-5p	TTATCAGAATCTCCAGGGGTAC	5'	Yes	gp1a	...((((...((((((..(((((((((.((.((((.((((...........)))).)))).))...)))))))))..))))))...)))).(((....)))...	87	46.2	-39.9	0.8	873	709	813.635	760.729	middle	0.0013586	0.0007633
34	65	ssc-miR-363_R-1	AATTGCACGGTATCCATCTGTA	22	347618775	-	126199342	126199433	ctgttttgctgttgtCGGGTGGATCACGATGCAATTTtgattagtatcataggagaaaAATTGCACGGTATCCATCTGTAaaccgcaggacc	12	ssc-mir-363-2,ssc-mir-363-1,bta-mir-363,eca-mir-363,cfa-mir-363,hsa-mir-363,ggo-mir-363,ppy-mir-363,mmu-mir-363,rno-mir-363,mdo-mir-363,oan-mir-363,	ssc-mir-363-1	gctgttgtcgggtggatcacgatgcaattttgattagtatcataggagaaaAATTGCACGGTATCCATCTGTAAaccgca	ssc-miR-363	AATTGCACGGTATCCATCTGTAA	3'	Diff	gp1a	..((..(((.(((..(((((((((..((.(((((((((..(((......)))....)))))))))))..)))))))))..))).)))..)).	89	43.5	-33.8	0.8	329	340	306.628	364.807	middle	1.71e-07	1.22e-07
35	67	ssc-miR-92a	TATTGCACTTGTCCCGGCCTGT	22	347618775	-	126199512	126199591	ctttcatccgtGGGTGGGGATTTGTTGCATTACTtgtggtgtgtataaagTATTGCACTTGTCCCGGCCTGTggaagaaa	7	ssc-mir-92a-2,bta-mir-92a-2,eca-mir-92a-2,cfa-mir-92a-2,hsa-mir-92a-2,ptr-mir-92-2,lca-mir-92-2,	ssc-mir-92a-2	ctttcatccgtgggtggggatttgttgcattacttgtggtgtgtataaagTATTGCACTTGTCCCGGCCTGTggaagaaa	ssc-miR-92a	TATTGCACTTGTCCCGGCCTGT	3'	Yes	gp1a	.((((.((((..((..(((((..(.((((.(((((............))))).)))))..)))))..))..)))).))))	79	46.2	-33.3	0.9	20856	18496.3	19437.8	19845.8	high	0	3.36e-135
36	68	ssc-miR-19b	TGTGCAAATCCATGCAAAACTGA	23	347618775	-	126199645	126199741	gacactgctacttacagttagttttgcaggtttgcatttcagcgtatgtatgtgtatatggcTGTGCAAATCCATGCAAAACTGAttgtgatgatgt	9	ssc-mir-19b-2,bta-mir-19b-2,eca-mir-19b-2,cfa-mir-19b-2,hsa-mir-19b-2,ptr-mir-19b-2,age-mir-19b-2,sla-mir-19b-2,rno-mir-19b-2,	ssc-mir-19b-2	tacagttagttttgcaggtttgcatttcagcgtatgtatgtgtatatggcTGTGCAAATCCATGCAAAACTGAttgtgat	ssc-miR-19b	TGTGCAAATCCATGCAAAACTGA	3'	Yes	gp1a	...........(((((((((((((((((((((((((...((((.((((((....)))))))))))))))).)).)))))))))))))))))......	80	39.2	-38.2	1	4020	4590	3746.64	4924.89	middle	0	2.45e-120
37	69	ssc-miR-20b	CAAAGTGCTCACAGTGCAGGTAG	23	347618775	-	126199775	126199854	ccggcagtacCAAAGTGCTCACAGTGCAGGTAGgttttgcattactcTACTGTAGTGTGGGCACTTCCAgtactcttgga	5	ssc-mir-20b-1,bta-mir-20b,eca-mir-20b,cfa-mir-20b,mml-mir-20b,	ssc-mir-20b-1	ccggcagtacCAAAGTGCTCACAGTGCAGGTAGgttttgcattactctactgtagtgtgggcacttccagtactcttgga	ssc-miR-20b	CAAAGTGCTCACAGTGCAGGTAG	5'	Yes	gp1a	(((..(((((..(((((((((((.(((((.(((((........)).)))))))).)))))))))))...)))))..))).	79	50	-35.8	0.9	142	196	132.344	210.3	middle	2.02e-10	1.6e-10
39	73	ssc-miR-106a_R-1_1ss1AC	CAAAGTGCTTACAGTGCAGGTAG	23	347618775	-	126200183	126200263	ccttggccgtgtAAAAGTGCTTACAGTGCAGGTAGctttttgagatcTACTGCAATGCAAGCACTTCTTacattaccatgg	6	ssc-mir-106a,bta-mir-106a,eca-mir-106a,cfa-mir-106a,hsa-mir-106a,rno-mir-17-2,	ssc-mir-106a	ccttggccgtgtAAAAGTGCTTACAGTGCAGGTAGCtttttgagatctactgcaatgcaagcacttcttacattaccatgg	ssc-miR-106a	AAAAGTGCTTACAGTGCAGGTAGC	5'	Diff	gp1a	((.(((..((((((((((((((.((.(((((.(((.((.....)).)))))))).)).)))))))).))))))..))).))	81	44.4	-30.4	0.8	983	4140	916.155	4442.06	middle	0	0
40	75	cfa-miR-505_R+1	GGGAGCCAGGAAGTATTGATGTT	23	347618775	-	130835619	130835730	taaattgatgcactcagtggGGGAGCCAGGAAGTATTGATGTTtctgccaggttagcGTCAACACTTGCTGGTTTCCTCTctggagcatcactgagttcgtggattttcatt	9	ssc-mir-505,bta-mir-505,eca-mir-505,cfa-mir-505,ggo-mir-505,ptr-mir-505,cgr-mir-505,mmu-mir-505,rno-mir-505,	cfa-mir-505	cagtggGGGAGCCAGGAAGTATTGATGTttctgccagtttagcgtcaacacttgctggtttcctctctggagcatc	cfa-miR-505	GGGAGCCAGGAAGTATTGATGT	5'	Diff	gp1a	.....((((((.(.(((.(((((((((((.((((.((((((((.((....))..)))))))).)))).))))))))))).)))).))))))..(((((....))))).....	86	46.4	-47	0.9	25	42	23.3	45.0643	middle	0.00032234	0.00022874
40	76	ssc-miR-505_L+1	GTCAACACTTGCTGGTTTCCTCT	23	347618775	-	130835619	130835730	taaattgatgcactcagtggGGGAGCCAGGAAGTATTGATGTTtctgccaggttagcGTCAACACTTGCTGGTTTCCTCTctggagcatcactgagttcgtggattttcatt	9	ssc-mir-505,bta-mir-505,eca-mir-505,cfa-mir-505,ggo-mir-505,ptr-mir-505,cgr-mir-505,mmu-mir-505,rno-mir-505,	ssc-mir-505	gcactcagtgggggagccaggaagtattgatgtttctgccaggttagcgTCAACACTTGCTGGTTTCCTCTctggagcat	ssc-miR-505	TCAACACTTGCTGGTTTCCTCT	3'	Diff	gp1a	.....((((((.(.(((.(((((((((((.((((.((((((((.((....))..)))))))).)))).))))))))))).)))).))))))..(((((....))))).....	86	46.4	-47	0.9	1872	3747	1744.7	4020.38	middle	0	0
43	82	ssc-miR-29b	TAGCACCATTTGAAATCAGTGTT	23	347618776	+	19034818	19034902	gcttcttcaggaaGCTGGTTTCATATGGTGGTTTAGAtttaaaaagtgattgtcTAGCACCATTTGAAATCAGTGTTcttggggg	7	ssc-mir-29b-1,bta-mir-29b-1,cfa-mir-29b-1,cgr-mir-29b,mmu-mir-29b-1,rno-mir-29b-1,mdo-mir-29b,	ssc-mir-29b-1	cttcaggaagctggtttcatatggtggtttagatttaaaaagtgattgtcTAGCACCATTTGAAATCAGTGTTcttggggg	ssc-miR-29b	TAGCACCATTTGAAATCAGTGTT	3'	Yes	gp1a	....(..((((((((((((((((.((((((..((((((.............)))))))))))).)))))))))).))))))..).	80	40	-34	1	205.583	378.667	191.603	406.294	middle	2.62e-31	2.66e-31
44	83	cgr-miR-29a-5p_R-2	ACTGATTTCTTTTGGTGTTCAG	22	347618776	+	19035224	19035311	accccttagaggatgACTGATTTCTTTTGGTGTTCAGagtcaatataattttcTAGCACCATCTGAAATCGGTTataatgattgggga	7	ssc-mir-29a,bta-mir-29a,eca-mir-29a,cfa-mir-29a,cgr-mir-29a,mmu-mir-29a,mdo-mir-29a,	cgr-mir-29a	ttagaggatgACTGATTTCTTTTGGTGTTCAGAGtcaatagaattttcTAGCACCATCTGAAATCGGTTataatgatt	cgr-miR-29a-5p	ACTGATTTCTTTTGGTGTTCAGAG	5'	Diff	gp1a	.((((.......((((((((((((...(((((((.((((...........)))))))))))...)))))))))))).......)))).	64	37.5	-34.6	1	76	163	70.8319	174.893	middle	2.3e-17	1.59e-17
44	84	ssc-miR-29a_L-1R-1	TAGCACCATCTGAAATCGGTT	21	347618776	+	19035224	19035311	accccttagaggatgACTGATTTCTTTTGGTGTTCAGagtcaatataattttcTAGCACCATCTGAAATCGGTTataatgattgggga	7	ssc-mir-29a,bta-mir-29a,eca-mir-29a,cfa-mir-29a,cgr-mir-29a,mmu-mir-29a,mdo-mir-29a,	ssc-mir-29a	ccccttagaggatgactgatttcttttggtgttcagagtcaatataattttCTAGCACCATCTGAAATCGGTTAtaatgattgggg	ssc-miR-29a	CTAGCACCATCTGAAATCGGTTA	3'	Diff	gp1a	.((((.......((((((((((((...(((((((.((((...........)))))))))))...)))))))))))).......)))).	64	37.5	-34.6	1	25752.8	55930	24001.5	60010.7	high	0	0
45	86	hsa-miR-183-3p_L-1R+1	TGAATTACCGAAGGGCCATAAT	22	347618776	+	20030634	20030739	agagcgcgactcctgttctgtgTATGGCACTGGTAGAATTCACTgtgaacagtctcggtcagTGAATTACCGAAGGGCCATAAAcagagcagagacagatccgcga	11	ssc-mir-183,eca-mir-183,cfa-mir-183,hsa-mir-183,ppy-mir-183,mml-mir-183,sla-mir-183,cgr-mir-183,mmu-mir-183,rno-mir-183,mdo-mir-183,	hsa-mir-183	ccgcagagtgtgactcctgttctgtgTATGGCACTGGTAGAATTCACTgtgaacagtctcagtcaGTGAATTACCGAAGGGCCATAAacagagcagagacagatccacga	hsa-miR-183-3p	GTGAATTACCGAAGGGCCATAA	3'	Diff	gp1a	...(((.((.(((((((((((.((((((..(((((..(((((((((((......)))..)))))))))))))....)))))).))))))))).))....)))))..	101	50.9	-42.5	0.8	42	52	39.144	55.794	middle	0.0045661	0.00289909
49	93	ssc-miR-148a-5p	AAAGTTCTGAGACACTCCGACT	22	347618776	+	51216008	51216118	ggaggaagacagccactttggtcttttgaggcAAAGTTCTGAGACACTCCGACTctgaatatgatagaagTCAGTGCACTACAGAACTTTGTctctggagactgtggtcgc	8	ssc-mir-148a,cfa-mir-148a,hsa-mir-148a,ggo-mir-148a,ptr-mir-148a,mmu-mir-148a,mdo-mir-148,oan-mir-148,	ssc-mir-148a	gaggcAAAGTTCTGAGACACTCCGACTctgaatatgatagaagTCAGTGCACTACAGAACTTTGTctc	ssc-miR-148a-5p	AAAGTTCTGAGACACTCCGACT	5'	Yes	gp1a	...........(((((...((((((..((((((((((((((((.((((..(((((((.......))).))))))))..)).))))))))))))))..)))))))))))...	97	47.7	-44.7	0.8	8730	9003	8136.35	9659.86	middle	0	4.65e-157
50	95	ssc-miR-671-5p	AGGAAGCCCTGGAGGGGCTGGAGG	24	347618776	-	6286670	6286787	ggtgaactggcaggccaggaagaggAGGAAGCCCTGGAGGGGCTGGAGGtgatggatgttttccTCCGGTTCTCAGGGCTCCACCttttccgggccgtggagccagggctggtgcaga	10	ssc-mir-671,bta-mir-671,eca-mir-671,cfa-mir-671,hsa-mir-671,ggo-mir-671,ptr-mir-671,cgr-mir-671,mmu-mir-671,rno-mir-671,	ssc-mir-671	caggaagaggAGGAAGCCCTGGAGGGGCTGGAGGtgatggatgttttccTCCGGTTCTCAGGGCTCCACCttttccgggc	ssc-miR-671-5p	AGGAAGCCCTGGAGGGGCTGGAGG	5'	Yes	gp1a	......(((((.((((.((((((((.(((.((((((..((..(((((((.(((....)))..)))))))..))))))))))).)))))))).)))).....))))).((....))...	100	63.6	-65	0.9	12	54	11.184	57.9399	middle	3.77e-11	1.07e-11
50	96	ssc-miR-671-3p	TCCGGTTCTCAGGGCTCCACC	21	347618776	-	6286670	6286787	ggtgaactggcaggccaggaagaggAGGAAGCCCTGGAGGGGCTGGAGGtgatggatgttttccTCCGGTTCTCAGGGCTCCACCttttccgggccgtggagccagggctggtgcaga	10	ssc-mir-671,bta-mir-671,eca-mir-671,cfa-mir-671,hsa-mir-671,ggo-mir-671,ptr-mir-671,cgr-mir-671,mmu-mir-671,rno-mir-671,	ssc-mir-671	caggaagaggAGGAAGCCCTGGAGGGGCTGGAGGtgatggatgttttccTCCGGTTCTCAGGGCTCCACCttttccgggc	ssc-miR-671-3p	TCCGGTTCTCAGGGCTCCACC	3'	Yes	gp1a	......(((((.((((.((((((((.(((.((((((..((..(((((((.(((....)))..)))))))..))))))))))).)))))))).)))).....))))).((....))...	100	63.6	-65	0.9	19	66	17.708	70.8154	middle	1.39e-11	7.97e-12
51	98	ssc-miR-490-3p_R+1	CAACCTGGAGGACTCCATGCTGT	23	347618776	-	13361959	13362081	ccttggctggtttggaaagttcattgttcgacaCCATGGATCCCCAGGTGGGtcacgtttcaagatacacCAACCTGGAGGACTCCATGCTGTtgagctgttcacaagcagcggacacttcta	10	ssc-mir-490-2,ssc-mir-490-1,bta-mir-490,eca-mir-490,cfa-mir-490,hsa-mir-490,ggo-mir-490,ptr-mir-490,ppy-mir-490,mmu-mir-490,	ssc-mir-490-1	ttgttcgacaCCATGGATCCCCAGGTGGGTcacgtttcaagatacacCAACCTGGAGGACTCCATGCTGttgagctgtt	ssc-miR-490-3p	CAACCTGGAGGACTCCATGCTG	3'	Diff	gp1a	.....(((.((((((((........((((((((.(((((((((((((((.(((...(((....)))..))).)))))).))).)))))).))))))))..))).))))))))...........	107	51.2	-46.3	0.7	8	16	7.45599	17.1674	middle	0.011139	0.00790458
54	102	ssc-miR-499-5p	TTAAGACTTGCAGTGATGTTT	21	347618777	+	43571130	43571249	tctgtcccctgcaccctgggcgggcggccgTTAAGACTTGCAGTGATGTTTaactcctctccacgtGAACATCACAGCAAGTCTGTGCTgcttcccgtccccacgctgcctgggcagggt	10	ssc-mir-499,bta-mir-499,eca-mir-499,cfa-mir-499,hsa-mir-499a,ggo-mir-499a,ptr-mir-499,ppy-mir-499,mml-mir-499,rno-mir-499,	ssc-mir-499	tgggcgggcggccgTTAAGACTTGCAGTGATGTTTaactcctctccacgtgAACATCACAGCAAGTCTGTGCTgcttccc	ssc-miR-499-5p	TTAAGACTTGCAGTGATGTTT	5'	Yes	gp1a	(((((((...(((....(((((((..((.((..((((((((.((((((((((.............)))))))))).))))))))..)).))..)))))))......)))..)))))))..	118	60.8	-54.8	0.8	186	493	173.352	528.97	middle	1.8e-61	8.44e-63
57	106	hsa-miR-103a-2-5p	AGCTTCTTTACAGTGCTGCCTTG	23	347618777	-	36149786	36149870	tctttgtgctttcAGCTTCTTTACAGTGCTGCCTTGtagcattcaggtcaAGCAGCATTGTACAGGGCTATGAaagaactaagaa	9	ssc-mir-103-2,bta-mir-103-2,eca-mir-103,cfa-mir-103-2,hsa-mir-103a-2,ptr-mir-103-2,cgr-mir-103,mmu-mir-103-2,mdo-mir-103-2,	hsa-mir-103a-2	ttgtgctttcAGCTTCTTTACAGTGCTGCCTTGtagcattcaggtcaAGCAGCATTGTACAGGGCTATGAaagaacca	hsa-miR-103a-2-5p	AGCTTCTTTACAGTGCTGCCTTG	5'	Yes	gp1a	((((.((.((((((((.(((.(((((((((((((((.......))))....))))))))))).))))))..))))).)).)))).	84	42.4	-31.9	0.9	19	68	17.708	72.9613	middle	4.17e-12	2.42e-12
57	107	ssc-miR-103	AGCAGCATTGTACAGGGCTATGA	23	347618777	-	36149786	36149870	tctttgtgctttcAGCTTCTTTACAGTGCTGCCTTGtagcattcaggtcaAGCAGCATTGTACAGGGCTATGAaagaactaagaa	9	ssc-mir-103-2,bta-mir-103-2,eca-mir-103,cfa-mir-103-2,hsa-mir-103a-2,ptr-mir-103-2,cgr-mir-103,mmu-mir-103-2,mdo-mir-103-2,	ssc-mir-103-2	tgtgctttcagcttctttacagtgctgccttgtagcattcaggtcaAGCAGCATTGTACAGGGCTATGAaagaactaaga	ssc-miR-103	AGCAGCATTGTACAGGGCTATGA	3'	Yes	gp1a	((((.((.((((((((.(((.(((((((((((((((.......))))....))))))))))).))))))..))))).)).)))).	84	42.4	-31.9	0.9	13229.8	16002	12330.2	17169.5	high	0	0
58	108	ssc-miR-296-3p_R+1	AGGGTTGGGCGGAGGCTTTCCT	22	347618777	-	66288704	66288782	aggacccttccggagggccccccccaatcctgttgtgctggattcagAGGGTTGGGCGGAGGCTTTCCTgaaggctctg	3	ssc-mir-296,bta-mir-296,eca-mir-296,	ssc-mir-296	gacccttccgGAGGGCCCCCCCCAATCCTGTtgtgctggattcagAGGGTTGGGCGGAGGCTTTCCtgaaggctctg	ssc-miR-296-3p	AGGGTTGGGCGGAGGCTTTCC	3'	Diff	gp1a	.(((.(((((.(((..(((.(((((((((((.(((.........)))))))))))).)).)))..))).))))).))).	77	63.3	-42.1	0.8	163	360	151.916	386.266	middle	1.18e-37	5.59e-38
63	116	ssc-miR-103	AGCAGCATTGTACAGGGCTATGA	23	347618778	+	59912617	59912698	cttactgccctcGGCTTCTTTACAGTGCTGCCTTGttgcatatggatcaAGCAGCATTGTACAGGGCTATGAaggcactgag	7	ssc-mir-103-1,bta-mir-103-1,eca-mir-107a,cfa-mir-103-1,hsa-mir-103a-1,mmu-mir-103-1,mdo-mir-103-1,	ssc-mir-103-1	cttactgccctcggcttctttacagtgctgccttgttgcatatggatcaAGCAGCATTGTACAGGGCTATGAaggcactgag	ssc-miR-103	AGCAGCATTGTACAGGGCTATGA	3'	Yes	gp1a	((((.((((.(((((.(((.(((((((((((.(((............)))))))))))))).))))))..)).)))).))))	82	50	-32	0.8	13229.8	16002	12330.2	17169.5	high	0	0
66	120	ssc-miR-4334-3p	TCCCTGTCCTCCAGGAGCTC	20	347618779	+	134433005	134433073	ctgtgctgagccctggagtgacgggggtgaaagggcagagTCCCTGTCCTCCAGGAGCTCcccatgtgg	1	ssc-mir-4334,	ssc-mir-4334	ctgtgctgagCCCTGGAGTGACGGGGGTGaaagggcagagTCCCTGTCCTCCAGGAGCTCcccatgtgg	ssc-miR-4334-3p	TCCCTGTCCTCCAGGAGCTC	3'	Yes	gp1a	..(((..(((((((((((.((((((((.............))))))))))))))).))))..)))....	63	65.2	-36.8	0.8	37.8333	76.3333	35.2606	81.9027	middle	2.44e-08	1.57e-08
68	123	ssc-miR-149	TCTGGCTCCGTGTCTTCACTCCC	23	347618779	-	154447008	154447110	aggccggcgcccaggcTCTGGCTCCGTGTCTTCACTCCCgtgtgtgtccgaggaggGAGGGAGGGACGGGGGCTGTGCTggggcgaacggaacagcgcaggtc	11	ssc-mir-149,bta-mir-149,eca-mir-149,cfa-mir-149,hsa-mir-149,ggo-mir-149,ptr-mir-149,ppy-mir-149,mml-mir-149,cgr-mir-149,mmu-mir-149,	ssc-mir-149	gcccaggcTCTGGCTCCGTGTCTTCACTCCCgtgtgtgtccgaggagggagggagggacgggggctgtgctggggc	ssc-miR-149	TCTGGCTCCGTGTCTTCACTCCC	5'	Yes	gp1a	.((((((.((....)).))))))((((..((((.(((((...((....))....)))))))))..))))...((((((((............))))))))...	46	70.9	-46.2	0.6	160	153	149.12	164.163	middle	0.0039385	0.00245063
69	125	ssc-miR-185	TGGAGAGAAAGGCAGTTCCTGA	22	347618780	+	55086516	55086622	gagcggggggtgagggatTGGAGAGAAAGGCAGTTCCTGAtggtcccctccccAGGGGCTGGCTTTCCTCTGGTccttccctcccaatgaccgcgtcttcatcgagg	10	ssc-mir-185,bta-mir-185,cfa-mir-185,hsa-mir-185,ggo-mir-185,ptr-mir-185,mml-mir-185,cgr-mir-185,mmu-mir-185,rno-mir-185,	ssc-mir-185	ggtgagggatTGGAGAGAAAGGCAGTTCCTGAtggtcccctccccaggggctggctttcctctggtccttccctcc	ssc-miR-185	TGGAGAGAAAGGCAGTTCCTGA	5'	Yes	gp1a	....((((((.(((((((..(((.(((((.(((..((((..((......)).))))..))).))))))))..))))))))))))).....((.((.......)).))	81	62.6	-58.1	0.9	1156	1640	1077.39	1759.66	middle	1.83e-80	2.93e-80
69	126	hsa-miR-185-3p_R-1	AGGGGCTGGCTTTCCTCTGGT	21	347618780	+	55086516	55086622	gagcggggggtgagggatTGGAGAGAAAGGCAGTTCCTGAtggtcccctccccAGGGGCTGGCTTTCCTCTGGTccttccctcccaatgaccgcgtcttcatcgagg	10	ssc-mir-185,bta-mir-185,cfa-mir-185,hsa-mir-185,ggo-mir-185,ptr-mir-185,mml-mir-185,cgr-mir-185,mmu-mir-185,rno-mir-185,	hsa-mir-185	agggggcgagggatTGGAGAGAAAGGCAGTTCCTGAtggtcccctccccAGGGGCTGGCTTTCCTCTGGTCcttccctccca	hsa-miR-185-3p	AGGGGCTGGCTTTCCTCTGGTC	3'	Diff	gp1a	....((((((.(((((((..(((.(((((.(((..((((..((......)).))))..))).))))))))..))))))))))))).....((.((.......)).))	81	62.6	-58.1	0.9	53	132	49.3959	141.631	middle	1.04e-16	3.42e-17
70	127	ssc-miR-1306-5p	CCACCTCCCCTGCAAACGTCCA	22	347618780	+	55110940	55111043	agcgctgccccatggacagtctccaCCACCTCCCCTGCAAACGTCCAgtgatgcagaggtaatggACGTTGGCTCTGGTGGTGATGGacaggccgaaccccctg	8	ssc-mir-1306,bta-mir-1306,hsa-mir-1306,ggo-mir-1306,ptr-mir-1306,cgr-mir-1306,mmu-mir-1306,rno-mir-1306,	ssc-mir-1306	gtctccaCCACCTCCCCTGCAAACGTCCAgtgatgcagaggtaatggACGTTGGCTCTGGTGGTGATGgacaggccgaac	ssc-miR-1306-5p	CCACCTCCCCTGCAAACGTCCA	5'	Yes	gp1a	...((((((....)).)))).((((.((((.((...((.((((((((...((......))..)))))))).))...)).)))).))))((((........))))	67	61.5	-36.2	0.6	154	455	143.528	488.197	middle	1.76e-62	7.48e-64
70	128	ssc-miR-1306-3p_R+1	ACGTTGGCTCTGGTGGTGATGT	22	347618780	+	55110940	55111043	agcgctgccccatggacagtctccaCCACCTCCCCTGCAAACGTCCAgtgatgcagaggtaatggACGTTGGCTCTGGTGGTGATGGacaggccgaaccccctg	8	ssc-mir-1306,bta-mir-1306,hsa-mir-1306,ggo-mir-1306,ptr-mir-1306,cgr-mir-1306,mmu-mir-1306,rno-mir-1306,	ssc-mir-1306	gtctccaCCACCTCCCCTGCAAACGTCCAgtgatgcagaggtaatggACGTTGGCTCTGGTGGTGATGgacaggccgaac	ssc-miR-1306-3p	ACGTTGGCTCTGGTGGTGATG	3'	Diff	gp1a	...((((((....)).)))).((((.((((.((...((.((((((((...((......))..)))))))).))...)).)))).))))((((........))))	67	61.5	-36.2	0.6	126	141	117.432	151.287	middle	7.6008e-05	5.04e-05
72	132	ssc-miR-320_R-1	AAAAGCTGGGTTGAGAGGGCGA	22	347618780	-	6954934	6955040	gccacactatttatcccgcggctcctcgctccccTCCGCCTTCTCTTCCCGGTTCTtcccggagtcgggAAAAGCTGGGTTGAGAGGGCGAaaaaggaagaggggac	11	ssc-mir-320,bta-mir-320a-1,bta-mir-320a-2,cfa-mir-320,hsa-mir-320a,ggo-mir-320a,ptr-mir-320a,mml-mir-320a,cgr-mir-320a,mmu-mir-320,rno-mir-320,	ssc-mir-320	gctcccctccgccttctcttcccggttcttcccggagtcgggAAAAGCTGGGTTGAGAGGGCGAAaaaggaagaggggac	ssc-miR-320	AAAAGCTGGGTTGAGAGGGCGAA	3'	Diff	gp1a	(((................))).......((((((((((((((((..(((((((.((((((....)))))).)))))))..))))))))).........))))))).	77	60.7	-52.1	0.8	14889	13342	13876.5	14315.4	high	0	1.23e-105
75	136	ssc-miR-1296-5p	TTAGGGCCCTGGCTCCATCTCC	22	347618780	-	72055616	72055719	tcacctacctaactgggTTAGGGCCCTGGCTCCATCTCCtttaggaaaaccttctgtggggagtggggttttgaccctaacccagctgggctgtaacactgctg	7	ssc-mir-1296,bta-mir-1296,eca-mir-1296,hsa-mir-1296,ggo-mir-1296,ptr-mir-1296,mml-mir-1296,	ssc-mir-1296	cctaactgggTTAGGGCCCTGGCTCCATCTCCtttaggaaaaccttctgtgggGAGTGGGGTTTTGACCCTAACCcagctgggct	ssc-miR-1296-5p	TTAGGGCCCTGGCTCCATCTCC	5'	Yes	gp1a	.......((((.(((((((((((.....(((((((..((..(((((.....)))))..))..))))))).....))))))))))).))))..............	83	54.8	-45.2	0.8	35	76	32.62	81.545	middle	5.45e-09	4.32e-09
76	138	ssc-miR-107_R-2	AGCAGCATTGTACAGGGCTAT	21	347618780	-	110407095	110407181	ttctctctgctttcAGCTTCTTTACAGTGTTGCCTTGTggcatggagttcaAGCAGCATTGTACAGGGCTATcaaagcacagagagc	8	ssc-mir-107,bta-mir-107,cfa-mir-107,cgr-mir-107,mmu-mir-107,rno-mir-107,mdo-mir-107,oan-mir-107,	ssc-mir-107	ttctctctgctttcagcttctttacagtgttgccttgtggcatggagttcaAGCAGCATTGTACAGGGCTATCAaagcacagagagc	ssc-miR-107	AGCAGCATTGTACAGGGCTATCA	3'	Diff	gp1a	((((((.((((((.(((.(((.(((((((((((.(((............)))))))))))))).))))))...)))))).)))))).	86	47.1	-33.3	0.8	297.333	793.5	277.114	851.394	middle	0	2.41e-100
77	139	ssc-miR-202-5p_1ss16TC	TTCCTATGCATATACCTCTTT	21	347618780	-	153169585	153169664	cgccgttccgccTTCCTATGCATATACTTCTTTgagggtctggcctgaagaggtgtaggcatgggaaaccggggcgacga	1	ssc-mir-202,	ssc-mir-202	cgccgttccgccTTCCTATGCATATACTTCTTTgagggtctggcctgaAGAGGTGTAGGCATGGGAAaccggggcgacga	ssc-miR-202-5p	TTCCTATGCATATACTTCTTT	5'	Diff	gp1a	((.((..(((..(((((((((.(((((((((((.(((......)))))))))))))).)))))))))..)))..)).)).	79	57.5	-43.1	0.9	4	9	3.728	9.65665	low	0.040345	0.0380411
79	141	ssc-miR-138	AGCTGGTGTTGTGAATCAGGC	21	347618781	+	30329399	30329488	ggtgcggtggggcAGCTGGTGTTGTGAATCAGGCcgttgccaatcagagaacggctacttcacaacaccagggtcacaccccaccacagg	5	ssc-mir-138,bta-mir-138-1,eca-mir-138-2,cfa-mir-138a,hsa-mir-138-1,	ssc-mir-138	gcggtggggcAGCTGGTGTTGTGAATCAGGCcgttgccaatcagagaacggctacttcacaacaccagggtcacaccccaccaca	ssc-miR-138	AGCTGGTGTTGTGAATCAGGC	5'	Yes	gp1a	((((.((((.(((..(((((((((((((...(((((((...........)))))))..))))))))))))).))).)))).)))).....	85	60	-48.5	0.9	4	9	3.728	9.65665	low	0.040345	0.0380411
80	142	ssc-miR-135	TATGGCTTTTTATTCCTATGTGA	23	347618781	+	37564051	37564140	aggcctcgctgttctcTATGGCTTTTTATTCCTATGTGAttctactgctcattcatatagggattggagccgtggcgcacggcggggaca	8	ssc-mir-135-1,bta-mir-135a-1,eca-mir-135a,cfa-mir-135a-1,hsa-mir-135a-1,ppa-mir-135-1,ptr-mir-135a-1,mmu-mir-135a-1,	ssc-mir-135-1	aggcctcgctgttctcTATGGCTTTTTATTCCTATGTGAttctactgctcattcatatagggattggagccgtggcgcacggcggggaca	ssc-miR-135	TATGGCTTTTTATTCCTATGTGA	5'	Yes	gp1a	...(((((((((...(((((((((...((((((((((((.............))))))))))))..)))))))))...)))))))))...	84	51.1	-42.9	0.9	3	15.5	2.796	16.6309	middle	0.00024801	0.000220389
81	143	ssc-let-7g	TGAGGTAGTAGTTTGTACAGTT	22	347618781	+	37598987	37599093	ccttttgcctgattccaggcTGAGGTAGTAGTTTGTACAGTTtgagggtctatgataccacccggtacaggagataaCTGTACAGGCCACTGCCTTGCCaggaacag	8	ssc-let-7g,bta-let-7g,eca-let-7g,cfa-let-7g,hsa-let-7g,ggo-let-7g,cgr-let-7g,oan-let-7g,	ssc-let-7g	ggcTGAGGTAGTAGTTTGTACAGTTtgagggtctatgataccacccggtacaggagataactgtacaggccactgccttg	ssc-let-7g	TGAGGTAGTAGTTTGTACAGTT	5'	Yes	gp1a	........(((.((((.(((.((((((((.(..(((((((((.....((((.((.((((....))))))..)))))))))))))..).))))))))))).)))))))	99	50.5	-45.9	0.8	42232.5	34472.2	39360.7	36987.3	high	0	2.33e-117
86	154	bta-miR-99a-3p_R+4	CAAGCTCGCTTCTATGGGTCTGT	23	347618781	+	191558609	191558689	cccattggcataAACCCGTAGATCCGATCTTGTGGtgaagtggaccgcaCAAGCTCGCTTCTATGGGTCTGTgtcagtgtg	8	ssc-mir-99a,bta-mir-99a,eca-mir-99a-2,cfa-mir-99a-1,ppy-mir-99a,cgr-mir-99a,mmu-mir-99a,rno-mir-99a,	bta-mir-99a	cccattggcataAACCCGTAGATCCGATCTTGTggtgaagtggaccgcaCAAGCTCGCTTCTATGGGTctgtgtcagtgtg	bta-miR-99a-3p	CAAGCTCGCTTCTATGGGT	3'	Diff	gp1a	..((((((((((.(((((((((..(((.((((((.((........)))))))).)))..))))))))).))))))))))..	77	53.1	-39.7	0.9	518	654	482.775	701.716	middle	4.36e-25	4.43e-25
87	155	ssc-let-7c	TGAGGTAGTAGGTTGTATGGTT	22	347618781	+	191559331	191559438	gaagctgtgtgcatccgggtTGAGGTAGTAGGTTGTATGGTTtagagttacaccgtgggagttaaCTGTACAACCTTCTAGCTTTCCttggagcacacttgagccatc	8	ssc-let-7c,bta-let-7c,eca-let-7c,cfa-let-7c,ggo-let-7c,ptr-let-7c,cgr-let-7c,mmu-let-7c-1,	ssc-let-7c	tgtgtgcatccgggtTGAGGTAGTAGGTTGTATGGTTtagagttacaccgtgggagttaactgtacaaccttctagctttccttggagcacact	ssc-let-7c	TGAGGTAGTAGGTTGTATGGTT	5'	Yes	gp1a	...(((((((((.(((..(..(((.(((.((((((((..(((..((.(..(.....)..).)))))..)))))))).))).)))..)..)))))))))...)))....	101	48.1	-43.4	0.8	40059.5	34455.6	37335.4	36969.5	high	0	4.35e-196
88	157	ssc-miR-425-5p	AATGACACGATCACTCCCGTTGA	23	347618781	-	34898106	34898192	gaaagtgctttggAATGACACGATCACTCCCGTTGAgtgggcacccaagtagcCATCGGGAATGTCGTGTCCGCCcagtgctctttc	10	ssc-mir-425,bta-mir-425,cfa-mir-425,hsa-mir-425,ptr-mir-425,mml-mir-425,cgr-mir-425,mmu-mir-425,rno-mir-425,mdo-mir-425,	ssc-mir-425	aagtgctttggAATGACACGATCACTCCCGTTGAgtgggcacccaagtagccATCGGGAATGTCGTGTCCGCCCagtgct	ssc-miR-425-5p	AATGACACGATCACTCCCGTTGA	5'	Yes	gp1a	(((((.((..(((...(((((((.((.((((((((..(((....)))..))))....)))).)))))))))...)))..)).)))))	87	55.2	-36.2	0.8	19095	19322	17796.5	20731.7	high	0	9.06e-307
88	158	ssc-miR-425-3p_L+1R-1	CATCGGGAATGTCGTGTCCGCC	22	347618781	-	34898106	34898192	gaaagtgctttggAATGACACGATCACTCCCGTTGAgtgggcacccaagtagcCATCGGGAATGTCGTGTCCGCCcagtgctctttc	10	ssc-mir-425,bta-mir-425,cfa-mir-425,hsa-mir-425,ptr-mir-425,mml-mir-425,cgr-mir-425,mmu-mir-425,rno-mir-425,mdo-mir-425,	ssc-mir-425	aagtgctttggAATGACACGATCACTCCCGTTGAgtgggcacccaagtagccATCGGGAATGTCGTGTCCGCCCagtgct	ssc-miR-425-3p	ATCGGGAATGTCGTGTCCGCCC	3'	Diff	gp1a	(((((.((..(((...(((((((.((.((((((((..(((....)))..))))....)))).)))))))))...)))..)).)))))	87	55.2	-36.2	0.8	1205	2271	1123.06	2436.69	middle	0	1.44e-185
89	159	ssc-miR-191	CAACGGAATCCCAAAAGCAGCTG	23	347618781	-	34898588	34898688	acggctggacagcgggCAACGGAATCCCAAAAGCAGCTGttgtctccagagcattccaGCTGCACTTGGATTTCGTTCCctgctctcttgcctgagcagcg	11	ssc-mir-191,bta-mir-191,eca-mir-191,cfa-mir-191,hsa-mir-191,ggo-mir-191,ptr-mir-191,cgr-mir-191,mmu-mir-191,rno-mir-191a,mdo-mir-191,	ssc-mir-191	acagcgggCAACGGAATCCCAAAAGCAGCTGttgtctccagagcattccagctgcacttggatttcgttccctgctctct	ssc-miR-191	CAACGGAATCCCAAAAGCAGCTG	5'	Yes	gp1a	..(((..((.((((((.((((((((((.((..(((((((..((((....)).))..)))))))..)))))))))))).)))))).))..))).........	90	57.4	-46.7	0.8	153533	134205	143093	143997	high	0	0
89	160	hsa-miR-191-3p_R-1_2ss6GA19CT	GCTGCACTTGGATTTCGTTCC	21	347618781	-	34898588	34898688	acggctggacagcgggCAACGGAATCCCAAAAGCAGCTGttgtctccagagcattccaGCTGCACTTGGATTTCGTTCCctgctctcttgcctgagcagcg	11	ssc-mir-191,bta-mir-191,eca-mir-191,cfa-mir-191,hsa-mir-191,ggo-mir-191,ptr-mir-191,cgr-mir-191,mmu-mir-191,rno-mir-191a,mdo-mir-191,	hsa-mir-191	cggctggacagcgggCAACGGAATCCCAAAAGCAGCTGttgtctccagagcattccaGCTGCGCTTGGATTTCGTCCCCtgctctcctgcct	hsa-miR-191-3p	GCTGCGCTTGGATTTCGTCCCC	3'	Diff	gp1a	..(((..((.((((((.((((((((((.((..(((((((..((((....)).))..)))))))..)))))))))))).)))))).))..))).........	90	57.4	-46.7	0.8	148	258	137.936	276.824	middle	3.67e-20	2.83e-20
91	162	eca-miR-338-5p_R-1	AACAATATCCTGGTGCTGAGT	21	347618782	+	1507063	1507169	cagccccggacagcgcacgggccgtcctccccAACAATATCCTGGTGCTGAGTgatgacacacgcaacTCCAGCATCAGTGATTTTGTTGAagagggcagctgccag	13	ssc-mir-338,bta-mir-338,eca-mir-338,cfa-mir-338,hsa-mir-338,ggo-mir-338,ptr-mir-338,ppy-mir-338,mml-mir-338,cgr-mir-338,mmu-mir-338,rno-mir-338,mdo-mir-338,	eca-mir-338	cAACAATATCCTGGTGCTGAGTGatgacacacgcaacTCCAGCATCAGTGATTTTGTTG	eca-miR-338-5p	AACAATATCCTGGTGCTGAGTG	5'	Diff	gp1a	((((((((.........))))..((((((..((((((.(((((((((((((((..((.....))..))).))))))))).))).))))))..)))))).))))....	75	58.9	-46.1	0.7	25	44	23.3	47.2103	middle	0.00012919	9.79e-05
91	163	ssc-miR-338_R+1	TCCAGCATCAGTGATTTTGTTGA	23	347618782	+	1507063	1507169	cagccccggacagcgcacgggccgtcctccccAACAATATCCTGGTGCTGAGTgatgacacacgcaacTCCAGCATCAGTGATTTTGTTGAagagggcagctgccag	13	ssc-mir-338,bta-mir-338,eca-mir-338,cfa-mir-338,hsa-mir-338,ggo-mir-338,ptr-mir-338,ppy-mir-338,mml-mir-338,cgr-mir-338,mmu-mir-338,rno-mir-338,mdo-mir-338,	ssc-mir-338	ccgtcctccccaacaatatcctggtgctgagtgatgacacacgcaacTCCAGCATCAGTGATTTTGTTGaagagggcag	ssc-miR-338	TCCAGCATCAGTGATTTTGTTG	3'	Diff	gp1a	((((((((.........))))..((((((..((((((.(((((((((((((((..((.....))..))).))))))))).))).))))))..)))))).))))....	75	58.9	-46.1	0.7	3	9	2.796	9.65665	low	0.01822	0.0179777
93	167	ssc-miR-142-3p	TGTAGTGTTTCCTACTTTATGG	22	347618782	+	36203904	36204009	gacagacagacagtgcagtcaccCATAAAGTAGAAAGCACTACTaacagcactggagggTGTAGTGTTTCCTACTTTATGGatgagtgtactgtgggcttcggaga	9	ssc-mir-142,bta-mir-142,eca-mir-142,cfa-mir-142,ggo-mir-142,ptr-mir-142,cgr-mir-142,mdo-mir-142,oan-mir-142,	ssc-mir-142	gtgcagtcaccCATAAAGTAGAAAGCACTACTaacagcactggagggTGTAGTGTTTCCTACTTTATGGatgagtgtact	ssc-miR-142-3p	TGTAGTGTTTCCTACTTTATGG	3'	Yes	gp1a	((.((....((((((((.(((.(((((((((((.(((((((((...((....))......))))))))).))))))))))).))).))))))))...)))).....	101	47.2	-44.7	0.9	2082	1794	1940.42	1924.89	middle	6.36e-12	3.9e-12
94	169	ssc-miR-301_1ss5CG	CAGTGCAATAGTATTGTCAAAGC	23	347618782	+	37079084	37079169	tactgctaacaaatgcTCTGACTTTATTGCACTACTgtactttacagctagCAGTGCAATAGTATTGTCAAAGCatctgagagcag	7	ssc-mir-301,bta-mir-301a,eca-mir-301a,cfa-mir-301a,cgr-mir-301a,mmu-mir-301a,rno-mir-301a,	ssc-mir-301	gctaacaaatgctctgactttattgcactactgtactttacagctacCAGTCCAATAGTATTGTCAAAGCatctgagagcag	ssc-miR-301	CAGTCCAATAGTATTGTCAAAGC	3'	Diff	gp1a	..(((((..((.(((((.((((.((((((((((.(((((...))))).....))))))))))....)))).))))).))..)))))	84	39.5	-31.8	0.9	24	30	22.368	32.1888	middle	0.028931	0.0193209
95	170	ssc-miR-21_R+1	TAGCTTATCAGACTGATGTTGAC	23	347618782	+	37340385	37340476	tgtaccaccttgtcgggTAGCTTATCAGACTGATGTTGACtgttgaatctcatggCAACAGCAGTCGATGGGCTGTCtgacattttggtatc	6	ssc-mir-21,bta-mir-21,cfa-mir-21,hsa-mir-21,mmu-mir-21a,mdo-mir-21,	ssc-mir-21	tgtaccaccttgtcgggTAGCTTATCAGACTGATGTTGActgttgaatctcatggcaacagcagtcgatgggctgtctgacattttggtatc	ssc-miR-21	TAGCTTATCAGACTGATGTTGA	5'	Diff	gp1a	.((((((...((((((..(((..(((.(((((.(((((.(..(.(.....))..)))))).))))))))..)))..))))))...)))))).	90	46.7	-42.3	1	466974	474290	435219	508894	high	0	0
95	171	bta-miR-21-3p_L+1R-1	CAACAGCAGTCGATGGGCTGTC	22	347618782	+	37340385	37340476	tgtaccaccttgtcgggTAGCTTATCAGACTGATGTTGACtgttgaatctcatggCAACAGCAGTCGATGGGCTGTCtgacattttggtatc	6	ssc-mir-21,bta-mir-21,cfa-mir-21,hsa-mir-21,mmu-mir-21a,mdo-mir-21,	bta-mir-21	tgtcgggTAGCTTATCAGACTGATGTTGACTgttgaatctcatggcAACAGCAGTCGATGGGCTGTCTgaca	bta-miR-21-3p	AACAGCAGTCGATGGGCTGTCT	3'	Diff	gp1a	.((((((...((((((..(((..(((.(((((.(((((.(..(.(.....))..)))))).))))))))..)))..))))))...)))))).	90	46.7	-42.3	1	284	248	264.688	266.094	middle	0.0069207	0.00423956
99	177	ssc-miR-497	CAGCAGCACACTGTGGTTTGT	21	347618782	+	54717009	54717121	ccaccccagtcctgctcccgcccCAGCAGCACACTGTGGTTTGTacggcactgtggccacgtcCAAACCACACTGTGGTGTTAGAgcgagggtgggggaggcatcgcggaggc	11	ssc-mir-497,bta-mir-497,eca-mir-497,cfa-mir-497,hsa-mir-497,ggo-mir-497,ptr-mir-497,ppy-mir-497,cgr-mir-497,mmu-mir-497,mdo-mir-497,	ssc-mir-497	cccgcccCAGCAGCACACTGTGGTTTGTacggcactgtggccacgtccaaaccacactgtggtgttagagcgagggtggg	ssc-miR-497	CAGCAGCACACTGTGGTTTGT	5'	Yes	gp1a	...((((.(((((.(((((((((.((((.((((.(((((((((.(((((......)))..)).))))))))).)))).)))).......))))))))))))....)))).)).	109	65.5	-50.6	0.7	1224	3136	1140.77	3364.8	middle	0	0
101	181	ssc-miR-744	TGCGGGGCTAGGGCTAACAGCA	22	347618782	+	59358197	59358296	ggttgggcagggTGCGGGGCTAGGGCTAACAGCAgtcttactgaaggtttcctggaaaccacgcacatgCTGTTGCCACTAACCTCAACCttactcggtc	6	ssc-mir-744,bta-mir-744,hsa-mir-744,ptr-mir-744,cgr-mir-744,mmu-mir-744,	ssc-mir-744	gcagggTGCGGGGCTAGGGCTAACAGCAgtcttactgaaggtttcctggaaaccacgcacatgctgttgccactaacctc	ssc-miR-744	TGCGGGGCTAGGGCTAACAGCA	5'	Yes	gp1a	(..((((.(((((..((((.((((((.(((((((.((.....)).((((((...)))))).......)))))))))).))).)))).))))).))))..)	100	56	-39.8	0.7	1992	3618	1856.54	3881.97	middle	0	6.86e-278
102	184	ssc-miR-152	TCAGTGCATGACAGAACTTGG	21	347618782	-	24289531	24289641	gaggaggctcggcgccgctgtcctcccggcccAGGTTCTGTGATACACTCCGACTcgggctctggagcagTCAGTGCATGACAGAACTTGGgcccggacggaccttctgca	11	ssc-mir-152,bta-mir-152,cfa-mir-152,hsa-mir-152,ggo-mir-152,ptr-mir-152,ppy-mir-152,cgr-mir-152,mmu-mir-152,rno-mir-152,mdo-mir-152,	ssc-mir-152	cggcccaggttctgtgatacactccgactcgggctctggagcagTCAGTGCATGACAGAACTTGGgcccggacggacctt	ssc-miR-152	TCAGTGCATGACAGAACTTGG	3'	Yes	gp1a	((((.(((.....)))...(((((((.((((((((((((((.((.((((..((((...(((....))))))))))).)).)))))))))))))).))).))))))))....	84	64.9	-56.1	0.8	11499.7	8511.5	10717.7	9132.5	high	1.45e-06	7.66e-07
104	187	ssc-miR-365-3p	TAATGCCCCTAAAAATCCTTAT	22	347618782	-	45152782	45152889	gtgttcgaggacagcaagaaaaatgAGGGACTTTCAGGGGCAGCTGTGttttctgactcagtcaTAATGCCCCTAAAAATCCTTATtgttcttgcagtgttcatcggg	8	ssc-mir-365-2,bta-mir-365-2,eca-mir-365-1,cfa-mir-365-2,ptr-mir-365-2,mml-mir-365-2,mmu-mir-365-2,rno-mir-365,	ssc-mir-365-2	aaaaatGAGGGACTTTCAGGGGCAGCTGTgttttctgactcagtcaTAATGCCCCTAAAAATCCTTATtgttcttgcagt	ssc-miR-365-3p	TAATGCCCCTAAAAATCCTTAT	3'	Yes	gp1a	....((((((((((((((((.((((((((..(((.(((((((((((.(((....))).)))).....))))))))))..)))))))).)))))))..))))).)))).	103	45.4	-44.9	0.9	1931.5	1614	1800.16	1731.76	middle	1.6e-08	9.31e-09
105	188	ssc-miR-193a-5p	TGGGTCTTTGCGGGCGAGATGA	22	347618782	-	45165036	45165117	gcgggagctgagggcTGGGTCTTTGCGGGCGAGATGAgggtgttggttcAACTGGCCTACAAAGTCCCAGTcctcggccccc	11	ssc-mir-193a,bta-mir-193a,eca-mir-193a,cfa-mir-193a,hsa-mir-193a,ptr-mir-193a,ppy-mir-193a,mml-mir-193a,mmu-mir-193a,rno-mir-193,mdo-mir-193,	ssc-mir-193a	gcgggagctgagggcTGGGTCTTTGCGGGCGAGATGAgggtgttggttcAACTGGCCTACAAAGTCCCAGTcctcggccc	ssc-miR-193a-5p	TGGGTCTTTGCGGGCGAGATGA	5'	Yes	gp1a	..(((.(((((((((((((.(((((..(((.((.((((........)))).)).)))..))))).)))))))))))))))).	79	64.6	-53.5	1	2138	3451	1992.61	3702.79	middle	0	9.58e-217
105	189	ssc-miR-193a-3p	AACTGGCCTACAAAGTCCCAGT	22	347618782	-	45165036	45165117	gcgggagctgagggcTGGGTCTTTGCGGGCGAGATGAgggtgttggttcAACTGGCCTACAAAGTCCCAGTcctcggccccc	11	ssc-mir-193a,bta-mir-193a,eca-mir-193a,cfa-mir-193a,hsa-mir-193a,ptr-mir-193a,ppy-mir-193a,mml-mir-193a,mmu-mir-193a,rno-mir-193,mdo-mir-193,	ssc-mir-193a	gcgggagctgagggcTGGGTCTTTGCGGGCGAGATGAgggtgttggttcAACTGGCCTACAAAGTCCCAGTcctcggccc	ssc-miR-193a-3p	AACTGGCCTACAAAGTCCCAGT	3'	Yes	gp1a	..(((.(((((((((((((.(((((..(((.((.((((........)))).)).)))..))))).)))))))))))))))).	79	64.6	-53.5	1	1329	1012	1238.63	1085.84	middle	0.019635	0.0105569
106	190	ssc-miR-423-5p	TGAGGGGCAGAGAGCGAGACTTT	23	347618782	-	48286998	48287117	acttgtgaggaaataaagaaagttaggcTGAGGGGCAGAGAGCGAGACTTTtctattttccaaaAGCTCGGTCTGAGGCCCCTCAGTcttgcttcctaccccgcgcttgagtttctcccc	11	ssc-mir-423,bta-mir-423,eca-mir-423,cfa-mir-423a,hsa-mir-423,ggo-mir-423,ptr-mir-423,ppy-mir-423,cgr-mir-423,mmu-mir-423,rno-mir-423,	ssc-mir-423	aagttaggcTGAGGGGCAGAGAGCGAGACTTTtctattttccaaaAGCTCGGTCTGAGGCCCCTCAGTcttgcttcctac	ssc-miR-423-5p	TGAGGGGCAGAGAGCGAGACTTT	5'	Yes	gp1a	(((((((.((......((.(((..((((((((((((..(((.((((.(((((.........))))))))).)))...))))))))))))..))).))...)).)))..))))........	112	50.8	-45.4	0.7	3133	3236	2919.95	3472.1	middle	2.06e-58	3.93e-58
106	191	ssc-miR-423-3p	AGCTCGGTCTGAGGCCCCTCAGT	23	347618782	-	48286998	48287117	acttgtgaggaaataaagaaagttaggcTGAGGGGCAGAGAGCGAGACTTTtctattttccaaaAGCTCGGTCTGAGGCCCCTCAGTcttgcttcctaccccgcgcttgagtttctcccc	11	ssc-mir-423,bta-mir-423,eca-mir-423,cfa-mir-423a,hsa-mir-423,ggo-mir-423,ptr-mir-423,ppy-mir-423,cgr-mir-423,mmu-mir-423,rno-mir-423,	ssc-mir-423	aagttaggcTGAGGGGCAGAGAGCGAGACTTTtctattttccaaaAGCTCGGTCTGAGGCCCCTCAGTcttgcttcctac	ssc-miR-423-3p	AGCTCGGTCTGAGGCCCCTCAGT	3'	Yes	gp1a	(((((((.((......((.(((..((((((((((((..(((.((((.(((((.........))))))))).)))...))))))))))))..))).))...)).)))..))))........	112	50.8	-45.4	0.7	19944	18084	18587.8	19403.4	high	0	1.11e-154
109	196	ssc-miR-17-5p	CAAAGTGCTTACAGTGCAGGTAG	23	347618783	+	66610056	66610140	gtcagaataatgtCAAAGTGCTTACAGTGCAGGTAGtgataatgtgcatctACTGCAGTGAAGGCACTTGTAGCattatggtgac	10	ssc-mir-17,bta-mir-17,eca-mir-17,cfa-mir-17,ppy-mir-17,cgr-mir-17,mmu-mir-17,rno-mir-17-1,mdo-mir-17,oan-mir-17,	ssc-mir-17	gaataatgtCAAAGTGCTTACAGTGCAGGTAGtgataatgtgcatctACTGCAGTGAAGGCACTTGTAGcattatgg	ssc-miR-17-5p	CAAAGTGCTTACAGTGCAGGTAG	5'	Yes	gp1a	((((..(((((((..((((((((.((.(((((.(((((........)).)))))))).)).))))))))...)))))))..))))	85	42.4	-34.6	1	1101	4407.5	1026.13	4729.07	middle	0	0
109	197	ssc-miR-17-3p_R+1	ACTGCAGTGAAGGCACTTGTAGA	23	347618783	+	66610056	66610140	gtcagaataatgtCAAAGTGCTTACAGTGCAGGTAGtgataatgtgcatctACTGCAGTGAAGGCACTTGTAGCattatggtgac	10	ssc-mir-17,bta-mir-17,eca-mir-17,cfa-mir-17,ppy-mir-17,cgr-mir-17,mmu-mir-17,rno-mir-17-1,mdo-mir-17,oan-mir-17,	ssc-mir-17	gaataatgtCAAAGTGCTTACAGTGCAGGTAGtgataatgtgcatctACTGCAGTGAAGGCACTTGTAGcattatgg	ssc-miR-17-3p	ACTGCAGTGAAGGCACTTGTAG	3'	Diff	gp1a	((((..(((((((..((((((((.((.(((((.(((((........)).)))))))).)).))))))))...)))))))..))))	85	42.4	-34.6	1	316	343	294.512	368.025	middle	5.77e-09	4.73e-09
110	198	ssc-miR-18a_R+1	TAAGGTGCATCTAGTGCAGATAG	23	347618783	+	66610192	66610286	tgagtgctttttgttcTAAGGTGCATCTAGTGCAGATAGtgaagtagattagcatctACTGCCCTAAGTGCTCCTTCTGGcataagaagttatgt	6	ssc-mir-18a,bta-mir-18a,eca-mir-18a,cgr-mir-18a,mmu-mir-18a,mdo-mir-18,	ssc-mir-18a	gtgctttttgttcTAAGGTGCATCTAGTGCAGATAgtgaagtagattagcatctactgccctaagtgctccttctggcataagaagttatgt	ssc-miR-18a	TAAGGTGCATCTAGTGCAGATA	5'	Diff	gp1a	.....(((((((((.((((((.(((..(((.((((.(((....((......))..))))))).)))..))).)))..))).))))))))).....	85	41.1	-27.5	0.7	61	262	56.8519	281.116	middle	6.45e-47	4.12e-49
110	199	cgr-miR-18a-3p	ACTGCCCTAAGTGCTCCTTCTGG	23	347618783	+	66610192	66610286	tgagtgctttttgttcTAAGGTGCATCTAGTGCAGATAGtgaagtagattagcatctACTGCCCTAAGTGCTCCTTCTGGcataagaagttatgt	6	ssc-mir-18a,bta-mir-18a,eca-mir-18a,cgr-mir-18a,mmu-mir-18a,mdo-mir-18,	cgr-mir-18a	gtgctgagtgctttttgttcTAAGGTGCATCTAGTGCAGATAGtgaagtagactagcatctACTGCCCTAAGTGCTCCTTCTGGcataagaagttatgtcgtc	cgr-miR-18a-3p	ACTGCCCTAAGTGCTCCTTCTGG	3'	Yes	gp1a	.....(((((((((.((((((.(((..(((.((((.(((....((......))..))))))).)))..))).)))..))).))))))))).....	85	41.1	-27.5	0.7	122	174	113.704	186.695	middle	4.83e-10	3.96e-10
111	200	ssc-miR-19a	TGTGCAAATCTATGCAAAACTGA	23	347618783	+	66610343	66610424	gcagtcctctgttagttttgcatagttgcactacaagaagaatgtagtTGTGCAAATCTATGCAAAACTGAtggtggcctgc	9	ssc-mir-19a,eca-mir-19a,cfa-mir-19a,mne-mir-19a,age-mir-19a,cgr-mir-19a,mmu-mir-19a,rno-mir-19a,mdo-mir-19a,	ssc-mir-19a	gcagtcctctgttagttttgcatagttgcactacaagaagaatgtagtTGTGCAAATCTATGCAAAACTGAtggtggcctgc	ssc-miR-19a	TGTGCAAATCTATGCAAAACTGA	3'	Yes	gp1a	((((.((.(..((((((((((((((((((((((((.......))))...))))))..))))))))))))))..).)).))))	82	42.7	-39	1.1	484	1631.5	451.087	1750.54	middle	0	4.06e-251
112	201	ssc-miR-20a_R+2	TAAAGTGCTTATAGTGCAGGTAGA	24	347618783	+	66610503	66610600	gacagcttctgtagcacTAAAGTGCTTATAGTGCAGGTAGTgtttagttatctACTGCATTATGAGCACTTAAAGTactgctagctgtagaactccag	7	ssc-mir-20a,cfa-mir-20a,lca-mir-20,mmu-mir-20a,rno-mir-20a,mdo-mir-20,oan-mir-20a-2,	ssc-mir-20a	gtagcacTAAAGTGCTTATAGTGCAGGTAgtgtttagttatctactgcattatgagcacttaaagtactgc	ssc-miR-20a	TAAAGTGCTTATAGTGCAGGTA	5'	Diff	gp1a	.((((((...((((.(((.(((((((((((((((((.(((((......)).))))))))))))))))))))..))).)))).))))))..........	87	40.8	-40.1	1	814	4668.5	758.647	5009.12	middle	0	0
112	202	mmu-miR-20a-3p_R+1_1ss10CT	ACTGCATTATGAGCACTTAAAGT	23	347618783	+	66610503	66610600	gacagcttctgtagcacTAAAGTGCTTATAGTGCAGGTAGTgtttagttatctACTGCATTATGAGCACTTAAAGTactgctagctgtagaactccag	7	ssc-mir-20a,cfa-mir-20a,lca-mir-20,mmu-mir-20a,rno-mir-20a,mdo-mir-20,oan-mir-20a-2,	mmu-mir-20a	gtgtgatgtgacagcttctgtagcacTAAAGTGCTTATAGTGCAGGTAGtgtgtagccatctACTGCATTACGAGCACTTAAAGtactgccagctgtagaactccag	mmu-miR-20a-3p	ACTGCATTACGAGCACTTAAAG	3'	Diff	gp1a	.((((((...((((.(((.(((((((((((((((((.(((((......)).))))))))))))))))))))..))).)))).))))))..........	87	40.8	-40.1	1	14	26	13.048	27.897	middle	0.0021495	0.00167003
113	203	cgr-miR-19b-5p	AGTTTTGCAGGTTTGCATCCAGC	23	347618783	+	66610640	66610726	cactgttctatggttAGTTTTGCAGGTTTGCATCCAGCtgtgtgatattctgcTGTGCAAATCCATGCAAAACTGActgtggtagtg	8	ssc-mir-19b-1,bta-mir-19b,eca-mir-19b,cfa-mir-19b-1,lca-mir-19b-1,cgr-mir-19b,mmu-mir-19b-1,mdo-mir-19b,	cgr-mir-19b	gtctatggttAGTTTTGCAGGTTTGCATCCAGCtgtataatactctgcTGTGCAAATCCATGCAAAACTGActgtggtgg	cgr-miR-19b-5p	AGTTTTGCAGGTTTGCATCCAGC	5'	Yes	gp1a	(((((..(((..((((((((((((((((((((..((((.............)))))))))).)).))))))))))))..))))))))	87	43.7	-38.3	1	13	21	12.116	22.5322	middle	0.014071	0.00876485
113	204	ssc-miR-19b	TGTGCAAATCCATGCAAAACTGA	23	347618783	+	66610640	66610726	cactgttctatggttAGTTTTGCAGGTTTGCATCCAGCtgtgtgatattctgcTGTGCAAATCCATGCAAAACTGActgtggtagtg	8	ssc-mir-19b-1,bta-mir-19b,eca-mir-19b,cfa-mir-19b-1,lca-mir-19b-1,cgr-mir-19b,mmu-mir-19b-1,mdo-mir-19b,	ssc-mir-19b-1	ctgttctatggttagttttgcaggtttgcatccagctgtgtgatattctgcTGTGCAAATCCATGCAAAACTGActgtgg	ssc-miR-19b	TGTGCAAATCCATGCAAAACTGA	3'	Yes	gp1a	(((((..(((..((((((((((((((((((((..((((.............)))))))))).)).))))))))))))..))))))))	87	43.7	-38.3	1	4020	4590	3746.64	4924.89	middle	0	2.45e-120
114	206	ssc-miR-92a	TATTGCACTTGTCCCGGCCTGT	22	347618783	+	66610748	66610846	ggaaaatcaaacccctttctacacAGGTTGGGATCGGTTGCAATGCTgtgtttctgtatggTATTGCACTTGTCCCGGCCTGTtgagtttggtggggat	9	ssc-mir-92a-1,bta-mir-92a-1,eca-mir-92a,cfa-mir-92a-1,cgr-mir-92a,mmu-mir-92a-1,rno-mir-92a-1,mdo-mir-92,oan-mir-92a-2,	ssc-mir-92a-1	ctttctacacaggttgggatcggttgcaatgctgtgtttctgtatggTATTGCACTTGTCCCGGCCTGTtgagtttggtg	ssc-miR-92a	TATTGCACTTGTCCCGGCCTGT	3'	Yes	gp1a	...........((((...((..(((((..(((((..(.((((((((..((......))..)))))))))..)))))..)))))..))......))))..	86	48.5	-41.6	0.9	20856	18496.3	19437.8	19845.8	high	0	3.36e-135
116	209	ssc-miR-7	TGGAAGACTAGTGATTTTGTTGTT	24	347618784	+	35113306	35113452	ttatacagagcctgtagaaaatatagaagattcagtggatgttggtctagttctgtgTGGAAGACTAGTGATTTTGTTGTTtttagataactaaatcgaCAACAAATCACAGTCTGCCATAtggcacaggccatgcctctacaggac	13	ssc-mir-7-2,bta-mir-7-2,eca-mir-7-3,cfa-mir-7-1,hsa-mir-7-1,ptr-mir-7-1,mml-mir-7-1,sla-mir-7,mmu-mir-7a-1,rno-mir-7a-1,mdo-mir-7,sha-mir-7,oan-mir-7-1,	ssc-mir-7-2	tggatgttggtctagttctgtgTGGAAGACTAGTGATTTTGTTGTTtttagataactaaatcgacaacaaatcacagtctgccatatggcacaggccatgcctctacag	ssc-miR-7	TGGAAGACTAGTGATTTTGTTGTT	5'	Yes	gp1a	..........((((((((.......((....))...((....((((((.((.(..(((((.(((((.((((.((((((((((((((....)))))..)))))))))))))))))).)))))..).))))))))..))))))))))..	101	39.5	-54	0.9	3701.5	4052.5	3449.79	4348.17	middle	0	1.53e-91
119	214	ssc-miR-181b_R-1	AACATTCATTGCTGTCGGTGGGT	23	347618784	-	26426852	26426961	cctgtgcagagattccttcttaaaaggtcacaatcAACATTCATTGCTGTCGGTGGGTtgaactgtgtagacaagCTCACTGAACAATGAATGCAactgtggccccgcat	10	ssc-mir-181b-1,bta-mir-181b-1,cfa-mir-181b-1,hsa-mir-181b-1,ptr-mir-181b-1,ppy-mir-181b,mml-mir-181b-1,cgr-mir-181b,mmu-mir-181b-1,mdo-mir-181b,	ssc-mir-181b-1	ggtcacaatcAACATTCATTGCTGTCGGTGGGTTgaactgtgtagacaagctcactgaacaatgaatgcaactgtggccc	ssc-miR-181b	AACATTCATTGCTGTCGGTGGGTT	5'	Diff	gp1a	...((((.((((.....))))....(((((((.....(((((((((...((((((((((...((....))...)))))))))).)))))))))....)))))))..))))	79	46.4	-37.6	0.7	11109	10090.2	10353.6	10826.4	high	1.35e-88	3.66e-88
120	216	ssc-miR-181a_R-1	AACATTCAACGCTGTCGGTGAGT	23	347618784	-	26427015	26427122	tgagtttagaggttgcttcagtgAACATTCAACGCTGTCGGTGAGTttggaattcaaatcaaaACCATCGACCGTTGATTGTACCctatggccaaccatcagctccac	9	ssc-mir-181a-1,bta-mir-181a-1,cfa-mir-181a-1,hsa-mir-181a-1,ggo-mir-181a-1,cgr-mir-181a,mmu-mir-181a-1,rno-mir-181a-1,mdo-mir-181a,	ssc-mir-181a-1	gagtttagaggttgcttcagtgAACATTCAACGCTGTCGGTGAGTTtggaattcaaatcaaaaccatcgaccgttgattgtaccctatggccaaccatcagctc	ssc-miR-181a	AACATTCAACGCTGTCGGTGAGTT	5'	Diff	gp1a	.(((((..(((((((((..((...(((.((((((..(((((((.((((.((.......)).))))))))))))))))).)))...))..))).)))).)))))))...	104	45.4	-35	0.7	27884	22341	25987.9	23971	high	1.62e-61	1.67e-61
120	217	hsa-miR-181a-3p	ACCATCGACCGTTGATTGTACC	22	347618784	-	26427015	26427122	tgagtttagaggttgcttcagtgAACATTCAACGCTGTCGGTGAGTttggaattcaaatcaaaACCATCGACCGTTGATTGTACCctatggccaaccatcagctccac	9	ssc-mir-181a-1,bta-mir-181a-1,cfa-mir-181a-1,hsa-mir-181a-1,ggo-mir-181a-1,cgr-mir-181a,mmu-mir-181a-1,rno-mir-181a-1,mdo-mir-181a,	hsa-mir-181a-1	tgagttttgaggttgcttcagtgAACATTCAACGCTGTCGGTGAGTttggaattaaaatcaaaACCATCGACCGTTGATTGTACCctatggctaaccatcatctactcca	hsa-miR-181a-3p	ACCATCGACCGTTGATTGTACC	3'	Yes	gp1a	.(((((..(((((((((..((...(((.((((((..(((((((.((((.((.......)).))))))))))))))))).)))...))..))).)))).)))))))...	104	45.4	-35	0.7	714.5	713	665.913	765.021	middle	3.15e-12	2.37e-12
121	219	ssc-miR-24-3p	TGGCTCAGTTCAGCAGGAACAG	22	347618784	-	31340334	31340413	gacccgccctccgGTGCCTACTGAGCTGATATCAgttctcattttacacacTGGCTCAGTTCAGCAGGAACAGgagtcga	6	ssc-mir-24-2,bta-mir-24-1,cfa-mir-24-1,ptr-mir-24-1,mmu-mir-24-1,mdo-mir-24-1,	ssc-mir-24-2	gacccgccctccgGTGCCTACTGAGCTGATATCAGTtctcattttacacacTGGCTCAGTTCAGCAGGAACAGgagtcga	ssc-miR-24-3p	TGGCTCAGTTCAGCAGGAACAG	3'	Yes	gp1a	....((..((((.((.(((.(((((((((..(((((.............))))).))))))))).))).)).)))).)).	75	53.8	-28	0.7	36178.5	29049	33718.3	31168.4	high	1.06e-81	1.37e-81
125	226	ssc-mir-29b-2-p5	CTGGTTTCACATGGTGGCTTAGA	23	347618785	+	148552438	148552521	cttctggaagCTGGTTTCACATGGTGGCTTAGAtttttccatctttgtatcTAGCACCATTTGAAATCAGTGTTttaggagtaa	5	ssc-mir-29b-2,bta-mir-29b-2,bta-mir-29e,cfa-mir-29b-2,oan-mir-29b-2,	ssc-mir-29b-2	cttctggaagctggtttcacatggtggcttagatttttccatctttgtatcTAGCACCATTTGAAATCAGTGTTttaggagtaa	ssc-mir-29b-2-p5	ctggtttcacatggtggcttaga	5'	Yes	gp1a	(((((..((((((((((((.((((((.((.((((..............)))))))))))).)))))))))).))..)))))...	81	38.1	-30.6	1	121	353	112.772	378.755	middle	2.23e-48	1.54e-49
125	227	ssc-miR-29b	TAGCACCATTTGAAATCAGTGTT	23	347618785	+	148552438	148552521	cttctggaagCTGGTTTCACATGGTGGCTTAGAtttttccatctttgtatcTAGCACCATTTGAAATCAGTGTTttaggagtaa	5	ssc-mir-29b-2,bta-mir-29b-2,bta-mir-29e,cfa-mir-29b-2,oan-mir-29b-2,	ssc-mir-29b-2	cttctggaagctggtttcacatggtggcttagatttttccatctttgtatcTAGCACCATTTGAAATCAGTGTTttaggagtaa	ssc-miR-29b	TAGCACCATTTGAAATCAGTGTT	3'	Yes	gp1a	(((((..((((((((((((.((((((.((.((((..............)))))))))))).)))))))))).))..)))))...	81	38.1	-30.6	1	205.583	378.667	191.603	406.294	middle	2.62e-31	2.66e-31
126	228	cgr-miR-29c-5p	ACCGATTTCTCCTGGTGTTCAGA	23	347618785	+	148552989	148553094	ctggacccatctcttacacaggctgACCGATTTCTCCTGGTGTTCAGAgtctgtttttgtcTAGCACCATTTGAAATCGGTTatgatgtagggggaaaagcagcag	8	ssc-mir-29c,bta-mir-29d,eca-mir-29c-2,cfa-mir-29c-1,ggo-mir-29c,ptr-mir-29c,cgr-mir-29c,oan-mir-29a-2,	cgr-mir-29c	cacaggctgACCGATTTCTCCTGGTGTTCAGAgtctgtttttgtcTAGCACCATTTGAAATCGGTTatgatgtagg	cgr-miR-29c-5p	ACCGATTTCTCCTGGTGTTCAGA	5'	Yes	gp1a	(((......(((((((((((...(((((((((((...((((((((((((.....)))))...)))))))...))))))))))))).))))))))).....)))...	103	47.2	-35.6	0.7	420	952	391.44	1021.46	middle	0	1.02e-100
126	229	ssc-miR-29c_R-1	TAGCACCATTTGAAATCGGTT	21	347618785	+	148552989	148553094	ctggacccatctcttacacaggctgACCGATTTCTCCTGGTGTTCAGAgtctgtttttgtcTAGCACCATTTGAAATCGGTTatgatgtagggggaaaagcagcag	8	ssc-mir-29c,bta-mir-29d,eca-mir-29c-2,cfa-mir-29c-1,ggo-mir-29c,ptr-mir-29c,cgr-mir-29c,oan-mir-29a-2,	ssc-mir-29c	atctcttacacaggctgaccgatttctcctggtgttcagagtctgtttttgtcTAGCACCATTTGAAATCGGTTAtgatgtaggggga	ssc-miR-29c	TAGCACCATTTGAAATCGGTTA	3'	Diff	gp1a	(((......(((((((((((...(((((((((((...((((((((((((.....)))))...)))))))...))))))))))))).))))))))).....)))...	103	47.2	-35.6	0.7	408.083	915.333	380.333	982.117	middle	0	9.29e-96
127	230	ssc-miR-139-5p_R+1	TCTACAGTGCACGTGTCTCCAGT	23	347618785	-	7935614	7935709	ggctcaggtgtatTCTACAGTGCACGTGTCTCCAGTgtggctcggaggcTGGAGACGCGGCCCTGTTGGAGTaacaactgatgccagagtctgcga	7	ssc-mir-139,bta-mir-139,eca-mir-139,cfa-mir-139,ggo-mir-139,ptr-mir-139,cgr-mir-139,	ssc-mir-139	gtgtatTCTACAGTGCACGTGTCTCCAGtgtggctcggaggcTGGAGACGCGGCCCTGTTGGAGTaac	ssc-miR-139-5p	TCTACAGTGCACGTGTCTCCAG	5'	Diff	gp1a	(((((((.((((((((((((.((.((((((((((((...........)))))))))))))).)))).)))))).)).)))).)))...........	85	58.3	-45.6	0.8	1749	2392	1630.07	2566.52	middle	0	1.49e-106
128	233	ssc-miR-326_R+1	CCTCTGGGCCCTTCCTCCAGT	21	347618785	-	10800189	10800290	GGAGCCTCGTCTGTCTGTTGGGCTggaggcagggcctttgtgcaggcgggttgtgctcagatcgCCTCTGGGCCCTTCCTCCAGCccagaggcggattcacc	9	ssc-mir-326,bta-mir-326,eca-mir-326,cfa-mir-326,hsa-mir-326,ggo-mir-326,ptr-mir-326,mmu-mir-326,rno-mir-326,	ssc-mir-326	tctgtctgttgggctggaggcagggcctttgtgcaggcgggttgtgctcagatcgCCTCTGGGCCCTTCCTCCAGcccagaggcggattca	ssc-miR-326	CCTCTGGGCCCTTCCTCCAG	3'	Diff	gp1a	........((((((((.((((((((((((.(((((((......(((((..(((....)))..)))))..))))))).)))))))))))))))))))).....	89	65.7	-60.3	0.9	307	1348	286.124	1446.35	middle	0	4.26e-249
130	236	ssc-miR-34c	AGGCAGTGTAGTTAGCTGATTGC	23	347618785	-	44166853	44166960	tttctgtgagtctagttactAGGCAGTGTAGTTAGCTGATTGCtgataaaaccAATCACTAACCACACGGCCAGGtaaaaagatttgggaattcatccaaatgagctg	10	ssc-mir-34c-1,ssc-mir-34c-2,bta-mir-34c,cfa-mir-34c,hsa-mir-34c,ggo-mir-34c,ptr-mir-34c,mml-mir-34c,cgr-mir-34c,mmu-mir-34c,	ssc-mir-34c-2	tctagttactAGGCAGTGTAGTTAGCTGATTGCtgataaaaccaatcactaaccacacggccaggtaaaaagat	ssc-miR-34c	AGGCAGTGTAGTTAGCTGATTGC	5'	Yes	gp1a	.......((((((..((((..(((.((((.(((((.((((((..........))))))))))).)))).)))..))))..))))))(((......)))..........	79	40.7	-33.3	0.8	190	436	177.08	467.811	middle	3.22e-47	7.29e-48
132	240	ssc-let-7a	TGAGGTAGTAGGTTGTATAGTT	22	347618785	-	54378025	54378157	gccattgtgactgcatgttcccaggtTGAGGTAGTAGGTTGTATAGTTtagaattgtatcaagggagataaCTGTACAGCCTCCTAGCTTTCCttgggtcttgcacaaagcaacatgctgagaaagatcatga	9	ssc-let-7a-1,bta-let-7a-2,cfa-let-7a-2,ptr-let-7a-2,mml-let-7a-2,mmu-let-7a-2,rno-let-7a-2,mdo-let-7a-2,sha-let-7a,	ssc-let-7a-1	cccaggtTGAGGTAGTAGGTTGTATAGTTtagaattgtatcaagggagataactgtacagcctcctagctttccttgggt	ssc-let-7a	TGAGGTAGTAGGTTGTATAGTT	5'	Yes	gp1a	....(..(((.((((....((((((..(((.(((.((((((((((((.........((((......)))))))))))))))).))).)))..))))))...))))...(((.....)))........)))..)	94	43.6	-44.2	0.8	313156	288905	291861	309984	high	0	0
132	241	mmu-let-7a-2-3p_R+1	CTGTACAGCCTCCTAGCTTTCC	22	347618785	-	54378025	54378157	gccattgtgactgcatgttcccaggtTGAGGTAGTAGGTTGTATAGTTtagaattgtatcaagggagataaCTGTACAGCCTCCTAGCTTTCCttgggtcttgcacaaagcaacatgctgagaaagatcatga	9	ssc-let-7a-1,bta-let-7a-2,cfa-let-7a-2,ptr-let-7a-2,mml-let-7a-2,mmu-let-7a-2,rno-let-7a-2,mdo-let-7a-2,sha-let-7a,	mmu-let-7a-2	ctgcatgttcccaggtTGAGGTAGTAGGTTGTATAGTTtagagttacatcaagggagataaCTGTACAGCCTCCTAGCTTTCcttgggacttgcac	mmu-let-7a-2-3p	CTGTACAGCCTCCTAGCTTTC	3'	Diff	gp1a	....(..(((.((((....((((((..(((.(((.((((((((((((.........((((......)))))))))))))))).))).)))..))))))...))))...(((.....)))........)))..)	94	43.6	-44.2	0.8	3	10	2.796	10.7296	middle	0.0095251	0.00995236
138	251	ssc-miR-95_R-1	TTCAACGGGTATTTATTGAGC	21	347618786	+	4277238	4277318	aacacagtgggcgctcaataaatgtttgttgaattgagatgcgttaaaTTCAACGGGTATTTATTGAGCacccactctgtg	6	ssc-mir-95,bta-mir-95,eca-mir-95,cfa-mir-95,hsa-mir-95,ppa-mir-95,	ssc-mir-95	aacacagtgggcgctcaataaatgtttgttgaattgagatgcgttaaaTTCAACGGGTATTTATTGAGCAcccactctgtg	ssc-miR-95	TTCAACGGGTATTTATTGAGCA	3'	Diff	gp1a	.(((.((((((.((((((((((((..(((((((((...........)))))))))..)))))))))))).)))))).))).	79	40.7	-41.6	1.3	2289	1923	2133.35	2063.3	middle	2.4e-10	1.49e-10
139	252	hsa-miR-574-5p	TGAGTGTGTGTGTGTGAGTGTGT	23	347618786	+	31672439	31672541	gcgcggccgagggccctgcgtgggtgcgggcgtgTGAGTGTGTGTGTGTGAGTGTGTgtcgctccgggtcCACGCTCATGCACACACCCACAcgcccgcactc	5	ssc-mir-574,cfa-mir-574,hsa-mir-574,ggo-mir-574,mmu-mir-574,	hsa-mir-574	gggacctgcgtgggtgcgggcgtgTGAGTGTGTGTGTGTGAGTGTGTgtcgctccgggtcCACGCTCATGCACACACCCACAcgcccacactcagg	hsa-miR-574-5p	TGAGTGTGTGTGTGTGAGTGTGT	5'	Yes	gp1a	((((((((...))))..))))(((((((((((((((...(((((((..((((((((..((......))..))))))))..))))))).)))))))))))))))	82	69.9	-70.7	1	273	539	254.436	578.326	middle	2.68e-48	1.22e-48
139	253	ssc-miR-574	CACGCTCATGCACACACCCACA	22	347618786	+	31672439	31672541	gcgcggccgagggccctgcgtgggtgcgggcgtgTGAGTGTGTGTGTGTGAGTGTGTgtcgctccgggtcCACGCTCATGCACACACCCACAcgcccgcactc	5	ssc-mir-574,cfa-mir-574,hsa-mir-574,ggo-mir-574,mmu-mir-574,	ssc-mir-574	tgggtgcgggcgtgtgagtgtgtgtgtgtgagtgtgtgtcgctccgggtcCACGCTCATGCACACACCCACAcgcccgca	ssc-miR-574	CACGCTCATGCACACACCCACA	3'	Yes	gp1a	((((((((...))))..))))(((((((((((((((...(((((((..((((((((..((......))..))))))))..))))))).)))))))))))))))	82	69.9	-70.7	1	7730	14367	7204.35	15415.2	high	0	0
145	262	ssc-miR-345-5p_R+1	GCTGACTCCTAGTCCAGTGCT	21	347618787	+	128658296	128658390	cccaaacccaggtctGCTGACTCCTAGTCCAGTGCTtgtgatggctggtgggcCCTGAACTAGGGGTCTGGAGGcctgggtttgcatttcgccag	6	ssc-mir-345-1,ssc-mir-345-2,bta-mir-345,eca-mir-345,cfa-mir-345,cgr-mir-345,	ssc-mir-345-2	acccaggtctGCTGACTCCTAGTCCAGTGCttgtgatggctggtgggCCCTGAACTAGGGGTCTGGAGgcctgggttt	ssc-miR-345-5p	GCTGACTCCTAGTCCAGTGC	5'	Diff	gp1a	..(((((((((((((.((((((((((((.(((.(((..(........)..))).))).)))))))))).)))))))))))))))...........	82	60	-49.8	0.9	27	283	25.164	303.648	middle	7.67e-69	3.47e-77
145	263	ssc-miR-345-3p_L-1R+1	CCTGAACTAGGGGTCTGGAGT	21	347618787	+	128658296	128658390	cccaaacccaggtctGCTGACTCCTAGTCCAGTGCTtgtgatggctggtgggcCCTGAACTAGGGGTCTGGAGGcctgggtttgcatttcgccag	6	ssc-mir-345-1,ssc-mir-345-2,bta-mir-345,eca-mir-345,cfa-mir-345,cgr-mir-345,	ssc-mir-345-2	acccaggtctGCTGACTCCTAGTCCAGTGCttgtgatggctggtgggCCCTGAACTAGGGGTCTGGAGgcctgggttt	ssc-miR-345-3p	CCCTGAACTAGGGGTCTGGAG	3'	Diff	gp1a	..(((((((((((((.((((((((((((.(((.(((..(........)..))).))).)))))))))).)))))))))))))))...........	82	60	-49.8	0.9	49	72	45.6679	77.2532	middle	3.5104e-05	3.41e-05
147	266	ssc-miR-136_R-1	ACTCCATTTGTTTTGATGATGG	22	347618787	+	132079189	132079280	ttggatgagccctcggaggACTCCATTTGTTTTGATGATGGattcttacgctcCATCATCGTCTCAAATGAGTCTtcagagggttctatcat	9	ssc-mir-136,bta-mir-136,oar-mir-136,eca-mir-136,cfa-mir-136,hsa-mir-136,mml-mir-136,mmu-mir-136,rno-mir-136,	ssc-mir-136	tgagccctcggaggACTCCATTTGTTTTGATGATGGAttcttacgctccatcatcgtctcaaatgagtcttcagagggttct	ssc-miR-136	ACTCCATTTGTTTTGATGATGGA	5'	Diff	gp1a	...(((((((((((.(((((((.((((((...((((((((((.........))))))))))...))))))))))))).)))))))).)))..	87	44.6	-48.1	1.2	11	29	10.252	31.1159	middle	6.2845e-05	4.65e-05
148	268	hsa-miR-127-5p	CTGAAGCTCAGAGGGCTCTGAT	22	347618787	+	132099535	132099660	gtaaaagccctcgctctgatcgctgtctccagcctgCTGAAGCTCAGAGGGCTCTGATtcagaaagatcaTCGGATCCGTCTGAGCTTGGCTggtcggaagtctcctcatctgcttccttcgggtt	9	ssc-mir-127,bta-mir-127,oar-mir-127,eca-mir-127,cfa-mir-127,hsa-mir-127,ggo-mir-127,mml-mir-127,rno-mir-127,	hsa-mir-127	tgtgatcactgtctccagcctgCTGAAGCTCAGAGGGCTCTGATtcagaaagatcaTCGGATCCGTCTGAGCTTGGCTggtcggaagtctcatcatc	hsa-miR-127-5p	CTGAAGCTCAGAGGGCTCTGAT	5'	Yes	gp1a	.....(((((..................((((((.....(((((((((.((.((((((((.....))..)))))).)).)))))))))))))))..((((((..........))))))...)))))	66	54.8	-47.4	0.7	26	40	24.232	42.9184	middle	0.0012208	0.000831622
148	269	ssc-miR-127	TCGGATCCGTCTGAGCTTGGCT	22	347618787	+	132099535	132099660	gtaaaagccctcgctctgatcgctgtctccagcctgCTGAAGCTCAGAGGGCTCTGATtcagaaagatcaTCGGATCCGTCTGAGCTTGGCTggtcggaagtctcctcatctgcttccttcgggtt	9	ssc-mir-127,bta-mir-127,oar-mir-127,eca-mir-127,cfa-mir-127,hsa-mir-127,ggo-mir-127,mml-mir-127,rno-mir-127,	ssc-mir-127	atcgctgtctccagcctgctgaagctcagagggctctgattcagaaagatcaTCGGATCCGTCTGAGCTTGGCTggtcgg	ssc-miR-127	TCGGATCCGTCTGAGCTTGGCT	3'	Yes	gp1a	.....(((((..................((((((.....(((((((((.((.((((((((.....))..)))))).)).)))))))))))))))..((((((..........))))))...)))))	66	54.8	-47.4	0.7	1516	2025	1412.91	2172.75	middle	7.93e-86	2.03e-85
152	276	ssc-miR-493-3p	TGAAGGTCTACTGTGTGCCAGG	22	347618787	-	132069387	132069497	ggggctcactctggcccccagggccTTGTACATGGTAGGCTTTCATTcattcgtttgcacatgcggTGAAGGTCTACTGTGTGCCAGGccctgtgccaggcatcaagtaaa	9	ssc-mir-493,bta-mir-493,oar-mir-493,eca-mir-493b,cfa-mir-493,hsa-mir-493,ggo-mir-493,mmu-mir-493,rno-mir-493,	ssc-mir-493	ccccagggccTTGTACATGGTAGGCTTTCATTcattcgtttgcacatgcggTGAAGGTCTACTGTGTGCCAGGccctgtgcca	ssc-miR-493-3p	TGAAGGTCTACTGTGTGCCAGG	3'	Yes	gp1a	((((((......))))))((((((((.(((((..((((((((((((.....(((........)))))))))))))))..))))).))))))))..................	75	55.9	-54.7	0.9	2	14	1.864	15.0214	middle	0.00022109	0.000232046
153	277	ssc-miR-769-5p_R+1	TGAGACCTCTGGGTTCTGAGCT	22	347618788	+	47579820	47579920	attcctgcgctctgaccTGAGACCTCTGGGTTCTGAGCTgtgatgttgcttccaagcTGGGATCTCTGGGGTCTTGGTTcagggtcggggcctctgggttc	3	ssc-mir-769,hsa-mir-769,ggo-mir-769,	ssc-mir-769	tgcgctctgaccTGAGACCTCTGGGTTCTGAGCtgtgatgttgcttccaagCTGGGATCTCTGGGGTCTTGGTTcagggt	ssc-miR-769-5p	TGAGACCTCTGGGTTCTGAGC	5'	Diff	gp1a	..(((((.(((((((.(..(((((((.(((((((.((((..((.......))..)))))))))))..)))))))..).))))))))))))...........	88	58.4	-43.1	0.7	135	332	125.82	356.223	middle	4.4e-39	1.4e-39
153	278	ssc-miR-769-3p_L-1	TGGGATCTCTGGGGTCTTGGTT	22	347618788	+	47579820	47579920	attcctgcgctctgaccTGAGACCTCTGGGTTCTGAGCTgtgatgttgcttccaagcTGGGATCTCTGGGGTCTTGGTTcagggtcggggcctctgggttc	3	ssc-mir-769,hsa-mir-769,ggo-mir-769,	ssc-mir-769	tgcgctctgaccTGAGACCTCTGGGTTCTGAGCtgtgatgttgcttccaagCTGGGATCTCTGGGGTCTTGGTTcagggt	ssc-miR-769-3p	CTGGGATCTCTGGGGTCTTGGTT	3'	Diff	gp1a	..(((((.(((((((.(..(((((((.(((((((.((((..((.......))..)))))))))))..)))))))..).))))))))))))...........	88	58.4	-43.1	0.7	28	45	26.096	48.2832	middle	0.00034702	0.000294405
154	280	ssc-mir-99b-p3	CAAGCTCGTGTCTGTGGGTCCGT	23	347618788	+	51858217	51858286	ggcaccCACCCGTAGAACCGACCTTGCGgggccttcgccgcacaCAAGCTCGTGTCTGTGGGTCCGTgtc	3	ssc-mir-99b,cfa-mir-99b,ptr-mir-99b,	ssc-mir-99b	ggcaccCACCCGTAGAACCGACCTTGCGgggccttcgccgcacacaagctcgtgtctgtgggtccgtgtc	ssc-mir-99b-p3	caagctcgtgtctgtgggtccgt	3'	Yes	gp1a	(((((..((((..(((..(((.(((((((((...)).)))))....)).)))..)))..))))..)))))	70	67.1	-28.8	0.6	230	216	214.36	231.759	middle	0.0011591	0.000644938
155	281	ssc-let-7e	TGAGGTAGGAGGTTGTATAGTT	22	347618788	+	51858365	51858473	acctgccgcgcgccccgggcTGAGGTAGGAGGTTGTATAGTTgaggaggacacccacggagatcaCTATACGGCCTCCTAGCTTTCCccaggctgcgccctgcacggga	7	ssc-let-7e,bta-let-7e,eca-let-7e,cfa-let-7e,ggo-let-7e,ptr-let-7e,mmu-let-7e,	ssc-let-7e	gccccgggcTGAGGTAGGAGGTTGTATAGTTgaggaggacacccacggagatcactatacggcctcctagctttccccag	ssc-let-7e	TGAGGTAGGAGGTTGTATAGTT	5'	Yes	gp1a	.(((((.(((((((..(((..(((.(((((((..(((((((.((...((....)).......)))))))))..))))))).)))..))).))).))))...))).))..	106	64.2	-52.3	0.7	15155.8	14155.7	14125.2	15188.5	high	0	5.98e-147
155	282	mmu-let-7e-3p	CTATACGGCCTCCTAGCTTTCC	22	347618788	+	51858365	51858473	acctgccgcgcgccccgggcTGAGGTAGGAGGTTGTATAGTTgaggaggacacccacggagatcaCTATACGGCCTCCTAGCTTTCCccaggctgcgccctgcacggga	7	ssc-let-7e,bta-let-7e,eca-let-7e,cfa-let-7e,ggo-let-7e,ptr-let-7e,mmu-let-7e,	mmu-let-7e	cgcgccccccgggcTGAGGTAGGAGGTTGTATAGTTgaggaagacacccgaggagatcaCTATACGGCCTCCTAGCTTTCCccaggctgcgcc	mmu-let-7e-3p	CTATACGGCCTCCTAGCTTTCC	3'	Yes	gp1a	.(((((.(((((((..(((..(((.(((((((..(((((((.((...((....)).......)))))))))..))))))).)))..))).))).))))...))).))..	106	64.2	-52.3	0.7	172	168	160.304	180.257	middle	0.0013632	0.000850658
156	283	ssc-miR-125a_R-1	TCCCTGAGACCCTTTAACCTGT	22	347618788	+	51858848	51858933	tgccggcctctgagTCCCTGAGACCCTTTAACCTGTgaggacatccagggtcACAGGTGAGGTTCTTGGGAGCctggcgtccggcc	10	ssc-mir-125a,bta-mir-125a,eca-mir-125a,cfa-mir-125a,hsa-mir-125a,ptr-mir-125a,mml-mir-125a,cgr-mir-125a,mmu-mir-125a,rno-mir-125a,	ssc-mir-125a	ggcctctgagTCCCTGAGACCCTTTAACCTGTGaggacatccagggtcacaggtgaggttcttgggagcctggcgtccgg	ssc-miR-125a	TCCCTGAGACCCTTTAACCTGTG	5'	Diff	gp1a	.(((((...((..(..((..(((.((((..((((((((((....))....)))))))))))).)))..))..)..))...))))).	84	62.8	-40.1	0.7	10997	7982	10249.2	8564.37	middle	0.00080613	0.000420498
158	287	ssc-miR-551a_R+1	GCGACCCACTCTTGGTTTCCG	21	347618788	+	59927687	59927787	ggggaccgcctggtgaccctgGAAATCCAGAGCGGGTGAGGCCTgtctgactgtttctagGCGACCCACTCTTGGTTTCCAtggttgccctggaaaccaca	8	ssc-mir-551a,eca-mir-551a,cfa-mir-551a,hsa-mir-551a,ggo-mir-551a,ptr-mir-551a,ppy-mir-551a,mml-mir-551a,	ssc-mir-551a	tggtgaccctggaaatccagagcgggtgaggcctgtctgactgtttctagGCGACCCACTCTTGGTTTCCatggttgccc	ssc-miR-551a	GCGACCCACTCTTGGTTTCC	3'	Diff	gp1a	.((.....((.((..(((.((((((((.((((.((((...(((((............))))).)))).)))).)))))))).)))..))..))...))...	97	59.4	-44.7	0.7	19	51	17.708	54.721	middle	8.68e-08	7.02e-08
160	289	ssc-miR-186	CAAAGAATTCTCCTTTTGGGCTT	23	347618788	+	131558966	131559047	tgcttataactttcCAAAGAATTCTCCTTTTGGGCTTtatgattttattttaagCCCAAAGGTGAATTTTTTGGGAagtttg	10	ssc-mir-186,bta-mir-186,eca-mir-186,cfa-mir-186,hsa-mir-186,mml-mir-186,cgr-mir-186,mmu-mir-186,rno-mir-186,mdo-mir-186,	ssc-mir-186	tgcttataactttcCAAAGAATTCTCCTTTTGGGCTTtatgattttattttaagcccaaaggtgaattttttgggaagtttg	ssc-miR-186	CAAAGAATTCTCCTTTTGGGCTT	5'	Yes	gp1a	.......(((((((((((((((((.(((((.((((((..............))))))))))).)))))))))))))))))..	73	31.7	-36	1.4	33259	32494	30997.4	34864.8	high	0	0
160	290	hsa-miR-186-3p_L-1R+1	CCCAAAGGTGAATTTTTTGGGA	22	347618788	+	131558966	131559047	tgcttataactttcCAAAGAATTCTCCTTTTGGGCTTtatgattttattttaagCCCAAAGGTGAATTTTTTGGGAagtttg	10	ssc-mir-186,bta-mir-186,eca-mir-186,cfa-mir-186,hsa-mir-186,mml-mir-186,cgr-mir-186,mmu-mir-186,rno-mir-186,mdo-mir-186,	hsa-mir-186	tgcttgtaactttcCAAAGAATTCTCCTTTTGGGCTttctggttttattttaaGCCCAAAGGTGAATTTTTTGGGaagtttgagct	hsa-miR-186-3p	GCCCAAAGGTGAATTTTTTGGG	3'	Diff	gp1a	.......(((((((((((((((((.(((((.((((((..............))))))))))).)))))))))))))))))..	73	31.7	-36	1.4	5	22	4.65999	23.6051	middle	2.7192e-05	2.46e-05
161	292	ssc-miR-101_R+1	TACAGTACTGTGATAACTGAAG	22	347618788	+	135736114	135736196	aggctgccctggcTCAGTTATCACAGTGCTGATGctgtccattctaaaggTACAGTACTGTGATAACTGAAGgatggcagcca	7	ssc-mir-101-2,bta-mir-101-1,eca-mir-101-1,cfa-mir-101-1,hsa-mir-101-1,ggo-mir-101,mdo-mir-101-1,	ssc-mir-101-2	ggctgccctggctcagttatcacagtgctgatgctgtccattctaaaggTACAGTACTGTGATAACTGAAggatggcagcc	ssc-miR-101	TACAGTACTGTGATAACTGAA	3'	Diff	gp1a	.(((((((.....((((((((((((((((((.((((............)))))))))))))))))))))).....))))))).	81	49.4	-47.1	1.1	6007.5	6483.5	5598.98	6956.54	middle	0	1.87e-137
162	293	ssc-mir-4332-p5_1ss19CA	GGGTGGGGCCGGCGGGGGA	19	347618788	-	870446	870551	cggcggggggtgtcgcgggggtgggcgggcggggccggGGGTGGGGCCGGCGGGGGAccgcccccCGGTCGGCGTCCACGGCcgccgccgggcgcatttccaccgc	1	ssc-mir-4332,	ssc-mir-4332	cggcggggggtgtcgcgggggtgggcgggctggggccgggggtggggccggcgggggcacgacccccggtcggcgtcCACGGCCGCCGCCGGGCGCCtttccaccgc	ssc-mir-4332-p5	gggtggggccggcgggggc	5'	Diff	gp1a	(((.((..((((((.(((.(((((.((((((.(((((((((........((((....)))))))))))))..)).)).)).))))).)))))))).)..)).))).	105	87.7	-71.1	0.8	208	339	193.856	363.734	middle	2.62e-23	2.19e-23
162	294	ssc-mir-4332-p3	CGGTCGGCGTCCACGGC	17	347618788	-	870446	870551	cggcggggggtgtcgcgggggtgggcgggcggggccggGGGTGGGGCCGGCGGGGGAccgcccccCGGTCGGCGTCCACGGCcgccgccgggcgcatttccaccgc	1	ssc-mir-4332,	ssc-mir-4332	cggcggggggtgtcgcgggggtgggcgggctggggccgggggtggggccggcgggggcacgacccccggtcggcgtcCACGGCCGCCGCCGGGCGCCtttccaccgc	ssc-mir-4332-p3	cggtcggcgtcCACGGC	3'	Yes	gp1a	(((.((..((((((.(((.(((((.((((((.(((((((((........((((....)))))))))))))..)).)).)).))))).)))))))).)..)).))).	105	87.7	-71.1	0.8	3953	3356	3684.19	3600.86	middle	1.41e-18	9.54e-19
165	299	ssc-miR-429	TAATACTGTCTGGTAATGCCGT	22	347618788	-	58044173	58044254	gccgccgatgggtGTCTTACCAGGCACGGTTAGAtctggttcttctgtcTAATACTGTCTGGTAATGCCGTccattcccggc	3	ssc-mir-429,bta-mir-429,eca-mir-429,	ssc-mir-429	gccgccgatgggtgtcttaccaggcacggttagatctggttcttctgtcTAATACTGTCTGGTAATGCCGTccattcccgg	ssc-miR-429	TAATACTGTCTGGTAATGCCGT	3'	Yes	gp1a	((((..(((((..(..((((((((((..(((((((..((....)).)))))))..))))))))))...)..)))))..))))	82	54.9	-34.4	0.8	3454	6313	3219.12	6773.6	middle	0	0
166	301	ssc-mir-4331-p3	GCATTGCTGTGGCTGTG	17	347618788	-	60130099	60130178	ccatgagctaTGGCGTAGATCACAGACACAGCtcagatctgGCATTGCTGTGGCTGTGgtgtaggccagcagctttgctc	1	ssc-mir-4331,	ssc-mir-4331	ccatgagctatggcgtagatcacagacacagctcagatctggcattgcTGTGGCTGTGGTGTAGGCCAGCagctttgctc	ssc-mir-4331-p3	gcattgcTGTGGCTGTG	3'	Yes	gp1a	....(((((.((((.((.(((((((.((((((..............)))))).))))))).)).))))..))))).....	71	55	-36.3	0.8	78	82	72.6959	87.9828	middle	0.0076775	0.00531245
167	302	ssc-miR-2320-5p_R+1	TGGCACAGGGTCCAGCTGTCGGA	23	347618788	-	60147823	60147903	gctgtccccaTGGCACAGGGTCCAGCTGTCGGCtgtaatacccgatgggtCGATGATGGTCCCTGTGTTTGGggcgagcac	2	ssc-mir-2320,bta-mir-2320,	ssc-mir-2320	gctgtccccaTGGCACAGGGTCCAGCTGTCGGctgtaatacccgatgggtCGATGATGGTCCCTGTGTTTGgggcgagcac	ssc-miR-2320-5p	TGGCACAGGGTCCAGCTGTCGG	5'	Diff	gp1a	(((..(((((...(((((((.(((...(((((((.............)))))))..))).)))))))..)))))..)))..	79	61.7	-39.4	0.8	1790	2648	1668.28	2841.2	middle	0	1.98e-140
167	303	ssc-miR-2320-3p_R+1	CGATGATGGTCCCTGTGTTTGT	22	347618788	-	60147823	60147903	gctgtccccaTGGCACAGGGTCCAGCTGTCGGCtgtaatacccgatgggtCGATGATGGTCCCTGTGTTTGGggcgagcac	2	ssc-mir-2320,bta-mir-2320,	ssc-mir-2320	gctgtccccaTGGCACAGGGTCCAGCTGTCGGctgtaatacccgatgggtCGATGATGGTCCCTGTGTTTGgggcgagcac	ssc-miR-2320-3p	CGATGATGGTCCCTGTGTTTG	3'	Diff	gp1a	(((..(((((...(((((((.(((...(((((((.............)))))))..))).)))))))..)))))..)))..	79	61.7	-39.4	0.8	340	315	316.88	337.983	middle	0.00016886	0.000105515
169	305	ssc-miR-30c-5p_R+1	TGTAAACATCCTACACTCTCAGCT	24	347618788	-	157473588	157473684	gtaaccatgccgtagtgcgTGTAAACATCCTACACTCTCAGCTgtgagctcgaggtggCTGGGAGAGGGTTGTTTACTCCttctgccatggaaaacg	6	ssc-mir-30c-1,bta-mir-30c,eca-mir-30c,cfa-mir-30c-1,ptr-mir-30c-1,mmu-mir-30c-1,	ssc-mir-30c-1	cgtagtgcgTGTAAACATCCTACACTCTCAGCtgtgagctcgaggtggCTGGGAGAGGGTTGTTTACTccttctgccatg	ssc-miR-30c-5p	TGTAAACATCCTACACTCTCAGC	5'	Diff	gp1a	....(((((..((((.....(((((((.(((...((((((((..(.........)..)))))))).))).))))))).....)))))))))......	87	52.6	-34.7	0.7	45707.3	47038.4	42599.2	50470.4	high	0	0
170	307	ssc-miR-30e-5p	TGTAAACATCCTTGACTGGAAGCT	24	347618788	-	157476641	157476742	gggcagtctttgccacTGTAAACATCCTTGACTGGAAGCTgtgaggcgttcccaggagCTTTCAGTCGGATGTTTACAGCggcaggctgccacggtcgtccc	10	ssc-mir-30e,bta-mir-30e,eca-mir-30e,cfa-mir-30e,ggo-mir-30e,ptr-mir-30e,mml-mir-30e,cgr-mir-30e,mmu-mir-30e,oan-mir-30e,	ssc-mir-30e	tttgccacTGTAAACATCCTTGACTGGAAGCTgtgaggcgttcccaggagCTTTCAGTCGGATGTTTACAGCggcaggct	ssc-miR-30e-5p	TGTAAACATCCTTGACTGGAAGCT	5'	Yes	gp1a	.(((((((..((((.((((((((((((..(((((((((((.((.((....))))..))))))))))))))))))))))).)))))))))))..((....)).	90	57.8	-56.8	1	13442.8	16832	12528.7	18060	high	0	0
172	311	ssc-miR-148b-5p	GAAGTTCTGTTATACACTCAGGC	23	347618789	+	20388169	20388277	atcatttccaggcaccattagcatttgaggtGAAGTTCTGTTATACACTCAGGCtgtggctctctgaaagTCAGTGCATCACAGAACTTTGTctcgaaagctttctagc	10	ssc-mir-148b,bta-mir-148b,eca-mir-148b,cfa-mir-148b,hsa-mir-148b,ggo-mir-148b,ptr-mir-148b,cgr-mir-148b,mmu-mir-148b,rno-mir-148b,	ssc-mir-148b	atttgaggtGAAGTTCTGTTATACACTCAGGCtgtggctctctgaaagTCAGTGCATCACAGAACTTTGTctcgaaagct	ssc-miR-148b-5p	GAAGTTCTGTTATACACTCAGGC	5'	Yes	gp1a	...........((......(((.(((((((..(((((((((.((.((((..((((.............)))))))).)).)))))))))..))))))).))).....))	98	44	-33.8	0.7	370	612	344.84	656.652	middle	8.71e-42	7.57e-42
172	312	ssc-miR-148b-3p	TCAGTGCATCACAGAACTTTGT	22	347618789	+	20388169	20388277	atcatttccaggcaccattagcatttgaggtGAAGTTCTGTTATACACTCAGGCtgtggctctctgaaagTCAGTGCATCACAGAACTTTGTctcgaaagctttctagc	10	ssc-mir-148b,bta-mir-148b,eca-mir-148b,cfa-mir-148b,hsa-mir-148b,ggo-mir-148b,ptr-mir-148b,cgr-mir-148b,mmu-mir-148b,rno-mir-148b,	ssc-mir-148b	atttgaggtGAAGTTCTGTTATACACTCAGGCtgtggctctctgaaagTCAGTGCATCACAGAACTTTGTctcgaaagct	ssc-miR-148b-3p	TCAGTGCATCACAGAACTTTGT	3'	Yes	gp1a	...........((......(((.(((((((..(((((((((.((.((((..((((.............)))))))).)).)))))))))..))))))).))).....))	98	44	-33.8	0.7	25824.7	28001.5	24068.6	30044.5	high	0	0
173	314	cgr-let-7i_R+1	CTGCGCAAGCTACTGCCTTGCT	22	347618789	+	30021209	30021316	cccgacaccatggccctggcTGAGGTAGTAGTTTGTGCTGTTggtcgggttgtgacattgcccgctgtggagataaCTGCGCAAGCTACTGCCTTGCTagtgctggtg	5	ssc-let-7i,bta-let-7i,ggo-let-7i,ptr-let-7i,cgr-let-7i,	cgr-let-7i	tggctgaggtagtagtttgtgctgttggtcgggttgtgacattgcccgctgtggagataaCTGCGCAAGCTACTGCCTTGCtagtgctgg	cgr-let-7i	CTGCGCAAGCTACTGCCTTGC	3'	Diff	gp1a	.....((((..(((.(((((.(((((((((((((((((.(((((.(((((.........)))))))........))).)))))))))))))))))))))).)))))))	103	57.4	-51.9	0.8	87	83	81.0839	89.0557	middle	0.034913	0.0212812
175	317	ssc-miR-615	TCCGAGCCTGGGTCTCCCTCT	21	347618789	-	19690656	19690749	ctcgggaggggcgggagGGGGCTCCCCGGTGCTCGGATCtcgagggtgcttattgttcggTCCGAGCCTGGGTCTCCCTCTcccccccaccccc	8	ssc-mir-615,bta-mir-615,eca-mir-615,hsa-mir-615,ptr-mir-615,mml-mir-615,cgr-mir-615,mmu-mir-615,	ssc-mir-615	gggaggggcgggagggggctccccggtgctcggatctcgagggtgcttattgttcggTCCGAGCCTGGGTCTCCCTCTcccccccacc	ssc-miR-615	TCCGAGCCTGGGTCTCCCTCT	3'	Yes	gp1a	...(((.((((.(((((((((...(((((.(((((((((.(((..(...)..)))...))))))))))))))...))))))))))))).)))..	89	72.3	-60	0.9	3	17	2.796	18.2403	middle	9.0501e-05	0.000113117
177	320	ssc-miR-135	TATGGCTTTTTATTCCTATGTGA	23	347618789	-	90552018	90552148	caagataaattcactctagtgcttTATGGCTTTTTATTCCTATGTGAtagtaataaagtctcaTGTAGGGATGGAAGCCATGAAAtacattgtgaaaaatcatcaaccaagaaggggccatcaggatagaa	7	ssc-mir-135-2,cfa-mir-135a-2,lla-mir-135-2,mmu-mir-135a-2,mdo-mir-135a,sha-mir-135a,oan-mir-135a,	ssc-mir-135-2	agataaattcactctagtgcttTATGGCTTTTTATTCCTATGTGAtagtaataaagtctcatgtagggatggaagccatgaaatacattgtgaaaaatca	ssc-miR-135	TATGGCTTTTTATTCCTATGTGA	5'	Yes	gp1a	...(((...(((((....((..(((((((((.(..(((((((..(((.............)))..)))))))..))))))))))..))...)))))..))).....((.....))..((....))......	98	35.9	-34.1	0.7	3	15.5	2.796	16.6309	middle	0.00024801	0.000220389
178	323	ssc-miR-331-3p_R-1	GCCCCTGGGCCTATCCTAGA	20	347618789	-	92224967	92225073	tcccaaggagtttggtttgtttgggtttgtTCTAGGTATGGTCCCAGGGATCccagatcaaaccagGCCCCTGGGCCTATCCTAGAaccaacctaaactcgcgcatc	11	ssc-mir-331,bta-mir-331,eca-mir-331,hsa-mir-331,ggo-mir-331,ptr-mir-331,ppy-mir-331,mml-mir-331,cgr-mir-331,mmu-mir-331,rno-mir-331,	ssc-mir-331	ttgtttgggtttgtTCTAGGTATGGTCCCAGGGATcccagatcaaaccagGCCCCTGGGCCTATCCTAGAAccaacctaa	ssc-miR-331-3p	GCCCCTGGGCCTATCCTAGAA	3'	Diff	gp1a	(((...)))...((((..(((((((((.((((((((.((((.(((((((..(.............)..))))))).)))))))))))).)))))))))..)).))..	93	52.3	-45.8	0.8	703	3443	655.195	3694.2	middle	0	0
179	324	ssc-miR-30d	TGTAAACATCCCCGACTGGAAGCT	24	347618790	+	6713514	6713596	aagtctgttgtTGTAAACATCCCCGACTGGAAGCTgtaagacatagctaagCTTTCAGTCAGATGTTTGCTGCcaccgactct	8	ssc-mir-30d,bta-mir-30d,eca-mir-30d,cfa-mir-30d,hsa-mir-30d,mml-mir-30d,cgr-mir-30d,mmu-mir-30d,	ssc-mir-30d	ctgttgtTGTAAACATCCCCGACTGGAAGCTgtaagacatagctaagctttcagtcagatgtttgctgccaccgactct	ssc-miR-30d	TGTAAACATCCCCGACTGGAAGCT	5'	Yes	gp1a	.((((.((.(..(((((((((...(((((((((((..............))))))))))).)))))))))..).)).))))..	80	45.8	-33.6	0.9	132993	115837	123949	124289	high	0	0
180	327	ssc-miR-30b-3p_R+1	CTGGGAGGTGGATGTTTACTTC	22	347618790	+	6717636	6717724	accgagttttcagttcgTGTAAACATCCTACACTCAGCTgtaatacatggattggCTGGGAGGTGGATGTTTACTTCagctgacttgga	9	ssc-mir-30b,bta-mir-30b,eca-mir-30b,cfa-mir-30b,hsa-mir-30b,ggo-mir-30b,age-mir-30b,cgr-mir-30b,rno-mir-30b,	ssc-mir-30b	tttcagttcgTGTAAACATCCTACACTCAGCTgtaatacatggattggCTGGGAGGTGGATGTTTACTTcagctga	ssc-miR-30b-3p	CTGGGAGGTGGATGTTTACTT	3'	Diff	gp1a	.(((((...((((((...((((((((((.((.(((((((..............)))))))..))))))))))))...))))))))))).	87	44.9	-36.1	0.9	74	82	68.9679	87.9828	middle	0.0030481	0.00205031
184	333	ssc-miR-92b-5p	AGGGACGGGACGCGGTGCAGTGTT	24	347618790	-	103407085	103407201	agcgggatcccgggccccgggcgggcgggAGGGACGGGACGCGGTGCAGTGTTgttctttcccctgccaaTATTGCACTCGTCCCGGCCTCCggcccccccggccccccggcctccc	12	ssc-mir-92b,bta-mir-92b,eca-mir-92b,cfa-mir-92b,hsa-mir-92b,ggo-mir-92b,ptr-mir-92b,ppy-mir-92b,mml-mir-92b,cgr-mir-92b,mmu-mir-92b,rno-mir-92b,	ssc-mir-92b	gcgggcgggAGGGACGGGACGCGGTGCAGTGTTgttctttcccctgccaaTATTGCACTCGTCCCGGCCTCCggcccccc	ssc-miR-92b-5p	AGGGACGGGACGCGGTGCAGTGTT	5'	Yes	gp1a	...((((..(((((..(((((.((((.(((((..(((((((.((((((((((((.............))))))))))))))))))).))))).)))).)))))...)))))..))))	114	76.1	-78.4	0.9	41	45	38.212	48.2832	middle	0.031134	0.0210536
184	334	ssc-miR-92b-3p	TATTGCACTCGTCCCGGCCTCC	22	347618790	-	103407085	103407201	agcgggatcccgggccccgggcgggcgggAGGGACGGGACGCGGTGCAGTGTTgttctttcccctgccaaTATTGCACTCGTCCCGGCCTCCggcccccccggccccccggcctccc	12	ssc-mir-92b,bta-mir-92b,eca-mir-92b,cfa-mir-92b,hsa-mir-92b,ggo-mir-92b,ptr-mir-92b,ppy-mir-92b,mml-mir-92b,cgr-mir-92b,mmu-mir-92b,rno-mir-92b,	ssc-mir-92b	gcgggcgggAGGGACGGGACGCGGTGCAGTGTTgttctttcccctgccaaTATTGCACTCGTCCCGGCCTCCggcccccc	ssc-miR-92b-3p	TATTGCACTCGTCCCGGCCTCC	3'	Yes	gp1a	...((((..(((((..(((((.((((.(((((..(((((((.((((((((((((.............))))))))))))))))))).))))).)))).)))))...)))))..))))	114	76.1	-78.4	0.9	3601	4750.33	3356.13	5096.92	middle	0	2.41e-191
186	337	ssc-miR-339	TCCCTGTCCTCCAGGAGCTCA	21	347618791	+	726707	726789	ggggcagccgccgTCCCTGTCCTCCAGGAGCTCActtaccttgggccgtgAGCTCCTCGAGGCCAGAGCCCgtgtctgcctct	2	ssc-mir-339-1,bta-mir-339a,	ssc-mir-339-1	gcagccgccgTCCCTGTCCTCCAGGAGCTCActtaccttgggccgtgAGCTCCTCGAGGCCAGAGCCCgtgtctgcctct	ssc-miR-339	TCCCTGTCCTCCAGGAGCTCA	5'	Yes	gp1a	(((((((.(((.((..(((.((((.((((((((((...((...))..)))))))))).)))).))).))..))).))))))).	82	68.7	-44.6	0.8	517.833	1048.83	482.62	1125.36	middle	0	6.99e-96
186	338	ssc-miR-339-3p	AGCTCCTCGAGGCCAGAGCCC	21	347618791	+	726707	726789	ggggcagccgccgTCCCTGTCCTCCAGGAGCTCActtaccttgggccgtgAGCTCCTCGAGGCCAGAGCCCgtgtctgcctct	2	ssc-mir-339-1,bta-mir-339a,	ssc-mir-339-1	gcagccgccgTCCCTGTCCTCCAGGAGCTCActtaccttgggccgtgAGCTCCTCGAGGCCAGAGCCCgtgtctgcctct	ssc-miR-339-3p	AGCTCCTCGAGGCCAGAGCCC	3'	Yes	gp1a	(((((((.(((.((..(((.((((.((((((((((...((...))..)))))))))).)))).))).))..))).))))))).	82	68.7	-44.6	0.8	12	21	11.184	22.5322	middle	0.0084806	0.00515182
187	339	ssc-let-7a	TGAGGTAGTAGGTTGTATAGTT	22	347618791	+	44864431	44864530	ttcactgtgggaTGAGGTAGTAGGTTGTATAGTTttagggtcacacccaccactgggagataaCTATACAATCTACTGTCTTTCCtaacgtgatagaaaa	6	ssc-let-7a-2,bta-let-7a-1,ptr-let-7a-1,cgr-let-7a,mmu-let-7a-1,mdo-let-7a-1,	ssc-let-7a-2	cactgtgggaTGAGGTAGTAGGTTGTATAGTTttagggtcacacccaccactgggagataactatacaatctactgtctttcctaacgtgat	ssc-let-7a	TGAGGTAGTAGGTTGTATAGTT	5'	Yes	gp1a	.((((..(((((.(((..((((((((((((((((...(((.....))).((....))....))))))))))))))))..))))))))..)))).......	92	41	-41.3	1	313156	288905	291861	309984	high	0	0
188	341	ssc-let-7f	TGAGGTAGTAGATTGTATAGTT	22	347618791	+	44864795	44864899	attgctctatcagagTGAGGTAGTAGATTGTATAGTTgtggggtagtgattttaccctgttcaggagataaCTATACAATCTATTGCCTTCCCtgaggagtagac	8	ssc-let-7f-2,bta-let-7f-1,eca-let-7f,cfa-let-7f,ggo-let-7f,ptr-let-7f-1,cgr-let-7f,mmu-let-7f-1,	ssc-let-7f-2	tctatcagagTGAGGTAGTAGATTGTATAGTTgtggggtagtgattttaccctgttcaggagataactatacaatctattgccttccctgaggagta	ssc-let-7f	TGAGGTAGTAGATTGTATAGTT	5'	Yes	gp1a	.(((((((.((((...((((((((((((((((((((((((((((((.....))))))).........)))))))))))))))))))))))..)))))))))))..	102	41	-49.5	1.1	188897	179922	176052	193049	high	0	0
189	344	ssc-let-7d-3p	CTATACGACCTGCTGCCTTTCT	22	347618791	+	44867262	44867367	aatgggttcctaggaAGAGGTAGTAGGTTGCATAGTTttagggcagagattttgcccacaaggaggtaaCTATACGACCTGCTGCCTTTCTtagggccttattatt	10	ssc-let-7d,bta-let-7d,eca-let-7d,hsa-let-7d,ptr-let-7d,cgr-let-7d,mmu-let-7d,rno-let-7d,mdo-let-7d,oan-let-7d,	ssc-let-7d	gttcctaggaAGAGGTAGTAGGTTGCATAGTTttagggcagagattttgcccacaaggaggtaaCTATACGACCTGCTGCCTTTCTtagggcctta	ssc-let-7d-3p	CTATACGACCTGCTGCCTTTCT	3'	Yes	gp1a	(((..(..((((((.(((((((((((((((.((((((...(((((((...)))))))..........)))))).)))))))))))))))))))))..)..)))...	103	44.3	-49.1	1	1688	1260	1573.21	1351.93	middle	0.037753	0.0196112
192	349	ssc-miR-365-3p	TAATGCCCCTAAAAATCCTTAT	22	347618791	-	29976222	29976328	gctggttggttaccgcagggaaaatgAGGGACTTTTGGGGGCAGATGTGtttccattccactatcaTAATGCCCCTAAAAATCCTTATtgctcttgcagtattcctc	9	ssc-mir-365-1,bta-mir-365-1,eca-mir-365-2,ggo-mir-365a,ptr-mir-365-1,cgr-mir-365,mmu-mir-365-1,mdo-mir-365,oan-mir-365,	ssc-mir-365-1	cgcagggaaaatgagggacttttgggggcagatgtgtttccattccactatcaTAATGCCCCTAAAAATCCTTATtgctc	ssc-miR-365-3p	TAATGCCCCTAAAAATCCTTAT	3'	Yes	gp1a	.......((.(((.((((((..((((((((..(((((((((((..((((...............)))).))))))))))).))))))))..)))))).)))..))..	98	45.8	-39	0.8	1931.5	1614	1800.16	1731.76	middle	1.6e-08	9.31e-09
193	350	ssc-miR-324	CGCATCCCCTAGGGCATTGGTGT	23	347618791	-	139855111	139855216	ctgagctgactatgcctcccCGCATCCCCTAGGGCATTGGTGTgaagctggagacccACTGCCCCAGGTGCTGCTGGGggttgtagtctgacccgactgagaagaa	9	ssc-mir-324,bta-mir-324,eca-mir-324,cfa-mir-324,ggo-mir-324,ptr-mir-324,cgr-mir-324,mmu-mir-324,rno-mir-324,	ssc-mir-324	ctatgcctcccCGCATCCCCTAGGGCATTGGTGTgaagctggagacccactgccccaggtgctgctgggggttgtagtct	ssc-miR-324	CGCATCCCCTAGGGCATTGGTGT	5'	Yes	gp1a	.......((((((..(((((.(((...(((.(((((.(((.((..........))))).))))).)))...))).)))))..))))))..................	81	60.4	-38.8	0.6	168	360	156.576	386.266	middle	2.34e-36	1.57e-36
193	351	eca-miR-324-3p_L-2R+1	ACTGCCCCAGGTGCTGCTGGT	21	347618791	-	139855111	139855216	ctgagctgactatgcctcccCGCATCCCCTAGGGCATTGGTGTgaagctggagacccACTGCCCCAGGTGCTGCTGGGggttgtagtctgacccgactgagaagaa	9	ssc-mir-324,bta-mir-324,eca-mir-324,cfa-mir-324,ggo-mir-324,ptr-mir-324,cgr-mir-324,mmu-mir-324,rno-mir-324,	eca-mir-324	ctgactatgcctcccCGCATCCCCTAGGGCATTGGTGTaaagctggagacCCACTGCCCCAGGTGCTGCTGGgggttgtagtc	eca-miR-324-3p	CCACTGCCCCAGGTGCTGCTGG	3'	Diff	gp1a	.......((((((..(((((.(((...(((.(((((.(((.((..........))))).))))).)))...))).)))))..))))))..................	81	60.4	-38.8	0.6	219	398	204.108	427.038	middle	3.47e-32	2.46e-32
194	353	ssc-miR-210	CTGTGCGTGTGACAGCGGCTGA	22	347618792	+	339052	339164	gcccgcccggcggtccctccaggcgcagggcAGCCACTGCCCACCGCACACTGcgctgctccggacccaCTGTGCGTGTGACAGCGGCTGAtctgtccctgggcagcgcgacc	10	ssc-mir-210,bta-mir-210,cfa-mir-210,hsa-mir-210,ggo-mir-210,ptr-mir-210,mml-mir-210,cgr-mir-210,mmu-mir-210,rno-mir-210,	ssc-mir-210	gcgcagggcagccactgcccaccgcacactgcgctgctccggacccaCTGTGCGTGTGACAGCGGCTGAtctgtcc	ssc-miR-210	CTGTGCGTGTGACAGCGGCTGA	3'	Yes	gp1a	((((((...))))....((((((..(((..(((((.(((..(((((((((.((..(((...)))...)).)))))).))).))).)))))..)))..))))))....))....	86	74.3	-50.1	0.6	401	674	373.732	723.175	middle	4.2e-47	4.64e-47
199	363	ssc-miR-24-3p	TGGCTCAGTTCAGCAGGAACAG	22	347618792	+	65582174	65582254	ctctgcctcccGTGCCTACTGAGCTGAAACACAgttgatttgtgcagacTGGCTCAGTTCAGCAGGAACAGgagtcaagcc	8	ssc-mir-24-1,bta-mir-24-2,eca-mir-24-1,cfa-mir-24-2,hsa-mir-24-2,mml-mir-24-2,cgr-mir-24,mdo-mir-24-2,	ssc-mir-24-1	ctctgcctcccGTGCCTACTGAGCTGAAACACAGTtgatttgtgcagacTGGCTCAGTTCAGCAGGAACAGg	ssc-miR-24-3p	TGGCTCAGTTCAGCAGGAACAG	3'	Yes	gp1a	...((.((((.((.(((.(((((((((....(((((..........)))))..))))))))).))).)).)))).))....	74	54.3	-30.7	0.7	36178.5	29049	33718.3	31168.4	high	1.06e-81	1.37e-81
200	364	ssc-miR-340	TTATAAAGCAATGAGACTGATT	22	347618792	+	80118847	80118943	tgtacctggtgtgaTTATAAAGCAATGAGACTGATTgtcatatgtcgtttgtgggaTCCGTCTCAGTTACTTTATAGCCatacctggtatcttatac	13	ssc-mir-340-2,ssc-mir-340-1,bta-mir-340,eca-mir-340,cfa-mir-340,hsa-mir-340,ggo-mir-340,ptr-mir-340,ppy-mir-340,mml-mir-340,cgr-mir-340,mmu-mir-340,rno-mir-340,	ssc-mir-340-1	tacctggtgtgaTTATAAAGCAATGAGACTGATTgtcatatgtcgtttgtgggatccgtctcagttactttatagccata	ssc-miR-340	TTATAAAGCAATGAGACTGATT	5'	Yes	gp1a	.(((((.((((((..(((((((...((((((.(((...((((.......))))..))).))))))....)))))))..)))))).))))).......	89	39.2	-33.7	0.9	475	820	442.699	879.828	middle	1.74e-59	1.6e-59
200	365	bta-miR-340	TCCGTCTCAGTTACTTTATAGCC	23	347618792	+	80118847	80118943	tgtacctggtgtgaTTATAAAGCAATGAGACTGATTgtcatatgtcgtttgtgggaTCCGTCTCAGTTACTTTATAGCCatacctggtatcttatac	13	ssc-mir-340-2,ssc-mir-340-1,bta-mir-340,eca-mir-340,cfa-mir-340,hsa-mir-340,ggo-mir-340,ptr-mir-340,ppy-mir-340,mml-mir-340,cgr-mir-340,mmu-mir-340,rno-mir-340,	bta-mir-340	ttgtacctggtgtgattataaagcaatgagactgattgtcatgtgtcgtttgtgggaTCCGTCTCAGTTACTTTATAGCCatacctggtatctta	bta-miR-340	TCCGTCTCAGTTACTTTATAGCC	3'	Yes	gp1a	.(((((.((((((..(((((((...((((((.(((...((((.......))))..))).))))))....)))))))..)))))).))))).......	89	39.2	-33.7	0.9	60	91	55.9199	97.6394	middle	1.52e-06	1.09e-06
201	366	ssc-miR-143-5p_R+1	GGTGCAGTGCTGCATCTCTGGT	22	347618792	+	157344726	157344828	gcgcggcgccctgtcccccagccggaGGTGCAGTGCTGCATCTCTGGTcagctgggagtcTGAGATGAAGCACTGTAGCTCGggaagggagaagctgctctgc	12	ssc-mir-143,bta-mir-143,eca-mir-143,cfa-mir-143,hsa-mir-143,ppa-mir-143,mml-mir-143,cgr-mir-143,mmu-mir-143,rno-mir-143,mdo-mir-143,oan-mir-143,	ssc-mir-143	gtcccccagccggaGGTGCAGTGCTGCATCTCTGGtcagctgggagtcTGAGATGAAGCACTGTAGCTCgggaagggaga	ssc-miR-143-5p	GGTGCAGTGCTGCATCTCTGG	5'	Diff	gp1a	..((((.((....((.(((..((.(((.(((((((((.((((((.((((......)).)).)))))).))))))))).))).))..))).))....)).))))	101	65	-50.8	0.8	238	797	221.816	855.15	middle	0	7.3e-123
203	370	hsa-miR-378a-5p	CTCCTGACTCCAGGTCCTGTGT	22	347618792	+	157640333	157640440	gcagccagtgggtgacagagccacccagggCTCCTGACTCCAGGTCCTGTGTgttgcctggaaatagcACTGGACTTGGAGTCAGAAGGCctgcgtggagtcgccttc	9	ssc-mir-378-1,bta-mir-378-1,cfa-mir-378,hsa-mir-378a,ggo-mir-378a,ptr-mir-378a,ppy-mir-378a,cgr-mir-378,rno-mir-378a,	hsa-mir-378a	agggCTCCTGACTCCAGGTCCTGTGTgttacctagaaatagcACTGGACTTGGAGTCAGAAGGcct	hsa-miR-378a-5p	CTCCTGACTCCAGGTCCTGTGT	5'	Yes	gp1a	.........(((((((....((((.((((.((.((((((((((((((.(((((((.......)))).))).)))))))))))))).)).)))).)))).)))))))..	97	61.1	-58.7	0.9	211	219	196.652	234.978	middle	2.2672e-05	1.62e-05
206	377	ssc-miR-1343	CTCCTGGGGCCCGCACTCTCGC	22	347618792	-	28433181	28433265	tgctggcttcggtgcTGGGGAGCGGCCCCCGGGCGGGCctctgctctggcccCTCCTGGGGCCCGCACTCTCGCtccgggtccgc	4	ssc-mir-1343,bta-mir-1343,hsa-mir-1343,cgr-mir-1343,	ssc-mir-1343	gcttcggtgctggggagcggcccccgggcgggcctctgctctggcccCTCCTGGGGCCCGCACTCTCGCtccgggtccg	ssc-miR-1343	CTCCTGGGGCCCGCACTCTCGC	3'	Yes	gp1a	.((.(((.((((.((..(((.((((.(((((((.(((((........)))))..))))))).)))).)))..)).))))))).))	84	78.8	-52.7	0.8	109	308	101.588	330.472	middle	2.52e-41	5.39e-42
208	379	ssc-miR-181c	AACATTCAACCTGTCGGTGAGT	22	347618792	-	65553658	65553760	gagaagttgccaagggtttgggggAACATTCAACCTGTCGGTGAGTttgggcagctcaggcaaACCATCGACCGTTGAGTGGACCccgaggcctggaactgcc	10	ssc-mir-181c,bta-mir-181c,cfa-mir-181c,hsa-mir-181c,ppy-mir-181c,mml-mir-181c,cgr-mir-181c,mmu-mir-181c,rno-mir-181c,mdo-mir-181c,	ssc-mir-181c	caagggtttgggggAACATTCAACCTGTCGGTGAGTttgggcagctcaggcaaaccatcgaccgttgagtggaccccgaggcctgga	ssc-miR-181c	AACATTCAACCTGTCGGTGAGT	5'	Yes	gp1a	....((((.((..(((..(.((((..((((((((..(((((((.(((((((....))...)))))))))))).))))))))..)))).)..)))))))))...	96	58.3	-45.9	0.8	673	1009	627.235	1082.62	middle	2.18e-56	2.28e-56
210	384	ssc-miR-1271_L+2R-2	AGTGCCTGCTATGTGCCAGG	20	347618792	-	83154205	83154313	ccccagcacctagatcagtgCTTGGCACCTAGTAAGCACTCAgtatatacttgttgAGTGCCTGCTATGTGCCAGGcattgtgctgagggctttgaggggatccagagg	8	ssc-mir-1271,bta-mir-1271,cfa-mir-1271,hsa-mir-1271,ggo-mir-1271,ptr-mir-1271,ppy-mir-1271,mml-mir-1271,	ssc-mir-1271	tagatcagtgcttggcacctagtaagcactcagtatatacttgttgagTGCCTGCTATGTGCCAGGCAttgtgctgag	ssc-miR-1271	TGCCTGCTATGTGCCAGGCA	3'	Diff	gp1a	(((((((.(((((..(((((((((((((.(((((.(((((((..(......)..))))))).))))).)))))))))))))..)).))))))....)))).........	100	53.2	-56.3	1	15	39	13.98	41.8455	middle	4.03e-06	3.04e-06
213	389	ssc-miR-628	ATGCTGACATATTTACTAGAGG	22	347618793	+	129013465	129013576	atagctgttgtgtcacttcctcATGCTGACATATTTACTAGAGGgtaaagttaacaacctTCTAGTAAGAGTGGCAGTCGAagggaagggctcatctgacttctggaaacct	6	ssc-mir-628,bta-mir-628,ggo-mir-628,ptr-mir-628,mml-mir-628,cgr-mir-628,	ssc-mir-628	gtgtcacttcctcATGCTGACATATTTACTAGAGGgtaaagttaacaaccttctagtaagagtggcagtcgaagggaagg	ssc-miR-628	ATGCTGACATATTTACTAGAGG	5'	Yes	gp1a	.(((..((((.(((.((((((..(((((.((..(((((((((((((..........)))))))))))))..)).))).))..))))))))).))....))..))).......	104	43.8	-35.8	0.7	401	419	373.732	449.57	middle	2.72e-09	1.89e-09
214	391	ssc-miR-31	AGGCAAGATGCTGGCATAGCTG	22	347618793	+	224397144	224397248	tgctcctgtaacttggaactggagaggAGGCAAGATGCTGGCATAGCTGttaaactgagaaccTGCTATGCCAACATATTGCCATCtttcttgtctgacagcagc	9	ssc-mir-31,bta-mir-31,eca-mir-31,cfa-mir-31,hsa-mir-31,cgr-mir-31,mmu-mir-31,rno-mir-31a,mdo-mir-31,	ssc-mir-31	actggagaggAGGCAAGATGCTGGCATAGCTGttaaactgagaacctgctatgccaacatattgccatctttcttgtc	ssc-miR-31	AGGCAAGATGCTGGCATAGCTG	5'	Yes	gp1a	.(((.(((....(..((...((((((..(((((.(((.(((((((((.(((........)))..))))))))).))).)))))..))))))..))..)))).)))	104	47.6	-43.2	0.9	325	474	302.9	508.583	middle	6.21e-26	5.47e-26
216	395	ssc-miR-181a_R-1	AACATTCAACGCTGTCGGTGAGT	23	347618793	+	299322123	299322232	tgccagggccaggactcagtcttcagagaactccaaggAACATTCAACGCTGTCGGTGAGTttgggatttgaaaaaACCACCGACCGTTGACTGTACCttggggttctta	4	ssc-mir-181a-2,bta-mir-181a-2,eca-mir-181a,cfa-mir-181a-2,	ssc-mir-181a-2	actccaaggAACATTCAACGCTGTCGGTGAGTTtgggatttgaaaaaaccaccgaccgttgactgtaccttggggttctt	ssc-miR-181a	AACATTCAACGCTGTCGGTGAGTT	5'	Diff	gp1a	.((....)).(((((...)))))..(((((((((((((.(((.((((((..(((((((.((((...........))))))))))))))))).))).))))))))))))).	84	50	-49	0.9	27884	22341	25987.9	23971	high	1.62e-61	1.67e-61
217	397	ssc-miR-181b_R-1	AACATTCATTGCTGTCGGTGGGT	23	347618793	+	299324011	299324099	ctgatggctgcactcAACATTCATTGCTGTCGGTGGGTttgagtctgaatcaACTCACTGATCAATGAATGCAAactgcggaccaaaca	8	ssc-mir-181b-2,bta-mir-181b-2,eca-mir-181b,cfa-mir-181b-2,ptr-mir-181b-2,ppy-mir-181b-2,mmu-mir-181b-2,rno-mir-181b-2,	ssc-mir-181b-2	atggctgcactcAACATTCATTGCTGTCGGTGGGTTtgagtctgaatcaactcactgatcaatgaatgcaaactgcggaccaaaca	ssc-miR-181b	AACATTCATTGCTGTCGGTGGGTT	5'	Diff	gp1a	....((((((((.....(((((((((..(((((((((((.((.......)))))))))))))))))))))).....))))).)))....	81	46.1	-34.7	0.8	11109	10090.2	10353.6	10826.4	high	1.35e-88	3.66e-88
218	399	ssc-miR-126-5p	CATTATTACTTTTGGTACGCG	21	347618793	+	313734663	313734745	cgctggcgacgggaCATTATTACTTTTGGTACGCGctgtgacacttcaaacTCGTACCGTGAGTAATAATGCGctgtcggcag	12	ssc-mir-126,bta-mir-126,eca-mir-126,cfa-mir-126,hsa-mir-126,ptr-mir-126,ppy-mir-126,mml-mir-126,cgr-mir-126,mmu-mir-126,rno-mir-126a,mdo-mir-126,	ssc-mir-126	cgacgggaCATTATTACTTTTGGTACGCGctgtgacacttcaaacTCGTACCGTGAGTAATAATGCGctgtcg	ssc-miR-126-5p	CATTATTACTTTTGGTACGCG	5'	Yes	gp1a	..(((.((((((..((((((((((..(((((((.....(((....)))....)))))))..))))))))))..)))))).)))	81	51.8	-37.8	0.9	3430	5588	3196.76	5995.7	middle	0	0
219	401	ssc-miR-30c-5p_R+1	TGTAAACATCCTACACTCTCAGCT	24	347618793	-	57721666	57721775	cactgagggacagatacTGTAAACATCCTACACTCTCAGCTgtggaaagtaagaaagCTGGGAGAAGGCTGTTTACTCTctctgccttggaaatcagctaaagagaaatg	10	ssc-mir-30c-2,bta-mir-30f,eca-mir-30c-2,cfa-mir-30c-2,hsa-mir-30c-2,ggo-mir-30c,mml-mir-30c-2,cgr-mir-30c,mmu-mir-30c-2,rno-mir-30c-2,	ssc-mir-30c-2	gacagatacTGTAAACATCCTACACTCTCAGCtgtggaaagtaagaaagCTGGGAGAAGGCTGTTTACTCTctctgcctt	ssc-miR-30c-5p	TGTAAACATCCTACACTCTCAGC	5'	Diff	gp1a	..(((((((.((((....(((((((.(((...(((((((((..............))))))))).))).)))))))....)))))))......)))).............	95	44.5	-34.4	0.7	45707.3	47038.4	42599.2	50470.4	high	0	0
220	403	ssc-miR-30a-5p_R+2	TGTAAACATCCTCGACTGGAAGCT	24	347618793	-	57750736	57750842	tccctgcgacagtgagcggcTGTAAACATCCTCGACTGGAAGCTgtgaggctgaagacgggCTTTCAGTCGGATGTTTGCAGCcgccgactgcctcccgcatcagga	9	ssc-mir-30a,bta-mir-30a,cfa-mir-30a,hsa-mir-30a,mml-mir-30a,cgr-mir-30a,mmu-mir-30a,rno-mir-30a,mdo-mir-30a,	ssc-mir-30a	tccctgcgacagtgagcggcTGTAAACATCCTCGACTGGAAGctgtgaggctgaagacgggCTTTCAGTCGGATGTTTGCAGCcgccgactgcctcccgcatcagga	ssc-miR-30a-5p	TGTAAACATCCTCGACTGGAAG	5'	Diff	gp1a	(((.((((.((((..((((((((((((((((..(((((((((((((..........)).)))))))))))))))))))))))))))..)))).....))))...)))	107	59.8	-55.2	0.9	403578	388693	376134	417052	high	0	0
221	405	ssc-miR-190a_R+2	TGATATGTTTGATATATTAGGTT	23	347618793	-	120447972	120448112	acctggatgcctttctgcaggcctctgtgTGATATGTTTGATATATTAGGTTgttatttaatccaACTATATATCAAACATATTCCTacagtgtcttgccctgtctccgggggttcctaatatagttcataaggcaacagg	9	ssc-mir-190a,bta-mir-190a,eca-mir-190a,cgr-mir-190a,mmu-mir-190a,rno-mir-190a,mdo-mir-190a,sha-mir-190,oan-mir-190a,	ssc-mir-190a	ggcctctgtgTGATATGTTTGATATATTAGGttgttatttaatccaactatatatcaaacatattcctacagtgtcttgccc	ssc-miR-190a	TGATATGTTTGATATATTAGG	5'	Diff	gp1a	.((((..((((((...((.(((..(((((.((((((((((((((((..(((((..........)))))))))))))))))))))..))))).)))...(((((....)))))............))....)))))).))))	76	40.4	-48.8	0.9	518	2747	482.775	2947.42	middle	0	0
224	410	ssc-miR-339	TCCCTGTCCTCCAGGAGCTCA	21	347618793	-	181756284	181756369	taagacaaggTCCCTGTCCTCCAGGAGCTCAtggtccaatagaagcatatatacaaatggctctgaggggagatcccgctgtggct	1	ssc-mir-339-2,	ssc-mir-339-2	taagacaaggTCCCTGTCCTCCAGGAGCTCAtggtccaatagaagcatatatacaaatggctctgaggggagatcccgctgtggct	ssc-miR-339	TCCCTGTCCTCCAGGAGCTCA	5'	Yes	gp1a	....(((.((...((..((((..(((((.(((......(((......)))......))))))))))))..))...))..)))....	78	51.2	-19.6	0.4	517.833	1048.83	482.62	1125.36	middle	0	6.99e-96
225	411	ssc-mir-1285-p5	CAGTAGTGGGATCGCGCCTGTGAATAGC	28	347618793	-	199694416	199694495	gctgatCAGTAGTGGGATCGCGCCTGTGAATAGCcactgtactccagcctgggcaACATAGCGAGACCCCGTCTCTTttg	1	ssc-mir-1285,	ssc-mir-1285	gctgatcagtagtgggatcgcgcctgtgaatagccactgtactccagcCTGGGCAACATAGCGAGACCCCGTctcttttg	ssc-mir-1285-p5	cagtagtgggatcgcgcctgtgaatagc	5'	Yes	gp1a	.......((.((((((.((.((.(((((....(((...((......))...)))..))))))).)).)))).))))....	69	56.2	-20	0.4	6762	5832	6302.18	6257.51	middle	1.55e-35	1.31e-35
225	412	ssc-mir-1285-p3_1ss22TA	ACATAGCGAGACCCCGTCTCTA	22	347618793	-	199694416	199694495	gctgatCAGTAGTGGGATCGCGCCTGTGAATAGCcactgtactccagcctgggcaACATAGCGAGACCCCGTCTCTTttg	1	ssc-mir-1285,	ssc-mir-1285	gctgatcagtagtgggatcgcgcctgtgaatagccactgtactccagcCTGGGCAACATAGCGAGACCCCGTctcttttg	ssc-mir-1285-p3	ACATAGCGAGACCCCGTctctt	3'	Diff	gp1a	.......((.((((((.((.((.(((((....(((...((......))...)))..))))))).)).)))).))))....	69	56.2	-20	0.4	10852	12833	10114.1	13769.3	high	0	0
226	413	ssc-miR-7	TGGAAGACTAGTGATTTTGTTGTT	24	347618793	-	212651385	212651477	tggacagccagccccatcTGGAAGACTAGTGATTTTGTTGTTgtctcactgcgctcaacaacaagtcccagtctgccgcatggtgccggccac	4	ssc-mir-7-1,bta-mir-7-1,eca-mir-7-1,cfa-mir-7-2,	ssc-mir-7-1	cagccccatcTGGAAGACTAGTGATTTTGTTGTTgtctcactgcgctcaacaacaagtcccagtctgccgcatggtgccggcca	ssc-miR-7	TGGAAGACTAGTGATTTTGTTGTT	5'	Yes	gp1a	......(((.((.((((..((.(((((...((.((((((((((............))))))))))))..))))).))..)))).)).)))...	84	55.9	-31.7	0.6	3701.5	4052.5	3449.79	4348.17	middle	0	1.53e-91
227	414	ssc-miR-491	AGTGGGGAACCCTTCCATGAGG	22	347618793	-	225810892	225810992	gggaattgacttagctgggtAGTGGGGAACCCTTCCATGAGGagtagaacactcCTTATGCAAGATTCCCTTCTACctgactgggttggagtcatatcctg	7	ssc-mir-491,bta-mir-491,cfa-mir-491,hsa-mir-491,ggo-mir-491,ptr-mir-491,mmu-mir-491,	ssc-mir-491	ttagctgggtAGTGGGGAACCCTTCCATGAGGagtagaacactccttatgcaagattcccttctacctgactgggt	ssc-miR-491	AGTGGGGAACCCTTCCATGAGG	5'	Yes	gp1a	((((..((((((((((((((((..(((((..(((.((((((((((.....)))))))))).))).)))))..)))))).....))))).)))))..)))).	100	49.5	-46.4	0.9	361	551	336.452	591.201	middle	1.07e-32	9.55e-33
228	417	ssc-miR-101_R+1	TACAGTACTGTGATAACTGAAG	22	347618793	-	242988419	242988510	agACTGAACTGTCCTTTTTcggttatcatggtaccgatgctgtatatctgaaaggTACAGTACTGTGATAACTGAAGaatggtggtgccatc	10	ssc-mir-101-1,bta-mir-101-2,eca-mir-101-2,cfa-mir-101-2,ptr-mir-101-2,cgr-mir-101b,mmu-mir-101b,rno-mir-101b,mdo-mir-101-2,oan-mir-101-2,	ssc-mir-101-1	gactgaactgtcctttttcggttatcatggtaccgatgctgtatatctgaaaggTACAGTACTGTGATAACTGAAgaatggtggtgccatc	ssc-miR-101	TACAGTACTGTGATAACTGAA	3'	Diff	gp1a	....((.((..((.((((((((((((((..((......(((((((.........)))))))))..)))))))))))))).))..))..))..	86	42.4	-32	0.8	6007.5	6483.5	5598.98	6956.54	middle	0	1.87e-137
6	8	oar-miR-377-5p_1ss11TC	AGAGGTTGCCCTTGGTGAATTC	22	333781020	-	10038	10152	ttcttgccctgctgacgtttgatccttgagcAGAGGTTGCCCTTGGTGAATTCgctttatttacgttgaATCACACAAAGGCAACTTTTGTttgagtatcaaatcctgcctggga	7	bta-mir-377,oar-mir-377,ggo-mir-377,ptr-mir-377,cgr-mir-377,mmu-mir-377,rno-mir-377,	oar-mir-377	aagaggtatcttggtgctcaggccctgctgacgtttgatccttgagcAGAGGTTGCCTTTGGTGAATTCgctttatttatgttgaATCACACAAAGGCAACTTTTGTttgagtatcaaatcctgcttggga	oar-miR-377-5p	AGAGGTTGCCTTTGGTGAATTC	5'	Diff	gp1b	......(((.((....(((((((.((..(((((((((((((.(((((((.(((((.........).)))))))).))).)))))))))))))..)).)))))))...))..))).	108	44.3	-45.5	0.9	2	9	1.864	9.65665	low	0.0069403	0.00689259
10	15	oar-miR-485-3p	GTCATACACGGCTCTCCTCTCT	22	333781020	-	16587	16689	tatggtacttgaagAGAGGCTGGCCGTGATGAATTCGattcatcaaagcgaGTCATACACGGCTCTCCTCTCTtttagtgtcagattctgcctcggagggctt	8	bta-mir-485,oar-mir-485,cfa-mir-485,hsa-mir-485,ggo-mir-485,ptr-mir-485,mmu-mir-485,rno-mir-485,	oar-mir-485	caagtgtccacttatggtacttgaagAGAGGCTGGCCGTGATGAATTCGattcatcaaagcgaGTCATACACGGCTCTCCTCTCTtttagtgtcaaattctgcctcggagg	oar-miR-485-3p	GTCATACACGGCTCTCCTCTCT	3'	Yes	gp1b	..((..(((..((((((((..(((((((((((.((((...........)))))))).)))))))..))))))))..)))..))......((((....))))..	81	48.5	-43.7	0.9	169	327	157.508	350.858	middle	3.46e-29	2.85e-29
16	25	cfa-miR-33a_R+1	GTGCATTGTAGTTGCATTGCA	21	333781107	+	30048	30100	GTGCATTGTAGTTGCATTGCATGTTCTGGCAGTACCCGTGcagtgtttccacn	1	cfa-mir-33a,	cfa-mir-33a	GTGCATTGTAGTTGCATTGCatgttctggcggtacccgtgcaatgtttccacagtgcatca	cfa-miR-33a	GTGCATTGTAGTTGCATTGC	5'	Diff	gp1b	.............((((((((((....((.....)))))))))))).......	33	49.1	-12.2	0.5	47	118	43.8039	126.609	middle	3.27e-15	1.76e-15
22	33	bta-miR-26b	TTCAAGTAATTCAGGATAGGTT	22	347613170	+	56006	56081	tgcccgggacccagTTCAAGTAATTCAGGATAGGTTgtgtgctgtccagCCTGTTCTCCATTACTTGGCTCggggg	7	bta-mir-26b,cfa-mir-26b,hsa-mir-26b,ptr-mir-26b,cgr-mir-26b,mmu-mir-26b,rno-mir-26b,	bta-mir-26b	tgcccgggacccagTTCAAGTAATTCAGGATAGGTTgtgtgctgtccagcctgttctccattacttggctcgggggccggtgccc	bta-miR-26b	TTCAAGTAATTCAGGATAGGTT	5'	Yes	gp1b	..((((((.......(((((((((..(((((((((((.........)))))))))))..)))))))))))))))..	72	55.3	-30.7	0.7	24842	18497	23152.7	19846.6	high	1.19e-14	6.63e-15
22	34	hsa-miR-26b-3p	CCTGTTCTCCATTACTTGGCTC	22	347613170	+	56006	56081	tgcccgggacccagTTCAAGTAATTCAGGATAGGTTgtgtgctgtccagCCTGTTCTCCATTACTTGGCTCggggg	7	bta-mir-26b,cfa-mir-26b,hsa-mir-26b,ptr-mir-26b,cgr-mir-26b,mmu-mir-26b,rno-mir-26b,	hsa-mir-26b	ccgggacccagTTCAAGTAATTCAGGATAGGTtgtgtgctgtccagCCTGTTCTCCATTACTTGGCTCggggaccgg	hsa-miR-26b-3p	CCTGTTCTCCATTACTTGGCTC	3'	Yes	gp1b	..((((((.......(((((((((..(((((((((((.........)))))))))))..)))))))))))))))..	72	55.3	-30.7	0.7	46	174	42.872	186.695	middle	1.47e-29	1e-30
23	35	bta-miR-188_R-4	CATCCCTTGCATGGTGGA	18	347618775	+	48632378	48632485	ccctgctccctctctcaCATCCCTTGCATGGTGGAgggtgagctttctgaaaaccCCTCCCACGTGCAGGGTTTGCAggatggtgagcctcggcgtcctttgctctct	10	bta-mir-188,eca-mir-188,cfa-mir-188,hsa-mir-188,ggo-mir-188,ptr-mir-188,mml-mir-188,cgr-mir-188,mmu-mir-188,rno-mir-188,	bta-mir-188	tgctccctctctcaCATCCCTTGCATGGTGGAGGGTgagctttctgaaaacccctcccacatgcagggtttgcaggatggtgagcc	bta-miR-188	CATCCCTTGCATGGTGGAGGGT	5'	Diff	gp1b	....((((((..(((..((..(((((((((..((((((................))))))..)))))))))..))..))).)).))))...((((.....))))....	84	59.3	-41.3	0.6	16	145	14.912	155.579	middle	5.56e-35	1.51e-38
24	37	bta-miR-660_1ss20CT	TACCCATTGCATATCGGAGTTG	22	347618775	+	48640809	48640903	gaactgctccttctcccaTACCCATTGCATATCGGAGTTGtgaattctcaaagcacctcctatgtgcatggtttacaggagggcgagccctgtca	7	bta-mir-660,eca-mir-660,cfa-mir-660,hsa-mir-660,ggo-mir-660,ptr-mir-660,mml-mir-660,	bta-mir-660	ctgctccttctcccgTACCCATTGCATATCGGAGCTGtgaattctcaaagcacctcctatgtgcatggattacaggaggg	bta-miR-660	TACCCATTGCATATCGGAGCTG	5'	Diff	gp1b	((...((((..(((((.....(((.(((((((.((((.(((...........))).)))).))))))))))......)))))..))))....)).	94	50.5	-32.3	0.7	426	365	397.032	391.631	middle	0.0024987	0.00137465
30	45	eca-miR-507_L+2R-1_1ss16AT	TGATTGGCACCTCTTTGAGTGA	22	347618775	-	137160736	137160825	tgtgtgcggtgctccacttcaagaagtgccatccatgtggctagaaataTGATTGGCACCTCTTTGAGTGAcgtaacacacaacaggtac	1	eca-mir-507,	eca-mir-507	catgttgtgtgcagtgctccacttcaggaagtgccatccatgtggctagaaatatgATTGGCACCTCTTAGAGTGAAgtaatgcacaacaggtac	eca-miR-507	ATTGGCACCTCTTAGAGTGAA	3'	Diff	gp1b	((((((...(((..((((..((((.((((((..(((((........)))))..)))))).))))..))))..))).))))))........	82	47.8	-33.5	0.8	18	25	16.776	26.824	middle	0.022133	0.0170264
33	49	rno-mir-3553-p5	TTATGGCCCTTCGGTAATTCACT	23	347618776	-	20030641	20030736	cggatctgtctctgctctgtTTATGGCCCTTCGGTAATTCACTgaccgagactgttcacagTGAATTCTACCAGTGCCATACAcagaacaggagtc	1	rno-mir-3553,	rno-mir-3553	cggatctgtctctgctctgtttatggcccttcggtaattcactgaccgagactgttcaCAGTGAATTCTACCAGTGCCATAcacaggacaggagtcacactctctg	rno-mir-3553-p5	ttatggcccttcggtaattcact	5'	Yes	gp1b	........((.(((.(((((.((((((.((..((((((((((((...(((....))).))))))))..)))))).)))))).))))).)))))...	85	49	-32.8	0.7	16	22	14.912	23.6051	middle	0.033937	0.0227912
38	57	bta-miR-375_L-1	TTTGTTCGTTCGGCTCGCGTGA	22	347618779	+	133957529	133957635	gccaggccccgggccctccgcccccgccccgcgacgagcccctcgcacaaaccggacctgagcgtTTTGTTCGTTCGGCTCGCGTGAggcaggggcggcctctcagc	6	bta-mir-375,cfa-mir-375,ggo-mir-375,ptr-mir-375,rno-mir-375,mdo-mir-375,	bta-mir-375	ccccgcgacgagcccctcgcacaaaccggacctgagcgTTTTGTTCGTTCGGCTCGCGTGAggc	bta-miR-375	TTTTGTTCGTTCGGCTCGCGTGA	3'	Diff	gp1b	....((((...))))..(((((((.(((.((((.((((((...((.(((((.((........)).))))).))...)))))))))).))).))))))).........	81	74.8	-53.5	0.7	38724	44247	36090.7	47475.3	high	0	0
43	62	bta-miR-346	TGTCTGCCCGCATGCCTGCCTCT	23	347618780	-	94051815	94051925	aggtctctgtgttgggcgtcTGTCTGCCCGCATGCCTGCCTCTctgtggctctgaaggaggcaggggctgggcctgcagctgcctggacagagcggctcctgcgtgggaca	6	bta-mir-346,eca-mir-346,cfa-mir-346,ggo-mir-346,ptr-mir-346,mml-mir-346,	bta-mir-346	ggtctctgtgttgggcgtcTGTCTGCCCGCATGCCTGCCTCTctgttgctctgaaggaggcaggggctgggcttgcagctgcctgggcagagcgg	bta-miR-346	TGTCTGCCCGCATGCCTGCCTCT	5'	Yes	gp1b	..(.((((((.(..(((..((((..((((((...((((((((.((..........)))))))))).)).))))..))))..)))..))))))))...((((....))))..	92	66.7	-51.4	0.7	5	24	4.65999	25.7511	middle	7.419e-06	6.83e-06
46	68	bta-mir-6529-p3	CCTGTGCCTTTTACCTCTTTAA	22	347618781	+	149441291	149441369	ctgttctcttGAGAGATCAGAGGCGCAGAGTgcgtcaatgtcagtgaagCCTGTGCCTTTTACCTCTTTAAgagcgcac	1	bta-mir-6529,	bta-mir-6529	ctgttctcttGAGAGATCAGAGGCGCAGAGTgcgtcaatgtcaatgaagcctgtgccttttacctctttaagagcgcac	bta-mir-6529-p3	cctgtgccttttacctctttaa	3'	Yes	gp1b	.((..((((((((((...((((((((((...((.(((.......))).))))))))))))...))))).)))))..)).	77	50.6	-29.9	0.7	18	185	16.776	198.498	middle	1.94e-45	3.41e-50
51	75	hsa-miR-3065-5p	TCAACAAAATCACTGATGCTGGA	23	347618782	-	1507082	1507171	ggctggcagctgccctctTCAACAAAATCACTGATGCTGGAgttgcgtgtgtcatcacTCAGCACCAGGATATTGTTGGGGaggacggcc	3	hsa-mir-3065,mmu-mir-3065,rno-mir-3065,	hsa-mir-3065	ctgccctctTCAACAAAATCACTGATGCTGGAgtcgcctgagtcatcacTCAGCACCAGGATATTGTTGGAGaggacag	hsa-miR-3065-5p	TCAACAAAATCACTGATGCTGGA	5'	Yes	gp1b	........((((.((((..((((((.(((.(((.((((((......(((......))))))))).)))))).))))))..)))).)))).	81	55.6	-38.7	0.8	1	9	0.931999	9.65665	low	0.00213	0.00191636
54	80	bta-miR-2404_R+8	TTGCACTGCATGGTATCTGCATTCAGCA	28	347618785	+	29686699	29686760	aTTGCACTGCATGGTATCTGCATTCAGCAGTTTGTTTCTGCTGGGTGTTCAAagaacagtgc	2	bta-mir-2404-1,bta-mir-2404-2,	bta-mir-2404-2	tgTTGCACTGCATGGTATCTGCattcagcagtttgttcctgctggctgttcaaaagacagtgcgata	bta-miR-2404	TTGCACTGCATGGTATCTGC	5'	Diff	gp1b	...((((((..........(((..((((((.......))))))..)))........))))))	29	45.2	-22.9	0.8	4	12	3.728	12.8755	middle	0.0064031	0.00736267
54	81	bta-mir-2404-1-p3_1ss20CG	AGCAGTTTGTTCCTGCTGGGTGTTCAA	27	347618785	+	29686699	29686760	aTTGCACTGCATGGTATCTGCATTCAGCAGTTTGTTTCTGCTGGGTGTTCAAagaacagtgc	2	bta-mir-2404-1,bta-mir-2404-2,	bta-mir-2404-1	aTTGCACTGCATGGTATCTGCattcagcagtttgttcctgctggctgttcaaaagacagtgcgat	bta-mir-2404-1-p3	agcagtttgttcctgctggctgttcaa	3'	Diff	gp1b	...((((((..........(((..((((((.......))))))..)))........))))))	29	45.2	-22.9	0.8	0	4	0	4.29184	low	0.020204	0.038547
59	87	bta-miR-34b_R+1	AGGCAGTGTAATTAGCTGATTGT	23	347618785	-	44167411	44167516	gcccggtgctcggtttgtAGGCAGTGTAATTAGCTGATTGTactctggcgcttacAATCACTAATTCCACTGCCATCaaaacaaggcacagcatcacccgccgccc	6	bta-mir-34b,eca-mir-34b,cfa-mir-34b,ggo-mir-34b,cgr-mir-34b,mmu-mir-34b,	bta-mir-34b	gtgctcggtttgtAGGCAGTGTAATTAGCTGATTGtactctcatgcttacaatcactagttccactgccatcaaaacaaggcac	bta-miR-34b	AGGCAGTGTAATTAGCTGATTG	5'	Diff	gp1b	((...(((((..((((...(((((((.((((((.((((((((..........)))))))))))))).)))))))....))))..))))).))..............	92	52.8	-37.9	0.7	6	91	5.59199	97.6394	middle	8.43e-25	1.08e-27
69	98	mmu-mir-1983-p5_1ss1GA	AAAAGCATGCTCCAGTGGCGC	21	347618787	+	23030083	23030199	GAAAGCATGCTCCAGTGGCGCaatcggttagcgcgcggtacttatacagcagtatatgtgcgggtgatgccgaggttgtgagttcgagcCTCACCTGGAGCATGTTTTCTtcccttt	1	mmu-mir-1983,	mmu-mir-1983	cctttacagagaaagcatgctccagtggcgcaatcggttagcgcgcggtacttatacagcagtatatgtgcgggtgatgccgaggttgtgagttcgagcCTCACCTGGAGCATGTTTTCTtccctttccgcc	mmu-mir-1983-p5	gaaagcatgctccagtggcgc	5'	Diff	gp1b	(((((((((((((((........(((((...(((.((.(((.(((((....))))).))))).)))..)))))....(((((.......))))))))))))))))))))........	109	53	-49.4	0.8	25	104	23.3	111.588	middle	2.66e-19	2.28e-20
69	99	mmu-miR-1983	CTCACCTGGAGCATGTTTTCT	21	347618787	+	23030083	23030199	GAAAGCATGCTCCAGTGGCGCaatcggttagcgcgcggtacttatacagcagtatatgtgcgggtgatgccgaggttgtgagttcgagcCTCACCTGGAGCATGTTTTCTtcccttt	1	mmu-mir-1983,	mmu-mir-1983	cctttacagagaaagcatgctccagtggcgcaatcggttagcgcgcggtacttatacagcagtatatgtgcgggtgatgccgaggttgtgagttcgagcCTCACCTGGAGCATGTTTTCTtccctttccgcc	mmu-miR-1983	CTCACCTGGAGCATGTTTTCT	3'	Yes	gp1b	(((((((((((((((........(((((...(((.((.(((.(((((....))))).))))).)))..)))))....(((((.......))))))))))))))))))))........	109	53	-49.4	0.8	185	404	172.42	433.476	middle	1.68e-41	5.99e-42
74	104	cfa-miR-200b	CATCTTACTGGGCAGCATTGGA	22	347618788	+	58064307	58064381	cgcCATCTTACTGGGCAGCATTGGAtggtgtctggtctcTAATACTGCCTGGTAATGATGAcggcggggccctgc	5	bta-mir-200b,eca-mir-200b,cfa-mir-200b,mmu-mir-200b,mdo-mir-200b,	cfa-mir-200b	gccatcgcCATCTTACTGGGCAGCATTGGAtggtgtcaggtctctaatactgcctggtaatgatgacggcggggccctgc	cfa-miR-200b	CATCTTACTGGGCAGCATTGGA	5'	Yes	gp1b	((.((((((((..(((((.((((((.((.......)))))))).)))))..)))).)))).))((((....))))	63	57.3	-30.3	0.7	1379	1730	1285.23	1856.22	middle	1.95e-62	3.9e-62
74	105	bta-miR-200b_R+1	TAATACTGCCTGGTAATGATGA	22	347618788	+	58064307	58064381	cgcCATCTTACTGGGCAGCATTGGAtggtgtctggtctcTAATACTGCCTGGTAATGATGAcggcggggccctgc	5	bta-mir-200b,eca-mir-200b,cfa-mir-200b,mmu-mir-200b,mdo-mir-200b,	bta-mir-200b	ccatcttactgggcagcattggatggtgtctggtctcTAATACTGCCTGGTAATGATGa	bta-miR-200b	TAATACTGCCTGGTAATGATG	3'	Diff	gp1b	((.((((((((..(((((.((((((.((.......)))))))).)))))..)))).)))).))((((....))))	63	57.3	-30.3	0.7	66045	101040	61553.9	108412	high	0	0
77	108	mmu-miR-30f_L+1R-1_1ss17AG	TGTAAACATCCGACTGGAAGCT	22	347618788	+	157476651	157476742	tggcagcctgccgcTGTAAACATCCGACTGAAAGCTcctgggaacgcctcacagcttccagtcaaggatgtttacagtggcaaagactgccc	1	mmu-mir-30f,	mmu-mir-30f	tggcagcctgccgctGTAAACATCCGACTGAAAGCTCctctcaacaccttacagcttccagtcaaggatgtttacagtagcaaagactgccc	mmu-miR-30f	GTAAACATCCGACTGAAAGCTC	5'	Diff	gp1b	.(((((.(((((((((((((((((((((((.(((((...(((....)))...))))).)))))..)))))))))))))))))..).))))).	90	55.4	-52.4	1	1	8	0.931999	8.58368	low	0.0043709	0.00395829
78	109	bta-mir-2887-2-p5	CCGGGGTCCGGTGCGGA	17	347618788	-	866649	866705	cgtcgggaCCGGGGTCCGGTGCGGAGAGCCCTTCGTCCTGGGAaacggggcgcggcc	1	bta-mir-2887-2,	bta-mir-2887-2	cgtCGGGACCGGGGTCCGGTGCGgagagcccttcgtcccgggacacggggcgcggcc	bta-mir-2887-2-p5	CCGGGGTCCGGTGCGga	5'	Yes	gp1b	.((((...(((...(((((..(((((....)))))..)))))...)))....)))).	55	77.2	-24.5	0.6	2411	8287	2247.05	8891.62	middle	0	0
78	110	bta-mir-2887-2-p3_1ss24CT	CCGGTGCGGAGAGCCCTTCGTCCTGGGA	28	347618788	-	866649	866705	cgtcgggaCCGGGGTCCGGTGCGGAGAGCCCTTCGTCCTGGGAaacggggcgcggcc	1	bta-mir-2887-2,	bta-mir-2887-2	cgtCGGGACCGGGGTCCGGTGCGgagagcccttcgtcccgggacacggggcgcggcc	bta-mir-2887-2-p3	CCGGTGCGgagagcccttcgtcccggga	3'	Diff	gp1b	.((((...(((...(((((..(((((....)))))..)))))...)))....)))).	55	77.2	-24.5	0.6	1158	5887	1079.25	6316.52	middle	0	0
79	111	bta-miR-2904_L+3R+3	CGCGGGAGCCTCGGTTGGCCTCGGA	25	347618788	-	866740	866808	acggcagcgcCGCGGGAGCCTCGGTTGGCCTCGGATAGCCGGTCCCCCGCCGTCCCcgccggcgggccg	1	bta-mir-2904-3,	bta-mir-2904-3	acggcagcgccgcGGGAGCCTCGGTTGGCCTCggatagccggtcccccgccgtccccgccggcgggccgt	bta-miR-2904	GGGAGCCTCGGTTGGCCTC	5'	Diff	gp1b	.((((..(((((((((..(..(((..((..((((....))))..)))))..)..)))).))))).))))	68	82.6	-37	0.6	5983	16916	5576.15	18150.2	high	0	0
79	112	bta-mir-2904-3-p3	TAGCCGGTCCCCCGCCGTCCC	21	347618788	-	866740	866808	acggcagcgcCGCGGGAGCCTCGGTTGGCCTCGGATAGCCGGTCCCCCGCCGTCCCcgccggcgggccg	1	bta-mir-2904-3,	bta-mir-2904-3	acggcagcgccgcGGGAGCCTCGGTTGGCCTCggatagccggtcccccgccgtccccgccggcgggccgt	bta-mir-2904-3-p3	tagccggtcccccgccgtccc	3'	Yes	gp1b	.((((..(((((((((..(..(((..((..((((....))))..)))))..)..)))).))))).))))	68	82.6	-37	0.6	3762	6309	3506.18	6769.31	middle	0	0
80	113	hsa-mir-6087-p5_1ss13TC	GGGGGCGAGCCCCGAG	16	347618788	-	867408	867456	ggtgaggcggGGGGGCGAGCCCCGAGGGGCTCTCGCTTCTGGCGCCAAg	1	hsa-mir-6087,	hsa-mir-6087	ggTGAGGCGGGGGGGCGAGCcctgaggggctctcgcttctggcgccaag	hsa-mir-6087-p5	GGGGGCGAGCcctgag	5'	Diff	gp1b	.....((((.((..((((((((....))))))..))..))..))))...	41	77.6	-26.4	0.7	23	64	21.436	68.6695	middle	1.09e-09	4.13e-10
80	114	hsa-mir-6087-p3	GGGGCTCTCGCTTCTGGCGCCAA	23	347618788	-	867408	867456	ggtgaggcggGGGGGCGAGCCCCGAGGGGCTCTCGCTTCTGGCGCCAAg	1	hsa-mir-6087,	hsa-mir-6087	ggTGAGGCGGGGGGGCGAGCcctgaggggctctcgcttctggcgccaag	hsa-mir-6087-p3	ggggctctcgcttctggcgccaa	3'	Yes	gp1b	.....((((.((..((((((((....))))))..))..))..))))...	41	77.6	-26.4	0.7	408	7442	380.256	7984.97	middle	0	0
81	115	sha-mir-716a-p5_1ss11TC	GTAGGAGGGCCGCTGCGGT	19	347618788	-	868791	868939	gctacgccgcgacgaGTAGGAGGGCCGCTGCGGTgagccttgaagcctagggcgtgggcccgggtggagccgccgcaGGTGCAGATCTTGGTGGTAGTAGCAaatattcaaacgagaactttgaaggccgaagtggagaagggttccat	1	sha-mir-716a,	sha-mir-716a	ggctaggccacgatgagtaggagggctgctGCGGTGGGCCTGGAAGCCTagggcatgggcccaggtggagctgccgcaggtgtAGATCTTGGTGGTAGTAGCAAATATtcaaacgagaactttgaaggctgaggtggagaagggttccat	sha-mir-716a-p5	gtaggagggctgctGCGGT	5'	Diff	gp1b	((((((((((......(((((..((..((((((((.((((....((((.((((....)))))))))).))))))))))..))...)))))))))).)))))................((((((.....))))))((((.....))))..	101	60.4	-55	0.6	354	638	329.928	684.549	middle	6.39e-50	3.95e-50
81	116	sha-mir-716a-p3_1ss5TC	GGTGCAGATCTTGGTGGTAGTAGCA	25	347618788	-	868791	868939	gctacgccgcgacgaGTAGGAGGGCCGCTGCGGTgagccttgaagcctagggcgtgggcccgggtggagccgccgcaGGTGCAGATCTTGGTGGTAGTAGCAaatattcaaacgagaactttgaaggccgaagtggagaagggttccat	1	sha-mir-716a,	sha-mir-716a	ggctaggccacgatgagtaggagggctgctGCGGTGGGCCTGGAAGCCTagggcatgggcccaggtggagctgccgcaggtgtAGATCTTGGTGGTAGTAGCAAATATtcaaacgagaactttgaaggctgaggtggagaagggttccat	sha-mir-716a-p3	ggtgtAGATCTTGGTGGTAGTAGCA	3'	Diff	gp1b	((((((((((......(((((..((..((((((((.((((....((((.((((....)))))))))).))))))))))..))...)))))))))).)))))................((((((.....))))))((((.....))))..	101	60.4	-55	0.6	104041	230398	96966.1	247208	high	0	0
82	117	mmu-mir-5105-p5	AGTCCTTCTGATCGAGGCC	19	347618788	-	870882	870961	cactccccggcgccgctcgtggggggcccaAGTCCTTCTGATCGAGGCCCAGCCCGTGGAcggtgtgaggccggtagcgg	1	mmu-mir-5105,	mmu-mir-5105	cgcactccccGGCGCCGCTCGTGGGGGGCCcaagtccttctgatcgaggcccagcccgtggacggtgtgaggctggtcgcgg	mmu-mir-5105-p5	agtccttctgatcgaggcc	5'	Yes	gp1b	......(((((((((..(..((((((((...(((.....)))...)))))..)))..)..)))).....)))))......	68	73.8	-33.1	0.6	3186	10237	2969.35	10983.9	high	0	0
82	118	mmu-mir-5105-p3	TCGAGGCCCAGCCCGTGGA	19	347618788	-	870882	870961	cactccccggcgccgctcgtggggggcccaAGTCCTTCTGATCGAGGCCCAGCCCGTGGAcggtgtgaggccggtagcgg	1	mmu-mir-5105,	mmu-mir-5105	cgcactccccGGCGCCGCTCGTGGGGGGCCcaagtccttctgatcgaggcccagcccgtggacggtgtgaggctggtcgcgg	mmu-mir-5105-p3	tcgaggcccagcccgtgga	3'	Yes	gp1b	......(((((((((..(..((((((((...(((.....)))...)))))..)))..)..)))).....)))))......	68	73.8	-33.1	0.6	7073	17559	6592.03	18840.1	high	0	0
88	125	bta-miR-677_R+4_1ss13CT	CTCACTGATGAGTAGCTTCTGACTTTC	27	347618789	-	23664730	23664795	CTCACTGATGAGTAGCTTCTGACTTTCGTTCTTCTGAGTTTGCTGAagccagatgccattcctgag	1	bta-mir-677,	bta-mir-677	CTCACTGATGAGCAGCTTCTGACtttcgttcttctgagtttgctgaagccagatgccatttctgag	bta-miR-677	CTCACTGATGAGCAGCTTCTGAC	5'	Diff	gp1b	((((..((((.((((((((.(((((..........)))))....)))))....)))))))..))))	66	47	-13.8	0.4	6	15	5.59199	16.0944	middle	0.0050557	0.00665692
90	129	hsa-miR-200c-5p	CGTCTTACCCAGCAGTGTTTGG	22	347618789	-	66194124	66194207	gggtgggggccccCGTCTTACCCAGCAGTGTTTGGgtgctgcttgcgagtctcTAATACTGCCGGGTAATGATGGAggcccctg	8	bta-mir-200c,eca-mir-200c,cfa-mir-200c,hsa-mir-200c,ggo-mir-200c,cgr-mir-200c,mmu-mir-200c,mdo-mir-200c,	hsa-mir-200c	ccctCGTCTTACCCAGCAGTGTTTGGgtgcggttgggagtctcTAATACTGCCGGGTAATGATGGAgg	hsa-miR-200c-5p	CGTCTTACCCAGCAGTGTTTGG	5'	Yes	gp1b	....(((((((.(((((((((((.((((((((.((((((.....)))...))).)))))))).)))))).))))).))))))).	79	61.9	-49.2	0.9	122	182	113.704	195.279	middle	2.31e-11	2.38e-11
90	130	bta-miR-200c	TAATACTGCCGGGTAATGATGGA	23	347618789	-	66194124	66194207	gggtgggggccccCGTCTTACCCAGCAGTGTTTGGgtgctgcttgcgagtctcTAATACTGCCGGGTAATGATGGAggcccctg	8	bta-mir-200c,eca-mir-200c,cfa-mir-200c,hsa-mir-200c,ggo-mir-200c,cgr-mir-200c,mmu-mir-200c,mdo-mir-200c,	bta-mir-200c	cgtcttacccagcagtgtttgggtgctggttgggagtctcTAATACTGCCGGGTAATGATGGAgg	bta-miR-200c	TAATACTGCCGGGTAATGATGGA	3'	Yes	gp1b	....(((((((.(((((((((((.((((((((.((((((.....)))...))).)))))))).)))))).))))).))))))).	79	61.9	-49.2	0.9	201001	212508	187333	228013	high	0	0
100	142	eca-miR-590-5p	GAGCTTATTCATAAAAGTACAG	22	347618791	+	11024985	11025078	tagccaatcagaaatGAGCTTATTCATAAAAGTACAGtataatccagtaaacctgTAATTTTATGTATAAGCTAGTctctgattgaaaaatgca	6	eca-mir-590,cfa-mir-590,hsa-mir-590,ptr-mir-590,ppy-mir-590,mmu-mir-590,	eca-mir-590	caatcagaaacGAGCTTATTCATAAAAGTACAGtataatccagtaaacctgTAATTTTATGTATAAGCTAGTctctgattg	eca-miR-590-5p	GAGCTTATTCATAAAAGTACAG	5'	Yes	gp1b	....((((((((....(((((((.(((((((.(((((...............))))).))))))).)))))))....)))))))).........	81	29.8	-29.1	1	89	265	82.9479	284.335	middle	2.34e-37	3.32e-38
100	143	eca-miR-590-3p	TAATTTTATGTATAAGCTAGT	21	347618791	+	11024985	11025078	tagccaatcagaaatGAGCTTATTCATAAAAGTACAGtataatccagtaaacctgTAATTTTATGTATAAGCTAGTctctgattgaaaaatgca	6	eca-mir-590,cfa-mir-590,hsa-mir-590,ptr-mir-590,ppy-mir-590,mmu-mir-590,	eca-mir-590	caatcagaaacGAGCTTATTCATAAAAGTACAGtataatccagtaaacctgTAATTTTATGTATAAGCTAGTctctgattg	eca-miR-590-3p	TAATTTTATGTATAAGCTAGT	3'	Yes	gp1b	....((((((((....(((((((.(((((((.(((((...............))))).))))))).)))))))....)))))))).........	81	29.8	-29.1	1	70	249	65.2399	267.167	middle	5.4e-40	1.67e-41
102	146	bta-mir-216b-p3_1ss13TC	GATTCTACAGTCCGAC	16	347618791	+	90047313	90047398	gtggcagactggaAAATCTCTGCAGGCAAATGTGAtgttactaaagaaatcacacacttacctgtagaGATTCTACAGTCTGACat	5	bta-mir-216b,eca-mir-216b,hsa-mir-216b,ptr-mir-216b,ppy-mir-216b,	bta-mir-216b	gcagactggaAAATCTCTGCAGGCAAATGTGAtgtcactaaagaaatcacacacttacccgtagagattctacagtctgaca	bta-mir-216b-p3	gattctacagtctgac	3'	Diff	gp1b	(((.(((((((...((((((((((((....((((((............))))))......))))))))))))...))))))).)))	86	40.7	-36.4	1	0	4	0	4.29184	low	0.020204	0.038547
103	147	eca-miR-1842_1ss9TC	TGGCTCTGCGAGGTCGGCTCA	21	347618791	-	42401487	42401546	TGGCTCTGCGAGGTCGGCTCAaggtgggtctggatattgAGCAGGCCTGTCAGGGCGTTG	2	eca-mir-1842,cfa-mir-1842,	eca-mir-1842	TGGCTCTGTGAGGTCGGCTCAaggtgggtctggatattgagcaggcctgtcagggcgttg	eca-miR-1842	TGGCTCTGTGAGGTCGGCTCA	5'	Diff	gp1b	..((((((..(((((.((((((..............)))))).)))))..))))))....	54	61.7	-25.1	0.7	87	317	81.0839	340.129	middle	3.17e-51	3.4e-53
103	148	eca-mir-1842-p3	AGCAGGCCTGTCAGGGCGTTG	21	347618791	-	42401487	42401546	TGGCTCTGCGAGGTCGGCTCAaggtgggtctggatattgAGCAGGCCTGTCAGGGCGTTG	2	eca-mir-1842,cfa-mir-1842,	eca-mir-1842	TGGCTCTGTGAGGTCGGCTCAaggtgggtctggatattgagcaggcctgtcagggcgttg	eca-mir-1842-p3	agcaggcctgtcagggcgttg	3'	Yes	gp1b	..((((((..(((((.((((((..............)))))).)))))..))))))....	54	61.7	-25.1	0.7	2	25	1.864	26.824	middle	1.13e-07	3.8e-08
106	153	mmu-mir-703-p5	AGACTGGTTAATGATAACAATGCA	24	347618793	+	103477704	103477817	AGACTGGTTAATGATAACAATGCAtcgtaaaaccttcagaaggaaaggaGAATGTTTTGTGGACCATTTGttttgtgtgtggcagtttttaagttattagtttttaaaatcagt	2	eca-mir-703,mmu-mir-703,	mmu-mir-703	agactggttaatgataacaatgcatcatAAAACCTTCAGAAGGAAAGAAtgttgtggaccatttttttttgtgtgtggcagttttaagttattagttttcaaaatcagt	mmu-mir-703-p5	agactggttaatgataacaatgca	5'	Yes	gp1b	..(((((((..(((((((.......(..(((((.(((............))).)))))..)..((((...........))))..........)))))))........)))))))	112	32.5	-15.2	0.4	20	38	18.64	40.7725	middle	0.00016121	0.000148504
1	1	hsa-mir-4537-p5_1ss14GA	TGGGCTGAGCTGAACTGAGC	20	gi|333778829|ref|NW_003541198.1|	+	940	1199	gaactgggttgagcTGGGCTGAGCTGACCTGAGCtgaactgggttgatctgggttgagatgggctgagctgggctgaactgggcnn	2	hsa-mir-4537,hsa-mir-4537,hsa-mir-4537,hsa-mir-4537,hsa-mir-4538,hsa-mir-4538,hsa-mir-4538,	hsa-mir-4537	TGAGCCGAGCTGAGCTTAGCTGggctgagctaaccagggctgggctgagctgggctgagctgagctgagc	hsa-mir-4537-p5	tgggctgagctgagctgagc	5'	Diff	gp2a	...(..((((.((((..(((.((((...((.(((....(..((....))..)))).))...)))).)))..)))).))))..)...	80	58.1	-30.3	0.6	0	4	0	4.29184	low	0.020204	0.038547
6	6	hsa-miR-151b_R+3	TCGAGGAGCTCACAGTCTAGA	21	gi|333781281|ref|NW_003538746.1|	+	6978	7238	ctggtggcggtcactgggcgagaggaccaagcacttttcctgcccTCGAGGAGCTCACAGTCTAGTacgtctcatcccctactagactgaagctccttgaggacagggatcgtcatactcacctcggggtcgcccgcagc	1	hsa-mir-151b,	hsa-mir-151b	acctctgatgtgtcagtctctcttcagggctcccgagacacagaaacagacacctgcccTCGAGGAGCTCACAGTCTagacaaacaaacccagggt	hsa-miR-151b	TCGAGGAGCTCACAGTCT	5'	Diff	gp2a	(((..((((..(.(((((.(((..(((.........((((((.((((((((((((..((((((((((............)))))))))).)))))))))))).))))))..)))...))).)).))))..))))..))).	139	60	-68.8	0.8	57	58	53.1239	62.2317	middle	0.037171	0.0242373
13	14	bta-let-7a-5p_L+1R-4	GTGAGGTAGTAGGTTGTAT	19	gi|347618775|ref|NC_010461.4|	-	51800803	51801061	ttctgctcatgccgggGTGAGGTAGTAAGTTGTATtgttgtggggtagggattttaggccccaattagaagataactatacaacttactactttccctggggtgtagcatgt	6	bta-let-7a-3,eca-let-7a-2,ggo-let-7a,ptr-let-7a-3,mmu-let-7c-2,mdo-let-7a-3,	bta-let-7a-3	gggTGAGGTAGTAGGTTGTATAGTTtggggctctgccctgctatgggataaCTATACAATCTACTGTCTTTCct	bta-let-7a-5p	TGAGGTAGTAGGTTGTATAGTT	5'	Diff	gp2a	...((((((..((((((.(((((((((((((((((.((((((((((...........)))))).........)))).)))))))))))))))))))))))..)).))))...	106	44.6	-50.9	1	5.5	16	5.12599	17.1674	middle	0.0018847	0.00174265
14	15	ssc-miR-92a_1ss22TA	TATTGCACTTGTCCCGGCCTGA	22	gi|347618775|ref|NC_010461.4|	-	126199400	126199661	caccctttcatccgtgggtggggatttgttgcattacttgtggtgtgtataaagTATTGCACTTGTCCCGGCCTGTggaagaaaggagg	55	ssc-mir-92a-2,ssc-mir-92a-1,ssc-mir-92b,bta-mir-92a-2,bta-mir-92a-1,bta-mir-92b,eca-mir-92a-2,eca-mir-92b,hsa-mir-92a-2,hsa-mir-92b,ggo-mir-92b,ptr-mir-92-2,ptr-mir-92b,ppy-mir-92b,mml-mir-92b,lca-mir-92-2,cgr-mir-92a,cgr-mir-92b,mmu-mir-92a-1,mmu-mir-92a-2,mmu-mir-92b,rno-mir-92a-1,rno-mir-92a-2,rno-mir-92b,mdo-mir-92,sha-mir-92a,oan-mir-92a-1,oan-mir-92a-2,oan-mir-92b,	ssc-mir-92a-1	ctttctacacaggttgggatcggttgcaatgctgtgtttctgtatggTATTGCACTTGTCCCGGCCTGTtgagtttggtg	ssc-miR-92a	TATTGCACTTGTCCCGGCCTGT	3'	Diff	gp2a	...((((((.((((..((..(((((..((.(((.(((((............))))).)))))..)))))..))..)))).))))))...	83	49.4	-40.6	0.9	118	150.5	109.976	161.481	middle	4.81e-07	4.23e-07
21	22	hsa-miR-4791_R-2	TGGATATGATGACTGA	16	gi|347618779|ref|NC_010457.4|	+	145943334	145943592	gttgcctgctgctgagtaaacgatgcTGGATATGATGACTGAttatctgagaaataactgatgaaatctcaagaaaattcctctagatagtcaagttctgatccagctaagttggctttgagcagcagtgttgc	2	hsa-mir-4791,ppy-mir-4791,	hsa-mir-4791	taagaacTGGATATGATGACTGAAAtaagctccatatcaatgagaatttcaatgggattatgtgcagtcaatgtccagtaatta	hsa-miR-4791	TGGATATGATGACTGAAA	5'	Diff	gp2a	(..(((((((((((((..(((...(((((((.....(((((((((((((((.(((......(((....))).....))).))).))))))))).)))...)))))))...)))..)))..)))))))).))..)	134	41	-46.8	0.9	9.5	15	8.85399	16.0944	middle	0.042231	0.0378021
28	30	ssc-let-7c_1ss17AG	TGAGGTAGTAGGTTGTGTGGTT	22	gi|347618781|ref|NC_010455.4|	+	191559231	191559492	acagtggaagctgtgtgcatccgggtTGAGGTAGTAGGTTGTATGGTTtagagttacaccgtgggagttaactgtacaaccttctagctttccttggagcacacttgagccatcga	21	ssc-let-7c,bta-let-7c,bta-let-7b,eca-let-7c,cfa-let-7c,cfa-let-7b,hsa-let-7b,ggo-let-7c,ggo-let-7b,ptr-let-7c,ptr-let-7b,ppy-let-7b,cgr-let-7c,cgr-let-7b,mmu-let-7c-1,mmu-let-7c-2,mmu-let-7b,mmu-let-7k,rno-let-7b,mdo-let-7b,oan-let-7b,	ssc-let-7c	tgtgtgcatccgggtTGAGGTAGTAGGTTGTATGGTTtagagttacaccgtgggagttaactgtacaaccttctagctttccttggagcacact	ssc-let-7c	TGAGGTAGTAGGTTGTATGGTT	5'	Diff	gp2a	...((((.....((((((.(((..(..(((.(((.((((((((..(((..((.(..(.....)..).)))))..)))))))).))).)))..)..))))))))).....))))...	110	48.3	-46.9	0.8	104422	139367	97320.7	149535	high	0	0
33	36	bta-miR-193b_R-5	AACTGGCCCACAAAGTCCC	19	gi|347618782|ref|NC_010454.3|	-	45164930	45165188	cgcgggagctgagggctgggtctttgcgggcgagatgagggtgttggttcAACTGGCCTACAAAGTCCCagtcctcggcccccagg	7	bta-mir-193b,eca-mir-193b,cfa-mir-193b,cgr-mir-193b,mmu-mir-193b,sha-mir-193,oan-mir-193,	bta-mir-193b	gtggtcccagaatcggggttttgagggcgagatgagtttatgttttatccAACTGGCCCACAAAGTCCCGCTTTtggggtcat	bta-miR-193b	AACTGGCCCACAAAGTCCCGCTTT	3'	Diff	gp2a	...(((.(((((((((((((.(((((..(((.((.((((........)))).)).)))..))))).))))))))))))).)))...	80	65.1	-54.3	1	12	53	11.184	56.8669	middle	7.08e-11	2.04e-11
35	38	mmu-miR-92a-3p_R+1	TATTGCACTTGTCCCGGCCTGA	22	gi|347618783|ref|NC_010453.4|	+	66610689	66610950	acacaggttgggatcggttgcaatgctgtgtttctgtatggTATTGCACTTGTCCCGGCCTGTtg	3	mmu-mir-92a-2,rno-mir-92a-2,oan-mir-92b,	mmu-mir-92a-2	tgcccattcatccacAGGTGGGGATTGGTGGCATTACttgtgttagatataaagTATTGCACTTGTCCCGGCCTGaggaagaaagagggtt	mmu-miR-92a-3p	TATTGCACTTGTCCCGGCCTG	3'	Diff	gp2a	..(((((..(((((..(.((((((((..((......))..)))))))))..)))))..)))))..	61	50.8	-33.8	1	115	144.5	107.18	155.043	middle	1.36e-06	9.74e-07
37	40	ssc-miR-181a_R+2	AACATTCAACGCTGTCGGTGAGTTTT	26	gi|347618784|ref|NC_010452.3|	-	26426954	26427219	tctgagtttagaggttgcttcagtgAACATTCAACGCTGTCGGTGAGTTTGgaattcaaatcaaaACCATCGACCGTTGATTGTACCctatggccaaccatcagctccac	57	ssc-mir-181a-1,ssc-mir-181a-2,ssc-mir-181b-2,ssc-mir-181b-1,ssc-mir-181d,bta-mir-181a-1,bta-mir-181a-2,bta-mir-181b-2,bta-mir-181b-1,bta-mir-181d,eca-mir-181a-2,eca-mir-181a,eca-mir-181b,cfa-mir-181a-1,cfa-mir-181a-2,cfa-mir-181b-2,cfa-mir-181b-1,cfa-mir-181d,hsa-mir-181a-1,hsa-mir-181a-2,hsa-mir-181b-1,hsa-mir-181d,ggo-mir-181a-1,ggo-mir-181a-2,ggo-mir-181d,ptr-mir-181b-2,ptr-mir-181b-1,ptr-mir-…	ssc-mir-181a-2	actccaaggAACATTCAACGCTGTCGGTGAGTTtgggatttgaaaaaaccaccgaccgttgactgtaccttggggttctt	ssc-miR-181a	AACATTCAACGCTGTCGGTGAGTT	5'	Diff	gp2a	...(((((..(((((((((..((...(((.((((((..(((((((.((((.((.......)).))))))))))))))))).)))...))..))).)))).)))))))...	104	45.5	-35	0.7	15.5	40	14.446	42.9184	middle	3.3e-06	1.77e-06
42	46	ssc-let-7a_L+1R-1	GTGAGGTAGTAGGTTGTATAGT	22	gi|347618785|ref|NC_010451.3|	-	54377991	54378252	gactgcatgttcccaggTTGAGGTAGTAGGTTGTATAGTttagaattgtatcaagggagataactgtacagcctcctagctttccttgggtcttgcacaa	90	ssc-let-7a-1,ssc-let-7a-2,ssc-let-7f-1,ssc-let-7c,ssc-let-7e,ssc-let-7f-2,ssc-let-7g,ssc-mir-98,ssc-let-7i,bta-let-7a-2,bta-let-7a-1,bta-let-7c,bta-let-7a-3,bta-let-7e,bta-let-7f-1,bta-let-7g,bta-mir-98,bta-let-7b,bta-mir-3596,bta-let-7i,eca-let-7c,eca-let-7e,eca-let-7a-2,eca-let-7f,eca-let-7g,eca-mir-98,cfa-let-7a-2,cfa-let-7a-1,cfa-let-7c,cfa-let-7e,cfa-let-7f,cfa-let-7g,cfa-mir-98,cfa-let-7b,h…	ssc-let-7a-2	cactgtgggaTGAGGTAGTAGGTTGTATAGTTttagggtcacacccaccactgggagataactatacaatctactgtctttcctaacgtgat	ssc-let-7a	TGAGGTAGTAGGTTGTATAGTT	5'	Diff	gp2a	...((((....((((((..(((.(((.((((((((((((.........((((......)))))))))))))))).))).)))..))))))...))))...	94	44	-39.8	0.9	2092	1946	1949.74	2087.98	middle	2.8e-21	2.36e-21
43	47	bta-miR-106b_R-4	TAAAGTGCTGACAGTGC	17	gi|347618785|ref|NC_010451.3|	-	54918744	54919005	tcTAAAGTGCTGACAGTGTctccgttgccaaccctcggagaggttaaagcattttcag	8	bta-mir-106b,eca-mir-106b,cfa-mir-106b,hsa-mir-106b,mml-mir-106b,lla-mir-106b,cgr-mir-106b,mmu-mir-106b,	bta-mir-106b	cctgccggggcTAAAGTGCTGACAGTGCAGATagtggtcctgtgtgctaccgcactgtgggtacttgctgctccggcagg	bta-miR-106b	TAAAGTGCTGACAGTGCAGAT	5'	Diff	gp2a	...((((((((...((..((((((...........))))))..))..))))))))...	52	48.3	-16.2	0.6	0	4	0	4.29184	low	0.020204	0.038547
44	48	mmu-mir-6243-p5	ATGTGCTTGGCTGAGGAGCCAATGGGGC	28	gi|347618785|ref|NC_010451.3|	-	116865094	116865353	tATGTGCTTGACTGAGGAGCCAATGGGGCaaagctgccaTCTGTGGGATTATGACTGAAtgtctttaagtcagaatcccacccaggcagaac	1	mmu-mir-6243,	mmu-mir-6243	tatgtgcttggctgaggagccaatggggcgaagctACCATCTGTGGGATTATGACTGAACGcctctaatcctgcccaggcagcgccgaaggagcctcggttggccccggatagccgggtcccgtccgtcccagctcagcgg	mmu-mir-6243-p5	atgtgcttggctgaggagccaatggggc	5'	Yes	gp2a	..................(((.....)))....(((((....((((((((.(((((...........))))).))))))))...)))))...	11	48.9	-30.9	0.7	384	438	357.888	469.957	middle	5.33e-13	4.37e-13
44	49	mmu-miR-6243_L-4R-2	TCTGTGGGATTATGACTGAA	20	gi|347618785|ref|NC_010451.3|	-	116865094	116865353	tATGTGCTTGACTGAGGAGCCAATGGGGCaaagctgccaTCTGTGGGATTATGACTGAAtgtctttaagtcagaatcccacccaggcagaac	1	mmu-mir-6243,	mmu-mir-6243	tatgtgcttggctgaggagccaatggggcgaagctACCATCTGTGGGATTATGACTGAACGcctctaatcctgcccaggcagcgccgaaggagcctcggttggccccggatagccgggtcccgtccgtcccagctcagcgg	mmu-miR-6243	ACCATCTGTGGGATTATGACTGAACG	3'	Diff	gp2a	..................(((.....)))....(((((....((((((((.(((((...........))))).))))))))...)))))...	11	48.9	-30.9	0.7	1214	3716	1131.45	3987.12	middle	0	0
48	54	mmu-miR-5097_L-7_1ss17AG	TCCCTGTTCGGGCGCCA	17	gi|347618786|ref|NC_010450.3|	+	56667912	56668169	atacattacctcttctccggTCCCTGTTCGGGCGCCActtgccgaggtccagccccagcagccagggagtgccgaaggagaggatgggc	1	mmu-mir-5097,	mmu-mir-5097	ggggttcggacagatgggcatggagtcggtgggaattaacagacatctgagggtccaggGTTCATGTCCCTGTTCAGGCGCCA	mmu-miR-5097	GTTCATGTCCCTGTTCAGGCGCCA	5'	Diff	gp2a	...(((..((((((((.(((((((((((.((((...((((....))))...)))).)))....))))...)))).)))))))))))...	83	64	-34.7	0.6	86	95.5	80.1519	102.468	middle	0.0013264	0.000967217
52	59	mmu-miR-5097_L-7_1ss17AG	TCCCTGTTCGGGCGCCA	17	gi|347618787|ref|NC_010449.4|	-	131734903	131735158	ttacctcttctccggTCCCTGTTCGGGCGCCActtgccgaggtccagccccagcagccagggagtgccgaaggagaggatg	1	mmu-mir-5097,	mmu-mir-5097	ggggttcggacagatgggcatggagtcggtgggaattaacagacatctgagggtccaggGTTCATGTCCCTGTTCAGGCGCCA	mmu-miR-5097	GTTCATGTCCCTGTTCAGGCGCCA	5'	Diff	gp2a	...((((((((.(((((((((((.((((...((((....))))...)))).)))....))))...)))).))))))))...	75	65.4	-34.3	0.6	86	95.5	80.1519	102.468	middle	0.0013264	0.000967217
60	68	hsa-mir-4419a-p5_1ss20GC	GCTACTCGGGAGGCTGAGGC	20	gi|347618789|ref|NC_010447.4|	+	90996606	90996865	tggagcgtgcctgtagtcccaGCTACTCGGGAGGCTGAGGCtGGAGGATCGCTTGAGCccaggagttctgggctgcagtgcgctgtg	6	hsa-mir-4419a,hsa-mir-1268a,hsa-mir-1273f,hsa-mir-1254-1,ptr-mir-1254,ppy-mir-1268,	hsa-mir-4419a	tggtggtgtgtgcctgtagtcttagctactcgggaggcTGAGGGAGGAGACTGCAgtgagtggaggtcacgccactg	hsa-mir-4419a-p5	gctactcgggaggcTGAGGG	5'	Diff	gp2a	...((((..(.(((((.(((((..((((....((((.((((.........)))).))))...)))).)))))))))))..))))...	81	64.4	-42.1	0.8	25	70	23.3	75.1072	middle	1.63e-10	8.41e-11
62	71	bta-miR-200a_R-2	TAACACTGTCTGGTAACGATG	21	gi|347618789|ref|NC_010447.4|	-	66193600	66193860	gacgcctgtcgccggctctgggtccatcttccagcacagtgttggatggtctaatagtgaagctccTAACACTGTCTGGTAAAGATGgcccccggccggcgccctcggcaat	26	bta-mir-141,bta-mir-200a,eca-mir-141,eca-mir-200a,cfa-mir-141,cfa-mir-200a,hsa-mir-141,hsa-mir-200a,ggo-mir-141,ggo-mir-200a,ppa-mir-141,ptr-mir-141-2,ptr-mir-200a,ppy-mir-141,ppy-mir-200a,mml-mir-141,mml-mir-200a,cgr-mir-141,mmu-mir-141,rno-mir-141,rno-mir-200a,mdo-mir-141,mdo-mir-200a,sha-mir-141,sha-mir-200a,oan-mir-200a,	bta-mir-200a	gggcctctgtggacatcttaccggacagtgctggatttctcggctcgactcTAACACTGTCTGGTAACGATGTTcaaaggtgaccc	bta-miR-200a	TAACACTGTCTGGTAACGATGTT	3'	Diff	gp2a	...(((...((((((((..(((.(((((((((((.(((((((((((...((.......))...))).))))))))))))..))))))))))..)))))))).....)))...	106	59.8	-58.2	0.9	1984	1859	1849.09	1994.63	middle	2.9e-21	2.23e-21
63	72	bta-miR-200c_1ss17TC	TAATACTGCCGGGTAACGATGGA	23	gi|347618789|ref|NC_010447.4|	-	66194012	66194274	ggtggcggggtgggggcccccgtcttacccagcagtgtttgggtgctgcttgcgagtctcTAATACTGCCGGGTAATGATGGAggcccctgcccctgtgccagc	27	ssc-mir-429,bta-mir-200c,bta-mir-429,eca-mir-200b,eca-mir-429,cfa-mir-200b,cfa-mir-429,hsa-mir-200c,hsa-mir-200b,ggo-mir-200c,ggo-mir-200b,ptr-mir-200c,cgr-mir-200c,cgr-mir-200b,cgr-mir-429,mmu-mir-200c,mmu-mir-200b,mmu-mir-429,rno-mir-200b,rno-mir-429,mdo-mir-200c,mdo-mir-200b,mdo-mir-429,sha-mir-200c,sha-mir-200b,oan-mir-200b,oan-mir-429,	bta-mir-200c	cgtcttacccagcagtgtttgggtgctggttgggagtctcTAATACTGCCGGGTAATGATGGAgg	bta-miR-200c	TAATACTGCCGGGTAATGATGGA	3'	Diff	gp2a	..((((((((..((((((.(((((((((((.((((((((.((((((.....)))...))).)))))))).)))))).))))).))))))..))))...))))..	100	65.4	-67	1	48	55	44.7359	59.0128	middle	0.009948	0.0072936
67	76	hsa-miR-1260a_R+2_1ss9TG	ATCCCACCGCTGCCACCAAT	20	gi|347618790|ref|NC_010446.4|	-	120602780	120603039	cATCCCACCCCTGCCACCAATcccaaaggcctctctgactcccctgcaggcagtggacagggtgggctt	3	hsa-mir-1260a,ppy-mir-1260a,cgr-mir-1260,	hsa-mir-1260a	acctttccagctcATCCCACCTCTGCCACCAaaacactcatcgcggggtcagagggagtgccaaaaaaggtaa	hsa-miR-1260a	ATCCCACCTCTGCCACCA	5'	Diff	gp2a	...(((((((.((((((....((...(((.............)))...))..)))).)))))))))...	63	63.8	-23.6	0.5	29.5	34.5	27.494	37.0171	middle	0.034558	0.0205712
69	78	ssc-let-7f_L+1R-1_1ss13AG	GTGAGGTAGTAGGTTGTATAGT	22	gi|347618791|ref|NC_010445.3|	+	44864689	44864950	agattgctctatcagaGTGAGGTAGTAGATTGTATAGTtgtggggtagtgattttaccctgttcaggagataactatacaatctattgccttccctgagga	20	ssc-let-7f-2,ssc-let-7f-1,bta-let-7f-1,bta-let-7a-3,eca-let-7f,eca-let-7a-2,cfa-let-7f,ggo-let-7a,ggo-let-7f,ptr-let-7f-1,ptr-let-7f-2,ptr-let-7a-3,cgr-let-7f,mmu-let-7f-1,mmu-let-7c-2,mdo-let-7f-2,mdo-let-7a-3,oan-let-7f-2,oan-let-7f-1,oan-let-7e,	ssc-let-7f-1	tgtgggaTGAGGTAGTAGATTGTATAGTTttagggtcataccccatcttggagataactatacagtctactgtctttcccacg	ssc-let-7f	TGAGGTAGTAGATTGTATAGTT	5'	Diff	gp2a	.......(((.((((...((((((((((((((((((((((((((((((.....))))))).........)))))))))))))))))))))))..)))))))	94	40.6	-42.6	1	2088.5	1955	1946.48	2097.64	middle	3.72e-22	2.73e-22
70	79	cgr-mir-1285-p5_1ss5TC	CTCCCGTGCTGATCAGTA	18	gi|347618791|ref|NC_010445.3|	+	106666103	106666360	gaaacagaggttaaagCTCCCGTGCTGATCAGTAgtgggatcagtctgtgaatagccactgcacaccagcctgggcagcatctcttctgtttg	4	cgr-mir-1285,	cgr-mir-1285	ggtcagaactcctgtgctgatcagtaagtagtgggatggtgtctgtgcatagctacTGCACTCCAGCCTGGGCAACATAGtgagacctcg	cgr-mir-1285-p5	ctcctgtgctgatcagta	5'	Diff	gp2a	.(((((((((.....((((((..((((....(((((((..(((.....)))....)))))))....))))..))).)))....))))))))).	91	51.6	-35.3	0.7	6	51	5.59199	54.721	middle	3.96e-13	6.52e-14
71	80	oan-miR-1329-5p_1ss2AC	TCCAGTGATCAGGTTACGATGG	22	gi|347618791|ref|NC_010445.3|	+	134560279	134560540	ctggttgtagggaTCCAGTGATCAGGTTACGATGGatttctcaagtggcaacctcgtagcttgctcaccaaatccctataacacg	1	oan-mir-1329,	oan-mir-1329	gaggaatctcaatctggttgtaggggTACAGTGATCAGGTTACGATGGatttctcaagtaacaaCCTCGTAGCTCGGTCACGATAtccatatgactcgaagagcaacaattttggtcccgttcctc	oan-miR-1329-5p	TACAGTGATCAGGTTACGATGG	5'	Diff	gp2a	...(((((((((((...((((.((((((((((.((...((......))...)))))))))))).))))...)))))))))))...	79	48.2	-36.8	0.9	1	7	0.931999	7.51072	low	0.0090072	0.00810578
76	85	hsa-miR-181a-5p_R+3	AACATTCAACGCTGTCGGTGAGTTTT	26	gi|347618793|ref|NC_010443.4|	+	299322041	299322306	tcagagaactccaaggAACATTCAACGCTGTCGGTGAGTTTGggatttgaaaaaACCACCGACCGTTGACTGTACCttggggttcttact	6	hsa-mir-181a-2,ggo-mir-181a-2,mml-mir-181a-2,mne-mir-181a-2,sla-mir-181a-2,sha-mir-181a-2,	hsa-mir-181a-2	agaagggctatcaggccagccttcagaggactccaaggAACATTCAACGCTGTCGGTGAGTttgggatttgaaaaaACCACTGACCGTTGACTGTACCttggggtcctta	hsa-miR-181a-5p	AACATTCAACGCTGTCGGTGAGT	5'	Diff	gp2a	...(((((((((((((.(((.((((((..(((((((.((((...........))))))))))))))))).))).)))))))))))))...	84	46.7	-46.3	1.1	15.5	40	14.446	42.9184	middle	3.3e-06	1.77e-06
79	89	ssc-miR-34a_L-5	GTGTCTTAGCTGGTTGT	17	gi|347618793|ref|NC_010443.4|	-	7830213	7830472	gactaacaggactttgacactgcctctcgacttaggctGTGTCTTAGCTGGTTGAaa	14	ssc-mir-34a,bta-mir-34a,eca-mir-34a,cfa-mir-34a,hsa-mir-34a,ppa-mir-34a,mml-mir-34a,age-mir-34a,lla-mir-34a,sla-mir-34a,cgr-mir-34a,mmu-mir-34a,rno-mir-34a,mdo-mir-34a,	ssc-mir-34a	tttcttTGGCAGTGTCTTAGCTGGTTGTtgtgagtaatagcaaaggaagcaatcagcagcatcctgccctagaaca	ssc-miR-34a	TGGCAGTGTCTTAGCTGGTTGT	3'	Diff	gp2a	...((((..(.((..(((((.((((........)))).)))))..)))..))))...	51	47.4	-18.3	0.7	1	9	0.931999	9.65665	low	0.00213	0.00191636
80	90	mmu-miR-6243_L-4R-3_1ss5TC	CCTGTGGGATTATGACTGA	19	gi|347618793|ref|NC_010443.4|	-	42027862	42028120	ctcctaCCTGTGGGATTATGACTTAatacctctgggccagaatcccactcaggtagatc	1	mmu-mir-6243,	mmu-mir-6243	tatgtgcttggctgaggagccaatggggcgaagctACCATCTGTGGGATTATGACTGAACGcctctaatcctgcccaggcagcgccgaaggagcctcggttggccccggatagccgggtcccgtccgtcccagctcagcgg	mmu-miR-6243	ACCATCTGTGGGATTATGACTGAACG	5'	Diff	gp2a	...((((((((((((((.((.(..(.......)..).)).))))))))..))))))...	53	49.2	-21.3	0.7	0	5	0	5.3648	low	0.009413	0.01708
83	94	bta-miR-25_R-3_1ss19CA	CATTGCACTTGTCTCGGTA	19	gi|347618793|ref|NC_010443.4|	-	176858672	176858930	ttaatgcctagattattcgtcaatgatctaacaaggttttcagagtaacattttagggatctataaagccatatcttagtctcctttgtctctgttttctctctttgtatttagattttCATTGCACTTGTCTCGGGAtaaa	8	bta-mir-25,eca-mir-25,cfa-mir-25,ptr-mir-25,cgr-mir-25,rno-mir-25,mdo-mir-25,sha-mir-25,	bta-mir-25	ggccagtgttgagaggcggagacttgggcaattgctggacgctgccccgggCATTGCACTTGTCTCGGTCTGAcagtgccggcc	bta-miR-25	CATTGCACTTGTCTCGGTCTGA	3'	Diff	gp2a	...((.((.((((.....((((((((((((((((((....(((((..(((....(((((.(((.............)))..)))))))))))))........))))))...))))...)))))).))..)))).)).))...	136	33.1	-27.1	0.6	35	52	32.62	55.794	middle	0.00037395	0.000314166
1	1	hsa-let-7b-5p_R+1	TGAGGTAGTAGGTTGTGTGGTTA	23					cggggTGAGGTAGTAGGTTGTGTGGTTtcagggcagtgatgttgcccctcggaagataaCTATACAACCTACTGCCTTCCCtg	94	hsa-let-7b,ssc-let-7c,ssc-let-7f-1,ssc-let-7a-1,ssc-let-7a-2,ssc-let-7g,ssc-mir-98,ssc-let-7f-2,ssc-let-7e,ssc-let-7d,bta-let-7b,bta-let-7c,bta-let-7a-2,bta-let-7a-1,bta-let-7a-3,bta-let-7g,bta-let-7f-1,bta-let-7e,bta-mir-98,eca-let-7c,eca-let-7a-2,eca-let-7g,eca-mir-98,eca-let-7e,eca-let-7f,cfa-let-7b,cfa-let-7c,cfa-let-7a-2,cfa-let-7a-1,cfa-let-7g,cfa-mir-98,cfa-let-7f,cfa-let-7e,cfa-let-7j,hsa…	hsa-let-7b	cggggTGAGGTAGTAGGTTGTGTGGTTtcagggcagtgatgttgcccctcggaagataaCTATACAACCTACTGCCTTCCCtg	hsa-let-7b-5p	TGAGGTAGTAGGTTGTGTGGTT	5'	Diff	gp3a	(((((.(((((((((((((((((((((...((((((.....)))))).((....)).))))))))))))))))))))))))))	83	53	-50.6	1.2	21169.5	22390.5	19730	24024.1	high	0	0
1	2	hsa-let-7b-3p_1ss22CT	CTATACAACCTACTGCCTTCCT	22					cggggTGAGGTAGTAGGTTGTGTGGTTtcagggcagtgatgttgcccctcggaagataaCTATACAACCTACTGCCTTCCCtg	94	hsa-let-7b,ssc-let-7c,ssc-let-7f-1,ssc-let-7a-1,ssc-let-7a-2,ssc-let-7g,ssc-mir-98,ssc-let-7f-2,ssc-let-7e,ssc-let-7d,bta-let-7b,bta-let-7c,bta-let-7a-2,bta-let-7a-1,bta-let-7a-3,bta-let-7g,bta-let-7f-1,bta-let-7e,bta-mir-98,eca-let-7c,eca-let-7a-2,eca-let-7g,eca-mir-98,eca-let-7e,eca-let-7f,cfa-let-7b,cfa-let-7c,cfa-let-7a-2,cfa-let-7a-1,cfa-let-7g,cfa-mir-98,cfa-let-7f,cfa-let-7e,cfa-let-7j,hsa…	hsa-let-7b	cggggTGAGGTAGTAGGTTGTGTGGTTtcagggcagtgatgttgcccctcggaagataaCTATACAACCTACTGCCTTCCCtg	hsa-let-7b-3p	CTATACAACCTACTGCCTTCCC	3'	Diff	gp3a	(((((.(((((((((((((((((((((...((((((.....)))))).((....)).))))))))))))))))))))))))))	83	53	-50.6	1.2	1450	1709	1351.4	1833.69	middle	2.62e-51	3.69e-51
5	7	rno-miR-125b-2-3p	ACAAGTCAGGCTCTTGGGACCT	22					accagacttttcctagTCCCTGAGACCCTAACTTGTGAggtattttagtaacatcACAAGTCAGGCTCTTGGGACCTaggcggagagg	31	rno-mir-125b-2,ssc-mir-125b-1,ssc-mir-125b-2,ssc-mir-125a,bta-mir-125b-1,bta-mir-125b-2,bta-mir-125a,eca-mir-125b-2,eca-mir-125b,eca-mir-125a,cfa-mir-125b-1,cfa-mir-125b-2,cfa-mir-125a,hsa-mir-125b-1,hsa-mir-125a,ggo-mir-125a,ppa-mir-125b,mml-mir-125a,cgr-mir-125b,cgr-mir-125a,mmu-mir-125b-1,mmu-mir-125b-2,mmu-mir-125a,rno-mir-125b-1,rno-mir-125a,mdo-mir-125b-1,mdo-mir-125b-2,sha-mir-125b,sha-mir…	rno-mir-125b-2	accagacttttcctagTCCCTGAGACCCTAACTTGTGAggtattttagtaacatcACAAGTCAGGCTCTTGGGACCTaggcggagagg	rno-miR-125b-2-3p	ACAAGTCAGGCTCTTGGGACCT	3'	Yes	gp3a	.((...(((..(((((..((..(((.(((.((((((((..(((....)))...)))))))).))).)))..))..)))))..))).))	87	48.9	-37.3	0.9	2959	2546	2757.78	2731.76	middle	4.11e-16	2.81e-16
8	12	rno-miR-30a-5p_L+2R+2	ATTGTAAACATCCTCGACTGGAAGCT	26					gcaacTGTAAACATCCTCGACTGGAAGctgtgaagccacaaatgggCTTTCAGTCGGATGTTTGCAGCtgc	28	rno-mir-30a,ssc-mir-30a,ssc-mir-30e,ssc-mir-30d,bta-mir-30a,bta-mir-30d,bta-mir-30e,eca-mir-30d,eca-mir-30e,cfa-mir-30a,cfa-mir-30d,hsa-mir-30a,hsa-mir-30d,ggo-mir-30e,ptr-mir-30e,mml-mir-30a,mml-mir-30d,mml-mir-30e,cgr-mir-30a,cgr-mir-30e,mmu-mir-30a,mmu-mir-30e,mmu-mir-30d,mdo-mir-30a,sha-mir-30e,oan-mir-30a,oan-mir-30d,oan-mir-30e,	rno-mir-30a	gcaacTGTAAACATCCTCGACTGGAAGctgtgaagccacaaatgggCTTTCAGTCGGATGTTTGCAGCtgc	rno-miR-30a-5p	TGTAAACATCCTCGACTGGAAG	5'	Diff	gp3a	(((.((((((((((((..((((((((((((((....))).....))))))))))))))))))))))).)))	71	50.7	-38	1.1	5.5	10.5	5.12599	11.2661	middle	0.046562	0.0431921
20	27	rno-miR-30a-5p_L+2R+2	ATTGTAAACATCCTCGACTGGAAGCT	26					gcaacTGTAAACATCCTCGACTGGAAGctgtgaagccacaaatgggCTTTCAGTCGGATGTTTGCAGCtgc	16	rno-mir-30a,ssc-mir-30a,ssc-mir-30e,cfa-mir-30e,hsa-mir-30a,hsa-mir-30d,mml-mir-30a,cgr-mir-30a,cgr-mir-30e,cgr-mir-30d,mmu-mir-30a,mmu-mir-30e,mmu-mir-30d,oan-mir-30a,oan-mir-30e,oan-mir-30d,	rno-mir-30a	gcaacTGTAAACATCCTCGACTGGAAGctgtgaagccacaaatgggCTTTCAGTCGGATGTTTGCAGCtgc	rno-miR-30a-5p	TGTAAACATCCTCGACTGGAAG	5'	Diff	gp3a	(((.((((((((((((..((((((((((((((....))).....))))))))))))))))))))))).)))	71	50.7	-38	1.1	5.5	10.5	5.12599	11.2661	middle	0.046562	0.0431921
13	18	hsa-miR-200a-5p	CATCTTACCGGACAGTGCTGGA	22					gggcctctgtggacatcttaccggacagtgctggatttctcggctcgactcTAACACTGTCTGGTAACGATGTTcaaaggtgaccc	26	bta-mir-200a,bta-mir-141,eca-mir-200a,eca-mir-141,cfa-mir-141,hsa-mir-200a,hsa-mir-141,ggo-mir-200a,ggo-mir-141,ppa-mir-141,ptr-mir-200a,ptr-mir-141-2,ppy-mir-200a,ppy-mir-141,mml-mir-200a,mml-mir-141,cgr-mir-141,mmu-mir-141,rno-mir-200a,rno-mir-141,mdo-mir-200a,mdo-mir-141,sha-mir-200a,sha-mir-141,oan-mir-200a,	hsa-mir-200a	ccgggcccctgtgagCATCTTACCGGACAGTGCTGGAtttcccagcttgactcTAACACTGTCTGGTAACGATGTtcaaaggtgacccgc	hsa-miR-200a-5p	CATCTTACCGGACAGTGCTGGA	5'	Yes	gp3a	(((..(((.(((((((((((((((((((((.((((....(((...))).)))).))))))))))))).)))))))).)))...)))	86	53.5	-39.6	0.9	489	646.5	455.747	693.669	middle	6.82e-28	7.15e-28
13	19	bta-miR-200a_R-1	TAACACTGTCTGGTAACGATGT	22					gggcctctgtggacatcttaccggacagtgctggatttctcggctcgactcTAACACTGTCTGGTAACGATGTTcaaaggtgaccc	26	bta-mir-200a,bta-mir-141,eca-mir-200a,eca-mir-141,cfa-mir-141,hsa-mir-200a,hsa-mir-141,ggo-mir-200a,ggo-mir-141,ppa-mir-141,ptr-mir-200a,ptr-mir-141-2,ppy-mir-200a,ppy-mir-141,mml-mir-200a,mml-mir-141,cgr-mir-141,mmu-mir-141,rno-mir-200a,rno-mir-141,mdo-mir-200a,mdo-mir-141,sha-mir-200a,sha-mir-141,oan-mir-200a,	bta-mir-200a	gggcctctgtggacatcttaccggacagtgctggatttctcggctcgactcTAACACTGTCTGGTAACGATGTTcaaaggtgaccc	bta-miR-200a	TAACACTGTCTGGTAACGATGTT	3'	Diff	gp3a	(((..(((.(((((((((((((((((((((.((((....(((...))).)))).))))))))))))).)))))))).)))...)))	86	53.5	-39.6	0.9	6662	6929.5	6208.98	7435.08	middle	0	5.72e-126
19	26	mmu-miR-92a-3p_R+2	TATTGCACTTGTCCCGGCCTGAA	23					tgcccattcatccacAGGTGGGGATTGGTGGCATTACttgtgttagatataaagTATTGCACTTGTCCCGGCCTGaggaagaaagagggtt	22	mmu-mir-92a-2,ssc-mir-92a-2,ssc-mir-92a-1,bta-mir-92a-2,bta-mir-92a-1,eca-mir-92a-2,hsa-mir-92a-2,ptr-mir-92-2,lca-mir-92-2,cgr-mir-92a,mmu-mir-92a-1,rno-mir-92a-2,rno-mir-92a-1,mdo-mir-92,sha-mir-92a,oan-mir-92a-1,oan-mir-92a-2,oan-mir-92b,	mmu-mir-92a-1	ctttctacacAGGTTGGGATTTGTCGCAATGCTgtgtttctctgtatggTATTGCACTTGTCCCGGCCTGttgagtttgg	mmu-miR-92a-3p	TATTGCACTTGTCCCGGCCTG	3'	Diff	gp3a	.((((.(((.(((.((((..(((((..((.(((.(((((((((...)))))).))).)))))..)))))..)))).))).)))...)))).	89	47.3	-37.9	0.9	87.5	139	81.5499	149.142	middle	5e-10	5.26e-10
21	28	mmu-miR-101c_R+2	ACAGTACTGTGATAACTGATT	21					tgatgccctactgcacagtcctgtgatgactgactgctcaactgcACAGTACTGTGATAACTGAtcgcctaactg	20	mmu-mir-101c,ssc-mir-101-2,ssc-mir-101-2,ssc-mir-101-1,ssc-mir-101-1,bta-mir-101-2,bta-mir-101-2,bta-mir-101-1,bta-mir-101-1,eca-mir-101-2,eca-mir-101-2,hsa-mir-101-1,hsa-mir-101-1,ggo-mir-101,ggo-mir-101,ptr-mir-101-2,ptr-mir-101-2,cgr-mir-101b,cgr-mir-101b,mmu-mir-101b,mmu-mir-101b,rno-mir-101b,rno-mir-101b,mdo-mir-101-2,mdo-mir-101-2,mdo-mir-101-1,mdo-mir-101-1,sha-mir-101,sha-mir-101,oan-mir-…	mmu-mir-101c	tgatgccctactgcacagtcctgtgatgactgactgctcaactgcACAGTACTGTGATAACTGAtcgcctaactg	mmu-miR-101c	ACAGTACTGTGATAACTGA	3'	Diff	gp3a	.(((.........((((((.(((((.....(((....)))....))))).)))))).......))).........	43	49.3	-16.3	0.4	0	5	0	5.3648	low	0.009413	0.01708
24	31	ssc-miR-34a	TGGCAGTGTCTTAGCTGGTTGT	22					tttcttTGGCAGTGTCTTAGCTGGTTGTtgtgagtaatagcaaaggaagcaatcagcagcatcctgccctagaaca	14	ssc-mir-34a,bta-mir-34a,eca-mir-34a,cfa-mir-34a,hsa-mir-34a,ppa-mir-34a,mml-mir-34a,age-mir-34a,lla-mir-34a,sla-mir-34a,cgr-mir-34a,mmu-mir-34a,rno-mir-34a,mdo-mir-34a,	ssc-mir-34a	tttcttTGGCAGTGTCTTAGCTGGTTGTtgtgagtaatagcaaaggaagcaatcagcagcatcctgccctagaaca	ssc-miR-34a	TGGCAGTGTCTTAGCTGGTTGT	5'	Yes	gp3a	.((((..(((((..(((..((((((((((..................)))))))))))).)..)))))..))))..	73	44.7	-24.1	0.7	3955	4811	3686.06	5162.01	middle	0	1.49e-154
25	33	oan-miR-29a-3p_R+3	TAGCACCATTTGAAATCGGTTAGA	24					tcaaaggctcctgtgacccctctagaggatgACTGATTTCTTTTGGTGTTCAGagtcaatatcattttcTAGCACCATTTGAAATCGGTTataatgattggggaatagcgccacgtga	15	oan-mir-29a-1,ssc-mir-29b-1,ssc-mir-29b-2,bta-mir-29b-2,bta-mir-29b-1,cgr-mir-29c,cgr-mir-29b,mmu-mir-29b-1,rno-mir-29b-1,mdo-mir-29b,oan-mir-29a-2,oan-mir-29b-2,oan-mir-29b-1,	oan-mir-29a-2	caggacccatctcttacacaggcTGACCGATTTCTCTTGGTGTTcagagtctcagttcttgtcTAGCACCATTTGAAATCGGTTatgatgtagggggaaaagcagcagtcctg	oan-miR-29a-3p	TAGCACCATTTGAAATCGGTT	3'	Diff	gp3a	(((..(((..((((..((((........((((((((((((...(((((((.((((...........)))))))))))...)))))))))))).......)))).)))).)))...)))	64	42.4	-42.5	0.8	3	21	2.796	22.5322	middle	6.08e-06	3.68e-06
26	34	oan-miR-429-3p_R+2	TAATACTGTCTGGTAATGCCGTAA	24					cggcgtggaggtgcctgctgattggtgTCTTACCAGACAAAGTTAGATctgactattttcgtcTAATACTGTCTGGTAATGCCGTcaatcacagcggcaagatcttcgtctg	13	oan-mir-429,ssc-mir-429,bta-mir-429,eca-mir-429,cfa-mir-429,hsa-mir-429,ggo-mir-429,ppy-mir-429,mml-mir-429,cgr-mir-429,mmu-mir-429,rno-mir-429,mdo-mir-429,	oan-mir-429	cggcgtggaggtgcctgctgattggtgTCTTACCAGACAAAGTTAGATctgactattttcgtcTAATACTGTCTGGTAATGCCGTcaatcacagcggcaagatcttcgtctg	oan-miR-429-3p	TAATACTGTCTGGTAATGCCGT	3'	Diff	gp3a	.((((..((..((((.((((((((..(..((((((((((..(((((((..((....))..)))))))..))))))))))...)..))))))..))))))...))..))))..	109	48.2	-44.7	0.8	64	74	59.6479	79.3991	middle	0.0023915	0.00201168
27	35	mdo-miR-200b_L+4	ATTCTAATACTGCCTGGTAATGATGA	26					ccatcttactgggcagcattggatggtgtctgtgtttcTAATACTGCCTGGTAATGATGAtgatgggg	13	mdo-mir-200b,bta-mir-200c,eca-mir-200b,hsa-mir-200b,hsa-mir-200c,ggo-mir-200c,ptr-mir-200c,cgr-mir-200c,mmu-mir-200b,mmu-mir-200c,mdo-mir-200c,sha-mir-200b,sha-mir-200c,	mdo-mir-200b	ccatcttactgggcagcattggatggtgtctgtgtttcTAATACTGCCTGGTAATGATGAtgatgggg	mdo-miR-200b	TAATACTGCCTGGTAATGATGA	3'	Diff	gp3a	.((((((((..(((((.((((((.............)))))).)))))..)))).)))).........	58	47.1	-25.6	0.8	0	5.33333	0	5.72246	low	0.0073219	0.00756809
28	36	hsa-miR-93-5p	CAAAGTGCTGTTCGTGCAGGTAG	23					ctgggggctcCAAAGTGCTGTTCGTGCAGGTAGtgtgattacccaacctACTGCTGAGCTAGCACTTCCCGagcccccgg	13	hsa-mir-93,bta-mir-93,eca-mir-93,cfa-mir-93,ggo-mir-93,mml-mir-93,age-mir-93,lla-mir-93,cgr-mir-93,mmu-mir-93,rno-mir-93,mdo-mir-93,sha-mir-93,	hsa-mir-93	ctgggggctcCAAAGTGCTGTTCGTGCAGGTAGtgtgattacccaacctACTGCTGAGCTAGCACTTCCCGagcccccgg	hsa-miR-93-5p	CAAAGTGCTGTTCGTGCAGGTAG	5'	Yes	gp3a	((((((((((..((((((((((((.((((.(((..((......))..)))))))))))).)))))))...))))))))))	80	60	-44.8	0.9	7281	20595	6785.88	22097.6	high	0	0
33	45	hsa-miR-33a-3p_R-1_1ss3AG	CAGTGTTTCCACAGTGCATCA	21					ctgcgGTGCATTGTAGTTGCATTGCAtgttctggcggtacccgtgcaatgtttccacagtgcatcacag	12	bta-mir-33a,eca-mir-33a,cfa-mir-33a,hsa-mir-33a,ppy-mir-33a,mml-mir-33a,cgr-mir-33,mmu-mir-33,rno-mir-33,mdo-mir-33,oan-mir-33a,	hsa-mir-33a	ctgtgGTGCATTGTAGTTGCATTGCAtgttctggtggtacccatgCAATGTTTCCACAGTGCATCACag	hsa-miR-33a-3p	CAATGTTTCCACAGTGCATCAC	3'	Diff	gp3a	(((.((((((((((....((((((((((....((.....))))))))))))....)))))))))).)))	69	52.2	-30.6	0.8	0	6	0	6.43776	low	0.0044478	0.00756808
35	49	oar-miR-299-3p	TATGTGGGACGGTAAACCGCTT	22					aagaaaTGGTTTACCGTCCCACATACATtctgaatatgtatgtgggacggtaaaccgcttctt	11	bta-mir-299,ssc-mir-299,oar-mir-299,cfa-mir-299,hsa-mir-299,ggo-mir-299,ptr-mir-299,ppy-mir-299,mml-mir-299,mmu-mir-299b,rno-mir-299b,	oar-mir-299	tgccatcgtgcggtacttgaagaaaTGGTTTACCGTCCCACATACATtctgaatatgTATGTGGGACGGTAAACCGCTTcttggtatcctgcccagccatcaaa	oar-miR-299-3p	TATGTGGGACGGTAAACCGCTT	3'	Yes	gp3a	(((((..(((((((((((((((((((((.......)))))))))))))))))))))..)))))	63	41.3	-41.9	1.6	78	77.5	72.6959	83.1544	middle	0.023007	0.0158103
38	53	ppy-miR-331-3p_R+5	GCCCCTGGGCCTATCCTAGACAA	23					gagtttggttttgtttgggtttgttCTAGGTATGGTCCCAGGGATCCcagatcaaaccagGCCCCTGGGCCTATCCTAaacaacctaa	11	ppy-mir-331,ssc-mir-331,bta-mir-331,eca-mir-331,hsa-mir-331,ggo-mir-331,ptr-mir-331,mml-mir-331,cgr-mir-331,mmu-mir-331,rno-mir-331,	ppy-mir-331	gagtttggttttgtttgggtttgttCTAGGTATGGTCCCAGGGATCCcagatcaaaccagGCCCCTGGGCCTATCCTAaacaacctaa	ppy-miR-331-3p	GCCCCTGGGCCTATCCTA	3'	Diff	gp3a	..............(((((.(((((.((((.((((.(((((((..(.............)..))))))).))))))))))))))))))	74	48.9	-30.9	0.7	0	9	0	9.65665	low	0.00049433	0.000291727
43	59	mmu-miR-543-5p_2ss11CT14GC	AAGTTGCCCGTGTCTTTTTCG	21					ggtgcttaaggagaagttgcccgtgtctttttcgctttatatgtgacgAAACATTCGCGGTGCACTTCTTtttcagtatc	10	bta-mir-543,oar-mir-543,eca-mir-543,cfa-mir-543,hsa-mir-543,ggo-mir-543,ptr-mir-543,mml-mir-543,mmu-mir-543,rno-mir-543,	mmu-mir-543	tgcttaatgagAAGTTGCCCGCGTGTTTTTCGctttatatgtgacgAAACATTCGCGGTGCACTTCTTtttcagca	mmu-miR-543-5p	AAGTTGCCCGCGTGTTTTTCG	5'	Diff	gp3a	((((((.((..((((((.(((((((..((((((((.......)))).))))....))))).))))))))..)).))))))	80	43.8	-29	0.8	0	7	0	7.51072	low	0.0021232	0.00148587
43	60	bta-miR-543	AAACATTCGCGGTGCACTTCTT	22					ggtgcttaaggagaagttgcccgtgtctttttcgctttatatgtgacgAAACATTCGCGGTGCACTTCTTtttcagtatc	10	bta-mir-543,oar-mir-543,eca-mir-543,cfa-mir-543,hsa-mir-543,ggo-mir-543,ptr-mir-543,mml-mir-543,mmu-mir-543,rno-mir-543,	bta-mir-543	ggtgcttaaggagaagttgcccgtgtctttttcgctttatatgtgacgAAACATTCGCGGTGCACTTCTTtttcagtatc	bta-miR-543	AAACATTCGCGGTGCACTTCTT	3'	Yes	gp3a	((((((.((..((((((.(((((((..((((((((.......)))).))))....))))).))))))))..)).))))))	80	43.8	-29	0.8	12	36	11.184	38.6266	middle	2.33e-06	1.24e-06
44	61	oan-mir-150-p5_1ss4CT	GCCTCTCGGCGCCCCC	16					cgcccctcggcgcccccTCTCCCAACCCTTGTACCAGAGcataaactgaaccCCTGGTACGGGGCCGTGGGAGAGggggagccggggccccgcg	10	oan-mir-150,bta-mir-150,eca-mir-150,cfa-mir-150,hsa-mir-150,ggo-mir-150,ptr-mir-150,mmu-mir-150,rno-mir-150,mdo-mir-150,	oan-mir-150	cgcccctcggcgcccccTCTCCCAACCCTTGTACCAGAGcataaactgaaccCCTGGTACGGGGCCGTGGGAGAGggggagccggggccccgcg	oan-mir-150-p5	gcccctcggcgccccc	5'	Diff	gp3a	(((.(((((((.((((((((((((..((..(((((((................)))))))..))...)))))))))))).)))))))....)))	94	72.3	-61.2	0.9	2	6.5	1.864	6.97424	low	0.038384	0.0455467
47	65	bta-miR-22-5p_R-1	AGTTCTTCAGTGGCAAGCTTT	21					ggctgagccgcagtAGTTCTTCAGTGGCAAGCTTTAtgtcctgacccagctaAAGCTGCCAGTTGAAGAACTGttgccctctgcc	10	bta-mir-22,ssc-mir-22,cfa-mir-22,ggo-mir-22,sla-mir-22,cgr-mir-22,mmu-mir-22,rno-mir-22,mdo-mir-22,oan-mir-22,	bta-mir-22	ggctgagccgcagtAGTTCTTCAGTGGCAAGCTTTAtgtcctgacccagctaAAGCTGCCAGTTGAAGAACTGttgccctctgcc	bta-miR-22-5p	AGTTCTTCAGTGGCAAGCTTTA	5'	Diff	gp3a	(((.(((..(((..(((((((((((((((.((((((.((.........))))))))))))).))))))))))..))).))).)))	85	54.1	-39.7	0.9	661	876	616.051	939.913	middle	2.03e-37	2.42e-37
47	66	bta-miR-22-3p_R+1	AAGCTGCCAGTTGAAGAACTGT	22					ggctgagccgcagtAGTTCTTCAGTGGCAAGCTTTAtgtcctgacccagctaAAGCTGCCAGTTGAAGAACTGttgccctctgcc	10	bta-mir-22,ssc-mir-22,cfa-mir-22,ggo-mir-22,sla-mir-22,cgr-mir-22,mmu-mir-22,rno-mir-22,mdo-mir-22,oan-mir-22,	bta-mir-22	ggctgagccgcagtAGTTCTTCAGTGGCAAGCTTTAtgtcctgacccagctaAAGCTGCCAGTTGAAGAACTGttgccctctgcc	bta-miR-22-3p	AAGCTGCCAGTTGAAGAACTG	3'	Diff	gp3a	(((.(((..(((..(((((((((((((((.((((((.((.........))))))))))))).))))))))))..))).))).)))	85	54.1	-39.7	0.9	5000	4379	4659.99	4698.49	middle	1.55e-30	1.45e-30
48	68	ssc-miR-342_R-1	TCTCACACAGAAATCGCACCCGTC	24					aaggtgagggtgctatctgtgactgagggacatggcgcatagaactgTCTCACACAGAAATCGCACCCGTCAccttggcc	9	ssc-mir-342,bta-mir-342,eca-mir-342,cfa-mir-342,hsa-mir-342,ggo-mir-342,ptr-mir-342,cgr-mir-342,mmu-mir-342,	ssc-mir-342	aaggtgagggtgctatctgtgactgagggacatggcgcatagaactgTCTCACACAGAAATCGCACCCGTCAccttggcc	ssc-miR-342	TCTCACACAGAAATCGCACCCGTCA	3'	Diff	gp3a	(((((((((((((..((((((.....((((((.............)))))).))))))....)))))).)))))))....	76	55	-32.8	0.7	841	679	783.811	728.54	middle	0.002491	0.00134855
50	70	cgr-miR-1260_L-2	CCCACCGCTGCCACCA	16					acttgggaaATCCCACCGCTGCCACCAaataaagtgaaacacagtaaatggggatcgctatggagtcaaagcaagtttga	9	cgr-mir-1260,bta-mir-1260b,hsa-mir-1260b,hsa-mir-1260a,ggo-mir-1260b,ptr-mir-1260b,ppy-mir-1260b,ppy-mir-1260a,mml-mir-1260b,	cgr-mir-1260	acttgggaaATCCCACCGCTGCCACCAaataaagtgaaacacagtaaatggggatcgctatggagtcaaagcaagtttga	cgr-miR-1260	ATCCCACCGCTGCCACCA	5'	Diff	gp3a	...((((....))))..(((.((.(((..((..(((...)))..))..)))))...(((.((....)).))).)))....	32	45	-14.5	0.4	506	568	471.591	609.442	middle	1.39e-15	1.44e-15
52	72	bta-miR-758_1ss22CT	TTTGTGACCTGGTCCACTAACT	22					gcctgggtacatgagatggttgaccagagagcacacgctttatttgtgccgTTTGTGACCTGGTCCACTAACCctcagtatctaatcc	9	bta-mir-758,ssc-mir-758,oar-mir-758,eca-mir-758,cfa-mir-758,hsa-mir-758,ptr-mir-758,mmu-mir-758,rno-mir-758,	bta-mir-758	gcctgggtacatgagatggttgaccagagagcacacgctttatttgtgccgTTTGTGACCTGGTCCACTAACCctcagtatctaatcc	bta-miR-758	TTTGTGACCTGGTCCACTAACC	3'	Diff	gp3a	...(((((((.((((.((((.((((((...(((.((((.........).))).)))...)))))).))))...)))))))))))....	81	50	-28.9	0.7	9	15	8.38799	16.0944	middle	0.032803	0.0229281
55	76	hsa-miR-106b-5p_R+1	TAAAGTGCTGACAGTGCAGATA	22					cctgccggggcTAAAGTGCTGACAGTGCAGATagtggtcctctccgtgctaCCGCACTGTGGGTACTTGCTGCtccagcagg	8	hsa-mir-106b,bta-mir-106b,eca-mir-106b,cfa-mir-106b,mml-mir-106b,lla-mir-106b,cgr-mir-106b,mmu-mir-106b,	hsa-mir-106b	cctgccggggcTAAAGTGCTGACAGTGCAGATagtggtcctctccgtgctaCCGCACTGTGGGTACTTGCTGCtccagcagg	hsa-miR-106b-5p	TAAAGTGCTGACAGTGCAGAT	5'	Diff	gp3a	(((((.(((((..((((((..(((((((...((((((......))..))))..)))))))..))))))...))))).)))))	82	61	-41.7	0.8	2860	4653	2665.52	4992.49	middle	0	1.16e-295
55	77	hsa-miR-106b-3p_R-2	CCGCACTGTGGGTACTTGCT	20					cctgccggggcTAAAGTGCTGACAGTGCAGATagtggtcctctccgtgctaCCGCACTGTGGGTACTTGCTGCtccagcagg	8	hsa-mir-106b,bta-mir-106b,eca-mir-106b,cfa-mir-106b,mml-mir-106b,lla-mir-106b,cgr-mir-106b,mmu-mir-106b,	hsa-mir-106b	cctgccggggcTAAAGTGCTGACAGTGCAGATagtggtcctctccgtgctaCCGCACTGTGGGTACTTGCTGCtccagcagg	hsa-miR-106b-3p	CCGCACTGTGGGTACTTGCTGC	3'	Diff	gp3a	(((((.(((((..((((((..(((((((...((((((......))..))))..)))))))..))))))...))))).)))))	82	61	-41.7	0.8	658	542	613.255	581.545	middle	0.0023948	0.00125946
61	87	eca-miR-494_R+1	TGAAACATACACGGGAAACCTCT	23					gatactcgaaggagaggttgtccgtgttgtcttctctttatttatgaTGAAACATACACGGGAAACCTCttttttagtatc	8	eca-mir-494,bta-mir-494,oar-mir-494,ggo-mir-494,ptr-mir-494,mml-mir-494,mmu-mir-494,rno-mir-494,	eca-mir-494	gatactcgaaggagaggttgtccgtgttgtcttctctttatttatgaTGAAACATACACGGGAAACCTCttttttagtatc	eca-miR-494	TGAAACATACACGGGAAACCTC	3'	Diff	gp3a	((((((.(((..(((((((..(((((((((.(((((.........)).)))))).))))))..)))))))..)))))))))	81	38.3	-33.2	1.1	7	20	6.52399	21.4592	middle	0.00056522	0.000975914
63	90	sha-miR-21_L+2R-3	AATAGCTTATCAGACTGATGTTGA	24					aattgatcaatgtatgttccatcaatcctgcttgaatatccactttgtacccatcatcgtctgtgacatctccatggctgtaccgtcctgtcagaTAGCTTATCAGACTGATGTTGACTGttggatctcatggcaacagcagtcgatggg	8	sha-mir-21,ssc-mir-21,bta-mir-21,cfa-mir-21,hsa-mir-21,mmu-mir-21a,mdo-mir-21,oan-mir-21,	sha-mir-21	aattgatcaatgtatgttccatcaatcctgcttgaatatccactttgtacccatcatcgtctgtgacatctccatggctgtaccgtcctgtcagaTAGCTTATCAGACTGATGTTGACTGttggatctcatggcaacagcagtcgatggg	sha-miR-21	TAGCTTATCAGACTGATGTTGACTG	3'	Diff	gp3a	..........((.((((((...((....))...)))))).)).......(((((((((((((((((.((((.((.(((......))).))..))))...))).))))).))))..((((((((..((....))...)))))))).)))))	59	44.7	-33.9	0.5	28	34	26.096	36.4807	middle	0.025912	0.0203884
64	92	bta-miR-193b_R-2	AACTGGCCCACAAAGTCCCGCT	22					gtggtcccagaatcggggttttgagggcgagatgagtttatgttttatccAACTGGCCCACAAAGTCCCGCTTTtggggtcat	8	bta-mir-193b,eca-mir-193b,hsa-mir-193b,ptr-mir-193b,cgr-mir-193b,mmu-mir-193b,sha-mir-193,oan-mir-193,	bta-mir-193b	gtggtcccagaatcggggttttgagggcgagatgagtttatgttttatccAACTGGCCCACAAAGTCCCGCTTTtggggtcat	bta-miR-193b	AACTGGCCCACAAAGTCCCGCTTT	3'	Diff	gp3a	(((..(((((((.((((..((((.((((.((.((..(.........)..)).)).)))).))))..)))).)))))))..)))	83	50.6	-41.2	1	3467.5	3185.5	3231.71	3417.92	middle	2.51e-31	2.47e-31
65	93	ggo-miR-484_R+1	TCAGGCTCAGTCCCCTCCCGAT	22					ctcgcggccctgcagcctcgTCAGGCTCAGTCCCCTCCCGAtaaacccctaaatagggactttcccggggggtgaccctggcttttttggcgaaaacccccagtttaagg	8	ggo-mir-484,bta-mir-484,hsa-mir-484,ptr-mir-484,mml-mir-484,cgr-mir-484,mmu-mir-484,rno-mir-484,	ggo-mir-484	ctcgcggccctgcagcctcgTCAGGCTCAGTCCCCTCCCGAtaaacccctaaatagggactttcccggggggtgaccctggcttttttggcgaaaacccccagtttaagg	ggo-miR-484	TCAGGCTCAGTCCCCTCCCGA	5'	Diff	gp3a	.(((((((......)))..((((((....(((.(((((((..(((.((((....))))..)))..))))))).))))))))).......)))).................	63	60	-37.8	0.6	93	387.5	86.6759	415.772	middle	2.12e-67	1.52e-70
69	99	mml-miR-299-3p	TATGTGGGACGGTAAACCGCTT	22					aagaaaTGGTTTACCGTCCCACATACATtttcaatatgTATGTGGGACGGTAAACCGCTTctt	9	mml-mir-299,oar-mir-299,eca-mir-299,hsa-mir-299,ppy-mir-299,mmu-mir-299b,rno-mir-299b,	mml-mir-299	aagaaaTGGTTTACCGTCCCACATACATtttcaatatgTATGTGGGACGGTAAACCGCTTctt	mml-miR-299-3p	TATGTGGGACGGTAAACCGCTT	3'	Yes	gp3a	(((((..(((((((((((((((((((((.......)))))))))))))))))))))..)))))	63	39.7	-41.9	1.7	78	77.5	72.6959	83.1544	middle	0.023007	0.0158103
79	112	cgr-miR-193b-3p	AACTGGCCCACAAAGTCCCGCT	22					gcccagaatCGGGGTTTTGAGGGCGAGATGAgtttgtgttttatccAACTGGCCCACAAAGTCCCGCTtttggggtca	6	cgr-mir-193b,cfa-mir-193b,hsa-mir-193b,ggo-mir-193b,mmu-mir-193b,oan-mir-193,	cgr-mir-193b	gcccagaatCGGGGTTTTGAGGGCGAGATGAgtttgtgttttatccAACTGGCCCACAAAGTCCCGCTtttggggtca	cgr-miR-193b-3p	AACTGGCCCACAAAGTCCCGCT	3'	Yes	gp3a	.(((((((.((((..((((.((((.((.((..(.........)..)).)).)))).))))..)))).)))))))....	73	52.6	-35.5	0.9	3467.5	3185.5	3231.71	3417.92	middle	2.51e-31	2.47e-31
82	116	bta-miR-33b_R-1	GTGCATTGCTGTTGCATTG	19					gcgggcggccccgcgGTGCATTGCTGTTGCATTGCatgtgtgaggcaggtgcagtgcctcggcagtgcagcccggagccggcccctggcaccgc	6	bta-mir-33b,eca-mir-33b,cfa-mir-33b,hsa-mir-33b,ptr-mir-33b,mml-mir-33b,	bta-mir-33b	gcgggcggccccgcgGTGCATTGCTGTTGCATTGCatgtgtgaggcaggtgcagtgcctcggcagtgcagcccggagccggcccctggcaccgc	bta-miR-33b	GTGCATTGCTGTTGCATTGC	5'	Diff	gp3a	((((.((((.(((.((((((((((((..((((((((..((.....))..))))))))..)))))))))).))))).))))(((...))).))))	94	72.3	-55.7	0.8	10	57	9.31999	61.1588	middle	7.13e-13	1.03e-13
83	118	bta-miR-339b_R+2	TCCCTGTCCTCCAGGAGCTCGA	22					TCCCTGTCCTCCAGGAGCTCcaggtctggggtgggtgtggggatttctgcaggaggga	6	bta-mir-339b,bta-mir-339a,hsa-mir-339,ppy-mir-339,mml-mir-339,rno-mir-3586,	bta-mir-339a	ggggcagccgctgTCCCTGTCCTCCAGGAGCTCacttggtccggccgtgcgctcctcgaggccagagcccgtgtctgc	bta-miR-339b	TCCCTGTCCTCCAGGAGCTC	5'	Diff	gp3a	((((..((((.(((((((((((..(((.....)))..))))).)))))).))))))))	58	63.8	-25.2	0.7	0	4	0	4.29184	low	0.020204	0.038547
87	123	mmu-let-7j_1ss8TG	TGAGGTAGTAGTTTGTGCTGTTAT	24					attggaggctatttctgatcatgataatttccTGAGGTATTAGTTTGTGCTGTTATatgaatcgaataatatcccttgctcagattaaaagcctggagttaaaaaaatcaagtgccttgaac	6	mmu-let-7j,ssc-let-7i,bta-let-7i,ggo-let-7i,ptr-let-7i,sha-let-7i,	mmu-let-7j	attggaggctatttctgatcatgataatttccTGAGGTATTAGTTTGTGCTGTTATatgaatcgaataatatcccttgctcagattaaaagcctggagttaaaaaaatcaagtgccttgaac	mmu-let-7j	TGAGGTATTAGTTTGTGCTGTTAT	5'	Diff	gp3a	....(((((.(((..((((.....(((((((...((((.((((((((.((....((((..........)))).....)).))))))))..))))))))))).....))))))))))))....	114	34.4	-23.3	0.6	152	167	141.664	179.184	middle	3.178e-05	2.47e-05
88	124	cfa-mir-660-p3_1ss7AT	GTGTGCTTGGATTACA	16					TACCCATTGCATATCGGAGTTGtgaattctcaaagcacctcctgtgtgcatggattaca	6	cfa-mir-660,eca-mir-660,hsa-mir-660,ggo-mir-660,ptr-mir-660,mml-mir-660,	cfa-mir-660	TACCCATTGCATATCGGAGTTGtgaattctcaaagcacctcctgtgtgcatggattaca	cfa-mir-660-p3	gtgtgcatggattaca	3'	Diff	gp3a	...(((.((((((..((((.(((...........))).))))..)))))))))......	50	44.1	-19	0.7	21	364	19.572	390.558	middle	0	2.5e-110
90	126	oan-miR-200b-3p_L+4R-1	ATTCTAATACTGCCTGGTAATGATGA	26					tctggattcagggccgccactacCATCTTACTGGGCAGCATTGGatgagttctgtgtttcTAATACTGCCTGGTAATGATGATggccgcggcccatacgcaacaacaga	5	oan-mir-200b,cfa-mir-200b,hsa-mir-200b,mmu-mir-200b,rno-mir-200b,	oan-mir-200b	tctggattcagggccgccactacCATCTTACTGGGCAGCATTGGatgagttctgtgtttcTAATACTGCCTGGTAATGATGATggccgcggcccatacgcaacaacaga	oan-miR-200b-3p	TAATACTGCCTGGTAATGATGAT	3'	Diff	gp3a	..........(((((((..(((.((((((((..(((((.((((((.............)))))).)))))..)))).)))).)))..)))))))...............	84	51.4	-45.6	0.8	0	3.83333	0	4.11302	low	0.022988	0.038547
119	161	oan-miR-200b-3p_L+4R-1	ATTCTAATACTGCCTGGTAATGATGA	26					tctggattcagggccgccactacCATCTTACTGGGCAGCATTGGatgagttctgtgtttcTAATACTGCCTGGTAATGATGATggccgcggcccatacgcaacaacaga	4	oan-mir-200b,ggo-mir-200b,cgr-mir-200b,rno-mir-200b,	oan-mir-200b	tctggattcagggccgccactacCATCTTACTGGGCAGCATTGGatgagttctgtgtttcTAATACTGCCTGGTAATGATGATggccgcggcccatacgcaacaacaga	oan-miR-200b-3p	TAATACTGCCTGGTAATGATGAT	3'	Diff	gp3a	..........(((((((..(((.((((((((..(((((.((((((.............)))))).)))))..)))).)))).)))..)))))))...............	84	51.4	-45.6	0.8	0	3.83333	0	4.11302	low	0.022988	0.038547
93	129	cfa-miR-200a	CATCTTACCGGACAGTGCTGGA	22					ctgggcctctgtgggCATCTTACCGGACAGTGCTGGAtttcttggcttgactctaacactgtctggtaacgatgttcaaaggtgacccac	5	cfa-mir-200a,hsa-mir-200a,rno-mir-200a,mdo-mir-200a,oan-mir-200a,	cfa-mir-200a	ctgggcctctgtgggCATCTTACCGGACAGTGCTGGAtttcttggcttgactctaacactgtctggtaacgatgttcaaaggtgacccac	cfa-miR-200a	CATCTTACCGGACAGTGCTGGA	5'	Yes	gp3a	.((((..(((.((..(((((((((((((((((.((((..((.......)).)))).))))))))))))).))))..)).)))...)))).	88	52.2	-41.8	0.9	489	646.5	455.747	693.669	middle	6.82e-28	7.15e-28
93	130	hsa-miR-200a-3p	TAACACTGTCTGGTAACGATGT	22					ctgggcctctgtgggCATCTTACCGGACAGTGCTGGAtttcttggcttgactctaacactgtctggtaacgatgttcaaaggtgacccac	5	cfa-mir-200a,hsa-mir-200a,rno-mir-200a,mdo-mir-200a,oan-mir-200a,	hsa-mir-200a	ccgggcccctgtgagCATCTTACCGGACAGTGCTGGAtttcccagcttgactcTAACACTGTCTGGTAACGATGTtcaaaggtgacccgc	hsa-miR-200a-3p	TAACACTGTCTGGTAACGATGT	3'	Yes	gp3a	.((((..(((.((..(((((((((((((((((.((((..((.......)).)))).))))))))))))).))))..)).)))...)))).	88	52.2	-41.8	0.9	6662	6927.5	6208.98	7432.93	middle	0	8.65e-126
104	144	bta-miR-1247-5p	ACCCGTCCCGTGCGTCCCCGGA	22					cgccgggcgcACCCGTCCCGTGCGTCCCCGGAcgtcgctgtctgcccCGGGAACGTCGGGACTGGAGCgcccgcgctg	4	bta-mir-1247,hsa-mir-1247,ptr-mir-1247,mmu-mir-1247,	bta-mir-1247	cgccgggcgcACCCGTCCCGTGCGTCCCCGGAcgtcgctgtctgcccCGGGAACGTCGGGACTGGAGCgcccgcgctg	bta-miR-1247-5p	ACCCGTCCCGTGCGTCCCCGGA	5'	Yes	gp3a	.(((((((((.((.((((((.((((.(((((.....((.....)).))))).)))))))))).)).))))))).))..	75	79.5	-50.4	0.8	4	16	3.728	17.1674	middle	0.00049599	0.000676293
121	163	hsa-miR-1277-5p_L-3R+2	TATATATATATATGTACGTATGA	23					acctcccaaatatatatatatatgtacgtatgtgtatatgaatgtaTACGTAGATATATATGTATTTTtggtgggttt	4	bta-mir-1277,ssc-mir-1277,hsa-mir-1277,ggo-mir-1277,	hsa-mir-1277	acctcccAAATATATATATATATGTACGTATgtgtatataaatgtaTACGTAGATATATATGTATTTTtggtgggttt	hsa-miR-1277-5p	AAATATATATATATATGTACGTAT	5'	Diff	gp3a	(((..(((((.((((((((((((.((((((((..(......)..)))))))).)))))))))))).)))))..)))..	76	26.9	-34.6	1.7	13	30.5	12.116	32.7253	middle	0.00011113	7.57e-05
158	205	hsa-mir-5100-p3_1ss15TC	CCCAGCGGTGCCTCCA	16					ccatgaggagctggcagtgggatggcctgggggtaggagcgtggcttctggagctagaccacatgggTTCAGATCCCAGCGGTGCCTCTaactggccacaggaccttgggcagtcagct	2	hsa-mir-5100,mmu-mir-5100,	hsa-mir-5100	ccatgaggagctggcagtgggatggcctgggggtaggagcgtggcttctggagctagaccacatgggTTCAGATCCCAGCGGTGCCTCTaactggccacaggaccttgggcagtcagct	hsa-mir-5100-p3	CCCAGCGGTGCCTCTa	3'	Diff	gp3a	........(((((((.(((((.(((((((((((((...((.(((..((((((.(((.......))).))))))..)))))..))))))))...))))).....)))...)).)))))))	111	62.2	-46.5	0.6	230	266	214.36	285.408	middle	8.42e-09	6.37e-09
167	214	ppy-mir-1268-p3_1ss12TC	TCCCAGCTACTCGGGAGG	18					tagcCGGGCGTGGTGGTGGGCGcctgtggtcccagctacttgggaggctgag	3	ppy-mir-1268,hsa-mir-1268a,	ppy-mir-1268	tagcCGGGCGTGGTGGTGGGCGcctgtggtcccagctacttgggaggctgag	ppy-mir-1268-p3	tcccagctacttgggagg	3'	Diff	gp3a	(((((.(((((........))))).....((((((....)))))))))))..	18	69.2	-20.7	0.6	0	10	0	10.7296	middle	0.00024042	0.000129263
182	231	mmu-mir-467g-p5_1ss13AG	ATGTGTGTGTGTGTATATATAT	22					gtcttgtgcatgcatatatatatatgtgtgtgtgtatatatatatacatatatatacatacatacacatgtatatgtataTATACATACACACACATATATatattcatgtatatatata	2	mmu-mir-467g,mmu-mir-669f,	mmu-mir-467g	gtcttgtgcatgcatatatatatatgtgtgtgtgtatatatatatacatatatatacatacatacacatgtatatgtataTATACATACACACACATATATatattcatgtatatatata	mmu-mir-467g-p5	atgtgtgtgtgtatatatatat	5'	Diff	gp3a	....(((..((((((..((((((((((((((((((((.(((((((((((((((((............))))))))))))))))).))))))))))))))))))))..))))))..)))..	114	21.7	-50.7	1.9	0	5	0	5.3648	low	0.009413	0.01708
232	288	hsa-mir-3168-p5_1ss13AC	AGTTCTACAGTCCGACA	17					aagatcatGAGTTCTACAGTCAGACagcctgagttggaggctcatcttcacttcttgctgtgtgaccctgggccagtgactt	1	hsa-mir-3168,	hsa-mir-3168	aagatcatGAGTTCTACAGTCAGACagcctgagttggaggctcatcttcacttcttgctgtgtgaccctgggccagtgactt	hsa-mir-3168-p5	AGTTCTACAGTCAGACa	5'	Diff	gp3a	(((.((((..(..(....((((.(((((..((..((((((....))))))..))..))))).))))...)..)..)))))))	82	50	-28.2	0.7	2	9	1.864	9.65665	low	0.0069403	0.00689259
245	303	mmu-miR-2137_R-1_1ss16AG	GCCGGCGGGAGCCCCGGGGA	20					gtagtatacctccttcctgctgccttgttggcttGCCGGCGGGAGCCCCAGGGAGtagagcattgc	1	mmu-mir-2137,	mmu-mir-2137	gtagtatacctccttcctgctgccttgttggcttGCCGGCGGGAGCCCCAGGGAGtagagcattgc	mmu-miR-2137	GCCGGCGGGAGCCCCAGGGAG	3'	Diff	gp3a	...(((...((((((((((..(((..(..((....))..)..).))..)))))))..)))...)))	63	60.6	-23.2	0.6	52	332	48.4639	356.223	middle	3.95e-70	5.59e-76
254	314	hsa-miR-5701_L-2_1ss10CT	ATTGTCATGTTCTGATT	17					gattggactTTATTGTCACGTTCTGATTggttagcctaagacttgttctgatccaatcagaacatgaaaataacgtccaatc	2	hsa-mir-5701-1,	hsa-mir-5701-1	gattggactTTATTGTCACGTTCTGATTggttagcctaagacttgttctgatccaatcagaacatgaaaataacgtccaatc	hsa-miR-5701	TTATTGTCACGTTCTGATT	5'	Diff	gp3a	((((((((.(((((.(((.(((((((((((((((..(((...)))..)))).))))))))))).))).))))).))))))))	82	37.8	-35.6	1.1	9	17	8.38799	18.2403	middle	0.011975	0.00910963
265	325	ssc-mir-494-p3	TGAAACATACACGGGAAACCTCT	23					ctcgaaggagAGGTTGTCGTGTTGTCTTCTCTttacttatgatgaaacatacacgggaaacctcttttggagtat	1	ssc-mir-494,	ssc-mir-494	ctcgaaggagAGGTTGTCGTGTTGTCTTCTCTttacttatgatgaaacatacacgggaaacctcttttggagtat	ssc-mir-494-p3	tgaaacatacacgggaaacctct	3'	Yes	gp3a	(((.((.((((((((.(((((((((.(((((.........)).)))))).))))))..)))))))))).)))...	72	41.3	-24.3	0.8	7	20	6.52399	21.4592	middle	0.00056522	0.000975914
275	336	hsa-miR-4443_R-1	TTGGAGGCGTGGGTTT	16					ggtgggggTTGGAGGCGTGGGTTTTagaacctatccctttctagccctgagca	1	hsa-mir-4443,	hsa-mir-4443	ggtgggggTTGGAGGCGTGGGTTTTagaacctatccctttctagccctgagca	hsa-miR-4443	TTGGAGGCGTGGGTTTT	5'	Diff	gp3a	.((.(((((((((((..((((((....))))))..))..)))))))))..)).	51	56.6	-23.1	0.8	17	26	15.844	27.897	middle	0.0095429	0.00768848
285	347	cfa-mir-300-p3_1ss21CG	TATGCAAGGACAAGCTCTCTGC	22					gctacTTGAAGAGAGGTTATCCTTCGTgtgtttgtatgattgtaatgaatatgcaaggacaagctctctccgaggagc	1	cfa-mir-300,	cfa-mir-300	gctacTTGAAGAGAGGTTATCCTTCGTgtgtttgtatgattgtaatgaatatgcaaggacaagctctctccgaggagc	cfa-mir-300-p3	tatgcaaggacaagctctctcc	3'	Diff	gp3a	(((.((((.((((((.((.(((((.(..((((..(.........)..))))..)))))).)).)))))).)))).)))	78	43.6	-29.8	0.9	2	7	1.864	7.51072	low	0.027311	0.0246957
304	367	hsa-miR-4508_R-1	GCGGGGCTGGGCGCGC	16					aggacccaGCGGGGCTGGGCGCGCGgagcagcgctgggtgcagcgcctgcgccggcagctgcaagggccg	1	hsa-mir-4508,	hsa-mir-4508	aggacccaGCGGGGCTGGGCGCGCGgagcagcgctgggtgcagcgcctgcgccggcagctgcaagggccg	hsa-miR-4508	GCGGGGCTGGGCGCGCG	5'	Diff	gp3a	.((.(((.((((.(((.((((((.((.((.((((...)))).)).)))))))))))..))))..))))).	68	80	-37.5	0.7	18	85	16.776	91.2017	middle	4.48e-17	1.04e-17
306	370	hsa-mir-3676-p3_1ss16GA	CCCAGCGGTGCCTCCA	16					ttggttaaagcgcctgtctagtaaacAGGAGATCCTGGGTTcgaatcccagcggtgcctCCGTGTTTCCCCCACGCTTTtgccaa	1	hsa-mir-3676,	hsa-mir-3676	ttggttaaagcgcctgtctagtaaacAGGAGATCCTGGGTTcgaatcccagcggtgcctCCGTGTTTCCCCCACGCTTTtgccaa	hsa-mir-3676-p3	cccagcggtgcctCCG	3'	Diff	gp3a	((((..((((((..((......(((((((((((((((((.......))))).)))..)))).)))))....))))))))..))))	85	54.1	-27.9	0.6	111	195	103.452	209.227	middle	8.51e-16	5.89e-16
313	377	hsa-miR-4792_L+1R+1_1ss10GT	CCGGTGAGCTCTCGCTGGCC	20					gcagccCGGTGAGCGCTCGCTGGCctggcagtgcgtcggaagaacagggcgggtggggccgcgcacatctctgc	1	hsa-mir-4792,	hsa-mir-4792	gcagccCGGTGAGCGCTCGCTGGCctggcagtgcgtcggaagaacagggcgggtggggccgcgcacatctctgc	hsa-miR-4792	CGGTGAGCGCTCGCTGGC	5'	Diff	gp3a	((((...((((.((((..(((.(((((.(..((..((....)).))..))))))..))).)))).)))).))))	74	73	-28.9	0.5	42	153	39.144	164.163	middle	1.34e-25	1.54e-26
318	383	sha-mir-5105-p3_1ss13AG	CGGTGTGAGGCCGGTA	16					agcgccaaatccctgccccgcggtggggcgcaagccatgtggtgtagggaagacccactccctggtgccactctcggtgggggcccaagtccttctgattGAGGCACAGCCCATGGACGgtgtgaggccagtagtggcccccggcatgct	1	sha-mir-5105,	sha-mir-5105	agcgccaaatccctgccccgcggtggggcgcaagccatgtggtgtagggaagacccactccctggtgccactctcggtgggggcccaagtccttctgattGAGGCACAGCCCATGGACGgtgtgaggccagtagtggcccccggcatgct	sha-mir-5105-p3	CGgtgtgaggccagta	3'	Diff	gp3a	((((((...(((((((.(((((....(((....))).))))).)))))))....(((((..(((((..(((((((..((((.(((..((((.....))))..)))....))))..)).)).)))..))))).))))).....)))..)))	83	66	-62.7	0.6	51	1333	47.5319	1430.26	middle	0	0
321	387	ssc-mir-484-p5	TCAGGCTCAGTCCCCTCCCGAT	22					gcagccatcgtcaggctcagtcccctcccgataaacccctaaatagggaccttCCCAGGGGGCGACCCAGGCTtttttggcaa	1	ssc-mir-484,	ssc-mir-484	gcagccatcgtcaggctcagtcccctcccgataaacccctaaatagggaccttCCCAGGGGGCGACCCAGGCTtttttggcaa	ssc-mir-484-p5	tcaggctcagtcccctcccgat	5'	Yes	gp3a	...((((..(((.((.((.(((((((...((.....((((....))))....))..))))))))).)).))).....))))..	78	59	-29	0.6	92	386.5	85.7439	414.699	middle	1.55e-67	8.82e-71
372	441	hsa-mir-4787-p5_1ss3GC	GTCGCGGGGGTGGCGGC	17					cggtccagacgtgGCGGGGGTGGCGGCGGCATCCCggacggcctgtgaggGATGCGCCGCCCACTGCCCCGCGCcgcctgaccg	1	hsa-mir-4787,	hsa-mir-4787	cggtccagacgtgGCGGGGGTGGCGGCGGCATCCCggacggcctgtgaggGATGCGCCGCCCACTGCCCCGCGCcgcctgaccg	hsa-mir-4787-p5	gtgGCGGGGGTGGCGGC	5'	Diff	gp3a	((((.(((..(((((((((((((((((.(((((((..((.....))..)))))))))))))....))))).)))))))))))))	84	79.8	-56	0.8	10	43	9.31999	46.1373	middle	5.56e-09	2.11e-09
381	451	hsa-miR-4532_R-1_1ss3CT	CCTCGGGGAGCCCGGC	16					acagaCCCCGGGGAGCCCGGCGgtgaagctcctggtatcctgggtgtctga	1	hsa-mir-4532,	hsa-mir-4532	acagaCCCCGGGGAGCCCGGCGgtgaagctcctggtatcctgggtgtctga	hsa-miR-4532	CCCCGGGGAGCCCGGCG	5'	Diff	gp3a	.(((((((((((..(((.((.((.....)))).)))..)))))).))))).	49	66.7	-27.5	0.8	16	24	14.912	25.7511	middle	0.014632	0.0107258
389	460	hsa-mir-3178-p5_1ss16TA	CGGGGCGCGGCCGGAA	16					gaggctgggcGGGGCGCGGCCGGATCGgtcgagagcgtcctggctgatgacggtctcccgtgcccacgccccaaacgcagtctc	1	hsa-mir-3178,	hsa-mir-3178	gaggctgggcGGGGCGCGGCCGGATCGgtcgagagcgtcctggctgatgacggtctcccgtgcccacgccccaaacgcagtctc	hsa-mir-3178-p5	cGGGGCGCGGCCGGAT	5'	Diff	gp3a	(((((((((((((((((((..((((((.(((..(((......)))..))))))))).)))))))).))))).......))))))	84	72.6	-45.3	0.7	9	281	8.38799	301.502	middle	1.18e-78	3.18e-94
393	464	mmu-mir-1983-p5_1ss2GA	AAAAAGCATGCTCCAGTGGCGC	22					cctttacagagaaagcatgctccagtggcgcaatcggttagcgcgcggtacttatacagcagtatatgtgcgggtgatgccgaggttgtgagttcgagcCTCACCTGGAGCATGTTTTCTtccctttccgcc	1	mmu-mir-1983,	mmu-mir-1983	cctttacagagaaagcatgctccagtggcgcaatcggttagcgcgcggtacttatacagcagtatatgtgcgggtgatgccgaggttgtgagttcgagcCTCACCTGGAGCATGTTTTCTtccctttccgcc	mmu-mir-1983-p5	agaaagcatgctccagtggcgc	5'	Diff	gp3a	........(((((((((((((((((........(((((...(((.((.(((.(((((....))))).))))).)))..)))))....(((((.......))))))))))))))))))))))...........	113	53.8	-51.8	0.7	9	18	8.38799	19.3133	middle	0.0070965	0.00562032
394	465	mmu-miR-5106_L-7_1ss20CG	TAGCTCAGTTGGGAGA	16					cactcgagcaacaacaacagcaacaacccgagagcctatctagggcctAGGTCTGTAGCTCAGTTGGCAGAgt	1	mmu-mir-5106,	mmu-mir-5106	cactcgagcaacaacaacagcaacaacccgagagcctatctagggcctAGGTCTGTAGCTCAGTTGGCAGAgt	mmu-miR-5106	AGGTCTGTAGCTCAGTTGGCAGA	3'	Diff	gp3a	.((((..((..((((...(((.(((..((.((.((((.....)))))).))..))).)))..)))))).))))	72	53.4	-23.8	0.6	0	6	0	6.43776	low	0.0044478	0.00756808
414	485	mmu-mir-6243-p5	TGTGCTTGGCTGAGGA	16					tatgtgcttggctgaggagccaatggggcgaagctACCATCTGTGGGATTATGACTGAACGcctctaatcctgcccaggcagcgccgaaggagcctcggttggccccggatagccgggtcccgtccgtcccagctcagcgg	1	mmu-mir-6243,	mmu-mir-6243	tatgtgcttggctgaggagccaatggggcgaagctACCATCTGTGGGATTATGACTGAACGcctctaatcctgcccaggcagcgccgaaggagcctcggttggccccggatagccgggtcccgtccgtcccagctcagcgg	mmu-mir-6243-p5	tgtgcttggctgagga	5'	Yes	gp3a	....((((..((((.(((.(..(((((((...((((((....(..((((((.((.........))))))))..)...(((...(((((.(....))))))..)))..)).))))...)))))))..))))))))..)))).	32	63.1	-54	0.6	384	438	357.888	469.957	middle	5.33e-13	4.37e-13
427	502	mmu-mir-5105-p5_1ss2GC	CCCACTCCCCGGCGCCGCTCGT	22					cgcactccccGGCGCCGCTCGTGGGGGGCCcaagtccttctgatcgaggcccagcccgtggacggtgtgaggctggtcgcgg	1	mmu-mir-5105,	mmu-mir-5105	cgcactccccGGCGCCGCTCGTGGGGGGCCcaagtccttctgatcgaggcccagcccgtggacggtgtgaggctggtcgcgg	mmu-mir-5105-p5	cgcactccccGGCGCCGCTCGT	5'	Diff	gp3a	((((((..((.((((((..(..((((((((...(((.....)))...)))))..)))..)..))))))..))..))).))).	81	74.4	-37.9	0.6	132	426	123.024	457.081	middle	9.41e-63	1.09e-64
430	505	eca-mir-770-p5_1ss4TG	CCCGTCCGTGCCTCCA	16					gccgcccttccgtgcctccAGCACCACGTGTCTGGGCCATGtgagcaaggtcacatgggcccgatgtggtgctgggggcggcagggctctgctct	1	eca-mir-770,	eca-mir-770	gccgcccttccgtgcctccAGCACCACGTGTCTGGGCCATGtgagcaaggtcacatgggcccgatgtggtgctgggggcggcagggctctgctct	eca-mir-770-p5	cccttccgtgcctccA	5'	Diff	gp3a	((.(((((.((..((((((((((((((((...((((((((((((......)))))).)))))))))))))))))))))))).)))))...))...	92	68.4	-62.8	1	7	19	6.52399	20.3863	middle	0.0010236	0.00167515
433	508	hsa-miR-3195_L+4R-1	CCGGCGCGCCGGGCCCGGGT	20					ccgcagccgcCGCGCCGGGCCCGGGTTggccgctgacccccgcggggcccccggcggccggggcgggggcgggggctgccccgg	1	hsa-mir-3195,	hsa-mir-3195	ccgcagccgcCGCGCCGGGCCCGGGTTggccgctgacccccgcggggcccccggcggccggggcgggggcgggggctgccccgg	hsa-miR-3195	CGCGCCGGGCCCGGGTT	5'	Diff	gp3a	..((((((.((((.((..((((....(((((((((.((((...))))....))))))))))))).)).)))).)))))).....	77	92.9	-56.5	0.7	16	30	14.912	32.1888	middle	0.00090008	0.000860038
440	517	hsa-mir-4497-p5_1ss3CG	GGGTGGGCGCCGGCGGC	17					acCTCCGGGACGGCTGGGCgccggcggccgggagatccgcgcttcctgaatcccggccggcccgcccggcgcccgtccgcccgcgggtc	1	hsa-mir-4497,	hsa-mir-4497	acCTCCGGGACGGCTGGGCgccggcggccgggagatccgcgcttcctgaatcccggccggcccgcccggcgcccgtccgcccgcgggtc	hsa-mir-4497-p5	GGCTGGGCgccggcggc	5'	Diff	gp3a	(((..((((.(((..((((((((((((((((((..((..........)).)))))))))......)))))))))..)))))))..))).	88	83.1	-57.4	0.8	3	8	2.796	8.58368	low	0.034571	0.03191
447	525	mmu-mir-5115-p3_1ss12AG	GGGCCCTTCCCGTGGA	16					gggtgcggtggcgactCTGGACGCGAGCTGGGCCCttcccatggatggcctcagctgcggtgggtgtcacagcc	1	mmu-mir-5115,	mmu-mir-5115	gggtgcggtggcgactCTGGACGCGAGCTGGGCCCttcccatggatggcctcagctgcggtgggtgtcacagcc	mmu-mir-5115-p3	GGGCCCttcccatgga	3'	Diff	gp3a	....((.(((((.((((....(((.(((((((((..(((...))).)))).))))))))..))))))))).)).	69	70.3	-36.2	0.7	3	31	2.796	33.2618	middle	6.85e-09	2.86e-09
494	577	mmu-mir-6240-p3	GATGTGATTTCTGCCCA	17					ttgagaaaaacaaaaccaaaaaaccCCAAAGCATCGCGAAGGCCCACGGCGggtgttgactcgatgtgatttctgcccagtgctctgaaggtcaatgtgaagaaatgtgactctctt	1	mmu-mir-6240,	mmu-mir-6240	ttgagaaaaacaaaaccaaaaaaccCCAAAGCATCGCGAAGGCCCACGGCGggtgttgactcgatgtgatttctgcccagtgctctgaaggtcaatgtgaagaaatgtgactctctt	mmu-mir-6240-p3	gatgtgatttctgccca	3'	Yes	gp3a	..((((...(((....((....(((.((.(((((.((....))....(((((..(((.((.....)))))..)))))..))))).))..))).....))......)))...))))..	113	47	-25.2	0.5	37	80	34.484	85.8368	middle	2.39e-09	1.22e-09
501	584	mmu-miR-5097_L+3_1ss20AG	AGGGTTCATGTCCCTGTTCGGGCGCCA	27					ggggttcggacagatgggcatggagtcggtgggaattaacagacatctgagggtccaggGTTCATGTCCCTGTTCAGGCGCCA	1	mmu-mir-5097,	mmu-mir-5097	ggggttcggacagatgggcatggagtcggtgggaattaacagacatctgagggtccaggGTTCATGTCCCTGTTCAGGCGCCA	mmu-miR-5097	GTTCATGTCCCTGTTCAGGCGCCA	3'	Diff	gp3a	((.((..((((((..(((((((((..(..((((..((..(((....)))))..)))))..)))))))))))))))..)).)).	82	57.8	-33	0.7	315	318	293.58	341.201	middle	1.68e-06	1.27e-06
7	8	PC-3p-29001_79	CTTCTCTGTTACTTCCCTCAGT	22	gi|333778959|ref|NW_003541068.1|	-	11744	12005	gtgggtcacctggagggagcagcaggggacgcaaggggcaagtggctgtggcctgactctgCTTCTCTGTTACTTCCCTCAGGtctctagt	0						3'	New	gp4a	...((..(((((..(((((.(((((((((.(((.(((.((...(((....))))).))))))))))))))).)))))..)))))..))...	85	60.4	-40.2	0.7	42	54	39.144	57.9399	middle	0.0022976	0.00155064
19	22	PC-3p-109025_11	TTTCCCCTCGCCCATCCCCAGT	22	gi|333779752|ref|NW_003540275.1|	-	15077	15338	aaggtggggtgccttggggaagggggtggggagaagggcacacgcctcaggccggggtctgactctgtgcaccTTTCCCCTCGCCCATCCCCAGAgcacgcacggt	0						3'	New	gp4a	...(((..((((..((((((.(((((.(((((((.(((((((....((((((....))))))...))))).))))))))))).))).))))))..)))).)))...	100	67.9	-59.1	0.8	5	11	4.65999	11.8026	middle	0.025307	0.0263483
27	34	PC-5p-35611_59	CCAAGGAGTCTAACACGT	18	gi|333780243|ref|NW_003539784.1|	-	15896	16154	acaagCCAAGGAGTCTAACACATgagggaaagaaaatgacccttacttttgttggaaattcttttgttgtt	0						5'	New	gp4a	...(((.(((((((((((((..((((((...........))))))....)))))))..)))))).)))...	65	36.6	-17.2	0.7	80	119	74.5599	127.682	middle	7.09e-08	6.04e-08
45	52	PC-5p-60052_32	CAGCCCCCCGGCAGCAGCG	19	gi|333781294|ref|NW_003538733.1|	+	66233	66491	ccccagccccccCAGCCCCCCGGCAGCAGCGgtgtggagaggaggtggggccagagcgctgagctcccacctcagggttcaaagcgctggtggggggaacaggctgaga	0						5'	New	gp4a	...(((((.......((((((..((((.((....((((...(((((((((((((....))).)).))))))))....))))..))))))..))))))....)))))...	103	71.6	-56.7	0.7	42	51	39.144	54.721	middle	0.0063689	0.00392639
68	80	PC-3p-494792_2	GAAAGGGTTCCATGTGA	17	gi|347611502|ref|NW_003541307.2|	+	238392	238648	aaatattcacatggaaactccgaaggacagactgGAAAGGGTTCCATGTGAatagaacg	0						3'	New	gp4a	...(((((((((((((.(((...((......)).....)))))))))))))))).....	51	42.4	-20.4	0.8	0	4	0	4.29184	low	0.020204	0.038547
82	95	PC-3p-46584_40	TCATTCTCCTTCTTTGACCAGT	22	gi|347611743|ref|NW_003613507.1|	-	123700	123961	gtgggtcagagaggaaggatgtgatttgagcagatggttcTCATTCTCCTTCTTTGACCAGA	0						3'	New	gp4a	...(((((((((((.((((((.((..............)).)))))).)))))))))))...	56	46.8	-24.7	0.9	11	30	10.252	32.1888	middle	3.5403e-05	2.68e-05
143	170	PC-3p-12921_237	GTTCGACTCCCGGTATGGGAAC	22	gi|347612740|ref|NW_003538385.2|	+	24076	24337	gcAGTTCCCATATGGTCTAGCGGTTAGGATtcctggttttcacccaggcggcccggGTTCGACTCCCGGTATGGGAACacgattgctttt	0						3'	New	gp4a	(((((((((((((((((.(((..(..((...(((((.......)))))...))..)))).))))....)))))))))).....)))....	86	55.6	-30.2	0.6	85	437	79.2199	468.884	middle	3.9e-84	1.07e-89
456	541	PC-3p-12921_237	GTTCGACTCCCGGTATGGGAAC	22	gi|347618779|ref|NC_010457.4|	+	35901731	35901992	gcAGTTCCCATATGGTCTAGCGGTTAGGATtcctggttttcacccaggcggcccggGTTCGACTCCCGGTATGGGAACacgattgctttt	0						3'	New	gp4a	(((((((((((((((((.(((..(..((...(((((.......)))))...))..)))).))))....)))))))))).....)))....	86	55.6	-30.2	0.6	85	437	79.2199	468.884	middle	3.9e-84	1.07e-89
148	178	PC-3p-44479_43	AATGATGCCCCTTAGAGTTGA	21	gi|347612838|ref|NW_003613199.1|	+	126664	126924	tccttgtgcaggctgtgccctacaCAACTCAAGGGGGCATCATTCacttcatagtctctgtgAATGATGCCCCTTAGAGTTGAgcagtgcatgagctgtacaactg	0						3'	New	gp4a	...(((((((.(((((((.((...((((((.((((((((((((((((............)))))))))))))))).))))))...)).)))).))))))))))...	100	50	-54.1	1	9.5	43	8.85399	46.1373	middle	3.42e-09	2.11e-09
194	231	PC-3p-27648_95	ATGCGGAACCTGTGGATACGG	21	gi|347613463|ref|NW_003612983.1|	-	45711	45971	atagaattttacatatttacagtgggccctctgtatgcacctgggttccgcgtctatggttcagttgagtgtggtttgtgtactctgtttaggatctgcgattggttgaatctgtggATGCGGAACCTGTGGATATGGagggctgaccaaaatacttaaacatccgc	0						3'	New	gp4a	...((..((((..(((((...((..((((((..(((.(((..((((((((((((((((((((((..((..(..(.(..((.........))..).)..)..))..))))))).)))))))))))))))))).)))..))))))..))..)))))..))))..))...	161	45.5	-63	0.8	86.5	103.5	80.6179	111.051	middle	0.00014554	0.000116872
206	245	PC-3p-142108_7	AATGGTGCTCCAGGGTTGTACA	22	gi|347618775|ref|NC_010461.4|	+	53138199	53138461	tgagtagggccactccatcgCACAACTCTGGGAAGTACCATTTagatatgctatattgtgAATGGTGCTCCAGGGTTGTACAgtgtggtagccttgcctt	0						3'	New	gp4a	...(((((((.((..(((...((((((((((..((((((((((((((((...))))).)))))))))))))))))))))...)))..)).)))))))...	94	48	-44.8	0.9	2	10	1.864	10.7296	middle	0.0034881	0.00356705
239	287	PC-3p-56853_30	CGGAGCTGAGAACAACTGC	19	gi|347618775|ref|NC_010461.4|	-	102468646	102468904	catcagtggtttttaaatctccacatgattttaatgtgcagtCAGAGCTGAGAACAACTGCct	0						3'	New	gp4a	...((((.(((((((..(((.(((((.......))))).....)))..))))))).))))...	57	39.7	-14.5	0.6	11	34	10.252	36.4807	middle	3.4e-06	2.78e-06
257	309	PC-3p-196040_7	TGATTGGCACCTCTTTGAGTGAC	23	gi|347618775|ref|NC_010461.4|	-	137160634	137160896	ccgggtcagcaccttgagctatgctgtgtgcggtgctccacttcaagaagtgccatccatgtggctagaaataTGATTGGCACCTCTTTGAGTGACgtaacacacaacaggtacaacatcagtgctgaccgta	0						3'	New	gp4a	...(((((((((.(((..((.((.((((((...(((..((((..((((.((((((..(((((........)))))..)))))).))))..))))..))).)))))).))))..))).....)))))))))...	127	50.4	-53.6	0.8	4	11	3.728	11.8026	middle	0.011945	0.0129467
299	360	PC-5p-238247_4	CACCTGCCCTCTGCACGTGGG	21	gi|347618776|ref|NC_010460.3|	-	18582866	18583126	cttggtaatgtctgcggCACCTGCCCTCTGCACGTGGGctgtgaggatgggtagcccagggcaggggtcaggaaccctgggcttacttct	0						5'	New	gp4a	...(((((.((((..((..((((.(((((((...(((((((..........)))))))..))))))).))))..))..)))))))))...	84	62.2	-40.1	0.7	4	10	3.728	10.7296	middle	0.022078	0.0223984
311	373	PC-3p-191056_7	GTTCTCACCTCGCTGGTGTCC	21	gi|347618776|ref|NC_010460.3|	-	41460971	41461231	tgaggggcagggagaggccagcgagtagagaagccctcagaccgtgaagctggGTTCTCACCTCGCTGGTGTCCccccgccctgccccaac	0						3'	New	gp4a	...(((((((((...((((((((((..(((((.(((...............))))))))..)))))))).....))...)))))))))...	85	67	-49.2	0.8	1.5	5.5	1.398	5.90128	low	0.046899	0.0328563
312	374	PC-3p-191056_7	GTTCTCACCTCGCTGGTGTCC	21	gi|347618776|ref|NC_010460.3|	-	41548245	41548505	tgaggggcagggagaggccagcgagtagagaagccctcagaccgtgaagctggGTTCTCACCTCGCTGGTGTCCccccgccctgccccaac	0						3'	New	gp4a	...(((((((((...((((((((((..(((((.(((...............))))))))..)))))))).....))...)))))))))...	85	67	-49.2	0.8	1.5	5.5	1.398	5.90128	low	0.046899	0.0328563
335	402	PC-5p-502875_2	CCCAGGCCCTTCCTCATTGGAAT	23	gi|347618777|ref|NC_010459.4|	+	36265289	36265551	ggaccagcccaccccctCCCAGGCCCTTCCTCATTGGAACtctcaggccccaatggttccagtgagggcagggcctgagctggagcaggctggcag	0						5'	New	gp4a	...((((((......((((((((((((((((((((((((((.............)))))))))))))).))))))))....))))..))))))...	90	66.7	-51.9	0.8	0	4	0	4.29184	low	0.020204	0.038547
337	405	PC-3p-47091_39	AATGATGCCCCTTAGAGTTGAG	22	gi|347618777|ref|NC_010459.4|	+	39852322	39852583	tccttgtgcaggctgtgccctacaCAACTCAAGGGGGCATCATTCacttcatagtctctgtgAATGATGCCCCTTAGAGTTGAGcagtgcatgagctgtacaactg	0						3'	New	gp4a	...(((((((.(((((((.((...((((((.((((((((((((((((............)))))))))))))))).))))))...)).)))).))))))))))...	100	50	-54.1	1	7.5	25.5	6.98999	27.3605	middle	3.0492e-05	3.15e-05
338	406	PC-3p-44479_43	AATGATGCCCCTTAGAGTTGA	21	gi|347618777|ref|NC_010459.4|	+	40148104	40148364	tccttgtgcaggctgtgccctacacaactcaagggggcatcattcacttcatagtctctgtgAATGATGCCCCTTAGAGTTGAgcagtgcatgagctgtacaactg	0						3'	New	gp4a	...(((((((.(((((((.((...((((((.((((((((((((((((............)))))))))))))))).))))))...)).)))).))))))))))...	100	50	-54.1	1	9.5	43	8.85399	46.1373	middle	3.42e-09	2.11e-09
339	407	PC-5p-526776_2	TTTTTGTTTTGGGTACATCGT	21	gi|347618777|ref|NC_010459.4|	+	41320365	41320625	tttgtttttgTTTTTGTTTTGGGTACATCGTtcgtatgcggaagttcccgacccagggattgaaccca	0						5'	New	gp4a	...((((..(((..((..(((((.((.((((......))))..)).)))))..))..))).))))...	62	44.1	-17.2	0.6	0	4	0	4.29184	low	0.020204	0.038547
345	416	PC-3p-394119_2	TTGAACATAAGGGAATGTAGTA	22	gi|347618777|ref|NC_010459.4|	+	44761647	44761908	tatgtactctgttgctttaTGTGTCATTTTTAATTGAACATAAGGGAATGTAGTAttttaatcataactctacc	0						3'	New	gp4a	...(((((..(((.((((((((.(((........))))))))))).)))..)))))..................	53	28.4	-15.8	0.8	0	4	0	4.29184	low	0.020204	0.038547
352	425	PC-5p-144500_7	TATGGTCACTGCTGTGACACGGG	23	gi|347618777|ref|NC_010459.4|	+	66123539	66123801	aaagcctgtcacttggggttccctggtggctccatgggttaaggacccggTATGGTCACTGCTGTGACACGGGttggatcttcctatgccacagcagtgacaatgccaggtccttcaccaggaacttccacatgccaaaggtgtggccaa	0						5'	New	gp4a	...(((...(((((..(((....(((..(.(((.(((...(((((((.(((((.((((((((((((.((..((.........))..)).)))))))))))).))))).)))))))..)))))).)..)))...)))..))))).)))...	144	55.3	-73.8	0.9	1	16	0.931999	17.1674	middle	1.5013e-05	1.02e-05
355	428	PC-5p-2205_1828	TGTTGGTTTTCGGAACTGAGGCCA	24	gi|347618777|ref|NC_010459.4|	+	69466399	69466657	aagcaggcccaagcctcctggataccacagctaagaataatggaataggaccatggttctacttTGTTGGTTTTCAGAACTGAGGCCAtgattaaggacagccagggacattcatattgcaccactagaggtgaaattcttggaccagtacaagatggaCCAGAGCAAAAGCATTTGCCAAGAatgttttcatcaatcaaga	0						5'	New	gp4a	.....((((..((....(((((.(((((((...((((..((((.......))))..))))...))).)))).)))))..))..)))).(((((..((....)).(..((((((......((((......))))......((((.(((........))).)))).(((((....)))))...))))).)..)...)))))...	82	43.6	-51.1	0.6	11700	14990	10904.4	16083.7	high	0	0
355	429	PC-3p-3322_1173	CCAGAGCGAAAGCATTTGCCAAGA	24	gi|347618777|ref|NC_010459.4|	+	69466399	69466657	aagcaggcccaagcctcctggataccacagctaagaataatggaataggaccatggttctacttTGTTGGTTTTCAGAACTGAGGCCAtgattaaggacagccagggacattcatattgcaccactagaggtgaaattcttggaccagtacaagatggaCCAGAGCAAAAGCATTTGCCAAGAatgttttcatcaatcaaga	0						3'	New	gp4a	.....((((..((....(((((.(((((((...((((..((((.......))))..))))...))).)))).)))))..))..)))).(((((..((....)).(..((((((......((((......))))......((((.(((........))).)))).(((((....)))))...))))).)..)...)))))...	82	43.6	-51.1	0.6	882	2292	822.023	2459.23	middle	0	1.47e-278
356	430	PC-3p-6341_568	ATCCCGGGGCCGAGGGA	17	gi|347618777|ref|NC_010459.4|	-	5625069	5625327	tctctctctctctcagagctcagaatcctggcgaggATCCCGGGGCCGAGGGAgcagagcac	0						3'	New	gp4a	...(((((((((((...((((...(((((....)))))....)))).))))))).))))...	56	62.9	-24.3	0.6	12.5	297	11.65	318.669	middle	3.34e-81	4.61e-95
357	431	PC-3p-6341_568	ATCCCGGGGCCGAGGGA	17	gi|347618777|ref|NC_010459.4|	-	5670480	5670738	tctctctctctctcagagctcagaatcctggcgaggATCCCGGGGCCGAGGGAgcagagcac	0						3'	New	gp4a	...(((((((((((...((((...(((((....)))))....)))).))))))).))))...	56	62.9	-24.3	0.6	12.5	297	11.65	318.669	middle	3.34e-81	4.61e-95
384	461	PC-5p-44436_45	CTGACGTGCAAATCGGTC	18	gi|347618778|ref|NC_010458.3|	+	4181327	4181584	tactggagagataacgggtttgtttaCAGACGTGCAAATCGGTCtgcatgactgaggctgccaccgctgtattactgacagtcactcttcacgg	0						5'	New	gp4a	...(((((((...((..((..((.(((((..(((((..((((((.....))))))...)).)))..)))))..))..)).))..)))))))...	88	50	-29.3	0.6	45	51	41.94	54.721	middle	0.014903	0.00948181
390	467	PC-3p-220985_4	TGTGACTGTGGTGTACACTAG	21	gi|347618778|ref|NC_010458.3|	+	29749584	29749844	gtgagctgtggtgtacgtcgcagacacggcttggatcccgcattgcTGTGACTGTGGTGTACACTAGcagctata	0						3'	New	gp4a	...(((((((((((((..(((((.((((((.((.......))..)))))).)))))..)))))))).)))))...	69	54.7	-38.3	0.9	0	8	0	8.58368	low	0.0010214	0.000658383
423	503	PC-5p-257057_3	AGATGCTTGAGAATGCT	17	gi|347618778|ref|NC_010458.3|	-	22366703	22366959	acagagttgggctAGATGCTTCAGAATGCTcgttgacggtaaagcagccttaggtttttcaggcgtcatgacccagctggt	0						5'	New	gp4a	....(((((((..((((((((.((((.(((...(((.(((......))))))))))))).))))))).)..)))))))...	74	50.6	-23.7	0.6	0	4	0	4.29184	low	0.020204	0.038547
474	560	PC-3p-61085_27	GCCCCCGGCGTCCCGTCC	18	gi|347618779|ref|NC_010457.4|	+	74617024	74617281	gccgggggcggcggggactagccgcgcgccccttccgggcccgagcagcgcgcGCCCCCGGCGTCCCCTCCtcc	0						3'	New	gp4a	...(((((((.(((((....(((((((((((.....)))).......))))).))))))).)))))))......	65	86.5	-43.7	0.7	8	20	7.45599	21.4592	middle	0.0012073	0.000975915
475	561	PC-5p-611_6271	CAGCCTCTGGCATGTTGGAA	20	gi|347618779|ref|NC_010457.4|	+	78245466	78245725	ctgCAGCCTCTGCCATGTTGGAAtttcaaacccaaaacagctgcttggaaggagccagcatgccagaggctgggc	0						5'	New	gp4a	...(((((((((.((((((((..((((((...............))))))....)))))))).)))))))))...	69	56	-33.2	0.8	256	6020	238.592	6459.22	middle	0	0
509	602	PC-3p-518355_2	TAGTAACTACCTATCCTGAGCAC	23	gi|347618779|ref|NC_010457.4|	+	147222643	147222905	ATAAATTGGAATAGTGTCTTAAACATTcttggttgttcaggtggtggtggtttgataaatgacgtagacttcctgTAGTAACTACCTATCCTGAGCACtcgta	0						3'	New	gp4a	.......(((((.((.......))))))).(..((((((((....(((((((...((...((........))...))..)))))))...))))))))..)...	22	38.8	-24.4	0.6	0	5	0	5.3648	low	0.009413	0.01708
577	676	PC-5p-7929_443	TCGGGGATTGCAATTATTC	19	gi|347618780|ref|NC_010456.4|	+	35031369	35031627	tgatgtgggggatcTCGGGGATTGCAATTAATCtgaagcagcgtgccattaattgcttatttttcaggaagactgtaattgcctctttctgttcctcacagaa	0						5'	New	gp4a	...((((((((((...((((((((((.((..(((((((.((((..........))))....)))))))..)).))))))..)))).....))))))))))...	97	42.7	-28.2	0.6	129	783	120.228	840.128	middle	0	1.85e-172
596	702	PC-5p-251970_3	AAGGAAAGAATTCTAGTGGGGAA	23	gi|347618780|ref|NC_010456.4|	+	82926810	82927072	agatgtcttttaaaggaAAGGAAAGAATTCTAGTGGGGAGtagctcctagggctttacttacaacctgctaattctttcttagctgacagat	0						5'	New	gp4a	...((((.......((..((((((((((..(((..((((((((((.....))))..))))....))..)))))))))))))..))))))...	86	39.1	-25.4	0.7	0	5	0	5.3648	low	0.009413	0.01708
617	728	PC-5p-5391_883	ACAGGCACGGCTGGTTTGAGC	21	gi|347618780|ref|NC_010456.4|	+	133619219	133619479	gctgcgtccACAGGCACGGCTGGTTTGAGCattttaactgaattgCCAAACCAGTTGTGCCTGTAGacacaac	0						5'	New	gp4a	..((.(((.((((((((..((((((((.(((.(((....))).)))))))))))..)))))))).))).))..	69	50.7	-41.4	1.1	643	557	599.275	597.639	middle	9.0158e-05	4.94e-05
620	732	PC-3p-300451_3	CTGGAACTTGGCTGTGTCTCTA	22	gi|347618780|ref|NC_010456.4|	+	134752347	134752608	gcaggtgaaatgctttaacacttggggtgggaagggaccggacaagtcccgggtgagtttggtcctCTGGAACTTGGCTGTGTCTCTAacccgctcctggagcaggcaccctc	0						3'	New	gp4a	...((((...((((..(......((((((((.(((((((((.(((((.((((..((......))..)))).))))).))).))))))..)))))))))..))))..))))...	107	58.4	-49.7	0.8	1	8	0.931999	8.58368	low	0.0043709	0.00395829
634	746	PC-3p-360104_2	TCAGAAGGCCACCCTCTTCAT	21	gi|347618780|ref|NC_010456.4|	-	20090201	20090461	cactggttgtcagtgggggaaggtggccttcaaTCAGAAGGCCACCCTCTTCACctctgttgctggcatccaaaa	0						3'	New	gp4a	...(((.((((((((((((((((((((((((.....))))))))))...))).))))....))))))).)))...	69	54.7	-38.5	0.9	0	4	0	4.29184	low	0.020204	0.038547
647	761	PC-3p-119263_9	CAGCTGCCCTTCTCTCTCCAGT	22	gi|347618780|ref|NC_010456.4|	-	53019682	53019943	aagtggggagggggcggccgggacaggtggcctctcCAGCTGCCCTTCTCTCTCCAGTc	0						3'	New	gp4a	...(((((((((((((((..(((.(((...))).))).))))))))...)))))))...	53	69.5	-31.2	0.8	1	8	0.931999	8.58368	low	0.0043709	0.00395829
664	778	PC-5p-87507_16	TGCGCCGCGACCGGCTCCGG	20	gi|347618780|ref|NC_010456.4|	-	97984967	97985226	aaggcggacggaagacgcaTGCGCCGCGGCCGGCTCCGGtctggttctaccgtgctggcggcggccgctgcatctacgtgtcggtacg	0						5'	New	gp4a	...((.((((..(((.(((.(((((((.((((((..((((........)))).)))))).))))).))))).)))...)))).))...	82	70.5	-44.1	0.7	19	36	17.708	38.6266	middle	0.00024727	0.000205388
676	791	PC-5p-63018_27	TTGGTTGATATAGACA	16	gi|347618780|ref|NC_010456.4|	-	131464486	131464747	tgaaagatcTTGGTTGATATAGACAtgcaaatatacctacttcacccacctcagacccttaat	0						5'	New	gp4a	...(((.((((((.(((..(((..(((....)))..)))..))).)))....)))..)))...	57	38.1	-6.5	0.3	13	27	12.116	28.9699	middle	0.00072261	0.000565733
680	795	PC-3p-108843_19	TGGCACCAGCACTGGCGGTGGC	22	gi|347618780|ref|NC_010456.4|	-	138325723	138325984	ggcggtgagcccggcgctggcagtgttggtggcactcgtgtggtggcagTGGCACCAGCACTGGCGGTGGCggtcgcaccagc	0						3'	New	gp4a	.((((((...(((.(((((.(((((((((((.((((.((......)))))).))))))))))).))))).)))...)))).))	82	72.3	-51.5	0.9	17	24	15.844	25.7511	middle	0.022315	0.016409
719	839	PC-3p-188240_5	ACAGGACCTGGGAATGTGTATT	22	gi|347618781|ref|NC_010455.4|	+	68053742	68054003	tagacacattgcccgggccctctatttataggtctaggACAGGACCTGGGAATGTGTATT	0						3'	New	gp4a	...(((((((.((((((.((((((..........)))...))).)))))))))))))...	54	48.3	-21.7	0.7	3	8	2.796	8.58368	low	0.034571	0.03191
737	860	PC-3p-227710_4	TGCTTGTGAATTCCAAAAAA	20	gi|347618781|ref|NC_010455.4|	+	137707748	137708007	tacttttgatattagaacagagtttccttgaatagcctcTGCTTTTGAATTCCAAAAAAc	0						3'	New	gp4a	...(((((...(((((((((((..............))))).))))))....)))))...	54	31.7	-8.2	0.4	0	4	0	4.29184	low	0.020204	0.038547
762	885	PC-5p-66777_23	GAGAGGGTGTAAATCTC	17	gi|347618781|ref|NC_010455.4|	-	2675054	2675316	GAGAGGGTGTAAAGCTCtccaggtgattctcatgtctagctgtggttaactatcacagccagcatcagaatcaactggaaggtttgtt	0						5'	New	gp4a	...........((((..(((((.(((((((.(((.((.((((((((.....)))))))).))))).))))))).)))))..))))...	74	45.5	-37.3	0.9	5	20	4.65999	21.4592	middle	9.8599e-05	0.00016058
770	893	PC-5p-30309_73	TTCAAGTAACCCAGGATAGGCTT	23	gi|347618781|ref|NC_010455.4|	-	24885175	24885436	ctggcgaaggccgtggcctcgTTCAAGTAACCCAGGATAGGCTGtgcaggtcccaaggggcctattcttggttacttgcacgcgg	0						5'	New	gp4a	..(((....)))....((.(((.(((((((((.(((((((((.........((....))))))))))).))))))))).))).))	69	60	-39.7	0.8	135	137	125.82	146.996	middle	0.0014599	0.000969545
794	920	PC-3p-269392_3	TTTGTTGCTGTGGCTGTGGATCT	23	gi|347618781|ref|NC_010455.4|	-	76977305	76977567	taaggacacgggtttgatccctggcctctctcagtggcttaaggatctggcattgctgggagttgtggctcagatccTTTGTTGCTGTGGCTGTGGATCTtctgtatgccgga	0						3'	New	gp4a	...((..(((((...(((((..((((.....(((..((..(((((((((((...((.....))....)).))))))))).))..))).))))..))))).)))))...))...	107	53.1	-44.3	0.7	0	6	0	6.43776	low	0.0044478	0.00756808
797	925	PC-3p-115767_10	GTGGTTGTGGCATAGACCTCAGT	23	gi|347618781|ref|NC_010455.4|	-	80688584	80688845	attgctgcaagctAGGGTCTAGGTCGCAGATACAGcttggttctggtgttgctGTGGTTGTGGCATAGACCTCAGCtgcagctct	0						3'	New	gp4a	...(((((.((((..((((((.((((((..((((((..............))))))..)))))).))))))..)))))))))...	79	52.9	-43	1	0	20	0	21.4592	middle	2.07e-07	3.77e-08
833	967	PC-3p-41368_47	ACTACCGATTGGATGG	16	gi|347618781|ref|NC_010455.4|	-	155033573	155033832	atttattttttctgtgcctcaagtttccgatatgtaaaaggggtgtatttattgccccaagACTACCGATTGGATGCttagactaaaggagtattg	0						3'	New	gp4a	...((((..((..((..((.(((..((((((..(((...(((((.........))))).....)))..))))))..)))))))..))..))))...	90	37.5	-20.8	0.6	38	44	35.416	47.2103	middle	0.018911	0.0121552
854	991	PC-5p-246116_3	AGCGCAGAGCGGTTTGGTCGTT	22	gi|347618782|ref|NC_010454.3|	+	5578611	5578872	ctggAGCGCAGAGCGGTTTGGTCGTTcgttggagttgcttcttgctttggttcggc	0						5'	New	gp4a	...((((.(((((((....(((..(((....)))..)))...)))))))))))...	50	57.1	-16.8	0.5	2	9	1.864	9.65665	low	0.0069403	0.00689259
875	1016	PC-3p-345662_2	ACTTGCAGGGCTTAAGAGCT	20	gi|347618782|ref|NC_010454.3|	+	25754741	25755000	gCTGGCAGCTTCTTCAGTCCTGGAaggcacagagtgaggctctgACTTGCAGGGCTTAAGAGCTgcttat	0						3'	New	gp4a	...((((((.((((.(((((((.(((...(((((.....))))).))).))))))).))))))))))...	64	54.3	-35.3	0.9	0	4	0	4.29184	low	0.020204	0.038547
912	1060	PC-3p-388032_2	CCTTGCCTTTACAGACCCGTCC	22	gi|347618782|ref|NC_010454.3|	-	20165292	20165552	cagggggaacagggACGGGATTGTAAAGGCAGAGCgggcgattcccccacgCCTTGCCTTTACAGACCCGTCCctgttccccact	0						3'	New	gp4a	...((((((((((((((((..((((((((((..(((((........)).)))..))))))))))..))))))))))))))))...	79	62.4	-61.3	1.2	0	5	0	5.3648	low	0.009413	0.01708
919	1068	PC-5p-452099_2	TTGGATTCGTCTTTGACC	18	gi|347618782|ref|NC_010454.3|	-	40198772	40199029	gaaggaaaaggtgaagaacaaacctcagtccaggaggaacgtccagtgttgctggcatttgcttatctgctaagaaTTGGATTCGTCTTTGACCgggttattcctctacacatttctacaataaataaaatcccacacacctccaggtggtaccaagtcctgtgcttgCCCCGGATCGTCAGAGGCTGG	0						5'	New	gp4a	...(((..((((.........))))...))).........(((((((.....(((((..........)))))...)))))))..(((((((((.(((....))).........................((((.((.((((....))))))..(((((.....)))))....)))).)))))))))...	102	47.6	-45.3	0.5	0	5	0	5.3648	low	0.009413	0.01708
926	1079	PC-5p-9623_347	TCCCTGGTCTAGTGGTTAGGATTCGG	26	gi|347618782|ref|NC_010454.3|	-	44808832	44809097	tcttgggagtTCCCTGGTCTAGTGGTTAGGATTTGGtgtgctcactgctgcagcctaggtttaagccctggtctgggaactgagatcccacat	0						5'	New	gp4a	...(((((((((((.((.((((.((((..((..(((..(((........)))..)))..))..)))))))).)))))))).....)))))...	87	52.7	-36	0.7	258	496	240.456	532.188	middle	5.2e-43	2.57e-43
936	1090	PC-3p-47117_40	GCGCGCGCGTGCGCGCGGGA	20	gi|347618782|ref|NC_010454.3|	-	55378540	55378799	ctttgctttgctttgtgtgtgtgtgtgtGCGCGCGCGTGCGCGCGCGAgctgtatgcacat	0						3'	New	gp4a	...(((...((.(((((((((..(((((....)))))..))))))))))).....)))...	55	59	-26.8	0.7	0	157	0	168.455	middle	5.78e-48	4.08e-60
950	1106	PC-5p-17107_164	GGTTCGACTCCCGGTGTGGGAAC	23	gi|347618783|ref|NC_010453.4|	+	22627710	22627969	gtctcccacatggtctagcggttaggattcctggttttcacccaggcggcccgGGTTCGACTCCCGGTGTGGGAACgccagtactccctttttgaaaagtaaccaacagcaacccaactcaagttcctctta	0						5'	New	gp4a	..........(((....((.(((.((...(((((.......)))))..(((((((.......))))).))((((((....))..))))..............))))).))...)))................	22	53.8	-28.2	0.4	123.5	300.5	115.102	322.425	middle	3.67e-35	1.25e-35
950	1107	PC-3p-12879_235	TCGACTCCCGGTGTGGGAAC	20	gi|347618783|ref|NC_010453.4|	+	22627710	22627969	gtctcccacatggtctagcggttaggattcctggttttcacccaggcggcccgGGTTCGACTCCCGGTGTGGGAACgccagtactccctttttgaaaagtaaccaacagcaacccaactcaagttcctctta	0						3'	New	gp4a	..........(((....((.(((.((...(((((.......)))))..(((((((.......))))).))((((((....))..))))..............))))).))...)))................	22	53.8	-28.2	0.4	9.5	329	8.85399	353.004	middle	0	2.28e-110
965	1123	PC-3p-30639_76	CGCGCGGTCGCCCGGGGA	18	gi|347618783|ref|NC_010453.4|	-	1311190	1311448	ctcgctctggggaccctgcccggagcagttcCGCGCGGGCGCCCGGGGAcccagggcacc	0						3'	New	gp4a	...((((((((..(((((((((..((......)).))))))...)))..))))))))...	54	80	-37.5	0.8	49	94	45.6679	100.858	middle	2.29e-09	2.06e-09
1005	1169	PC-5p-119682_9	CGCTCTCGCAGGAAACA	17	gi|347618784|ref|NC_010452.3|	+	25233191	25233453	taactggCGCTCTCGGAGGAAACActcacagtgaatgaaagaaggctgaacacgtcctatgatgtctatactcttcttcccattttcggctgttca	0						5'	New	gp4a	.(((.(((.......(((......))).....(((((.((((((..((...(((((....)))))...))..))))))..)))))...))))))..	12	45.8	-17.9	0.4	5	10	4.65999	10.7296	middle	0.044781	0.0431921
1023	1189	PC-3p-17390_163	GCCCCCGCGGTCCTCCTCCG	20	gi|347618784|ref|NC_010452.3|	+	59370806	59371065	TTGGGCATCAGGAACATAGATCggcctaggagccgggcagcccccggctgggcaggggagagaggaggaaggggtgcagggcgtgcgcggggttgagccctccctcgcggcCCCCCCGCGGTCCTCCTCCGccgccgccgcccacctggccgcccccg	0						3'	New	gp4a	..((((.((.........))..((((.(((.((((((.....)))))).((((.((((...((((((((.((((....((((.((((.((((........)))).))))))))))))....)))))))).....)).)))))).)))))))))))...	153	76.6	-83	0.7	318	725	296.376	777.896	middle	9.37e-77	8.44e-78
1042	1212	PC-3p-202589_4	GTACGACTCTTAGCAGTGGA	20	gi|347618784|ref|NC_010452.3|	-	21029686	21029945	gggtcactgctgagttaggtcaaatttactttttggaggacccatactctgagccagGTACGACTCTCAGCAGTGGAga	0						3'	New	gp4a	...(((((((((((...((((.....(((((((..(((........)))..))..))))).)))))))))))))))...	73	49.4	-28.5	0.7	0	8	0	8.58368	low	0.0010214	0.000658383
1065	1239	PC-3p-450395_4	CGCAACCGATCCAGGA	16	gi|347618785|ref|NC_010451.3|	+	1666518	1666776	tctgatctcccagttggtcgacgtgcacacagtagtttagaaCGCAACCGATCTAGGAgattttg	0						3'	New	gp4a	...(((((((.(((((((...(((....((....)).....)))..))))).)).)))))))...	59	47.7	-16.7	0.5	2	10	1.864	10.7296	middle	0.0034881	0.00356705
1082	1257	PC-3p-59265_29	GAGTTCTCTTTTCTTTGTG	19	gi|347618785|ref|NC_010451.3|	+	39282878	39283136	aaagatcagctcaacaagtcaaacaggagGAGTTCTCTTTTATTTGTGggaagttcaga	0						3'	New	gp4a	...((....(((.((((((.(((.((((....)))).))).)))))))))....))...	53	39	-9.9	0.4	0	29	0	31.1159	middle	4.01e-10	1.1e-11
1098	1277	PC-3p-37650_56	TAAGCTTGCGTTGATTAAG	19	gi|347618785|ref|NC_010451.3|	+	76932827	76933085	TGATTATTTTGTGGTACATACTGGAttggttaatgaacttcagtgttaaactacctgattgattgcttataaattagcaTAAGCTTGAGTTGATTAAGgaattttactttgaaaattaatttggtaatagtaacttaatatatattcatgcttacag	0						3'	New	gp4a	.(((((.((.(((((..(((((((...((((....)))))))))))...)))))..)).)))))(((........))).(((((.(((((..((((((..((((((((..............))))).)))..))))))....))))).)))))...	63	26.8	-31.1	0.7	16	75	14.912	80.472	middle	3.39e-15	1.04e-15
1152	1335	PC-3p-145396_8	ATTGATAAAGGAGGACTACAC	21	gi|347618785|ref|NC_010451.3|	-	110083785	110084045	taagtagtatccctttatctgcaattttgctttctacagtttcagttacattcagttgaccactttttggataagtgaatctacggaaagcaaagcaaagccATTGATAAAGGAGGACTACACt	0						3'	New	gp4a	...(((((.((((((((((.((..(((((((((((..((.((((.(((..(((((...........)))))))).)))).))..)))))))))))....))....)))))))).)))))))...	118	36.3	-35.2	0.8	6	12	5.59199	12.8755	middle	0.027932	0.0298299
1156	1340	PC-3p-65812_26	GTTAGTGATGATTTATAAAATTA	23	gi|347618785|ref|NC_010451.3|	-	127781108	127781370	atgtatttttatcaattgtactagttagtaagcaaaatgctGTTAGTGATGATTTATAAAATTAaac	0						3'	New	gp4a	...((.((((((.(((..((((...(((((.......)))))..))).)..))).)))))).))...	61	22.4	-8.1	0.5	24	49	22.368	52.5751	middle	6.67e-06	3.54e-06
1172	1358	PC-5p-239690_4	TTGCGGGGCACGTAGCGTGTGT	22	gi|347618786|ref|NC_010450.3|	+	4005283	4005544	ctgTTGCGGGGCACGTAGCGTGTGTgtgttaggtacacacgagcgtgtcctgcaatct	0						5'	New	gp4a	..((((((((((((((..((((((((.......)))))))).))))))))))))))..	54	56.9	-34.1	1	1	8	0.931999	8.58368	low	0.0043709	0.00395829
1211	1402	PC-3p-514121_2	ATTTGAATTTCTTTTGGAATGTAAA	25	gi|347618786|ref|NC_010450.3|	+	118510064	118510328	TTATTTGCATACGGTAGAATTGTGAGGTTtttaatagaagtcatgagattttgtatatcttcactaaatattaaaaagtgtattcttttctaatactactagaaATTTGAATTTCTTTTGGAATGTAAAaaatatatagtatgcgtagtaacagctctggtcctaccagtatctaatattgaaaatattttaaaagtaagttttaattgta	0						3'	New	gp4a	............(((((....((((((.........((((((....))))))......))))))....((((((((((......))))).))))))))))...((((..((((((((((..(((((....(((((.(((.((((((((...((....))...))))..))))))))))))....)))))..))))).)))))..))))...	43	24.6	-37.5	0.7	0	5	0	5.3648	low	0.009413	0.01708
1231	1426	PC-3p-221259_4	AGAGTTCTACAGACGATC	18	gi|347618786|ref|NC_010450.3|	-	17673829	17674087	gaaggcttttatttagaaagtcagagactgactatatcAGAGTTCTACAGACTATCtgaatatgcccca	0						3'	New	gp4a	...(((...((((((((.((((((((.((((.....))))..))))...)))).)))))))).)))...	63	37.7	-19.5	0.8	4	9	3.728	9.65665	low	0.040345	0.0380411
1250	1448	PC-3p-209558_4	ATTTGATCTGTTTCTGTTATC	21	gi|347618786|ref|NC_010450.3|	-	74563532	74563792	tgaaaactgaaaacatatgcatacctctcatattagtcatattatcaatgatctatATTTGATGTGTTTCTGTTATCagtttatc	0						3'	New	gp4a	...(((((((.((((...(((((..((..((((..(((((.......)))))..))))..)))))))...)))).)))))))...	79	27.1	-19.9	0.9	0	4	0	4.29184	low	0.020204	0.038547
1264	1462	PC-5p-108356_11	GGAGAGGGTGTAAATCTCG	19	gi|347618786|ref|NC_010450.3|	-	117383933	117384191	cattctgGGAGAGGGTGTAAATCTTGcacagggactgtagcatgttcacaccaggtctccaagataa	0						5'	New	gp4a	...(((.(((((.(((((.(((..(((((((...)))).))).))).)))))...))))).)))...	61	47.8	-22.6	0.7	13	33	12.116	35.4077	middle	2.7837e-05	2.65e-05
1267	1465	PC-5p-166148_7	CAGAGGTTTCCAGCTTATAGGA	22	gi|347618786|ref|NC_010450.3|	-	122371794	122372055	tcttacacagctttcCAGAGGTTTCCAGCTTATAGGAtattcatatggtagtTCTGTGAACTAGAAACCTCTGGaaagtggtgtacat	0						5'	New	gp4a	...(((((..(((((((((((((((.((.(((((((((..((....))..))))))))).)).)))))))))))))))..)))))...	82	39.8	-42.7	1.2	0	11	0	11.8026	middle	0.0001174	5.73e-05
1276	1475	PC-5p-446472_2	AATGTAAAATCTGAATCACGGCTC	24	gi|347618786|ref|NC_010450.3|	-	148227983	148228246	ttggatgttaaattttatgatcctcctagataagaaggcttccAATGTAAAATCTGAATCACGGCTCTGTAACATGGTGGCTAAATGGtgctgtacaagttaggctttcaaagattcagtttttgcatcta	0						5'	New	gp4a	(((((.((....((((((...........))))))..)).))))).((((((.(((((((..((((...((((.(((..((........))..).)).))))))))......))))))).)))))).....	80	36.6	-27.4	0.6	1	7	0.931999	7.51072	low	0.0090072	0.00810578
1284	1487	PC-5p-174359_5	TACGTGCTAGTTCTGTACTGGG	22	gi|347618787|ref|NC_010449.4|	+	22266341	22266602	ctactcgagcagatgttaggaaatgagaTACGTGCTAGTTCTGTACTGGGtatgcaggataCCCAGTACAGAACTAGCACGTagctaagttcagtgaacattagctgcgagcct	0						5'	New	gp4a	...(((((((..(((((..(((...((.(((((((((((((((((((((((((.....))))))))))))))))))))))))).))...)))....)))))..))).))))...	108	46.5	-64.8	1.2	0	8	0	8.58368	low	0.0010214	0.000658383
1305	1516	PC-3p-45963_41	CCACCCCGCCTCCTCTCGCCGCC	23	gi|347618787|ref|NC_010449.4|	+	69920169	69920431	gggggcggcggccgggggcgccggagggtccactgagcttcctccccacCCTCCCCGCCTCCTCTCGCCGCCttt	0						3'	New	gp4a	..(((((((((..(((((((..(((((((.....(((....)))...))))))).)))))))..)))))))))..	71	78.7	-46.3	0.8	30	125	27.96	134.12	middle	6.74e-23	7.87e-24
1324	1537	PC-5p-145874_7	GGCCCCGTCGTCCTCTCCC	19	gi|347618787|ref|NC_010449.4|	+	128176512	128176770	ctgcacctgctggcacctgccaccaggcctttggggaacaggGGCCCCGTGGTCCTCTCCCagaagctggagggtacctgtagccctgccgggtgccctaaaggccgtgagtggctgtgccgggaggtggtg	0						5'	New	gp4a	...(((((.(((((((..((((((((((((((((((....(((((..((.(((.((((((........)))))).)))))..)))))........))))))))))).)).))))).))))))).)))))...	126	68.2	-79.4	0.9	1	7	0.931999	7.51072	low	0.0090072	0.00810578
1337	1553	PC-5p-146_22121	CGAACGAGACTCTGGCA	17	gi|347618787|ref|NC_010449.4|	-	13058115	13058373	ataggtcatttatttgggaagCAAACGAGACTCTGGCAtcgcacttgaatgccatgtttcttgtcgtcctcaaagccact	0						5'	New	gp4a	...(((......(((((((.((((..(((((..((((((((....)).)))))).)))))))))..))).)))))))...	74	45	-20.9	0.6	7383	20628	6880.95	22133	high	0	0
1351	1569	PC-3p-42824_46	GCCCCCGGCGTCCCGTCCC	19	gi|347618787|ref|NC_010449.4|	-	44896676	44896934	gccggaatggccttgaagtagggagcgacggcgagggggggagggggagagcgtggcgcccacccagggtcccctcgcagcccctctcccccaGCCCTCGGCGTCCCGTCCCgccacggcccctcctcc	0						3'	New	gp4a	...(((..((((.((.....((((..((((.((((((((((((((((...(((.((..(((.....)))..))..)))...)))))))))))...))))).))))...))))..)).))))..)))...	123	76.7	-72.9	0.7	7	50	6.52399	53.648	middle	2.5e-12	6.56e-13
1383	1609	PC-5p-585614_2	GTGCTGTGCAGTAGGACCCACTGT	24	gi|347618787|ref|NC_010449.4|	-	119071109	119071372	cttctggacatagttccctGTGCTGTGCAGTAGGACCCACTGAatagataagataagcggtgggtcctactgcacagcatagggaactatgtccagtat	0						5'	New	gp4a	...(((((((((((((((((((((((((((((((((((((((..((.......))..)))))))))))))))))))))))))))))))))))))))...	93	48.5	-81.3	1.7	0	5	0	5.3648	low	0.009413	0.01708
1399	1626	PC-3p-480964_2	CCTCATCCTGCCTCTTCCCTCA	22	gi|347618788|ref|NC_010448.3|	+	25442029	25442290	gatcagtatgaggtaggaggagagcagggaagggctgggctggcagggtggcaacacaagggctgCCTCATCCTGCCTCTTCCCTCAgatctgcat	0						3'	New	gp4a	...(((..((((...(((((((.((((((..((((.((.((......(((....)))..)).))))))..)))))))))))))))))...)))...	90	59.4	-42.9	0.8	0	4	0	4.29184	low	0.020204	0.038547
1421	1651	PC-3p-46470_41	GGGTGCGCCCCCGGGGCCGC	20	gi|347618788|ref|NC_010448.3|	+	58025332	58025591	ctgcccggggcctcggggtccgggtcctgggcgccgtcgggggccggggagggcggccggcagcgccccagcgcgaaggaggactgcccggtcggtggtcgcccGGGTGCGCCCCCGGGGCCCCgggaag	0						3'	New	gp4a	...(((((((((((((((..((...((((((((((..((...((((((.((.....((....((((....))))...))....)).))))))))..)).))))))))..)).)))))))))))))))...	124	84.6	-89.5	0.8	22	82	20.504	87.9828	middle	1.22e-14	6.68e-15
1429	1661	PC-5p-127147_9	ATTTTCACCAAGCGTTGGA	19	gi|347618788|ref|NC_010448.3|	+	80429693	80429951	tgacctaaatcacagtgacATTTTCACCAAGCCTTGGAaagtaacgagatttcctgagacactctgaggtgggggcgagagtacacgctgggtgttcttggagg	0						5'	New	gp4a	...((...(((.(((((..((((((.((..((((..((..((..((........))..))..))..))))...)).))))))...))))))))......))...	98	50	-27.6	0.5	0	9	0	9.65665	low	0.00049433	0.000291727
1435	1668	PC-5p-45078_44	CGCGCGGCGCCTCGCCTCG	19	gi|347618788|ref|NC_010448.3|	+	86797595	86797853	tcaggcCGCGCGGCGCCTCGCCGCGcaccggcggggggcctggcccgcggggtcactgcacggagccgggcagtgtgtggtggtggtggtggtgcagcgcggccggt	0						5'	New	gp4a	...((((((((.((((((((((((.(((((.((....(((((((((((((.....))))..)).)))))))....)))))))))))))).))))).))))))))...	101	80.4	-71.7	0.8	48	81	44.7359	86.9098	middle	5.33e-07	4.71e-07
1438	1672	PC-3p-29951_80	GTTACAGCCGCCTGTCTCTGGT	22	gi|347618788|ref|NC_010448.3|	+	90797417	90797678	agtacctacaggacCAGGGACAGGCCGCTGCACCTCTtgctcagttcagggaaggaGTTACAGCCGCCTGTCTCTGGTcctgggggtgac	0						3'	New	gp4a	..((((..(((((((((((((((((.((((...(((((.(((......))).)))))...)))).)))))))))))))))))..))))..	86	61.1	-58.1	1.1	103	221	95.9959	237.124	middle	5.41e-23	3.35e-23
1460	1696	PC-5p-1939715_1	GCCTCTTCCCAGGGGGAAAACCGCGGGGC	29	gi|347618788|ref|NC_010448.3|	-	865764	866022	gagggcggccctgcgggaGCCTCTTCCCAGGGGGAAAACCGCGGGGCcggggggcgtcgtggggccctgggtggcctccgaacacgtccgcgagcgggtgctccgggccgccaccggcgCGGGGTGGTGGTCTGTGGGtgcgtgctccagcgtggccctcgcgtgcctcacttcctaagggcccgcggggtcgaccagctgtcccggcc	0						5'	New	gp4a	..((((((((((((((...(((((.....)))))....)))))))))))..((((((((.((((((......)))))))))...)))))..((((..(..(((((((((((((((.......)))))))))))).)))..)..))))(((((((((((.((((.((((..........)))).))))))))).))..)))).)))....	44	77	-119.8	0.7	0	4	0	4.29184	low	0.020204	0.038547
1460	1697	PC-3p-108972_11	CGGGGTGGTGGTCTGTGGG	19	gi|347618788|ref|NC_010448.3|	-	865764	866022	gagggcggccctgcgggaGCCTCTTCCCAGGGGGAAAACCGCGGGGCcggggggcgtcgtggggccctgggtggcctccgaacacgtccgcgagcgggtgctccgggccgccaccggcgCGGGGTGGTGGTCTGTGGGtgcgtgctccagcgtggccctcgcgtgcctcacttcctaagggcccgcggggtcgaccagctgtcccggcc	0						3'	New	gp4a	..((((((((((((((...(((((.....)))))....)))))))))))..((((((((.((((((......)))))))))...)))))..((((..(..(((((((((((((((.......)))))))))))).)))..)..))))(((((((((((.((((.((((..........)))).))))))))).))..)))).)))....	44	77	-119.8	0.7	14	44	13.048	47.2103	middle	1.04e-07	7.87e-08
1461	1698	PC-5p-207_17587	CGGTCGAACTTGACTATCTAGAGGA	25	gi|347618788|ref|NC_010448.3|	-	874101	874365	cgctactaccgattggatggtttagtgaggccctcggatcggccccgccggggtcggcccacggccctggcggagcgctgagaagaCGGTCGAACTTGACTATCTAGAGGAagtaaaagtcgtaacaaggtttccGTAGGTGAACCTGCGGAAGGATCATTAacgttggcgagagcgtggcaagcggcggcggcccgcgtctgcctgcccgcccgccctgctcgctctct	0						5'	New	gp4a	...((((.((..(((((((((..(((..((((.((...(((((.((((((((((((.....))))))))))))...)))))...)).))))..)))..))))))))).)).))))..........(((.(((((((((((....)))))))).........))).)))..(((((((.((((.(.(((((((((..((....))..).))).))))))))))))))))).	112	63	-114.5	0.8	181098	178116	168783	191111	high	0	0
1461	1699	PC-3p-619_6141	GTAGGTGAACCTGCGGAAGGATCATTA	27	gi|347618788|ref|NC_010448.3|	-	874101	874365	cgctactaccgattggatggtttagtgaggccctcggatcggccccgccggggtcggcccacggccctggcggagcgctgagaagaCGGTCGAACTTGACTATCTAGAGGAagtaaaagtcgtaacaaggtttccGTAGGTGAACCTGCGGAAGGATCATTAacgttggcgagagcgtggcaagcggcggcggcccgcgtctgcctgcccgcccgccctgctcgctctct	0						3'	New	gp4a	...((((.((..(((((((((..(((..((((.((...(((((.((((((((((((.....))))))))))))...)))))...)).))))..)))..))))))))).)).))))..........(((.(((((((((((....)))))))).........))).)))..(((((((.((((.(.(((((((((..((....))..).))).))))))))))))))))).	112	63	-114.5	0.8	15695	49390	14627.7	52993.5	high	0	0
1467	1705	PC-5p-161332_6	CAGGGTCTCGCTGGGCGTGTGAC	23	gi|347618788|ref|NC_010448.3|	-	4684298	4684560	tgatgctggagcacctcgggactcacacccggcatgactcatggcacggctcggcctcCAGGGTCTCGCTGGGCGTGTGACctgtgtccagcacagcgcctggtgtttggtaaacatcggtgcaggagaagcggcaaggggcgtatatttcatcacgatccCGCAGGGTCAAGTCACTGGA	0						5'	New	gp4a	...(((((((.(((...(((...(((.((((((..(((((.(((...(((...))).))))))))..)))))).)))...)))))))))))))..(((((.(((((((...))))))))))))......((.(((..(..(......)..).....(((((....)))))..))).))...	90	60.8	-71.9	0.7	1	8	0.931999	8.58368	low	0.0043709	0.00395829
1476	1718	PC-5p-212662_4	AAGAATCCATCAATGCTGCAGCT	23	gi|347618788|ref|NC_010448.3|	-	32858464	32858726	aaaAAGAATCCATCAATGCTGCAGCTgtggtgtagttcaAAGCTGCAGCTTGGATTCTCTA	0						5'	New	gp4a	....((((((((.....(((((((((.(((......))).))))))))).))))))))...	54	42.6	-28.1	1.1	3	8	2.796	8.58368	low	0.034571	0.03191
1503	1749	PC-3p-118479_9	CGAGGCCTCTCCGAGTCCG	19	gi|347618788|ref|NC_010448.3|	-	65898028	65898286	agctggaaacttcgcgacggggccggtgatcccgctgccacgcactgggcccgccccgggggcggtgtcgccccgcccccaccgcctgggggaagggttttctgcagactcgcccgaaccCGCGGCCTCTCCGAGTCCGggcagctccctccggcctgtctctgcggctcccgggtc	0						3'	New	gp4a	..((((.....(((((((.(((((((.......((((((.((.(((.((...(((.(((((((((.(((((((..((((((.....))))))..))))........))))))))....)))).)))....)).))).)))))))).....))))))))))...))))...))))...	172	75.1	-84.5	0.6	2	14	1.864	15.0214	middle	0.00022109	0.000232046
1508	1755	PC-3p-100548_13	GCGCGCGCGCGCGCGTGCGCGCGGG	25	gi|347618788|ref|NC_010448.3|	-	74611525	74611789	gaacagtgtgtgtgtgtgtgtgtgtgtgtgtgtGCGCGCGCGCGCGCGTGCGCGCGTGttgggg	0						3'	New	gp4a	...(((..((((((..((((((((((((((....))))))))))))))..))))))..)))...	58	67.2	-40.5	0.9	0	13	0	13.9485	middle	2.8264e-05	1.12e-05
1553	1811	PC-3p-305677_3	TGTGACCTGTGGGCAAATGACT	22	gi|347618789|ref|NC_010447.4|	+	17362832	17363093	gagagattaagtcatttgcccacgggtcacacagcagctgTGTGACCTGTGGGCAAATGACTtaagactata	0						3'	New	gp4a	...((.((((((((((((((((((((((((((((...))))))))))))))))))))))))))))..))...	66	47.2	-50.6	1.5	0	3.5	0	3.75536	low	0.029815	0.038547
1609	1879	PC-3p-305677_3	TGTGACCTGTGGGCAAATGACT	22	gi|347618789|ref|NC_010447.4|	-	17400863	17401124	gagagattaagtcatttgcccacgggtcacacagcagctgTGTGACCTGTGGGCAAATGACTtaagactata	0						3'	New	gp4a	...((.((((((((((((((((((((((((((((...))))))))))))))))))))))))))))..))...	66	47.2	-50.6	1.5	0	3.5	0	3.75536	low	0.029815	0.038547
1556	1815	PC-3p-295726_3	GTTGTTTTTCTTGGCTTATCTCGCTG	26	gi|347618789|ref|NC_010447.4|	+	20330249	20330514	aacgctcacagactgtgtggtaagacttggaagagacaaaaggccttagagctaGTTGTTTTTCTTGGCTTATCTCGCTGtcgttgctgt	0						3'	New	gp4a	...((.....(((.(((.((((((.(..((.((((((((..(((......)))..))))))))))..))))))).))).)))...))...	84	45.6	-27.5	0.7	0	5	0	5.3648	low	0.009413	0.01708
1559	1818	PC-5p-1898514_1	GTTAGGAGAGGAGCTGAGAAAGG	23	gi|347618789|ref|NC_010447.4|	+	23214588	23214849	agagcaggcagtcatacctGTTAGGAGAGGAGCTGAGAAAGGggctgagccggactgaCCCCCTTCCAACTCCCTCCACAcaggtgggtgaactccctgcagc	0						5'	New	gp4a	...(((((.((((((((((((..((((.((((.((.(((.((((..(........)..)))).))))).))))))))..))))))..)))).)).)))))...	97	60.2	-45.7	0.7	0	4	0	4.29184	low	0.020204	0.038547
1568	1832	PC-3p-384600_2	TCCAGGCACTAGTCTCTCAA	20	gi|347618789|ref|NC_010447.4|	+	64904846	64905105	taaggtcaaacagagagagctgcatggagctctggtgtcctgagcagcttcttctaattttgTCCAGGCACTAGTCTCTCAAagcctcagctttctcaactggactatg	0						3'	New	gp4a	...((((.....((((((((((....(((..((((((.((((..(((............)))..))))))))))...))).......)))))))))).....))))...	103	47.7	-39	0.8	0	5	0	5.3648	low	0.009413	0.01708
1600	1869	PC-5p-146308_7	CACTCCTCCCCTGTGTGCCAGGT	23	gi|347618789|ref|NC_010447.4|	-	4411801	4412063	catttggtgaaatggcagccatcttagCACTCCTCCCCTGTGTGCCAGGTcctgggctagaagctggcacaggggggtggggagcggggactggtagtgcatagcagccagcac	0						5'	New	gp4a	...(((((......((((((((((..((.((((.((((..((((((((.((........))..))))))))..)))).)))).))..))).))))..)))......)))))...	108	61.4	-52.9	0.8	1	12	0.931999	12.8755	middle	0.00025134	0.000209114
1605	1874	PC-5p-25755_93	GTGCGGTGCGTGCGTGTC	18	gi|347618789|ref|NC_010447.4|	-	8859639	8859900	agaagggatgctGTGCGGTGCGTGCGTGTGtgcgtgcatacgtacgtgcgtgcgtacgtgcgtgcatccttgcg	0						5'	New	gp4a	...((((((((((..((.((((..((..(((((((....)))))))..))..))))))..)).))))))))...	68	62.2	-44	1	6	116	5.59199	124.463	middle	3.99e-32	2.71e-36
1613	1884	PC-3p-40760_49	CCCCGCGCGGCTCCCTCCA	19	gi|347618789|ref|NC_010447.4|	-	22964522	22964780	aaactggaggtggtggagggcaggagggggcaggagggggcagGAGGATGGGTGCAAACCGAGAccccctctCCCCGCCCGGCTCCCTCCAagatctccacctccaatcaggcc	0						3'	New	gp4a	...((((.((.((((((((...(((((((((.((.((((..(((.((...(((....)))....)).)))..))))..)).)))))))))....)))))))).))..))))...	108	67.5	-62.5	0.8	14	45	13.048	48.2832	middle	5.77e-08	4.41e-08
1658	1941	PC-3p-323257_3	ATTGGAGAGTTCAAGTCGA	19	gi|347618790|ref|NC_010446.4|	+	30193092	30193350	gttgttgagtgtgcttgaggctttcccatgaaATTGGAGAGTTCAAGTCGAtacacagcccaggtctgaggatttatt	0						3'	New	gp4a	...((((.((((((((((.(((((((.........)))))))))))))..)))).))))....(((....))).....	56	44.9	-20.4	0.6	0	4	0	4.29184	low	0.020204	0.038547
1697	1986	PC-5p-36397_57	ATGGGTTCGCCCCGAG	16	gi|347618790|ref|NC_010446.4|	+	141680447	141680705	ccagacagagtaATGGGTTCGCCCCGTGcgagcacagcaccggggcgagcttctgtccca	0						5'	New	gp4a	...((((((......((((((((((((((.......))).)))))))))))))))))...	54	65	-32.7	0.8	1	92	0.931999	98.7124	middle	3.69e-28	5.65e-34
1700	1990	PC-3p-160591_6	TGGCGGCACCCCTGCTGCAGA	21	gi|347618790|ref|NC_010446.4|	-	1006128	1006388	gtggcaggcagcagggaggtcgcctgctgagcccggctggTGGCGGCACCCCTGCTGCAGGcnnn	0						3'	New	gp4a	...((..(((((((((..((((((.((((....))))....))))))..)))))))))..))...	59	72.3	-39.5	0.8	2	7	1.864	7.51072	low	0.027311	0.0246957
1702	1992	PC-3p-112287_10	CGGGGTGTGGGGAGGGCCA	19	gi|347618790|ref|NC_010446.4|	-	1220169	1220427	agccccgagcctgagagcctgtccctgcttccagCGGGGTGTGGGGAGGGCCCtgggctcgggcag	0						3'	New	gp4a	.(.(((((((((.((.((((.((((..(..((....))..)..)))))))).))))))))))))..	63	74.2	-40.6	0.8	3	14	2.796	15.0214	middle	0.0006769	0.000817259
1733	2026	PC-3p-61446_26	CCGGGGGAGAGGGTGTA	17	gi|347618790|ref|NC_010446.4|	-	93113785	93114043	caactcggttagtctcgcgtgtggattgtggccctgggctcgctgctcctccgtggtcgctgagaaggatttgggtggaCCGGGGGAGAGGGGGTAaagagcggcagaatccgcgatccgtctctagttaattaaagccgagagg	0						3'	New	gp4a	...(((((((((...((..((((((((.((((.((..((((.((.((((((((...((((..(((....)))..))))..)))))))))).))))..)).))..)).))))))))...))...)))..........))))))...	139	59.3	-54.4	0.6	7	28.5	6.52399	30.5794	middle	2.97e-06	2.77e-06
1774	2070	PC-5p-127605_9	GGGGAACTCCCAGACCAGCTTC	22	gi|347618791|ref|NC_010445.3|	+	10664350	10664611	ttaactgctaggccacgGGGGAACTCCCAGACCAGCTTCcactcccttcaagaAGCTGGTCTGGGAGTTCCCGGGtggcctagtagtgac	0						5'	New	gp4a	...(((((((((((((..(((((((((((((((((((((............)))))))))))))))))))))..)))))))))))))...	84	58.9	-70	1.3	4	27.5	3.728	29.5064	middle	2.45e-07	1.23e-07
1782	2081	PC-5p-129345_9	GTCCGACGATCCAGGGA	17	gi|347618791|ref|NC_010445.3|	+	26954500	26954757	ggctctgcagccaccgagactggcttcaaGTCCGACGACCCAGGGAtctcccacatccaagtccatcaccctccctaggccattgctgggagatgcagattctgatgcaggaggtgtggggcggggcttgagagcctccgggtgatgtggacgc	0						5'	New	gp4a	.((((..((..((((..((..((((((((((((..((.((((...((((((..((((..((((...((..(((((..(((....)))))))).))..))))..))))..)))))).)))).)))))))))).))))))..)))).))..)).))	153	62.3	-63.4	0.7	5	13	4.65999	13.9485	middle	0.0077802	0.00928829
1784	2084	PC-3p-50676_36	GACGGACCCCAGCGGAGA	18	gi|347618791|ref|NC_010445.3|	+	29432834	29433091	aatggtttcggggctgcggaaccttcagccggggaacgttcggtggggatacgcacctccaGCCGGACCCCAGCGGAGAgtgcaccctggggccggggaccgcaatagcggccgcaccgtgggcaagttgggc	0						3'	New	gp4a	..((((..(((((.(((...((((((.((.((((....((((((((((........))))).))))))))).)))))).))))))))))..)))).((.((((....))))))...(((.........)))..	93	69.2	-57.7	0.6	17	26	15.844	27.897	middle	0.0095429	0.00768848
1821	2130	PC-5p-1779511_2	ACCGCAGCTGCCGGCCCAGGAGA	23	gi|347618791|ref|NC_010445.3|	+	108959015	108959277	tACCGCAGCTGCCGGCCCAGGAGCgtaaaattccgccctgggcagcacctgcgccc	0						5'	New	gp4a	...(((((.(((..(((((((.(((........)))))))))).))).)))))...	50	69.6	-31.7	0.8	0	4	0	4.29184	low	0.020204	0.038547
1834	2147	PC-5p-254332_3	TGTGGCACAGACACTGCTGG	20	gi|347618791|ref|NC_010445.3|	-	98207	98466	ttctgtTGTGGCACAGACACTGCTGGgggtgcccccatcctgtttgccagCCCCTGCAGTGTCTGTGCCACCtcaagc	0						5'	New	gp4a	...((..((((((((((((((((.((((.((....((.......)).)).)))).))))))))))))))))..))...	72	61.5	-45	0.9	5	10	4.65999	10.7296	middle	0.044781	0.0431921
1843	2158	PC-3p-316056_3	TGAGCTCAGGTGCAAAGCGGA	21	gi|347618791|ref|NC_010445.3|	-	6656700	6656960	gaacttcagctttgcgccgagagctcagctacaaagcgccaggggtTGAGCTCAGGTGCAAAGCGGAgatg	0						3'	New	gp4a	...((((.((((((((((..((((((((((.............)))))))))).))))))))))))))...	65	57.7	-37.1	0.9	0	4	0	4.29184	low	0.020204	0.038547
1846	2161	PC-5p-127605_9	GGGGAACTCCCAGACCAGCTTC	22	gi|347618791|ref|NC_010445.3|	-	10664348	10664609	gtcactactaggccaccCGGGAACTCCCAGACCAGCTTCttgaagggagtggaAGCTGGTCTGGGAGTTCCcccgtggcctagcagttaa	0						5'	New	gp4a	...(((.(((((((((..((((((((((((((((((((((..........))))))))))))))))))))))..))))))))).)))...	84	58.9	-66.1	1.2	4	27.5	3.728	29.5064	middle	2.45e-07	1.23e-07
1864	2185	PC-5p-12649_243	GGAGTCGGGTTGCTTGGGA	19	gi|347618791|ref|NC_010445.3|	-	39237675	39237933	acagacaagaacgcaggctctGGAGTCGGATTGCTTGGGAttcgtcctgggccccaccacttactagctgggcagtcctaggccagtgacttaacttctctgtgtttcagtgtcctc	0						5'	New	gp4a	...((((.(((((((((.....((((((....((((((((((.(((((((......)))..........))))))))))))))...))))))......)))))))))...))))...	111	54.7	-39.7	0.6	108	248	100.656	266.094	middle	1.3e-27	7.79e-28
1896	2222	PC-3p-209059_4	TTGCAATGATGTCGTAATTTG	21	gi|347618791|ref|NC_010445.3|	-	77747947	77748207	ttaaagacaacaggttgacattaggttttgcTTGCAATGATGTCATAATTTGcgtcttact	0						3'	New	gp4a	...(((((..((..(((((((((....(((....)))))))))))..)..)).)))))...	55	34.4	-12.6	0.6	0	10	0	10.7296	middle	0.00024042	0.000129263
1900	2227	PC-3p-91132_14	GCGCGCGTGCGCGCGTGCGCGCGGG	25	gi|347618791|ref|NC_010445.3|	-	99658666	99658928	tgtgtgtgtgtgtgtgtgtgtgtgtGCGCGCGTGCGCGCGTGCGCGCGCGggg	0						3'	New	gp4a	((((((((..((((((..(((((....)))))..))))))..))))))))...	50	71.7	-33	0.9	0	63	0	67.5965	middle	3.05e-20	9.16e-25
1992	2333	PC-3p-210122_4	TGCTCTGCAGTGCCCCACCTTG	22	gi|347618792|ref|NC_010444.3|	+	149836588	149836849	cttgcagcaAGGTGGGGTGCTCCAGAGGCGCtgcctccttcctgggTGCTCTGCAGTGCCCCACCTTGctgcttg	0						3'	New	gp4a	...((((((((((((((..((.(((((.(((..((........)))))))))).))..))))))))))))))...	69	65.3	-49.8	1	0	6	0	6.43776	low	0.0044478	0.00756808
2009	2355	PC-5p-11657_276	GCGCGCGGTCGCCCGGGGA	19	gi|347618792|ref|NC_010444.3|	-	5365914	5366172	ggcgcccacaGCGCGCGGCCGCCCGGGGAatgagtcctcgggaacgtctgcgcctgggcctc	0						5'	New	gp4a	((.(((((..(((((.(((..((((((((.....))))))))...)))))))).))))))).	61	77.4	-35	0.7	41	301	38.212	322.961	middle	9.67e-67	6.16e-73
2012	2359	PC-5p-341727_2	ACTCTCCGAGGGGCCTTCAAGGG	23	gi|347618792|ref|NC_010444.3|	-	7444591	7444852	ttaggttcctttttcACTCTCCGAGGGGCCTTCAAGGGcaagttcttgtcaccTTTGTTGGCTCCTCTGAAGTGAgaaggaaaccttc	0						5'	New	gp4a	..(((((.((((((((((.((.((((((((..(((((((((....)))...))))))..)))))))).)))))))))))).)))))..	84	48.9	-42.7	1	1	6	0.931999	6.43776	low	0.018655	0.0328563
2016	2364	PC-3p-84130_16	CGGGGGAGAGGGTGTAAA	18	gi|347618792|ref|NC_010444.3|	-	16698133	16698392	gacttgctagttcacataccttccctgagggcaaggcctaacCGGGGGAGGGGGTGTAAAtcagcaaaca	0						3'	New	gp4a	...(((((..((.((((.(((((((((.((((...))))...)))))))))..)))).))..)))))...	64	54.3	-30.4	0.8	19	39.5	17.708	42.3819	middle	4.28e-05	5.15e-05
2021	2370	PC-3p-122435_11	GGCCCACGGGGGCCCGGGCA	20	gi|347618792|ref|NC_010444.3|	-	18873406	18873665	cccaccaggctgcgcccacctgaagggcaagaccagcgtcctatttatctgcggtccctaagggcccgctagagggcctggcacattgtaagtcctagaggtgccccttgaattGGCCCATGGGGGCCCGGGCAgagggatagccgctgatagctgaccttttggaagggacggaatggtgct	0						3'	New	gp4a	..(((((..(((..(((..(..(((((..((..(((((..(((((..(((((((((((((.(((((.....(((((....((((.((.((.....)).))))))))))).....))))).))))))))...)))))..))))).)))))....))..)))))..)..))).)))..)))))..	179	61.2	-85	0.8	2	9	1.864	9.65665	low	0.0069403	0.00689259
2035	2386	PC-3p-81641_18	GGATTCCCTCAGTAACGG	18	gi|347618792|ref|NC_010444.3|	-	44655557	44655824	aacccattctaaaccctaattaggtttttgcctgtgtgagtctgtccctctctgcatgaagtagGGATTCACTCAGTAACGGaaaactgattatatgggtccaagatggatc	0						3'	New	gp4a	...(((((....(((((((((((.(((..(.(((.((((....((((((..((......)).)))))))))).)))...)..))).)))))))...))))....)))))...	106	42.9	-33.5	0.7	1	17	0.931999	18.2403	middle	7.452e-06	4.78e-06
2070	2422	PC-3p-400545_2	TGTAGCTTCTGGGCTTTCC	19	gi|347618792|ref|NC_010444.3|	-	133057585	133057843	cttcagtcgcaccctgaagcccaccctgagcatgcagacggggatgttTGTAGCTTCTGGGCTTTCCtctgtgctgtct	0						3'	New	gp4a	...(((.((((....((((((((....((((.((((((((....)))))))))))).))))))))....)))))))...	73	57	-30	0.7	0	6	0	6.43776	low	0.0044478	0.00756808
2074	2426	PC-5p-1528096_1	CTGTCAGTGTTTCTTTCCTTTCTGTC	26	gi|347618792|ref|NC_010444.3|	-	139595376	139595633	tattgttttatgactctcttgtcgtcttcCTGTCAGTGTTTCTTTCCTTTCTGTCtcccatgcccggcacctgcagaaagtgatctttccgaGACAGGACGATGTGCTCAtctccttcctgcctctggctcacatgtttgagaga	0						5'	New	gp4a	.............(((((..((((((.(((((((..((......((((((((((...((......)).....)))))))).))......)).))))))).)))).)).............(((...)))..........))))).	87	48.3	-35.5	0.5	0	4	0	4.29184	low	0.020204	0.038547
2074	2427	PC-3p-493585_2	GACAGGACGATGTGCTCA	18	gi|347618792|ref|NC_010444.3|	-	139595376	139595633	tattgttttatgactctcttgtcgtcttcCTGTCAGTGTTTCTTTCCTTTCTGTCtcccatgcccggcacctgcagaaagtgatctttccgaGACAGGACGATGTGCTCAtctccttcctgcctctggctcacatgtttgagaga	0						3'	New	gp4a	.............(((((..((((((.(((((((..((......((((((((((...((......)).....)))))))).))......)).))))))).)))).)).............(((...)))..........))))).	87	48.3	-35.5	0.5	0	10	0	10.7296	middle	0.00024042	0.000129263
2079	2433	PC-5p-217406_4	GAGGAGGAGGGAAGAAAGGCTGC	23	gi|347618792|ref|NC_010444.3|	-	146762365	146762627	gcagtGAGGAGGAGGGAAGAAAGGCTGCtgctgttcttctcgcAGTCTTCCAGCCCTCCCCCTGCagc	0						5'	New	gp4a	((((...((.((((((....((((((((.............))))))))....))))))))))))...	65	61.8	-30.6	0.7	1	7.5	0.931999	8.0472	low	0.0062709	0.00810577
2080	2435	PC-5p-217406_4	GAGGAGGAGGGAAGAAAGGCTGC	23	gi|347618792|ref|NC_010444.3|	-	146862965	146863227	gcagtGAGGAGGAGGGAAGAAAGGCTGCtgctgttcttctcgcAGTCTTCCAGCCCTCCCCCTGCagc	0						5'	New	gp4a	((((...((.((((((....((((((((.............))))))))....))))))))))))...	65	61.8	-30.6	0.7	1	7.5	0.931999	8.0472	low	0.0062709	0.00810577
2081	2437	PC-5p-195018_5	TGTTGAGACAATTGAGAGATGA	22	gi|347618792|ref|NC_010444.3|	-	147020887	147021148	agtgacgactatcatacttcctggaccaaatgtgtgaccgtgggccaatatagccatgtaccttgtagggcTGTTGAGACAATTGAGAGATGAttgctaaattcattatttacatctcttaattgtctcaacagccctacaagaatgaatgtagcagttctggcacatagtcaacatgcagtgaagttgtcagtagtcttt	0						5'	New	gp4a	...(((.(((..((.((((((((......((((.((((..((.((((..(..(((((....(((((((((((((((((((((((((((((((.....(((((.....)))))))))))))))))))))))))))))))))))).....)))..))..)..)))).))..)))))))).))).)))))))..))).)))...	195	40.8	-85.7	1	0	6.5	0	6.97424	low	0.0030697	0.00335338
2103	2464	PC-3p-173116_5	TTTGGGTGACTGTAGCGCAG	20	gi|347618793|ref|NC_010443.4|	+	23466854	23467113	ccagcaaaggcctgaggtcccagccctgccaagccTTTGGGTGGCTGTAGCGCAGgccagtgtctt	0						3'	New	gp4a	...(((..((((((..((..(((((...((((....))))..)))))..)).))))))..)))...	60	63.6	-28.6	0.7	0	5	0	5.3648	low	0.009413	0.01708
2122	2484	PC-5p-223915_4	AGTGGGAGATTCCCACTGT	19	gi|347618793|ref|NC_010443.4|	+	88092682	88092940	aactcttaaattagttttggtaggtAGTAGGAGATTCCCACTGTttgatgctcttttctcatcaccttgatatgaagcgatgatgaaagaaatttacaaggagatcctgctgaatagcattgagaact	0						5'	New	gp4a	...((((((........((.((..((((((((..((((...(((..(((..(((((..(((((..(((......))).)))))..))))).))).))).)))).))))))))..)).))))))))...	122	36.7	-33	0.7	0	4	0	4.29184	low	0.020204	0.038547
2129	2492	PC-5p-37249_59	GCGGGGCGCGCGGTCGCCCGGG	22	gi|347618793|ref|NC_010443.4|	+	114105488	114105749	ggcgggGCGGGGCGGGCGGTCGCCCGGGgcggcggcggcggcggcggcggccgttggggtgcgaccgtccccgccccttt	0						5'	New	gp4a	...(((((((((...((((((((((...(((((.((.((....)).)).)))))...)).)))))))))))))))))...	74	88.8	-59.2	0.8	6	162	5.59199	173.82	middle	1.29e-45	4.12e-53
2152	2516	PC-5p-2790_1427	ATCCGACTGTTTAATTAA	18	gi|347618793|ref|NC_010443.4|	+	175485496	175485754	agaaacATCCGACTTTTTAATTAAtataatgtagatttttattttaaattgaattttaaattttaaataatttttatttaagtaaaataaattaaatttgattaacaaattattaatgaatgggtgttcac	0						5'	New	gp4a	.(.((((((((....(((.(((((((...(((..((((((((((((..((((((...(((((......)))))..)))))).)))))))))........)))..)))...)))))))))))))))))))..	128	14.5	-18.9	1	365	1082	340.18	1160.94	middle	0	2.6e-150
2155	2519	PC-3p-608_6218	TGAGAGGTGTAGAATAA	17	gi|347618793|ref|NC_010443.4|	+	211499444	211499701	aaaagcaaaaacaaataaatctctctctctttgtatatttctatatatatcagtgtctggtcacTGAGAGGTGTAGAATAAtcacaagggatacttgatttttaatgtgtctttactgat	0						3'	New	gp4a	...((.(((.(((...(((((....((.((((((....((((((((...((((((......))))))...)))))))).....)))))))).....)))))......))).))).))...	114	30	-27.4	0.8	1349	7856	1257.27	8429.18	middle	0	0
2201	2570	PC-5p-313272_3	GTTGGTGGAGTCTGGAGGA	19	gi|347618793|ref|NC_010443.4|	-	23615247	23615505	tagtcttggaaccgagcaGTTGGTGGAGGCTGGAGGAattttgagaaatatgatagaaaaagcctagatggccttgaacagactgttaataagaata	0						5'	New	gp4a	...(((((......((((((..((.((((((..(((..((((..............))))..)))....))))))..))..))))))..)))))...	91	40.2	-22.7	0.6	0	4	0	4.29184	low	0.020204	0.038547
2232	2604	PC-5p-36399_58	TTGACTATCTAGAGGAAGTA	20	gi|347618793|ref|NC_010443.4|	-	123962726	123962985	ttgacaggtcacttaatgctctTTGACTATCTAGAGGAAGCAgccattctaggcgatcaaattccatactagaaagcaggccagagacaagtgccttgtgtt	0						5'	New	gp4a	...(((((.(((((....(((((((.((.(((((.((((...(((......))).......))))...))))).)))))...))))..))))).)))))...	96	44.1	-28.7	0.6	9	34.5	8.38799	37.0171	middle	4.46e-07	1.98e-07
2265	2642	PC-5p-84470_18	GCGTTGTGGTATAGTGG	17	gi|347618793|ref|NC_010443.4|	-	231992187	231992444	gtttGCGTTGTGGTGTAGTGGtaacaaacacaactattacccttaaggatgcaggt	0						5'	New	gp4a	..(((((((..((.((((((((..........)))))))))).....)))))))..	52	42.9	-14.4	0.6	4	16	3.728	17.1674	middle	0.00049599	0.000676293

## Sheet: KEGG_significant
Table S2. Pathways regulated by miRNAs in mammary gland.
Pathway Id	pathway description	S gene number	TS gene number	B gene number	TB gene number	P value
4020	Calcium signaling pathway	48	1825	48	1934	0.0596099
5146	Amoebiasis	43	1825	43	1934	0.0802377
4144	Endocytosis	69	1825	70	1934	0.0853478
4360	Axon guidance	40	1825	40	1934	0.0958618
5140	Leishmaniasis	37	1825	37	1934	0.114495
4612	Antigen processing and presentation	37	1825	37	1934	0.114495
4620	Toll-like receptor signaling pathway	36	1825	36	1934	0.121471
5322	Systemic lupus erythematosus	33	1825	33	1934	0.145026
4146	Peroxisome	32	1825	32	1934	0.153843
3008	Ribosome biogenesis in eukaryotes	32	1825	32	1934	0.153843
4666	Fc gamma R-mediated phagocytosis	32	1825	32	1934	0.153843
5416	Viral myocarditis	31	1825	31	1934	0.16319
4142	Lysosome	55	1825	56	1934	0.164555
4270	Vascular smooth muscle contraction	30	1825	30	1934	0.1731
5145	Toxoplasmosis	52	1825	53	1934	0.188427
520	Amino sugar and nucleotide sugar metabolism	27	1825	27	1934	0.206548
4920	Adipocytokine signaling pathway	27	1825	27	1934	0.206548
4514	Cell adhesion molecules (CAMs)	48	1825	49	1934	0.224975
510	N-Glycan biosynthesis	25	1825	25	1934	0.232328
4622	RIG-I-like receptor signaling pathway	25	1825	25	1934	0.232328
5210	Colorectal cancer	25	1825	25	1934	0.232328
4940	Type I diabetes mellitus	25	1825	25	1934	0.232328
5142	Chagas disease (American trypanosomiasis)	47	1825	48	1934	0.23502
4150	mTOR signaling pathway	24	1825	24	1934	0.246389
10	Glycolysis / Gluconeogenesis	24	1825	24	1934	0.246389
5100	Bacterial invasion of epithelial cells	23	1825	23	1934	0.261292
4120	Ubiquitin mediated proteolysis	44	1825	45	1934	0.267485
4623	Cytosolic DNA-sensing pathway	22	1825	22	1934	0.277089
5160	Hepatitis C	43	1825	44	1934	0.279113
4970	Salivary secretion	21	1825	21	1934	0.293831
4670	Leukocyte transendothelial migration	41	1825	42	1934	0.303632
4370	VEGF signaling pathway	20	1825	20	1934	0.311575
5332	Graft-versus-host disease	19	1825	19	1934	0.330379
3013	RNA transport	56	1825	58	1934	0.354375
4650	Natural killer cell mediated cytotoxicity	37	1825	38	1934	0.35791
380	Tryptophan metabolism	17	1825	17	1934	0.371427
4971	Gastric acid secretion	17	1825	17	1934	0.371427
620	Pyruvate metabolism	17	1825	17	1934	0.371427
310	Lysine degradation	17	1825	17	1934	0.371427
5219	Bladder cancer	17	1825	17	1934	0.371427
4962	Vasopressin-regulated water reabsorption	17	1825	17	1934	0.371427
4930	Type II diabetes mellitus	17	1825	17	1934	0.371427
4530	Tight junction	35	1825	36	1934	0.387757
3040	Spliceosome	53	1825	55	1934	0.390939
5340	Primary immunodeficiency	16	1825	16	1934	0.393808
830	Retinol metabolism	16	1825	16	1934	0.393808
140	Steroid hormone biosynthesis	16	1825	16	1934	0.393808
4960	Aldosterone-regulated sodium reabsorption	15	1825	15	1934	0.417523
20	Citrate cycle (TCA cycle)	15	1825	15	1934	0.417523
3018	RNA degradation	32	1825	33	1934	0.435969
640	Propanoate metabolism	14	1825	14	1934	0.442653
500	Starch and sucrose metabolism	14	1825	14	1934	0.442653
4330	Notch signaling pathway	14	1825	14	1934	0.442653
4130	SNARE interactions in vesicular transport	14	1825	14	1934	0.442653
4512	ECM-receptor interaction	31	1825	32	1934	0.452953
5020	Prion diseases	13	1825	13	1934	0.46928
51	Fructose and mannose metabolism	13	1825	13	1934	0.46928
5144	Malaria	30	1825	31	1934	0.470387
4916	Melanogenesis	30	1825	31	1934	0.470387
4062	Chemokine signaling pathway	63	1825	66	1934	0.483223
4115	p53 signaling pathway	29	1825	30	1934	0.488264
52	Galactose metabolism	12	1825	12	1934	0.497494
4973	Carbohydrate digestion and absorption	12	1825	12	1934	0.497494
565	Ether lipid metabolism	12	1825	12	1934	0.497494
4310	Wnt signaling pathway	45	1825	47	1934	0.499684
5200	Pathways in cancer	111	1825	117	1934	0.506373
5212	Pancreatic cancer	28	1825	29	1934	0.506574
4810	Regulation of actin cytoskeleton	61	1825	64	1934	0.507962
4380	Osteoclast differentiation	44	1825	46	1934	0.514308
4010	MAPK signaling pathway	77	1825	81	1934	0.514591
4974	Protein digestion and absorption	27	1825	28	1934	0.525305
564	Glycerophospholipid metabolism	27	1825	28	1934	0.525305
5412	Arrhythmogenic right ventricular cardiomyopathy (ARVC)	27	1825	28	1934	0.525305
30	Pentose phosphate pathway	11	1825	11	1934	0.527388
512	Mucin type O-Glycan biosynthesis	10	1825	10	1934	0.55906
910	Nitrogen metabolism	10	1825	10	1934	0.55906
3020	RNA polymerase	10	1825	10	1934	0.55906
4662	B cell receptor signaling pathway	25	1825	26	1934	0.563964
4114	Oocyte meiosis	40	1825	42	1934	0.574631
230	Purine metabolism	55	1825	58	1934	0.584799
5222	Small cell lung cancer	39	1825	41	1934	0.590094
2010	ABC transporters	9	1825	9	1934	0.592616
770	Pantothenate and CoA biosynthesis	9	1825	9	1934	0.592616
511	Other glycan degradation	9	1825	9	1934	0.592616
514	Other types of O-glycan biosynthesis	9	1825	9	1934	0.592616
1100	Metabolic pathways	426	1825	452	1934	0.601052
3015	mRNA surveillance pathway	23	1825	24	1934	0.604076
280	Valine, leucine and isoleucine degradation	23	1825	24	1934	0.604076
5150	Staphylococcus aureus infection	23	1825	24	1934	0.604076
4520	Adherens junction	23	1825	24	1934	0.604076
5323	Rheumatoid arthritis	53	1825	56	1934	0.611002
4722	Neurotrophin signaling pathway	37	1825	39	1934	0.621354
5330	Allograft rejection	22	1825	23	1934	0.624609
4730	Long-term depression	22	1825	23	1934	0.624609
591	Linoleic acid metabolism	8	1825	8	1934	0.628166
100	Steroid biosynthesis	8	1825	8	1934	0.628166
4950	Maturity onset diabetes of the young	8	1825	8	1934	0.628166
4742	Taste transduction	8	1825	8	1934	0.628166
4740	Olfactory transduction	8	1825	8	1934	0.628166
5410	Hypertrophic cardiomyopathy (HCM)	36	1825	38	1934	0.63711
5211	Renal cell carcinoma	21	1825	22	1934	0.645414
5221	Acute myeloid leukemia	21	1825	22	1934	0.645414
5143	African trypanosomiasis	21	1825	22	1934	0.645414
590	Arachidonic acid metabolism	21	1825	22	1934	0.645414
71	Fatty acid metabolism	21	1825	22	1934	0.645414
4510	Focal adhesion	65	1825	69	1934	0.651875
4660	T cell receptor signaling pathway	35	1825	37	1934	0.652921
983	Drug metabolism - other enzymes	7	1825	7	1934	0.665829
531	Glycosaminoglycan degradation	7	1825	7	1934	0.665829
1040	Biosynthesis of unsaturated fatty acids	7	1825	7	1934	0.665829
532	Glycosaminoglycan biosynthesis - chondroitin sulfate	7	1825	7	1934	0.665829
3450	Non-homologous end-joining	7	1825	7	1934	0.665829
4964	Proximal tubule bicarbonate reclamation	7	1825	7	1934	0.665829
5218	Melanoma	20	1825	21	1934	0.66645
4976	Bile secretion	20	1825	21	1934	0.66645
561	Glycerolipid metabolism	20	1825	21	1934	0.66645
5414	Dilated cardiomyopathy	34	1825	36	1934	0.668763
3320	PPAR signaling pathway	33	1825	35	1934	0.68461
4210	Apoptosis	33	1825	35	1934	0.68461
5320	Autoimmune thyroid disease	19	1825	20	1934	0.687672
4070	Phosphatidylinositol signaling system	32	1825	34	1934	0.700434
533	Glycosaminoglycan biosynthesis - keratan sulfate	6	1825	6	1934	0.705727
430	Taurine and hypotaurine metabolism	6	1825	6	1934	0.705727
740	Riboflavin metabolism	6	1825	6	1934	0.705727
601	Glycosphingolipid biosynthesis - lacto and neolacto series	6	1825	6	1934	0.705727
630	Glyoxylate and dicarboxylate metabolism	6	1825	6	1934	0.705727
62	Fatty acid elongation	6	1825	6	1934	0.705727
480	Glutathione metabolism	18	1825	19	1934	0.709027
270	Cysteine and methionine metabolism	17	1825	18	1934	0.730455
5213	Endometrial cancer	17	1825	18	1934	0.730455
4720	Long-term potentiation	17	1825	18	1934	0.730455
4972	Pancreatic secretion	30	1825	32	1934	0.7319
4914	Progesterone-mediated oocyte maturation	29	1825	31	1934	0.74748
604	Glycosphingolipid biosynthesis - ganglio series	5	1825	5	1934	0.747993
450	Selenocompound metabolism	5	1825	5	1934	0.747993
4710	Circadian rhythm - mammal	5	1825	5	1934	0.747993
4122	Sulfur relay system	5	1825	5	1934	0.747993
603	Glycosphingolipid biosynthesis - globo series	5	1825	5	1934	0.747993
592	alpha-Linolenic acid metabolism	5	1825	5	1934	0.747993
53	Ascorbate and aldarate metabolism	5	1825	5	1934	0.747993
130	Ubiquinone and other terpenoid-quinone biosynthesis	5	1825	5	1934	0.747993
670	One carbon pool by folate	5	1825	5	1934	0.747993
4614	Renin-angiotensin system	5	1825	5	1934	0.747993
5223	Non-small cell lung cancer	16	1825	17	1934	0.751889
4621	NOD-like receptor signaling pathway	16	1825	17	1934	0.751889
5220	Chronic myeloid leukemia	28	1825	30	1934	0.762915
4012	ErbB signaling pathway	27	1825	29	1934	0.77817
120	Primary bile acid biosynthesis	4	1825	4	1934	0.792766
4744	Phototransduction	4	1825	4	1934	0.792766
290	Valine, leucine and isoleucine biosynthesis	4	1825	4	1934	0.792766
5216	Thyroid cancer	14	1825	15	1934	0.79447
5310	Asthma	14	1825	15	1934	0.79447
4110	Cell cycle	51	1825	55	1934	0.805318
4260	Cardiac muscle contraction	25	1825	27	1934	0.807998
562	Inositol phosphate metabolism	25	1825	27	1934	0.807998
3022	Basal transcription factors	13	1825	14	1934	0.815439
260	Glycine, serine and threonine metabolism	13	1825	14	1934	0.815439
330	Arginine and proline metabolism	24	1825	26	1934	0.822496
240	Pyrimidine metabolism	36	1825	39	1934	0.826188
600	Sphingolipid metabolism	12	1825	13	1934	0.836059
5217	Basal cell carcinoma	12	1825	13	1934	0.836059
730	Thiamine metabolism	3	1825	3	1934	0.840193
460	Cyanoamino acid metabolism	3	1825	3	1934	0.840193
524	Butirosin and neomycin biosynthesis	3	1825	3	1934	0.840193
5215	Prostate cancer	34	1825	37	1934	0.848303
4910	Insulin signaling pathway	46	1825	50	1934	0.852924
350	Tyrosine metabolism	11	1825	12	1934	0.856216
650	Butanoate metabolism	11	1825	12	1934	0.856216
4672	Intestinal immune network for IgA production	21	1825	23	1934	0.863866
860	Porphyrin and chlorophyll metabolism	10	1825	11	1934	0.875783
340	Histidine metabolism	10	1825	11	1934	0.875783
4664	Fc epsilon RI signaling pathway	20	1825	22	1934	0.876816
5214	Glioma	20	1825	22	1934	0.876816
4080	Neuroactive ligand-receptor interaction	43	1825	47	1934	0.87871
5010	Alzheimer's disease	68	1825	74	1934	0.881006
61	Fatty acid biosynthesis	2	1825	2	1934	0.890429
300	Lysine biosynthesis	2	1825	2	1934	0.890429
920	Sulfur metabolism	2	1825	2	1934	0.890429
790	Folate biosynthesis	2	1825	2	1934	0.890429
400	Phenylalanine, tyrosine and tryptophan biosynthesis	2	1825	2	1934	0.890429
534	Glycosaminoglycan biosynthesis - heparan sulfate	9	1825	10	1934	0.894619
4060	Cytokine-cytokine receptor interaction	64	1825	70	1934	0.904927
4610	Complement and coagulation cascades	28	1825	31	1934	0.906972
4975	Fat digestion and absorption	17	1825	19	1934	0.912592
4145	Phagosome	75	1825	82	1934	0.913696
4350	TGF-beta signaling pathway	27	1825	30	1934	0.915465
982	Drug metabolism - cytochrome P450	16	1825	18	1934	0.923365
4912	GnRH signaling pathway	25	1825	28	1934	0.93123
4966	Collecting duct acid secretion	15	1825	17	1934	0.933502
4141	Protein processing in endoplasmic reticulum	70	1825	77	1934	0.935776
980	Metabolism of xenobiotics by cytochrome P450	14	1825	16	1934	0.94297
471	D-Glutamine and D-glutamate metabolism	1	1825	1	1934	0.94364
232	Caffeine metabolism	1	1825	1	1934	0.94364
472	D-Arginine and D-ornithine metabolism	1	1825	1	1934	0.94364
40	Pentose and glucuronate interconversions	6	1825	7	1934	0.945118
360	Phenylalanine metabolism	6	1825	7	1934	0.945118
5016	Huntington's disease	67	1825	74	1934	0.947122
5012	Parkinson's disease	55	1825	61	1934	0.947768
3420	Nucleotide excision repair	22	1825	25	1934	0.951693
3030	DNA replication	13	1825	15	1934	0.951739
5014	Amyotrophic lateral sclerosis (ALS)	13	1825	15	1934	0.951739
4320	Dorso-ventral axis formation	5	1825	6	1934	0.959324
563	Glycosylphosphatidylinositol(GPI)-anchor biosynthesis	5	1825	6	1934	0.959324
4140	Regulation of autophagy	12	1825	14	1934	0.959783
970	Aminoacyl-tRNA biosynthesis	12	1825	14	1934	0.959783
250	Alanine, aspartate and glutamate metabolism	11	1825	13	1934	0.967081
4540	Gap junction	19	1825	22	1934	0.968215
3430	Mismatch repair	10	1825	12	1934	0.973617
4977	Vitamin digestion and absorption	9	1825	11	1934	0.979381
410	beta-Alanine metabolism	9	1825	11	1934	0.979381
72	Synthesis and degradation of ketone bodies	3	1825	4	1934	0.982473
3050	Proteasome	23	1825	27	1934	0.984537
3010	Ribosome	22	1825	26	1934	0.986822
4640	Hematopoietic cell lineage	29	1825	34	1934	0.989715
4340	Hedgehog signaling pathway	13	1825	16	1934	0.989738
4630	Jak-STAT signaling pathway	37	1825	43	1934	0.991122
3410	Base excision repair	12	1825	15	1934	0.99196
3440	Homologous recombination	12	1825	15	1934	0.99196
900	Terpenoid backbone biosynthesis	6	1825	8	1934	0.992077
190	Oxidative phosphorylation	54	1825	62	1934	0.993271
3060	Protein export	11	1825	14	1934	0.99384
760	Nicotinate and nicotinamide metabolism	5	1825	7	1934	0.994838

## Sheet: KEGG_miRNA_Gene
Table S3. KEGG function annotation.
KEGG_ID	Gene_ID	miRNA	Gene_Name	KEGG_Name
4020	100048958	ssc-miR-339	GNA14	Calcium signaling pathway
4020	100152101	ssc-miR-339	SLC8A3	Calcium signaling pathway
4020	100525092	ssc-miR-339	LOC100525092	Calcium signaling pathway
4020	397126	ssc-miR-339	PTGFR	Calcium signaling pathway
4020	497623	ssc-miR-339	P2RX7	Calcium signaling pathway
4020	100517196	ssc-miR-103	LOC100517196	Calcium signaling pathway
4020	100525092	ssc-miR-103	LOC100525092	Calcium signaling pathway
4020	100157641	ssc-miR-92b-5p	PLCB2	Calcium signaling pathway
4020	100516962	ssc-miR-92b-5p	ATP2A1	Calcium signaling pathway
4020	100520061	ssc-miR-92b-5p	LOC100520061	Calcium signaling pathway
4020	100516581	ssc-let-7a	LOC100516581	Calcium signaling pathway
4020	397119	ssc-miR-34c	PLCD4	Calcium signaling pathway
4020	497623	ssc-miR-34c	P2RX7	Calcium signaling pathway
4020	552898	ssc-miR-34c	ADRA1D	Calcium signaling pathway
4020	397126	cgr-let-7i_R+1	PTGFR	Calcium signaling pathway
4020	100152101	ssc-miR-202-5p_1ss16TC	SLC8A3	Calcium signaling pathway
4020	397126	ssc-miR-202-5p_1ss16TC	PTGFR	Calcium signaling pathway
4020	100516235	ssc-miR-142-3p	ITPKA	Calcium signaling pathway
4020	100516581	ssc-miR-142-3p	LOC100516581	Calcium signaling pathway
4020	414905	ssc-miR-142-3p	TNNC2	Calcium signaling pathway
4020	100157745	ssc-miR-20b	LOC100157745	Calcium signaling pathway
4020	100518537	ssc-miR-20b	GNA15	Calcium signaling pathway
4020	100521662	ssc-miR-20b	LOC100521662	Calcium signaling pathway
4020	397010	ssc-miR-20b	VDAC1	Calcium signaling pathway
4020	397636	ssc-miR-20b	ATP2B1	Calcium signaling pathway
4020	397010	bta-miR-660_1ss20CT	VDAC1	Calcium signaling pathway
4020	397126	bta-miR-660_1ss20CT	PTGFR	Calcium signaling pathway
4020	414911	bta-miR-660_1ss20CT	EDNRB	Calcium signaling pathway
4020	100157641	ssc-miR-186	PLCB2	Calcium signaling pathway
4020	100155015	ssc-miR-29a_L-1R-1	ITPR3	Calcium signaling pathway
4020	397158	ssc-miR-29a_L-1R-1	HTR7	Calcium signaling pathway
4020	397636	ssc-miR-29a_L-1R-1	ATP2B1	Calcium signaling pathway
4020	100157745	ssc-miR-628	LOC100157745	Calcium signaling pathway
4020	397457	ssc-miR-628	EDNRA	Calcium signaling pathway
4020	414911	ssc-miR-628	EDNRB	Calcium signaling pathway
4020	100157745	eca-miR-500	LOC100157745	Calcium signaling pathway
4020	100525092	eca-miR-500	LOC100525092	Calcium signaling pathway
4020	397457	eca-miR-500	EDNRA	Calcium signaling pathway
4020	100155015	ssc-mir-4339-p3_1ss22GT	ITPR3	Calcium signaling pathway
4020	100157745	ssc-mir-4339-p3_1ss22GT	LOC100157745	Calcium signaling pathway
4020	100310801	ssc-mir-4339-p3_1ss22GT	PHKG2	Calcium signaling pathway
4020	100513431	ssc-mir-4339-p3_1ss22GT	CACNA1G	Calcium signaling pathway
4020	100514402	ssc-mir-4339-p3_1ss22GT	ADCY8	Calcium signaling pathway
4020	100520061	ssc-mir-4339-p3_1ss22GT	LOC100520061	Calcium signaling pathway
4020	100521662	ssc-mir-4339-p3_1ss22GT	LOC100521662	Calcium signaling pathway
4020	100157641	ssc-miR-423-5p	PLCB2	Calcium signaling pathway
4020	100310801	ssc-miR-423-5p	PHKG2	Calcium signaling pathway
4020	100518537	ssc-miR-423-5p	GNA15	Calcium signaling pathway
4020	100521111	ssc-miR-423-5p	PLCD3	Calcium signaling pathway
4020	100525148	ssc-miR-423-5p	PLCB3	Calcium signaling pathway
4020	397557	ssc-miR-423-5p	NOS3	Calcium signaling pathway
4020	397652	ssc-miR-423-5p	PRKACA	Calcium signaling pathway
4020	552898	ssc-miR-423-5p	ADRA1D	Calcium signaling pathway
4020	100157641	ssc-miR-185	PLCB2	Calcium signaling pathway
4020	100525148	ssc-miR-185	PLCB3	Calcium signaling pathway
4020	396856	ssc-miR-185	RYR2	Calcium signaling pathway
4020	397119	ssc-miR-185	PLCD4	Calcium signaling pathway
4020	397126	ssc-miR-185	PTGFR	Calcium signaling pathway
4020	397457	ssc-miR-185	EDNRA	Calcium signaling pathway
4020	397636	ssc-miR-185	ATP2B1	Calcium signaling pathway
4020	397394	ssc-miR-769-3p_L-1	CAMK2G	Calcium signaling pathway
4020	100157745	ssc-miR-193a-3p	LOC100157745	Calcium signaling pathway
4020	100518537	ssc-miR-193a-3p	GNA15	Calcium signaling pathway
4020	100157641	ssc-miR-135	PLCB2	Calcium signaling pathway
4020	100158185	ssc-miR-135	LOC100158185	Calcium signaling pathway
4020	100511102	ssc-miR-135	CACNA1D	Calcium signaling pathway
4020	100520061	ssc-miR-135	LOC100520061	Calcium signaling pathway
4020	397457	ssc-miR-135	EDNRA	Calcium signaling pathway
4020	397557	ssc-miR-345-5p_R+1	NOS3	Calcium signaling pathway
4020	497623	ssc-miR-345-5p_R+1	P2RX7	Calcium signaling pathway
4020	100152101	ssc-miR-499-5p	SLC8A3	Calcium signaling pathway
4020	397126	ssc-miR-499-5p	PTGFR	Calcium signaling pathway
4020	497623	ssc-miR-499-5p	P2RX7	Calcium signaling pathway
4020	397158	ssc-miR-30d	HTR7	Calcium signaling pathway
4020	397457	ssc-miR-30d	EDNRA	Calcium signaling pathway
4020	397636	ssc-miR-30d	ATP2B1	Calcium signaling pathway
4020	397674	ssc-miR-30d	CAMK2D	Calcium signaling pathway
4020	552898	ssc-miR-30d	ADRA1D	Calcium signaling pathway
4020	100157641	hsa-mir-6087-p3	PLCB2	Calcium signaling pathway
4020	100521111	hsa-mir-6087-p3	PLCD3	Calcium signaling pathway
4020	397636	hsa-mir-6087-p3	ATP2B1	Calcium signaling pathway
4020	100521983	cgr-miR-19b-5p	TACR3	Calcium signaling pathway
4020	100156938	ssc-miR-26a	TRPC1	Calcium signaling pathway
4020	396603	ssc-miR-26a	PPP3CB	Calcium signaling pathway
4020	396859	ssc-miR-26a	NOS2	Calcium signaling pathway
4020	100514402	bta-miR-2404_R+8	ADCY8	Calcium signaling pathway
4020	397457	bta-miR-2404_R+8	EDNRA	Calcium signaling pathway
4020	100156938	ssc-mir-4338-p3	TRPC1	Calcium signaling pathway
4020	100158185	ssc-mir-4338-p3	LOC100158185	Calcium signaling pathway
4020	497623	ssc-mir-4338-p3	P2RX7	Calcium signaling pathway
4020	100514402	ssc-miR-18a_R+1	ADCY8	Calcium signaling pathway
4020	497623	ssc-miR-18a_R+1	P2RX7	Calcium signaling pathway
4020	100511102	ssc-miR-490-3p_R+1	CACNA1D	Calcium signaling pathway
4020	100514402	ssc-miR-490-3p_R+1	ADCY8	Calcium signaling pathway
4020	100521983	ssc-miR-490-3p_R+1	TACR3	Calcium signaling pathway
4020	397010	ssc-miR-490-3p_R+1	VDAC1	Calcium signaling pathway
4020	397457	ssc-miR-490-3p_R+1	EDNRA	Calcium signaling pathway
4020	396603	hsa-miR-103a-2-5p	PPP3CB	Calcium signaling pathway
4020	397636	hsa-miR-103a-2-5p	ATP2B1	Calcium signaling pathway
4020	100157745	ssc-miR-20a_R+2	LOC100157745	Calcium signaling pathway
4020	100521662	ssc-miR-20a_R+2	LOC100521662	Calcium signaling pathway
4020	397010	ssc-miR-20a_R+2	VDAC1	Calcium signaling pathway
4020	397636	ssc-miR-20a_R+2	ATP2B1	Calcium signaling pathway
4020	100157745	ssc-miR-1296-5p	LOC100157745	Calcium signaling pathway
4020	100525148	ssc-miR-1296-5p	PLCB3	Calcium signaling pathway
4020	397158	ssc-miR-1296-5p	HTR7	Calcium signaling pathway
4020	397457	ssc-miR-1296-5p	EDNRA	Calcium signaling pathway
4020	397636	ssc-miR-1296-5p	ATP2B1	Calcium signaling pathway
4020	100157745	ssc-miR-181a_R-1	LOC100157745	Calcium signaling pathway
4020	100525092	ssc-miR-181a_R-1	LOC100525092	Calcium signaling pathway
4020	397636	ssc-miR-181a_R-1	ATP2B1	Calcium signaling pathway
4020	100158185	bta-miR-677_R+4_1ss13CT	LOC100158185	Calcium signaling pathway
4020	100511102	bta-miR-677_R+4_1ss13CT	CACNA1D	Calcium signaling pathway
4020	397636	bta-miR-677_R+4_1ss13CT	ATP2B1	Calcium signaling pathway
4020	100152497	ssc-miR-19b	LOC100152497	Calcium signaling pathway
4020	397126	ssc-miR-19b	PTGFR	Calcium signaling pathway
4020	414911	ssc-miR-19b	EDNRB	Calcium signaling pathway
4020	497623	ssc-miR-19b	P2RX7	Calcium signaling pathway
4020	100155015	ssc-miR-29c_R-1	ITPR3	Calcium signaling pathway
4020	397158	ssc-miR-29c_R-1	HTR7	Calcium signaling pathway
4020	397636	ssc-miR-29c_R-1	ATP2B1	Calcium signaling pathway
4020	100525092	sha-mir-716a-p3_1ss5TC	LOC100525092	Calcium signaling pathway
4020	100048958	ssc-miR-193a-5p	GNA14	Calcium signaling pathway
4020	100152101	ssc-miR-193a-5p	SLC8A3	Calcium signaling pathway
4020	100157641	ssc-miR-193a-5p	PLCB2	Calcium signaling pathway
4020	100511102	ssc-miR-193a-5p	CACNA1D	Calcium signaling pathway
4020	100155015	ssc-miR-1306-5p	ITPR3	Calcium signaling pathway
4020	100521111	ssc-miR-1306-5p	PLCD3	Calcium signaling pathway
4020	100525092	ssc-miR-1306-5p	LOC100525092	Calcium signaling pathway
4020	397010	ssc-miR-1306-5p	VDAC1	Calcium signaling pathway
4020	397651	ssc-miR-1306-5p	VDAC1P5	Calcium signaling pathway
4020	552898	ssc-miR-1306-5p	ADRA1D	Calcium signaling pathway
4020	100525092	bta-miR-200c	LOC100525092	Calcium signaling pathway
4020	397457	bta-miR-200c	EDNRA	Calcium signaling pathway
4020	497623	bta-miR-200c	P2RX7	Calcium signaling pathway
4020	100514402	ssc-miR-92b-3p	ADCY8	Calcium signaling pathway
4020	100155015	ssc-miR-151-5p	ITPR3	Calcium signaling pathway
4020	100517196	ssc-miR-107_R-2	LOC100517196	Calcium signaling pathway
4020	100525092	ssc-miR-107_R-2	LOC100525092	Calcium signaling pathway
4020	100152497	ssc-miR-190a_R+2	LOC100152497	Calcium signaling pathway
4020	100158185	ssc-miR-190a_R+2	LOC100158185	Calcium signaling pathway
4020	397457	ssc-miR-190a_R+2	EDNRA	Calcium signaling pathway
4020	100157745	ssc-miR-365-3p	LOC100157745	Calcium signaling pathway
4020	100516581	ssc-miR-365-3p	LOC100516581	Calcium signaling pathway
4020	552898	ssc-miR-365-3p	ADRA1D	Calcium signaling pathway
4020	414905	ssc-miR-1307_R+1	TNNC2	Calcium signaling pathway
4020	100157745	mmu-miR-1983	LOC100157745	Calcium signaling pathway
4020	100518537	mmu-miR-1983	GNA15	Calcium signaling pathway
4020	100521111	mmu-miR-1983	PLCD3	Calcium signaling pathway
4020	397158	mmu-miR-1983	HTR7	Calcium signaling pathway
4020	100152497	ssc-miR-148b-3p	LOC100152497	Calcium signaling pathway
4020	100525092	ssc-miR-148b-3p	LOC100525092	Calcium signaling pathway
4020	397126	ssc-miR-148b-3p	PTGFR	Calcium signaling pathway
4020	397421	ssc-miR-148b-3p	PLN	Calcium signaling pathway
4020	397548	ssc-miR-671-3p	PHGK	Calcium signaling pathway
4020	100151877	ssc-miR-615	LOC100151877	Calcium signaling pathway
4020	397548	ssc-miR-615	PHGK	Calcium signaling pathway
4020	397636	hsa-miR-183-3p_L-1R+1	ATP2B1	Calcium signaling pathway
4020	100156938	mmu-mir-5105-p5	TRPC1	Calcium signaling pathway
4020	100522792	bta-miR-188_R-4	LOC100522792	Calcium signaling pathway
4020	397126	bta-miR-188_R-4	PTGFR	Calcium signaling pathway
4020	100511102	ssc-miR-101_R+1	CACNA1D	Calcium signaling pathway
4020	397421	ssc-miR-101_R+1	PLN	Calcium signaling pathway
4020	497623	ssc-miR-101_R+1	P2RX7	Calcium signaling pathway
4020	100155015	hsa-miR-185-3p_R-1	ITPR3	Calcium signaling pathway
4020	100157641	hsa-miR-185-3p_R-1	PLCB2	Calcium signaling pathway
4020	100310801	hsa-miR-185-3p_R-1	PHKG2	Calcium signaling pathway
4020	100511102	hsa-miR-185-3p_R-1	CACNA1D	Calcium signaling pathway
4020	100518537	hsa-miR-185-3p_R-1	GNA15	Calcium signaling pathway
4020	100521111	hsa-miR-185-3p_R-1	PLCD3	Calcium signaling pathway
4020	100521662	hsa-miR-185-3p_R-1	LOC100521662	Calcium signaling pathway
4020	100525148	hsa-miR-185-3p_R-1	PLCB3	Calcium signaling pathway
4020	396603	hsa-miR-185-3p_R-1	PPP3CB	Calcium signaling pathway
4020	397119	hsa-miR-185-3p_R-1	PLCD4	Calcium signaling pathway
4020	397636	hsa-miR-185-3p_R-1	ATP2B1	Calcium signaling pathway
4020	497623	hsa-miR-185-3p_R-1	P2RX7	Calcium signaling pathway
4020	100156938	ssc-miR-136_R-1	TRPC1	Calcium signaling pathway
4020	396603	ssc-miR-136_R-1	PPP3CB	Calcium signaling pathway
4020	100152497	oar-miR-485-3p	LOC100152497	Calcium signaling pathway
4020	100515957	oar-miR-485-3p	PPID	Calcium signaling pathway
4020	397158	mmu-miR-30f_L+1R-1_1ss17AG	HTR7	Calcium signaling pathway
4020	397457	mmu-miR-30f_L+1R-1_1ss17AG	EDNRA	Calcium signaling pathway
4020	397636	mmu-miR-30f_L+1R-1_1ss17AG	ATP2B1	Calcium signaling pathway
4020	397674	mmu-miR-30f_L+1R-1_1ss17AG	CAMK2D	Calcium signaling pathway
4020	552898	mmu-miR-30f_L+1R-1_1ss17AG	ADRA1D	Calcium signaling pathway
4020	100310801	ssc-mir-99b-p3	PHKG2	Calcium signaling pathway
4020	100516581	ssc-let-7c	LOC100516581	Calcium signaling pathway
4020	397158	ssc-miR-30e-5p	HTR7	Calcium signaling pathway
4020	397457	ssc-miR-30e-5p	EDNRA	Calcium signaling pathway
4020	397636	ssc-miR-30e-5p	ATP2B1	Calcium signaling pathway
4020	397674	ssc-miR-30e-5p	CAMK2D	Calcium signaling pathway
4020	552898	ssc-miR-30e-5p	ADRA1D	Calcium signaling pathway
4020	100517196	ssc-miR-125a_R-1	LOC100517196	Calcium signaling pathway
4020	100525148	ssc-miR-125a_R-1	PLCB3	Calcium signaling pathway
4020	552898	ssc-miR-125a_R-1	ADRA1D	Calcium signaling pathway
4020	100152101	ssc-miR-1343	SLC8A3	Calcium signaling pathway
4020	100157641	ssc-miR-1343	PLCB2	Calcium signaling pathway
4020	100157745	ssc-miR-1343	LOC100157745	Calcium signaling pathway
4020	100518537	ssc-miR-1343	GNA15	Calcium signaling pathway
4020	100521662	ssc-miR-1343	LOC100521662	Calcium signaling pathway
4020	497623	ssc-miR-1343	P2RX7	Calcium signaling pathway
4020	397126	hsa-miR-200c-5p	PTGFR	Calcium signaling pathway
4020	397457	hsa-miR-200c-5p	EDNRA	Calcium signaling pathway
4020	100155015	bta-mir-2887-2-p5	ITPR3	Calcium signaling pathway
4020	100156938	hsa-miR-26b-3p	TRPC1	Calcium signaling pathway
4020	100310801	hsa-miR-26b-3p	PHKG2	Calcium signaling pathway
4020	100520061	hsa-miR-26b-3p	LOC100520061	Calcium signaling pathway
4020	397457	ssc-miR-769-5p_R+1	EDNRA	Calcium signaling pathway
4020	100514402	eca-miR-507_L+2R-1_1ss16AT	ADCY8	Calcium signaling pathway
4020	100516235	eca-miR-507_L+2R-1_1ss16AT	ITPKA	Calcium signaling pathway
4020	397010	eca-miR-507_L+2R-1_1ss16AT	VDAC1	Calcium signaling pathway
4020	100152497	ssc-miR-140-5p_L+1	LOC100152497	Calcium signaling pathway
4020	100157745	ssc-miR-140-5p_L+1	LOC100157745	Calcium signaling pathway
4020	414911	ssc-miR-140-5p_L+1	EDNRB	Calcium signaling pathway
4020	100521983	ssc-miR-30a-5p_R+2	TACR3	Calcium signaling pathway
4020	397158	ssc-miR-30a-5p_R+2	HTR7	Calcium signaling pathway
4020	397457	ssc-miR-30a-5p_R+2	EDNRA	Calcium signaling pathway
4020	397636	ssc-miR-30a-5p_R+2	ATP2B1	Calcium signaling pathway
4020	397674	ssc-miR-30a-5p_R+2	CAMK2D	Calcium signaling pathway
4020	552898	ssc-miR-30a-5p_R+2	ADRA1D	Calcium signaling pathway
4020	100155015	bta-miR-21-3p_L+1R-1	ITPR3	Calcium signaling pathway
4020	100156938	bta-miR-21-3p_L+1R-1	TRPC1	Calcium signaling pathway
4020	100522792	bta-miR-21-3p_L+1R-1	LOC100522792	Calcium signaling pathway
4020	397636	bta-miR-21-3p_L+1R-1	ATP2B1	Calcium signaling pathway
4020	397652	bta-miR-21-3p_L+1R-1	PRKACA	Calcium signaling pathway
4020	497623	bta-miR-21-3p_L+1R-1	P2RX7	Calcium signaling pathway
4020	100525092	bta-miR-200b_R+1	LOC100525092	Calcium signaling pathway
4020	397457	bta-miR-200b_R+1	EDNRA	Calcium signaling pathway
4020	497623	bta-miR-200b_R+1	P2RX7	Calcium signaling pathway
4020	100511102	mmu-let-7a-2-3p_R+1	CACNA1D	Calcium signaling pathway
4020	397119	mmu-let-7a-2-3p_R+1	PLCD4	Calcium signaling pathway
4020	397158	mmu-let-7a-2-3p_R+1	HTR7	Calcium signaling pathway
4020	100152497	ssc-miR-744	LOC100152497	Calcium signaling pathway
4020	100511102	ssc-miR-744	CACNA1D	Calcium signaling pathway
4020	100514402	ssc-miR-744	ADCY8	Calcium signaling pathway
4020	396718	ssc-miR-744	RYR1	Calcium signaling pathway
4020	397652	ssc-miR-744	PRKACA	Calcium signaling pathway
4020	100525092	bta-mir-216b-p3_1ss13TC	LOC100525092	Calcium signaling pathway
4020	397457	bta-mir-216b-p3_1ss13TC	EDNRA	Calcium signaling pathway
4020	100048958	ssc-miR-4334-3p	GNA14	Calcium signaling pathway
4020	100152101	ssc-miR-4334-3p	SLC8A3	Calcium signaling pathway
4020	100525092	ssc-miR-4334-3p	LOC100525092	Calcium signaling pathway
4020	397126	ssc-miR-4334-3p	PTGFR	Calcium signaling pathway
4020	497623	ssc-miR-4334-3p	P2RX7	Calcium signaling pathway
4020	100152497	ssc-miR-1306-3p_R+1	LOC100152497	Calcium signaling pathway
4020	552898	ssc-miR-1306-3p_R+1	ADRA1D	Calcium signaling pathway
4020	100525148	mmu-mir-1983-p5_1ss1GA	PLCB3	Calcium signaling pathway
4020	397636	mmu-mir-1983-p5_1ss1GA	ATP2B1	Calcium signaling pathway
4020	100520061	ssc-miR-545-3p_R+1	LOC100520061	Calcium signaling pathway
4020	100152101	mmu-mir-5105-p3	SLC8A3	Calcium signaling pathway
4020	100525387	mmu-mir-5105-p3	CACNA1A	Calcium signaling pathway
4020	100514402	ssc-miR-363_R-1	ADCY8	Calcium signaling pathway
4020	100157641	hsa-miR-3065-5p	PLCB2	Calcium signaling pathway
4020	100511102	hsa-miR-3065-5p	CACNA1D	Calcium signaling pathway
4020	100520061	hsa-miR-3065-5p	LOC100520061	Calcium signaling pathway
4020	397158	hsa-miR-3065-5p	HTR7	Calcium signaling pathway
4020	100157745	ssc-miR-106a_R-1_1ss1AC	LOC100157745	Calcium signaling pathway
4020	100518537	ssc-miR-106a_R-1_1ss1AC	GNA15	Calcium signaling pathway
4020	397010	ssc-miR-106a_R-1_1ss1AC	VDAC1	Calcium signaling pathway
4020	397636	ssc-miR-106a_R-1_1ss1AC	ATP2B1	Calcium signaling pathway
4020	100152101	ssc-miR-2320-5p_R+1	SLC8A3	Calcium signaling pathway
4020	100310801	ssc-miR-2320-5p_R+1	PHKG2	Calcium signaling pathway
4020	100516581	ssc-miR-2320-5p_R+1	LOC100516581	Calcium signaling pathway
4020	397010	ssc-miR-2320-5p_R+1	VDAC1	Calcium signaling pathway
4020	397457	ssc-miR-2320-5p_R+1	EDNRA	Calcium signaling pathway
4020	100155015	ssc-miR-29b	ITPR3	Calcium signaling pathway
4020	397158	ssc-miR-29b	HTR7	Calcium signaling pathway
4020	397636	ssc-miR-29b	ATP2B1	Calcium signaling pathway
4020	100157745	ssc-miR-127	LOC100157745	Calcium signaling pathway
4020	100310801	eca-mir-1842-p3	PHKG2	Calcium signaling pathway
4020	396603	eca-mir-1842-p3	PPP3CB	Calcium signaling pathway
4020	552898	eca-mir-1842-p3	ADRA1D	Calcium signaling pathway
4020	100157745	ssc-miR-181c	LOC100157745	Calcium signaling pathway
4020	100155015	hsa-miR-127-5p	ITPR3	Calcium signaling pathway
4020	100511102	hsa-miR-127-5p	CACNA1D	Calcium signaling pathway
4020	397421	hsa-miR-127-5p	PLN	Calcium signaling pathway
4020	397457	hsa-miR-127-5p	EDNRA	Calcium signaling pathway
4020	100514402	ssc-miR-320_R-1	ADCY8	Calcium signaling pathway
4020	397010	ssc-miR-320_R-1	VDAC1	Calcium signaling pathway
4020	397119	ssc-miR-320_R-1	PLCD4	Calcium signaling pathway
4020	497623	ssc-miR-320_R-1	P2RX7	Calcium signaling pathway
4020	100514402	ssc-miR-148b-5p	ADCY8	Calcium signaling pathway
4020	397119	ssc-miR-148b-5p	PLCD4	Calcium signaling pathway
4020	397457	ssc-miR-148b-5p	EDNRA	Calcium signaling pathway
4020	414911	ssc-miR-148b-5p	EDNRB	Calcium signaling pathway
4020	100514402	ssc-miR-532-3p	ADCY8	Calcium signaling pathway
4020	100515957	ssc-miR-532-3p	PPID	Calcium signaling pathway
4020	100521111	ssc-miR-532-3p	PLCD3	Calcium signaling pathway
4020	397636	ssc-miR-532-3p	ATP2B1	Calcium signaling pathway
4020	397652	ssc-miR-532-3p	PRKACA	Calcium signaling pathway
4020	100155015	ssc-miR-331-3p_R-1	ITPR3	Calcium signaling pathway
4020	100521662	ssc-miR-331-3p_R-1	LOC100521662	Calcium signaling pathway
4020	552898	ssc-miR-331-3p_R-1	ADRA1D	Calcium signaling pathway
4020	100516581	ssc-mir-29b-2-p5	LOC100516581	Calcium signaling pathway
4020	396603	ssc-mir-29b-2-p5	PPP3CB	Calcium signaling pathway
4020	397158	ssc-mir-29b-2-p5	HTR7	Calcium signaling pathway
4020	497623	ssc-mir-29b-2-p5	P2RX7	Calcium signaling pathway
4020	552898	ssc-mir-29b-2-p5	ADRA1D	Calcium signaling pathway
4020	100521111	ssc-miR-149	PLCD3	Calcium signaling pathway
4020	100525387	ssc-miR-149	CACNA1A	Calcium signaling pathway
4020	397119	ssc-miR-149	PLCD4	Calcium signaling pathway
4020	397457	ssc-miR-149	EDNRA	Calcium signaling pathway
4020	497623	ssc-miR-149	P2RX7	Calcium signaling pathway
4020	100525092	ssc-miR-361-5p	LOC100525092	Calcium signaling pathway
4020	396603	ssc-miR-361-5p	PPP3CB	Calcium signaling pathway
4020	100152497	hsa-miR-574-5p	LOC100152497	Calcium signaling pathway
4020	100511102	hsa-miR-574-5p	CACNA1D	Calcium signaling pathway
4020	497623	hsa-miR-574-5p	P2RX7	Calcium signaling pathway
4020	100152101	ssc-mir-4332-p5_1ss19CA	SLC8A3	Calcium signaling pathway
4020	100156938	ssc-mir-4332-p5_1ss19CA	TRPC1	Calcium signaling pathway
4020	100157641	ssc-mir-4332-p5_1ss19CA	PLCB2	Calcium signaling pathway
4020	100516962	ssc-mir-4332-p5_1ss19CA	ATP2A1	Calcium signaling pathway
4020	100518537	ssc-mir-4332-p5_1ss19CA	GNA15	Calcium signaling pathway
4020	100521662	ssc-mir-4332-p5_1ss19CA	LOC100521662	Calcium signaling pathway
4020	396718	ssc-mir-4332-p5_1ss19CA	RYR1	Calcium signaling pathway
4020	397119	ssc-mir-4332-p5_1ss19CA	PLCD4	Calcium signaling pathway
4020	397548	ssc-mir-4332-p5_1ss19CA	PHGK	Calcium signaling pathway
4020	397557	ssc-mir-4332-p5_1ss19CA	NOS3	Calcium signaling pathway
4020	100156938	ssc-miR-324	TRPC1	Calcium signaling pathway
4020	100518537	ssc-miR-324	GNA15	Calcium signaling pathway
4020	397010	ssc-miR-324	VDAC1	Calcium signaling pathway
4020	497623	ssc-miR-324	P2RX7	Calcium signaling pathway
4020	100516581	ssc-let-7f	LOC100516581	Calcium signaling pathway
4020	100514402	ssc-miR-92a	ADCY8	Calcium signaling pathway
4020	100155015	hsa-miR-186-3p_L-1R+1	ITPR3	Calcium signaling pathway
4020	100520061	hsa-miR-186-3p_L-1R+1	LOC100520061	Calcium signaling pathway
4020	100525092	hsa-miR-186-3p_L-1R+1	LOC100525092	Calcium signaling pathway
4020	100152101	ssc-miR-491	SLC8A3	Calcium signaling pathway
4020	100155015	ssc-miR-491	ITPR3	Calcium signaling pathway
4020	100511102	ssc-miR-491	CACNA1D	Calcium signaling pathway
4020	100516962	ssc-miR-491	ATP2A1	Calcium signaling pathway
4020	100521662	ssc-miR-491	LOC100521662	Calcium signaling pathway
4020	397651	ssc-miR-491	VDAC1P5	Calcium signaling pathway
4020	100155015	eca-miR-1842_1ss9TC	ITPR3	Calcium signaling pathway
4020	100157641	eca-miR-1842_1ss9TC	PLCB2	Calcium signaling pathway
4020	100157745	eca-miR-1842_1ss9TC	LOC100157745	Calcium signaling pathway
4020	100516235	eca-miR-1842_1ss9TC	ITPKA	Calcium signaling pathway
4020	100521111	eca-miR-1842_1ss9TC	PLCD3	Calcium signaling pathway
4020	397119	eca-miR-1842_1ss9TC	PLCD4	Calcium signaling pathway
4020	552898	eca-miR-1842_1ss9TC	ADRA1D	Calcium signaling pathway
4020	100156938	ssc-mir-4331-p3	TRPC1	Calcium signaling pathway
4020	100157745	ssc-mir-4331-p3	LOC100157745	Calcium signaling pathway
4020	100516581	ssc-mir-4331-p3	LOC100516581	Calcium signaling pathway
4020	396603	ssc-mir-4331-p3	PPP3CB	Calcium signaling pathway
4020	397457	ssc-mir-4331-p3	EDNRA	Calcium signaling pathway
4020	397636	ssc-mir-4331-p3	ATP2B1	Calcium signaling pathway
4020	100520061	ssc-miR-425-5p	LOC100520061	Calcium signaling pathway
4020	100521111	ssc-miR-425-5p	PLCD3	Calcium signaling pathway
4020	397457	ssc-miR-425-5p	EDNRA	Calcium signaling pathway
4020	397651	ssc-miR-425-5p	VDAC1P5	Calcium signaling pathway
4020	497623	ssc-miR-425-5p	P2RX7	Calcium signaling pathway
4020	100157745	mmu-miR-20a-3p_R+1_1ss10CT	LOC100157745	Calcium signaling pathway
4020	100511102	mmu-miR-20a-3p_R+1_1ss10CT	CACNA1D	Calcium signaling pathway
4020	100514402	mmu-miR-20a-3p_R+1_1ss10CT	ADCY8	Calcium signaling pathway
4020	100520061	mmu-miR-20a-3p_R+1_1ss10CT	LOC100520061	Calcium signaling pathway
4020	100525092	mmu-miR-20a-3p_R+1_1ss10CT	LOC100525092	Calcium signaling pathway
4020	397636	mmu-miR-20a-3p_R+1_1ss10CT	ATP2B1	Calcium signaling pathway
4020	100157745	cfa-miR-200b	LOC100157745	Calcium signaling pathway
4020	397010	ssc-miR-376a-5p_R-1	VDAC1	Calcium signaling pathway
4020	100155015	cfa-miR-505_R+1	ITPR3	Calcium signaling pathway
4020	100157641	cfa-miR-505_R+1	PLCB2	Calcium signaling pathway
4020	100513431	cfa-miR-505_R+1	CACNA1G	Calcium signaling pathway
4020	100516235	cfa-miR-505_R+1	ITPKA	Calcium signaling pathway
4020	100518537	cfa-miR-505_R+1	GNA15	Calcium signaling pathway
4020	100521662	cfa-miR-505_R+1	LOC100521662	Calcium signaling pathway
4020	100310801	bta-miR-99a-3p_R+4	PHKG2	Calcium signaling pathway
4020	100310801	ssc-miR-497	PHKG2	Calcium signaling pathway
4020	100517196	ssc-miR-497	LOC100517196	Calcium signaling pathway
4020	100520061	ssc-miR-497	LOC100520061	Calcium signaling pathway
4020	100525092	ssc-miR-497	LOC100525092	Calcium signaling pathway
4020	397636	ssc-miR-191	ATP2B1	Calcium signaling pathway
4020	396603	ssc-miR-139-5p_R+1	PPP3CB	Calcium signaling pathway
4020	100152101	bta-mir-2404-1-p3_1ss20CG	SLC8A3	Calcium signaling pathway
4020	100513431	bta-mir-2404-1-p3_1ss20CG	CACNA1G	Calcium signaling pathway
4020	100516581	bta-mir-2404-1-p3_1ss20CG	LOC100516581	Calcium signaling pathway
4020	100521983	bta-mir-2404-1-p3_1ss20CG	TACR3	Calcium signaling pathway
4020	397158	bta-mir-2404-1-p3_1ss20CG	HTR7	Calcium signaling pathway
4020	397421	bta-mir-2404-1-p3_1ss20CG	PLN	Calcium signaling pathway
4020	100157641	hsa-mir-6087-p5_1ss13TC	PLCB2	Calcium signaling pathway
4020	100520061	hsa-mir-6087-p5_1ss13TC	LOC100520061	Calcium signaling pathway
4020	100525148	hsa-mir-6087-p5_1ss13TC	PLCB3	Calcium signaling pathway
4020	100157745	ssc-miR-296-3p_R+1	LOC100157745	Calcium signaling pathway
4020	100516962	ssc-miR-296-3p_R+1	ATP2A1	Calcium signaling pathway
4020	100525092	ssc-miR-296-3p_R+1	LOC100525092	Calcium signaling pathway
4020	414905	ssc-miR-296-3p_R+1	TNNC2	Calcium signaling pathway
4020	100152101	ssc-miR-30b-3p_R+1	SLC8A3	Calcium signaling pathway
4020	100516235	ssc-miR-30b-3p_R+1	ITPKA	Calcium signaling pathway
4020	100525092	ssc-miR-30b-3p_R+1	LOC100525092	Calcium signaling pathway
4020	397548	ssc-miR-30b-3p_R+1	PHGK	Calcium signaling pathway
4020	397557	ssc-miR-30b-3p_R+1	NOS3	Calcium signaling pathway
4020	100157745	bta-miR-652_R+1	LOC100157745	Calcium signaling pathway
4020	100525092	ssc-miR-301_1ss5CG	LOC100525092	Calcium signaling pathway
4020	397636	ssc-miR-301_1ss5CG	ATP2B1	Calcium signaling pathway
4020	100525092	ssc-miR-429	LOC100525092	Calcium signaling pathway
4020	397457	ssc-miR-429	EDNRA	Calcium signaling pathway
4020	397636	ssc-miR-429	ATP2B1	Calcium signaling pathway
4020	497623	ssc-miR-429	P2RX7	Calcium signaling pathway
4020	100152101	ssc-miR-31	SLC8A3	Calcium signaling pathway
4020	100310801	ssc-miR-31	PHKG2	Calcium signaling pathway
4020	396603	ssc-miR-31	PPP3CB	Calcium signaling pathway
4020	100514402	ssc-miR-138	ADCY8	Calcium signaling pathway
4020	100516235	ssc-miR-138	ITPKA	Calcium signaling pathway
4020	397652	ssc-miR-138	PRKACA	Calcium signaling pathway
4020	100514402	ssc-miR-1271_L+2R-2	ADCY8	Calcium signaling pathway
4020	100516235	ssc-miR-1271_L+2R-2	ITPKA	Calcium signaling pathway
4020	397010	ssc-miR-1271_L+2R-2	VDAC1	Calcium signaling pathway
4020	100514402	hsa-miR-378a-5p	ADCY8	Calcium signaling pathway
4020	397457	hsa-miR-378a-5p	EDNRA	Calcium signaling pathway
4020	497623	hsa-miR-378a-5p	P2RX7	Calcium signaling pathway
4020	100152101	cgr-miR-18a-3p	SLC8A3	Calcium signaling pathway
4020	100525148	cgr-miR-18a-3p	PLCB3	Calcium signaling pathway
4020	397119	cgr-miR-18a-3p	PLCD4	Calcium signaling pathway
4020	100516235	ssc-miR-143-5p_R+1	ITPKA	Calcium signaling pathway
4020	397421	ssc-miR-143-5p_R+1	PLN	Calcium signaling pathway
4020	497623	ssc-miR-143-5p_R+1	P2RX7	Calcium signaling pathway
4020	397119	bta-miR-34b_R+1	PLCD4	Calcium signaling pathway
4020	497623	bta-miR-34b_R+1	P2RX7	Calcium signaling pathway
4020	552898	bta-miR-34b_R+1	ADRA1D	Calcium signaling pathway
4020	100516581	ssc-miR-98	LOC100516581	Calcium signaling pathway
4020	497623	ssc-miR-98	P2RX7	Calcium signaling pathway
4020	100152497	ssc-miR-152	LOC100152497	Calcium signaling pathway
4020	100525092	ssc-miR-152	LOC100525092	Calcium signaling pathway
4020	397126	ssc-miR-152	PTGFR	Calcium signaling pathway
4020	397421	ssc-miR-152	PLN	Calcium signaling pathway
4020	397636	ssc-miR-505_L+1	ATP2B1	Calcium signaling pathway
4020	100152497	ssc-miR-24-3p	LOC100152497	Calcium signaling pathway
4020	100155015	ssc-miR-24-3p	ITPR3	Calcium signaling pathway
4020	100157745	ssc-miR-24-3p	LOC100157745	Calcium signaling pathway
4020	100310801	ssc-miR-24-3p	PHKG2	Calcium signaling pathway
4020	100518537	ssc-miR-24-3p	GNA15	Calcium signaling pathway
4020	397636	ssc-miR-24-3p	ATP2B1	Calcium signaling pathway
4020	497623	ssc-miR-24-3p	P2RX7	Calcium signaling pathway
4020	552898	ssc-miR-24-3p	ADRA1D	Calcium signaling pathway
4020	100518537	ssc-miR-423-3p	GNA15	Calcium signaling pathway
4020	100152497	ssc-miR-7	LOC100152497	Calcium signaling pathway
4020	100157641	bta-miR-2904_L+3R+3	PLCB2	Calcium signaling pathway
4020	100521983	bta-miR-2904_L+3R+3	TACR3	Calcium signaling pathway
4020	100157745	ssc-miR-17-5p	LOC100157745	Calcium signaling pathway
4020	100518537	ssc-miR-17-5p	GNA15	Calcium signaling pathway
4020	397010	ssc-miR-17-5p	VDAC1	Calcium signaling pathway
4020	397636	ssc-miR-17-5p	ATP2B1	Calcium signaling pathway
4020	100155015	ssc-miR-140-3p_R-1	ITPR3	Calcium signaling pathway
4020	100157641	ssc-miR-140-3p_R-1	PLCB2	Calcium signaling pathway
4020	397457	ssc-miR-140-3p_R-1	EDNRA	Calcium signaling pathway
4020	396603	bta-miR-26b	PPP3CB	Calcium signaling pathway
4020	396859	bta-miR-26b	NOS2	Calcium signaling pathway
4020	100511102	cfa-miR-33a_R+1	CACNA1D	Calcium signaling pathway
4020	100514402	cfa-miR-33a_R+1	ADCY8	Calcium signaling pathway
4020	100515957	ssc-miR-345-3p_L-1R+1	PPID	Calcium signaling pathway
4020	397636	ssc-miR-345-3p_L-1R+1	ATP2B1	Calcium signaling pathway
4020	397651	ssc-miR-345-3p_L-1R+1	VDAC1P5	Calcium signaling pathway
4020	100157641	bta-miR-346	PLCB2	Calcium signaling pathway
4020	100158185	bta-miR-346	LOC100158185	Calcium signaling pathway
4020	100525387	bta-miR-346	CACNA1A	Calcium signaling pathway
4020	396603	bta-miR-346	PPP3CB	Calcium signaling pathway
4020	397674	bta-miR-346	CAMK2D	Calcium signaling pathway
4020	397126	cgr-miR-29a-5p_R-2	PTGFR	Calcium signaling pathway
4020	414911	cgr-miR-29a-5p_R-2	EDNRB	Calcium signaling pathway
4020	100516581	ssc-miR-17-3p_R+1	LOC100516581	Calcium signaling pathway
4020	100521983	ssc-miR-17-3p_R+1	TACR3	Calcium signaling pathway
4020	100525387	ssc-miR-17-3p_R+1	CACNA1A	Calcium signaling pathway
4020	397010	ssc-miR-17-3p_R+1	VDAC1	Calcium signaling pathway
4020	397158	ssc-miR-17-3p_R+1	HTR7	Calcium signaling pathway
4020	552898	ssc-miR-17-3p_R+1	ADRA1D	Calcium signaling pathway
4020	397158	ssc-miR-2320-3p_R+1	HTR7	Calcium signaling pathway
4020	100157745	bta-mir-6529-p3	LOC100157745	Calcium signaling pathway
4020	100516581	bta-mir-6529-p3	LOC100516581	Calcium signaling pathway
4020	100516962	bta-mir-6529-p3	ATP2A1	Calcium signaling pathway
4020	100518537	bta-mir-6529-p3	GNA15	Calcium signaling pathway
4020	100521111	bta-mir-6529-p3	PLCD3	Calcium signaling pathway
4020	397010	bta-mir-6529-p3	VDAC1	Calcium signaling pathway
4020	497623	bta-mir-6529-p3	P2RX7	Calcium signaling pathway
4020	552898	bta-mir-6529-p3	ADRA1D	Calcium signaling pathway
4020	100152497	ssc-miR-19a	LOC100152497	Calcium signaling pathway
4020	397126	ssc-miR-19a	PTGFR	Calcium signaling pathway
4020	414911	ssc-miR-19a	EDNRB	Calcium signaling pathway
4020	497623	ssc-miR-19a	P2RX7	Calcium signaling pathway
4020	100157745	hsa-miR-191-3p_R-1_2ss6GA19CT	LOC100157745	Calcium signaling pathway
4020	100514402	hsa-miR-191-3p_R-1_2ss6GA19CT	ADCY8	Calcium signaling pathway
4020	100518537	hsa-miR-191-3p_R-1_2ss6GA19CT	GNA15	Calcium signaling pathway
4020	100525092	hsa-miR-191-3p_R-1_2ss6GA19CT	LOC100525092	Calcium signaling pathway
4020	397119	hsa-miR-191-3p_R-1_2ss6GA19CT	PLCD4	Calcium signaling pathway
4020	100514402	ssc-miR-148a-5p	ADCY8	Calcium signaling pathway
4020	397119	ssc-miR-148a-5p	PLCD4	Calcium signaling pathway
4020	414911	ssc-miR-148a-5p	EDNRB	Calcium signaling pathway
4020	100155015	ssc-miR-671-5p	ITPR3	Calcium signaling pathway
4020	100511102	ssc-miR-671-5p	CACNA1D	Calcium signaling pathway
4020	100525387	ssc-miR-671-5p	CACNA1A	Calcium signaling pathway
4020	397119	ssc-miR-671-5p	PLCD4	Calcium signaling pathway
4020	397457	ssc-miR-671-5p	EDNRA	Calcium signaling pathway
4020	100517196	ssc-miR-15a_R+3	LOC100517196	Calcium signaling pathway
4020	100520061	ssc-miR-15a_R+3	LOC100520061	Calcium signaling pathway
4020	100525092	ssc-miR-15a_R+3	LOC100525092	Calcium signaling pathway
4020	100152101	eca-miR-324-3p_L-2R+1	SLC8A3	Calcium signaling pathway
4020	100310801	eca-miR-324-3p_L-2R+1	PHKG2	Calcium signaling pathway
4020	100514402	eca-miR-324-3p_L-2R+1	ADCY8	Calcium signaling pathway
4020	100521662	eca-miR-324-3p_L-2R+1	LOC100521662	Calcium signaling pathway
4020	100525148	eca-miR-324-3p_L-2R+1	PLCB3	Calcium signaling pathway
4020	397119	eca-miR-324-3p_L-2R+1	PLCD4	Calcium signaling pathway
4020	100048958	ssc-miR-425-3p_L+1R-1	GNA14	Calcium signaling pathway
4020	100518537	ssc-mir-4332-p3	GNA15	Calcium signaling pathway
4020	100516962	mmu-mir-703-p5	ATP2A1	Calcium signaling pathway
4020	397158	ssc-miR-30c-5p_R+1	HTR7	Calcium signaling pathway
4020	397457	ssc-miR-30c-5p_R+1	EDNRA	Calcium signaling pathway
4020	397636	ssc-miR-30c-5p_R+1	ATP2B1	Calcium signaling pathway
4020	552898	ssc-miR-30c-5p_R+1	ADRA1D	Calcium signaling pathway
4020	100520061	sha-mir-716a-p5_1ss11TC	LOC100520061	Calcium signaling pathway
4020	497623	sha-mir-716a-p5_1ss11TC	P2RX7	Calcium signaling pathway
4020	100517196	ssc-miR-545-5p_R+1	LOC100517196	Calcium signaling pathway
4020	397010	ssc-miR-545-5p_R+1	VDAC1	Calcium signaling pathway
4020	397457	ssc-miR-545-5p_R+1	EDNRA	Calcium signaling pathway
4020	100514402	ssc-miR-885-3p	ADCY8	Calcium signaling pathway
4020	396603	ssc-miR-885-3p	PPP3CB	Calcium signaling pathway
4020	100521983	oar-miR-377-5p_1ss11TC	TACR3	Calcium signaling pathway
4020	497623	oar-miR-377-5p_1ss11TC	P2RX7	Calcium signaling pathway
4020	100157745	ssc-miR-181b_R-1	LOC100157745	Calcium signaling pathway
4020	100525092	ssc-miR-181b_R-1	LOC100525092	Calcium signaling pathway
4020	100514402	ssc-miR-326_R+1	ADCY8	Calcium signaling pathway
4020	100516235	ssc-miR-326_R+1	ITPKA	Calcium signaling pathway
4020	100520061	ssc-miR-326_R+1	LOC100520061	Calcium signaling pathway
4020	100521662	ssc-miR-326_R+1	LOC100521662	Calcium signaling pathway
4020	397158	ssc-miR-326_R+1	HTR7	Calcium signaling pathway
4020	397636	ssc-miR-326_R+1	ATP2B1	Calcium signaling pathway
4020	397652	ssc-miR-326_R+1	PRKACA	Calcium signaling pathway
5146	100048958	ssc-miR-339	GNA14	Amoebiasis
5146	100135665	ssc-miR-339	RELA	Amoebiasis
5146	100157406	ssc-miR-339	ACTN2	Amoebiasis
5146	100513489	ssc-miR-339	LOC100513489	Amoebiasis
5146	396851	ssc-miR-339	PIK3R5	Amoebiasis
5146	399541	ssc-miR-339	TLR4	Amoebiasis
5146	100514498	ssc-miR-103	LOC100514498	Amoebiasis
5146	396974	ssc-miR-103	VCL	Amoebiasis
5146	100153454	ssc-miR-92b-5p	COL4A2	Amoebiasis
5146	100157641	ssc-miR-92b-5p	PLCB2	Amoebiasis
5146	396974	ssc-miR-92b-5p	VCL	Amoebiasis
5146	100516581	ssc-let-7a	LOC100516581	Amoebiasis
5146	733632	ssc-let-7a	LOC733632	Amoebiasis
5146	396974	ssc-miR-34c	VCL	Amoebiasis
5146	100511937	ssc-miR-202-5p_1ss16TC	PIK3R3	Amoebiasis
5146	100519286	ssc-miR-202-5p_1ss16TC	SERPINB2	Amoebiasis
5146	397076	ssc-miR-202-5p_1ss16TC	IL12B	Amoebiasis
5146	397106	ssc-miR-202-5p_1ss16TC	IL10	Amoebiasis
5146	100516581	ssc-miR-142-3p	LOC100516581	Amoebiasis
5146	397244	ssc-miR-142-3p	CASP3	Amoebiasis
5146	100518537	ssc-miR-20b	GNA15	Amoebiasis
5146	396991	bta-miR-660_1ss20CT	IFNG	Amoebiasis
5146	100153454	ssc-miR-186	COL4A2	Amoebiasis
5146	100157641	ssc-miR-186	PLCB2	Amoebiasis
5146	100514498	ssc-miR-186	LOC100514498	Amoebiasis
5146	396880	ssc-miR-186	IL8	Amoebiasis
5146	397244	ssc-miR-186	CASP3	Amoebiasis
5146	100153454	ssc-miR-29a_L-1R-1	COL4A2	Amoebiasis
5146	100154420	ssc-miR-29a_L-1R-1	LAMA2	Amoebiasis
5146	100157406	ssc-miR-29a_L-1R-1	ACTN2	Amoebiasis
5146	100511937	ssc-miR-29a_L-1R-1	PIK3R3	Amoebiasis
5146	100514498	ssc-miR-29a_L-1R-1	LOC100514498	Amoebiasis
5146	396974	ssc-miR-29a_L-1R-1	VCL	Amoebiasis
5146	397175	ssc-miR-29a_L-1R-1	COLL11A1	Amoebiasis
5146	397531	ssc-miR-29a_L-1R-1	COL5A3	Amoebiasis
5146	733632	ssc-miR-29a_L-1R-1	LOC733632	Amoebiasis
5146	100155893	ssc-miR-628	ARG2	Amoebiasis
5146	397076	ssc-miR-628	IL12B	Amoebiasis
5146	397400	ssc-miR-628	TGFB3	Amoebiasis
5146	100154581	eca-miR-500	LAMA4	Amoebiasis
5146	733632	eca-miR-500	LOC733632	Amoebiasis
5146	100511937	ssc-mir-4339-p3_1ss22GT	PIK3R3	Amoebiasis
5146	397400	ssc-mir-4339-p3_1ss22GT	TGFB3	Amoebiasis
5146	397531	ssc-mir-4339-p3_1ss22GT	COL5A3	Amoebiasis
5146	100157641	ssc-miR-423-5p	PLCB2	Amoebiasis
5146	100518537	ssc-miR-423-5p	GNA15	Amoebiasis
5146	100525148	ssc-miR-423-5p	PLCB3	Amoebiasis
5146	397652	ssc-miR-423-5p	PRKACA	Amoebiasis
5146	397620	eca-miR-338-5p_R-1	FN1	Amoebiasis
5146	399541	eca-miR-338-5p_R-1	TLR4	Amoebiasis
5146	100135665	ssc-miR-185	RELA	Amoebiasis
5146	100157641	ssc-miR-185	PLCB2	Amoebiasis
5146	100511937	ssc-miR-185	PIK3R3	Amoebiasis
5146	100525148	ssc-miR-185	PLCB3	Amoebiasis
5146	397175	ssc-miR-185	COLL11A1	Amoebiasis
5146	397531	ssc-miR-185	COL5A3	Amoebiasis
5146	399541	ssc-miR-185	TLR4	Amoebiasis
5146	100154420	ssc-miR-769-3p_L-1	LAMA2	Amoebiasis
5146	396974	eca-miR-590-5p	VCL	Amoebiasis
5146	397053	eca-miR-590-5p	IL12A	Amoebiasis
5146	100518537	ssc-miR-193a-3p	GNA15	Amoebiasis
5146	396623	ssc-miR-193a-3p	TLR2	Amoebiasis
5146	100157641	ssc-miR-135	PLCB2	Amoebiasis
5146	733632	ssc-let-7g	LOC733632	Amoebiasis
5146	100157406	ssc-miR-345-5p_R+1	ACTN2	Amoebiasis
5146	100514498	ssc-miR-345-5p_R+1	LOC100514498	Amoebiasis
5146	397078	ssc-miR-345-5p_R+1	TGFB1	Amoebiasis
5146	100037954	ssc-miR-499-5p	C8B	Amoebiasis
5146	100523862	ssc-miR-499-5p	RAB5C	Amoebiasis
5146	397053	ssc-miR-30d	IL12A	Amoebiasis
5146	397076	ssc-miR-30d	IL12B	Amoebiasis
5146	399541	ssc-miR-30d	TLR4	Amoebiasis
5146	397532	ssc-miR-885-5p	COL5A2	Amoebiasis
5146	399541	ssc-miR-885-5p	TLR4	Amoebiasis
5146	100155893	ssc-miR-338_R+1	ARG2	Amoebiasis
5146	100157406	ssc-miR-338_R+1	ACTN2	Amoebiasis
5146	396623	ssc-miR-338_R+1	TLR2	Amoebiasis
5146	399541	ssc-miR-338_R+1	TLR4	Amoebiasis
5146	100157641	hsa-mir-6087-p3	PLCB2	Amoebiasis
5146	399541	cgr-miR-19b-5p	TLR4	Amoebiasis
5146	100155893	ssc-miR-26a	ARG2	Amoebiasis
5146	100157406	ssc-miR-26a	ACTN2	Amoebiasis
5146	100523862	ssc-miR-26a	RAB5C	Amoebiasis
5146	396859	ssc-miR-26a	NOS2	Amoebiasis
5146	733632	ssc-miR-26a	LOC733632	Amoebiasis
5146	100037954	bta-miR-2404_R+8	C8B	Amoebiasis
5146	100513489	bta-miR-2404_R+8	LOC100513489	Amoebiasis
5146	399541	bta-miR-2404_R+8	TLR4	Amoebiasis
5146	100157406	ssc-mir-4338-p3	ACTN2	Amoebiasis
5146	100519286	ssc-mir-4338-p3	SERPINB2	Amoebiasis
5146	399541	ssc-mir-4338-p3	TLR4	Amoebiasis
5146	100155893	ssc-miR-18a_R+1	ARG2	Amoebiasis
5146	100523862	ssc-miR-18a_R+1	RAB5C	Amoebiasis
5146	100157406	ssc-miR-490-3p_R+1	ACTN2	Amoebiasis
5146	100135665	hsa-miR-103a-2-5p	RELA	Amoebiasis
5146	100511937	hsa-miR-103a-2-5p	PIK3R3	Amoebiasis
5146	100514498	hsa-miR-103a-2-5p	LOC100514498	Amoebiasis
5146	396880	hsa-miR-103a-2-5p	IL8	Amoebiasis
5146	397076	hsa-miR-103a-2-5p	IL12B	Amoebiasis
5146	399541	hsa-miR-103a-2-5p	TLR4	Amoebiasis
5146	733632	hsa-miR-103a-2-5p	LOC733632	Amoebiasis
5146	100525148	ssc-miR-1296-5p	PLCB3	Amoebiasis
5146	397078	ssc-miR-1296-5p	TGFB1	Amoebiasis
5146	397076	ssc-miR-181a_R-1	IL12B	Amoebiasis
5146	397086	ssc-miR-181a_R-1	TNF	Amoebiasis
5146	399541	bta-miR-677_R+4_1ss13CT	TLR4	Amoebiasis
5146	100511937	ssc-miR-19b	PIK3R3	Amoebiasis
5146	733632	ssc-miR-19b	LOC733632	Amoebiasis
5146	100153454	ssc-miR-29c_R-1	COL4A2	Amoebiasis
5146	100154420	ssc-miR-29c_R-1	LAMA2	Amoebiasis
5146	100511937	ssc-miR-29c_R-1	PIK3R3	Amoebiasis
5146	100514498	ssc-miR-29c_R-1	LOC100514498	Amoebiasis
5146	396974	ssc-miR-29c_R-1	VCL	Amoebiasis
5146	397175	ssc-miR-29c_R-1	COLL11A1	Amoebiasis
5146	397531	ssc-miR-29c_R-1	COL5A3	Amoebiasis
5146	733632	ssc-miR-29c_R-1	LOC733632	Amoebiasis
5146	399541	sha-mir-716a-p3_1ss5TC	TLR4	Amoebiasis
5146	733632	sha-mir-716a-p3_1ss5TC	LOC733632	Amoebiasis
5146	100048958	ssc-miR-193a-5p	GNA14	Amoebiasis
5146	100157641	ssc-miR-193a-5p	PLCB2	Amoebiasis
5146	396974	ssc-miR-193a-5p	VCL	Amoebiasis
5146	100135665	ssc-miR-1306-5p	RELA	Amoebiasis
5146	100514498	ssc-miR-1306-5p	LOC100514498	Amoebiasis
5146	396851	ssc-miR-1306-5p	PIK3R5	Amoebiasis
5146	397078	ssc-miR-1306-5p	TGFB1	Amoebiasis
5146	397106	bta-miR-200c	IL10	Amoebiasis
5146	397531	bta-miR-200c	COL5A3	Amoebiasis
5146	397620	bta-miR-200c	FN1	Amoebiasis
5146	733632	ssc-miR-92b-3p	LOC733632	Amoebiasis
5146	100155893	ssc-miR-151-5p	ARG2	Amoebiasis
5146	397400	ssc-miR-151-5p	TGFB3	Amoebiasis
5146	100514498	ssc-miR-107_R-2	LOC100514498	Amoebiasis
5146	396974	ssc-miR-107_R-2	VCL	Amoebiasis
5146	100154420	ssc-miR-190a_R+2	LAMA2	Amoebiasis
5146	100135665	ssc-miR-365-3p	RELA	Amoebiasis
5146	100155893	ssc-miR-365-3p	ARG2	Amoebiasis
5146	100511937	ssc-miR-365-3p	PIK3R3	Amoebiasis
5146	100514975	ssc-miR-365-3p	LOC100514975	Amoebiasis
5146	100516581	ssc-miR-365-3p	LOC100516581	Amoebiasis
5146	397400	ssc-miR-365-3p	TGFB3	Amoebiasis
5146	100037955	ssc-miR-1307_R+1	LOC100037955	Amoebiasis
5146	100157406	mmu-miR-1983	ACTN2	Amoebiasis
5146	100518537	mmu-miR-1983	GNA15	Amoebiasis
5146	100154581	ssc-miR-148b-3p	LAMA4	Amoebiasis
5146	100511937	ssc-miR-148b-3p	PIK3R3	Amoebiasis
5146	396707	ssc-miR-615	LAMB1	Amoebiasis
5146	397076	hsa-miR-183-3p_L-1R+1	IL12B	Amoebiasis
5146	100513489	bta-miR-340	LOC100513489	Amoebiasis
5146	397400	bta-miR-340	TGFB3	Amoebiasis
5146	100514975	mmu-mir-5105-p5	LOC100514975	Amoebiasis
5146	397076	eca-miR-590-3p	IL12B	Amoebiasis
5146	100522792	bta-miR-188_R-4	LOC100522792	Amoebiasis
5146	100157406	ssc-miR-101_R+1	ACTN2	Amoebiasis
5146	396974	ssc-miR-101_R+1	VCL	Amoebiasis
5146	100157641	hsa-miR-185-3p_R-1	PLCB2	Amoebiasis
5146	100518537	hsa-miR-185-3p_R-1	GNA15	Amoebiasis
5146	100523862	hsa-miR-185-3p_R-1	RAB5C	Amoebiasis
5146	100525148	hsa-miR-185-3p_R-1	PLCB3	Amoebiasis
5146	396851	hsa-miR-185-3p_R-1	PIK3R5	Amoebiasis
5146	396880	hsa-miR-185-3p_R-1	IL8	Amoebiasis
5146	397086	hsa-miR-185-3p_R-1	TNF	Amoebiasis
5146	100153454	ssc-miR-136_R-1	COL4A2	Amoebiasis
5146	100514498	ssc-miR-136_R-1	LOC100514498	Amoebiasis
5146	100514975	ssc-miR-136_R-1	LOC100514975	Amoebiasis
5146	399541	oar-miR-485-3p	TLR4	Amoebiasis
5146	397053	mmu-miR-30f_L+1R-1_1ss17AG	IL12A	Amoebiasis
5146	397076	mmu-miR-30f_L+1R-1_1ss17AG	IL12B	Amoebiasis
5146	100514498	ssc-mir-99b-p3	LOC100514498	Amoebiasis
5146	100516581	ssc-let-7c	LOC100516581	Amoebiasis
5146	733632	ssc-let-7c	LOC733632	Amoebiasis
5146	397053	ssc-miR-30e-5p	IL12A	Amoebiasis
5146	397076	ssc-miR-30e-5p	IL12B	Amoebiasis
5146	397244	ssc-miR-30e-5p	CASP3	Amoebiasis
5146	100513489	ssc-miR-125a_R-1	LOC100513489	Amoebiasis
5146	100525148	ssc-miR-125a_R-1	PLCB3	Amoebiasis
5146	397086	ssc-miR-125a_R-1	TNF	Amoebiasis
5146	397244	ssc-miR-125a_R-1	CASP3	Amoebiasis
5146	100157406	ssc-miR-1343	ACTN2	Amoebiasis
5146	100157641	ssc-miR-1343	PLCB2	Amoebiasis
5146	100511937	ssc-miR-1343	PIK3R3	Amoebiasis
5146	100513489	ssc-miR-1343	LOC100513489	Amoebiasis
5146	100514498	ssc-miR-1343	LOC100514498	Amoebiasis
5146	100518537	ssc-miR-1343	GNA15	Amoebiasis
5146	396974	ssc-miR-1343	VCL	Amoebiasis
5146	397244	ssc-miR-1343	CASP3	Amoebiasis
5146	396707	hsa-miR-200c-5p	LAMB1	Amoebiasis
5146	397076	hsa-miR-200c-5p	IL12B	Amoebiasis
5146	100153454	bta-mir-2887-2-p5	COL4A2	Amoebiasis
5146	100523862	rno-mir-3553-p5	RAB5C	Amoebiasis
5146	100514975	hsa-miR-26b-3p	LOC100514975	Amoebiasis
5146	396851	hsa-miR-26b-3p	PIK3R5	Amoebiasis
5146	397076	hsa-miR-26b-3p	IL12B	Amoebiasis
5146	397106	hsa-miR-26b-3p	IL10	Amoebiasis
5146	399541	ssc-miR-126-5p	TLR4	Amoebiasis
5146	100511937	ssc-miR-769-5p_R+1	PIK3R3	Amoebiasis
5146	100513489	ssc-miR-769-5p_R+1	LOC100513489	Amoebiasis
5146	100037953	eca-miR-507_L+2R-1_1ss16AT	C8A	Amoebiasis
5146	397175	eca-miR-507_L+2R-1_1ss16AT	COLL11A1	Amoebiasis
5146	396974	ssc-miR-140-5p_L+1	VCL	Amoebiasis
5146	399541	ssc-miR-140-5p_L+1	TLR4	Amoebiasis
5146	397053	ssc-miR-30a-5p_R+2	IL12A	Amoebiasis
5146	397076	ssc-miR-30a-5p_R+2	IL12B	Amoebiasis
5146	399541	ssc-miR-30a-5p_R+2	TLR4	Amoebiasis
5146	100155893	bta-miR-21-3p_L+1R-1	ARG2	Amoebiasis
5146	100522792	bta-miR-21-3p_L+1R-1	LOC100522792	Amoebiasis
5146	397652	bta-miR-21-3p_L+1R-1	PRKACA	Amoebiasis
5146	397106	bta-miR-200b_R+1	IL10	Amoebiasis
5146	397531	bta-miR-200b_R+1	COL5A3	Amoebiasis
5146	397620	bta-miR-200b_R+1	FN1	Amoebiasis
5146	396974	mmu-let-7a-2-3p_R+1	VCL	Amoebiasis
5146	397086	cgr-miR-29c-5p	TNF	Amoebiasis
5146	397652	ssc-miR-744	PRKACA	Amoebiasis
5146	100048958	ssc-miR-4334-3p	GNA14	Amoebiasis
5146	100135665	ssc-miR-4334-3p	RELA	Amoebiasis
5146	100157406	ssc-miR-4334-3p	ACTN2	Amoebiasis
5146	100513489	ssc-miR-4334-3p	LOC100513489	Amoebiasis
5146	396851	ssc-miR-4334-3p	PIK3R5	Amoebiasis
5146	399541	ssc-miR-4334-3p	TLR4	Amoebiasis
5146	100514498	mmu-mir-1983-p5_1ss1GA	LOC100514498	Amoebiasis
5146	100525148	mmu-mir-1983-p5_1ss1GA	PLCB3	Amoebiasis
5146	397175	mmu-mir-1983-p5_1ss1GA	COLL11A1	Amoebiasis
5146	399541	mmu-mir-1983-p5_1ss1GA	TLR4	Amoebiasis
5146	100037954	ssc-miR-545-3p_R+1	C8B	Amoebiasis
5146	100155893	mmu-mir-5105-p3	ARG2	Amoebiasis
5146	396707	mmu-mir-5105-p3	LAMB1	Amoebiasis
5146	733632	ssc-miR-363_R-1	LOC733632	Amoebiasis
5146	100037954	hsa-miR-3065-5p	C8B	Amoebiasis
5146	100157641	hsa-miR-3065-5p	PLCB2	Amoebiasis
5146	100514498	hsa-miR-3065-5p	LOC100514498	Amoebiasis
5146	100518537	ssc-miR-106a_R-1_1ss1AC	GNA15	Amoebiasis
5146	100037954	ssc-miR-2320-5p_R+1	C8B	Amoebiasis
5146	100153454	ssc-miR-2320-5p_R+1	COL4A2	Amoebiasis
5146	100511937	ssc-miR-2320-5p_R+1	PIK3R3	Amoebiasis
5146	100514498	ssc-miR-2320-5p_R+1	LOC100514498	Amoebiasis
5146	100516581	ssc-miR-2320-5p_R+1	LOC100516581	Amoebiasis
5146	396851	ssc-miR-2320-5p_R+1	PIK3R5	Amoebiasis
5146	396974	ssc-miR-2320-5p_R+1	VCL	Amoebiasis
5146	397076	ssc-miR-2320-5p_R+1	IL12B	Amoebiasis
5146	397086	ssc-miR-2320-5p_R+1	TNF	Amoebiasis
5146	399541	ssc-miR-2320-5p_R+1	TLR4	Amoebiasis
5146	100153454	ssc-miR-29b	COL4A2	Amoebiasis
5146	100154420	ssc-miR-29b	LAMA2	Amoebiasis
5146	100157406	ssc-miR-29b	ACTN2	Amoebiasis
5146	100511937	ssc-miR-29b	PIK3R3	Amoebiasis
5146	100514498	ssc-miR-29b	LOC100514498	Amoebiasis
5146	396974	ssc-miR-29b	VCL	Amoebiasis
5146	397175	ssc-miR-29b	COLL11A1	Amoebiasis
5146	397531	ssc-miR-29b	COL5A3	Amoebiasis
5146	733632	ssc-miR-29b	LOC733632	Amoebiasis
5146	100155893	ssc-miR-339-3p	ARG2	Amoebiasis
5146	100513489	ssc-miR-339-3p	LOC100513489	Amoebiasis
5146	100514498	ssc-miR-339-3p	LOC100514498	Amoebiasis
5146	399541	ssc-miR-339-3p	TLR4	Amoebiasis
5146	100153454	eca-mir-1842-p3	COL4A2	Amoebiasis
5146	397620	eca-mir-1842-p3	FN1	Amoebiasis
5146	397086	ssc-miR-181c	TNF	Amoebiasis
5146	100514498	hsa-miR-127-5p	LOC100514498	Amoebiasis
5146	396880	hsa-miR-127-5p	IL8	Amoebiasis
5146	397244	hsa-miR-127-5p	CASP3	Amoebiasis
5146	397620	hsa-miR-127-5p	FN1	Amoebiasis
5146	399541	ssc-miR-320_R-1	TLR4	Amoebiasis
5146	100037953	ssc-miR-148b-5p	C8A	Amoebiasis
5146	100514498	ssc-miR-532-3p	LOC100514498	Amoebiasis
5146	397652	ssc-miR-532-3p	PRKACA	Amoebiasis
5146	399541	ssc-miR-532-3p	TLR4	Amoebiasis
5146	100037954	ssc-miR-331-3p_R-1	C8B	Amoebiasis
5146	397086	ssc-miR-331-3p_R-1	TNF	Amoebiasis
5146	100037953	ssc-mir-29b-2-p5	C8A	Amoebiasis
5146	100511937	ssc-mir-29b-2-p5	PIK3R3	Amoebiasis
5146	100516581	ssc-mir-29b-2-p5	LOC100516581	Amoebiasis
5146	100135665	ssc-miR-149	RELA	Amoebiasis
5146	100511937	ssc-miR-149	PIK3R3	Amoebiasis
5146	397078	ssc-miR-361-5p	TGFB1	Amoebiasis
5146	100135665	hsa-miR-574-5p	RELA	Amoebiasis
5146	100037938	ssc-mir-4332-p5_1ss19CA	CD14	Amoebiasis
5146	100135665	ssc-mir-4332-p5_1ss19CA	RELA	Amoebiasis
5146	100157641	ssc-mir-4332-p5_1ss19CA	PLCB2	Amoebiasis
5146	100514498	ssc-mir-4332-p5_1ss19CA	LOC100514498	Amoebiasis
5146	100518537	ssc-mir-4332-p5_1ss19CA	GNA15	Amoebiasis
5146	100523862	ssc-mir-4332-p5_1ss19CA	RAB5C	Amoebiasis
5146	396851	ssc-mir-4332-p5_1ss19CA	PIK3R5	Amoebiasis
5146	397076	ssc-mir-4332-p5_1ss19CA	IL12B	Amoebiasis
5146	397532	ssc-mir-4332-p5_1ss19CA	COL5A2	Amoebiasis
5146	100155893	ssc-miR-324	ARG2	Amoebiasis
5146	100518537	ssc-miR-324	GNA15	Amoebiasis
5146	397244	ssc-mir-1285-p5	CASP3	Amoebiasis
5146	100516581	ssc-let-7f	LOC100516581	Amoebiasis
5146	733632	ssc-let-7f	LOC733632	Amoebiasis
5146	733632	ssc-miR-92a	LOC733632	Amoebiasis
5146	100514498	hsa-miR-186-3p_L-1R+1	LOC100514498	Amoebiasis
5146	397531	hsa-miR-186-3p_L-1R+1	COL5A3	Amoebiasis
5146	100514498	ssc-miR-491	LOC100514498	Amoebiasis
5146	397076	ssc-miR-491	IL12B	Amoebiasis
5146	397532	ssc-miR-491	COL5A2	Amoebiasis
5146	100514498	ssc-miR-381	LOC100514498	Amoebiasis
5146	100135665	eca-miR-1842_1ss9TC	RELA	Amoebiasis
5146	100157641	eca-miR-1842_1ss9TC	PLCB2	Amoebiasis
5146	100514975	ssc-mir-4331-p3	LOC100514975	Amoebiasis
5146	100516581	ssc-mir-4331-p3	LOC100516581	Amoebiasis
5146	399541	ssc-mir-4331-p3	TLR4	Amoebiasis
5146	397244	ssc-miR-425-5p	CASP3	Amoebiasis
5146	100519286	mmu-miR-20a-3p_R+1_1ss10CT	SERPINB2	Amoebiasis
5146	100155893	cfa-miR-200b	ARG2	Amoebiasis
5146	100155893	cfa-miR-505_R+1	ARG2	Amoebiasis
5146	100157641	cfa-miR-505_R+1	PLCB2	Amoebiasis
5146	100513489	cfa-miR-505_R+1	LOC100513489	Amoebiasis
5146	100518537	cfa-miR-505_R+1	GNA15	Amoebiasis
5146	396851	cfa-miR-505_R+1	PIK3R5	Amoebiasis
5146	396880	cfa-miR-505_R+1	IL8	Amoebiasis
5146	100514498	bta-miR-99a-3p_R+4	LOC100514498	Amoebiasis
5146	100514498	ssc-miR-497	LOC100514498	Amoebiasis
5146	100514975	ssc-miR-497	LOC100514975	Amoebiasis
5146	396974	ssc-miR-497	VCL	Amoebiasis
5146	100155893	ssc-miR-139-5p_R+1	ARG2	Amoebiasis
5146	397086	ssc-miR-139-5p_R+1	TNF	Amoebiasis
5146	397244	ssc-miR-139-5p_R+1	CASP3	Amoebiasis
5146	397400	ssc-miR-139-5p_R+1	TGFB3	Amoebiasis
5146	100155893	bta-mir-2404-1-p3_1ss20CG	ARG2	Amoebiasis
5146	100514975	bta-mir-2404-1-p3_1ss20CG	LOC100514975	Amoebiasis
5146	100516581	bta-mir-2404-1-p3_1ss20CG	LOC100516581	Amoebiasis
5146	397053	bta-mir-2404-1-p3_1ss20CG	IL12A	Amoebiasis
5146	399541	bta-mir-2404-1-p3_1ss20CG	TLR4	Amoebiasis
5146	733632	ssc-let-7e	LOC733632	Amoebiasis
5146	100157641	hsa-mir-6087-p5_1ss13TC	PLCB2	Amoebiasis
5146	100525148	hsa-mir-6087-p5_1ss13TC	PLCB3	Amoebiasis
5146	100155893	ssc-miR-296-3p_R+1	ARG2	Amoebiasis
5146	396623	ssc-miR-296-3p_R+1	TLR2	Amoebiasis
5146	397175	ssc-miR-296-3p_R+1	COLL11A1	Amoebiasis
5146	397531	ssc-miR-296-3p_R+1	COL5A3	Amoebiasis
5146	399541	ssc-miR-296-3p_R+1	TLR4	Amoebiasis
5146	396974	ssc-miR-30b-3p_R+1	VCL	Amoebiasis
5146	397106	ssc-miR-30b-3p_R+1	IL10	Amoebiasis
5146	397106	ssc-miR-429	IL10	Amoebiasis
5146	100511937	ssc-miR-31	PIK3R3	Amoebiasis
5146	396974	ssc-miR-31	VCL	Amoebiasis
5146	100037954	ssc-miR-138	C8B	Amoebiasis
5146	100135665	ssc-miR-138	RELA	Amoebiasis
5146	100153454	ssc-miR-138	COL4A2	Amoebiasis
5146	100514975	ssc-miR-138	LOC100514975	Amoebiasis
5146	397652	ssc-miR-138	PRKACA	Amoebiasis
5146	100514975	ssc-miR-1271_L+2R-2	LOC100514975	Amoebiasis
5146	397078	ssc-miR-1271_L+2R-2	TGFB1	Amoebiasis
5146	397086	ssc-miR-1271_L+2R-2	TNF	Amoebiasis
5146	396974	ssc-miR-21_R+1	VCL	Amoebiasis
5146	397053	ssc-miR-21_R+1	IL12A	Amoebiasis
5146	100514498	hsa-miR-378a-5p	LOC100514498	Amoebiasis
5146	396974	hsa-miR-378a-5p	VCL	Amoebiasis
5146	399541	hsa-miR-378a-5p	TLR4	Amoebiasis
5146	100135665	cgr-miR-18a-3p	RELA	Amoebiasis
5146	100514975	cgr-miR-18a-3p	LOC100514975	Amoebiasis
5146	100525148	cgr-miR-18a-3p	PLCB3	Amoebiasis
5146	397400	cgr-miR-18a-3p	TGFB3	Amoebiasis
5146	399541	cgr-miR-18a-3p	TLR4	Amoebiasis
5146	100153454	ssc-miR-143-5p_R+1	COL4A2	Amoebiasis
5146	100514975	ssc-miR-143-5p_R+1	LOC100514975	Amoebiasis
5146	396880	ssc-miR-143-5p_R+1	IL8	Amoebiasis
5146	397175	ssc-miR-362_R-1	COLL11A1	Amoebiasis
5146	396974	bta-miR-34b_R+1	VCL	Amoebiasis
5146	397400	bta-miR-34b_R+1	TGFB3	Amoebiasis
5146	100516581	ssc-miR-98	LOC100516581	Amoebiasis
5146	733632	ssc-miR-98	LOC733632	Amoebiasis
5146	100154581	ssc-miR-152	LAMA4	Amoebiasis
5146	100511937	ssc-miR-152	PIK3R3	Amoebiasis
5146	100514498	bta-mir-2904-3-p3	LOC100514498	Amoebiasis
5146	100037954	ssc-miR-24-3p	C8B	Amoebiasis
5146	100155893	ssc-miR-24-3p	ARG2	Amoebiasis
5146	100518537	ssc-miR-24-3p	GNA15	Amoebiasis
5146	100523862	ssc-miR-24-3p	RAB5C	Amoebiasis
5146	399541	ssc-miR-24-3p	TLR4	Amoebiasis
5146	100518537	ssc-miR-423-3p	GNA15	Amoebiasis
5146	397106	ssc-miR-423-3p	IL10	Amoebiasis
5146	100511937	ssc-miR-7	PIK3R3	Amoebiasis
5146	100153454	bta-miR-2904_L+3R+3	COL4A2	Amoebiasis
5146	100157641	bta-miR-2904_L+3R+3	PLCB2	Amoebiasis
5146	100523862	bta-miR-2904_L+3R+3	RAB5C	Amoebiasis
5146	100518537	ssc-miR-17-5p	GNA15	Amoebiasis
5146	100157641	ssc-miR-140-3p_R-1	PLCB2	Amoebiasis
5146	397078	ssc-miR-140-3p_R-1	TGFB1	Amoebiasis
5146	396974	ssc-miR-542-5p_R+2	VCL	Amoebiasis
5146	100157406	bta-miR-26b	ACTN2	Amoebiasis
5146	100523862	bta-miR-26b	RAB5C	Amoebiasis
5146	396859	bta-miR-26b	NOS2	Amoebiasis
5146	733632	bta-miR-26b	LOC733632	Amoebiasis
5146	397532	cfa-miR-33a_R+1	COL5A2	Amoebiasis
5146	399541	cfa-miR-33a_R+1	TLR4	Amoebiasis
5146	397175	ssc-miR-345-3p_L-1R+1	COLL11A1	Amoebiasis
5146	100157641	bta-miR-346	PLCB2	Amoebiasis
5146	100513489	bta-miR-346	LOC100513489	Amoebiasis
5146	396974	bta-miR-346	VCL	Amoebiasis
5146	100155893	ssc-miR-340	ARG2	Amoebiasis
5146	100155893	cgr-miR-29a-5p_R-2	ARG2	Amoebiasis
5146	100511937	cgr-miR-29a-5p_R-2	PIK3R3	Amoebiasis
5146	100514975	cgr-miR-29a-5p_R-2	LOC100514975	Amoebiasis
5146	397086	cgr-miR-29a-5p_R-2	TNF	Amoebiasis
5146	399541	cgr-miR-29a-5p_R-2	TLR4	Amoebiasis
5146	100516581	ssc-miR-17-3p_R+1	LOC100516581	Amoebiasis
5146	397106	ssc-miR-17-3p_R+1	IL10	Amoebiasis
5146	399541	ssc-miR-17-3p_R+1	TLR4	Amoebiasis
5146	100153454	ssc-miR-493-3p	COL4A2	Amoebiasis
5146	399541	ssc-miR-493-3p	TLR4	Amoebiasis
5146	100511937	bta-mir-6529-p3	PIK3R3	Amoebiasis
5146	100514975	bta-mir-6529-p3	LOC100514975	Amoebiasis
5146	100516581	bta-mir-6529-p3	LOC100516581	Amoebiasis
5146	100518537	bta-mir-6529-p3	GNA15	Amoebiasis
5146	399541	bta-mir-6529-p3	TLR4	Amoebiasis
5146	100511937	ssc-miR-19a	PIK3R3	Amoebiasis
5146	733632	ssc-miR-19a	LOC733632	Amoebiasis
5146	100037954	hsa-miR-191-3p_R-1_2ss6GA19CT	C8B	Amoebiasis
5146	100518537	hsa-miR-191-3p_R-1_2ss6GA19CT	GNA15	Amoebiasis
5146	396974	ssc-miR-671-5p	VCL	Amoebiasis
5146	397086	ssc-miR-671-5p	TNF	Amoebiasis
5146	397106	ssc-miR-671-5p	IL10	Amoebiasis
5146	100514498	ssc-miR-15a_R+3	LOC100514498	Amoebiasis
5146	100514975	ssc-miR-15a_R+3	LOC100514975	Amoebiasis
5146	396974	ssc-miR-15a_R+3	VCL	Amoebiasis
5146	100514498	eca-miR-324-3p_L-2R+1	LOC100514498	Amoebiasis
5146	100523862	eca-miR-324-3p_L-2R+1	RAB5C	Amoebiasis
5146	100525148	eca-miR-324-3p_L-2R+1	PLCB3	Amoebiasis
5146	397175	eca-miR-324-3p_L-2R+1	COLL11A1	Amoebiasis
5146	100048958	ssc-miR-425-3p_L+1R-1	GNA14	Amoebiasis
5146	397175	ssc-miR-425-3p_L+1R-1	COLL11A1	Amoebiasis
5146	100518537	ssc-mir-4332-p3	GNA15	Amoebiasis
5146	397053	ssc-miR-30c-5p_R+1	IL12A	Amoebiasis
5146	397244	ssc-miR-30c-5p_R+1	CASP3	Amoebiasis
5146	396851	ssc-miR-551a_R+1	PIK3R5	Amoebiasis
5146	399541	sha-mir-716a-p5_1ss11TC	TLR4	Amoebiasis
5146	100514498	ssc-mir-1285-p3_1ss22TA	LOC100514498	Amoebiasis
5146	397078	ssc-miR-885-3p	TGFB1	Amoebiasis
5146	100514975	oar-miR-377-5p_1ss11TC	LOC100514975	Amoebiasis
5146	396707	oar-miR-377-5p_1ss11TC	LAMB1	Amoebiasis
5146	397076	ssc-miR-181b_R-1	IL12B	Amoebiasis
5146	397086	ssc-miR-181b_R-1	TNF	Amoebiasis
5146	100135665	ssc-miR-326_R+1	RELA	Amoebiasis
5146	397531	ssc-miR-326_R+1	COL5A3	Amoebiasis
5146	397652	ssc-miR-326_R+1	PRKACA	Amoebiasis
4144	100157936	ssc-miR-339	LOC100157936	Endocytosis
4144	100513842	ssc-miR-339	ADRBK1	Endocytosis
4144	100520250	ssc-miR-339	AP2A1	Endocytosis
4144	100523962	ssc-miR-339	LOC100523962	Endocytosis
4144	100153403	ssc-miR-103	EEA1	Endocytosis
4144	100154471	ssc-miR-103	NTRK1	Endocytosis
4144	100155580	ssc-miR-103	LOC100155580	Endocytosis
4144	100153403	ssc-let-7a	EEA1	Endocytosis
4144	100524645	ssc-let-7a	RAB11FIP4	Endocytosis
4144	396665	ssc-let-7a	TGFBR1	Endocytosis
4144	100153403	ssc-miR-34c	EEA1	Endocytosis
4144	100154662	ssc-miR-34c	LOC100154662	Endocytosis
4144	100519354	ssc-miR-34c	RUFY1	Endocytosis
4144	397062	ssc-miR-34c	TFRC	Endocytosis
4144	100152937	cgr-let-7i_R+1	GRK5	Endocytosis
4144	100155445	ssc-miR-202-5p_1ss16TC	LOC100155445	Endocytosis
4144	100513035	ssc-miR-202-5p_1ss16TC	CHMP5	Endocytosis
4144	100516729	ssc-miR-202-5p_1ss16TC	STAMBP	Endocytosis
4144	100125375	ssc-miR-20b	CAV2	Endocytosis
4144	100125967	ssc-miR-20b	LDLRAP1	Endocytosis
4144	100154192	ssc-miR-20b	LOC100154192	Endocytosis
4144	100154457	ssc-miR-20b	TM2D2	Endocytosis
4144	100517164	ssc-miR-20b	ZFYVE9	Endocytosis
4144	100520058	ssc-miR-20b	IQSEC2	Endocytosis
4144	100521564	ssc-miR-20b	ARAP2	Endocytosis
4144	100524238	ssc-miR-20b	LOC100524238	Endocytosis
4144	100513326	bta-miR-660_1ss20CT	SMAP1	Endocytosis
4144	100517164	bta-miR-660_1ss20CT	ZFYVE9	Endocytosis
4144	100155445	ssc-miR-186	LOC100155445	Endocytosis
4144	100521564	ssc-miR-186	ARAP2	Endocytosis
4144	100522530	ssc-miR-186	SH3KBP1	Endocytosis
4144	397062	ssc-miR-186	TFRC	Endocytosis
4144	397311	ssc-miR-186	KDR	Endocytosis
4144	780428	ssc-miR-186	CDC42	Endocytosis
4144	100125375	ssc-miR-29a_L-1R-1	CAV2	Endocytosis
4144	100513035	ssc-miR-29a_L-1R-1	CHMP5	Endocytosis
4144	100513172	ssc-miR-29a_L-1R-1	VPS36	Endocytosis
4144	100513326	ssc-miR-29a_L-1R-1	SMAP1	Endocytosis
4144	100516729	ssc-miR-29a_L-1R-1	STAMBP	Endocytosis
4144	100518076	ssc-miR-29a_L-1R-1	EPS15	Endocytosis
4144	780428	ssc-miR-29a_L-1R-1	CDC42	Endocytosis
4144	100518076	ssc-miR-628	EPS15	Endocytosis
4144	397400	ssc-miR-628	TGFB3	Endocytosis
4144	100125375	eca-miR-500	CAV2	Endocytosis
4144	100135037	eca-miR-500	SLA-6	Endocytosis
4144	100152937	eca-miR-500	GRK5	Endocytosis
4144	100518076	eca-miR-500	EPS15	Endocytosis
4144	100154662	ssc-mir-4339-p3_1ss22GT	LOC100154662	Endocytosis
4144	100157936	ssc-mir-4339-p3_1ss22GT	LOC100157936	Endocytosis
4144	100512857	ssc-mir-4339-p3_1ss22GT	LOC100512857	Endocytosis
4144	100513172	ssc-mir-4339-p3_1ss22GT	VPS36	Endocytosis
4144	100519354	ssc-mir-4339-p3_1ss22GT	RUFY1	Endocytosis
4144	100520058	ssc-mir-4339-p3_1ss22GT	IQSEC2	Endocytosis
4144	100520250	ssc-mir-4339-p3_1ss22GT	AP2A1	Endocytosis
4144	397260	ssc-mir-4339-p3_1ss22GT	SMAD3	Endocytosis
4144	397400	ssc-mir-4339-p3_1ss22GT	TGFB3	Endocytosis
4144	100145888	ssc-miR-423-5p	SMAP2	Endocytosis
4144	100154192	ssc-miR-423-5p	LOC100154192	Endocytosis
4144	100154662	ssc-miR-423-5p	LOC100154662	Endocytosis
4144	100156344	ssc-miR-423-5p	SH3GLB2	Endocytosis
4144	100511767	ssc-miR-423-5p	ARAP1	Endocytosis
4144	100513326	ssc-miR-423-5p	SMAP1	Endocytosis
4144	100513782	ssc-miR-423-5p	RAB11B	Endocytosis
4144	100513842	ssc-miR-423-5p	ADRBK1	Endocytosis
4144	100523947	ssc-miR-423-5p	LOC100523947	Endocytosis
4144	100524443	ssc-miR-423-5p	ACAP3	Endocytosis
4144	414900	ssc-miR-423-5p	PLD2	Endocytosis
4144	780428	ssc-miR-423-5p	CDC42	Endocytosis
4144	100513350	eca-miR-338-5p_R-1	LOC100513350	Endocytosis
4144	100516044	eca-miR-338-5p_R-1	CHMP2B	Endocytosis
4144	100523962	eca-miR-338-5p_R-1	LOC100523962	Endocytosis
4144	100038019	ssc-miR-185	LOC100038019	Endocytosis
4144	100145888	ssc-miR-185	SMAP2	Endocytosis
4144	100153403	ssc-miR-185	EEA1	Endocytosis
4144	100154192	ssc-miR-185	LOC100154192	Endocytosis
4144	100155445	ssc-miR-185	LOC100155445	Endocytosis
4144	100155580	ssc-miR-185	LOC100155580	Endocytosis
4144	100511767	ssc-miR-185	ARAP1	Endocytosis
4144	100518076	ssc-miR-185	EPS15	Endocytosis
4144	396659	ssc-miR-185	CXCR4	Endocytosis
4144	397114	ssc-miR-185	GRK7	Endocytosis
4144	397260	ssc-miR-185	SMAD3	Endocytosis
4144	780428	ssc-miR-185	CDC42	Endocytosis
4144	100037293	ssc-miR-769-3p_L-1	SLA-1	Endocytosis
4144	100519354	ssc-miR-769-3p_L-1	RUFY1	Endocytosis
4144	100522530	ssc-miR-769-3p_L-1	SH3KBP1	Endocytosis
4144	414900	hsa-miR-181a-3p	PLD2	Endocytosis
4144	100153403	eca-miR-590-5p	EEA1	Endocytosis
4144	100154662	eca-miR-590-5p	LOC100154662	Endocytosis
4144	100524238	eca-miR-590-5p	LOC100524238	Endocytosis
4144	100513350	ssc-miR-574	LOC100513350	Endocytosis
4144	100513782	ssc-miR-574	RAB11B	Endocytosis
4144	100157936	ssc-miR-193a-3p	LOC100157936	Endocytosis
4144	396810	ssc-miR-193a-3p	KIT	Endocytosis
4144	100155445	ssc-miR-135	LOC100155445	Endocytosis
4144	100516729	ssc-miR-135	STAMBP	Endocytosis
4144	100153403	ssc-let-7g	EEA1	Endocytosis
4144	100524645	ssc-let-7g	RAB11FIP4	Endocytosis
4144	396665	ssc-let-7g	TGFBR1	Endocytosis
4144	100152937	ssc-miR-345-5p_R+1	GRK5	Endocytosis
4144	100157936	ssc-miR-345-5p_R+1	LOC100157936	Endocytosis
4144	100523962	ssc-miR-345-5p_R+1	LOC100523962	Endocytosis
4144	396810	ssc-miR-345-5p_R+1	KIT	Endocytosis
4144	397062	ssc-miR-345-5p_R+1	TFRC	Endocytosis
4144	397078	ssc-miR-345-5p_R+1	TGFB1	Endocytosis
4144	100125375	ssc-miR-499-5p	CAV2	Endocytosis
4144	100522530	ssc-miR-499-5p	SH3KBP1	Endocytosis
4144	100523862	ssc-miR-499-5p	RAB5C	Endocytosis
4144	780428	ssc-miR-499-5p	CDC42	Endocytosis
4144	100152937	ssc-miR-30d	GRK5	Endocytosis
4144	100153403	ssc-miR-30d	EEA1	Endocytosis
4144	100155580	ssc-miR-30d	LOC100155580	Endocytosis
4144	100513326	ssc-miR-30d	SMAP1	Endocytosis
4144	100516729	ssc-miR-30d	STAMBP	Endocytosis
4144	100520250	ssc-miR-30d	AP2A1	Endocytosis
4144	397062	ssc-miR-30d	TFRC	Endocytosis
4144	100513122	ssc-miR-885-5p	VPS37A	Endocytosis
4144	396810	ssc-miR-885-5p	KIT	Endocytosis
4144	397062	ssc-miR-885-5p	TFRC	Endocytosis
4144	100513395	ssc-miR-338_R+1	ARFGAP2	Endocytosis
4144	396659	ssc-miR-338_R+1	CXCR4	Endocytosis
4144	396810	ssc-miR-338_R+1	KIT	Endocytosis
4144	397311	ssc-miR-338_R+1	KDR	Endocytosis
4144	100152937	hsa-mir-6087-p3	GRK5	Endocytosis
4144	100516729	hsa-mir-6087-p3	STAMBP	Endocytosis
4144	397114	hsa-mir-6087-p3	GRK7	Endocytosis
4144	397260	hsa-mir-6087-p3	SMAD3	Endocytosis
4144	100155580	cgr-miR-19b-5p	LOC100155580	Endocytosis
4144	100513326	cgr-miR-19b-5p	SMAP1	Endocytosis
4144	397062	cgr-miR-19b-5p	TFRC	Endocytosis
4144	100145888	ssc-miR-26a	SMAP2	Endocytosis
4144	100154192	ssc-miR-26a	LOC100154192	Endocytosis
4144	100513842	ssc-miR-26a	ADRBK1	Endocytosis
4144	100518076	ssc-miR-26a	EPS15	Endocytosis
4144	100523862	ssc-miR-26a	RAB5C	Endocytosis
4144	100153403	bta-miR-2404_R+8	EEA1	Endocytosis
4144	100154192	bta-miR-2404_R+8	LOC100154192	Endocytosis
4144	100516044	bta-miR-2404_R+8	CHMP2B	Endocytosis
4144	100523962	bta-miR-2404_R+8	LOC100523962	Endocytosis
4144	397260	bta-miR-2404_R+8	SMAD3	Endocytosis
4144	100152937	ssc-mir-4338-p3	GRK5	Endocytosis
4144	100513122	ssc-mir-4338-p3	VPS37A	Endocytosis
4144	100513172	ssc-mir-4338-p3	VPS36	Endocytosis
4144	100516044	ssc-mir-4338-p3	CHMP2B	Endocytosis
4144	100521564	ssc-mir-4338-p3	ARAP2	Endocytosis
4144	397260	ssc-mir-4338-p3	SMAD3	Endocytosis
4144	100145888	ssc-miR-18a_R+1	SMAP2	Endocytosis
4144	100154662	ssc-miR-18a_R+1	LOC100154662	Endocytosis
4144	100156344	ssc-miR-18a_R+1	SH3GLB2	Endocytosis
4144	100513172	ssc-miR-18a_R+1	VPS36	Endocytosis
4144	100522530	ssc-miR-18a_R+1	SH3KBP1	Endocytosis
4144	100523862	ssc-miR-18a_R+1	RAB5C	Endocytosis
4144	780428	ssc-miR-18a_R+1	CDC42	Endocytosis
4144	100038019	ssc-miR-490-3p_R+1	LOC100038019	Endocytosis
4144	100154192	ssc-miR-490-3p_R+1	LOC100154192	Endocytosis
4144	100154457	ssc-miR-490-3p_R+1	TM2D2	Endocytosis
4144	100511744	ssc-miR-490-3p_R+1	ARAP3	Endocytosis
4144	100516729	ssc-miR-490-3p_R+1	STAMBP	Endocytosis
4144	397260	ssc-miR-490-3p_R+1	SMAD3	Endocytosis
4144	100157936	hsa-miR-103a-2-5p	LOC100157936	Endocytosis
4144	100513172	hsa-miR-103a-2-5p	VPS36	Endocytosis
4144	100513326	hsa-miR-103a-2-5p	SMAP1	Endocytosis
4144	396810	hsa-miR-103a-2-5p	KIT	Endocytosis
4144	397311	hsa-miR-103a-2-5p	KDR	Endocytosis
4144	780428	hsa-miR-103a-2-5p	CDC42	Endocytosis
4144	100524645	bta-miR-375_L-1	RAB11FIP4	Endocytosis
4144	100125375	ssc-miR-20a_R+2	CAV2	Endocytosis
4144	100125967	ssc-miR-20a_R+2	LDLRAP1	Endocytosis
4144	100153403	ssc-miR-20a_R+2	EEA1	Endocytosis
4144	100154192	ssc-miR-20a_R+2	LOC100154192	Endocytosis
4144	100154457	ssc-miR-20a_R+2	TM2D2	Endocytosis
4144	100517164	ssc-miR-20a_R+2	ZFYVE9	Endocytosis
4144	100520058	ssc-miR-20a_R+2	IQSEC2	Endocytosis
4144	100521564	ssc-miR-20a_R+2	ARAP2	Endocytosis
4144	100524238	ssc-miR-20a_R+2	LOC100524238	Endocytosis
4144	100519354	ssc-miR-1296-5p	RUFY1	Endocytosis
4144	397078	ssc-miR-1296-5p	TGFB1	Endocytosis
4144	100513842	ssc-miR-181a_R-1	ADRBK1	Endocytosis
4144	100518076	ssc-miR-181a_R-1	EPS15	Endocytosis
4144	100521564	ssc-miR-181a_R-1	ARAP2	Endocytosis
4144	404693	ssc-miR-181a_R-1	CAV1	Endocytosis
4144	100125967	bta-miR-677_R+4_1ss13CT	LDLRAP1	Endocytosis
4144	100153403	bta-miR-677_R+4_1ss13CT	EEA1	Endocytosis
4144	100157660	bta-miR-677_R+4_1ss13CT	SH3GL3	Endocytosis
4144	100519354	bta-miR-677_R+4_1ss13CT	RUFY1	Endocytosis
4144	397062	bta-miR-677_R+4_1ss13CT	TFRC	Endocytosis
4144	397260	bta-miR-677_R+4_1ss13CT	SMAD3	Endocytosis
4144	404693	bta-miR-677_R+4_1ss13CT	CAV1	Endocytosis
4144	100037288	ssc-miR-19b	SLA-3	Endocytosis
4144	100154192	ssc-miR-19b	LOC100154192	Endocytosis
4144	100271929	ssc-miR-19b	CLTC	Endocytosis
4144	100513122	ssc-miR-19b	VPS37A	Endocytosis
4144	100522530	ssc-miR-19b	SH3KBP1	Endocytosis
4144	396648	ssc-miR-19b	HSP70.2	Endocytosis
4144	100125375	ssc-miR-29c_R-1	CAV2	Endocytosis
4144	100513035	ssc-miR-29c_R-1	CHMP5	Endocytosis
4144	100513172	ssc-miR-29c_R-1	VPS36	Endocytosis
4144	100513326	ssc-miR-29c_R-1	SMAP1	Endocytosis
4144	100516729	ssc-miR-29c_R-1	STAMBP	Endocytosis
4144	100518076	ssc-miR-29c_R-1	EPS15	Endocytosis
4144	780428	ssc-miR-29c_R-1	CDC42	Endocytosis
4144	100125375	sha-mir-716a-p3_1ss5TC	CAV2	Endocytosis
4144	100156344	sha-mir-716a-p3_1ss5TC	SH3GLB2	Endocytosis
4144	100513122	sha-mir-716a-p3_1ss5TC	VPS37A	Endocytosis
4144	100519354	sha-mir-716a-p3_1ss5TC	RUFY1	Endocytosis
4144	404693	sha-mir-716a-p3_1ss5TC	CAV1	Endocytosis
4144	780428	sha-mir-716a-p3_1ss5TC	CDC42	Endocytosis
4144	100152937	ssc-miR-193a-5p	GRK5	Endocytosis
4144	100155445	ssc-miR-193a-5p	LOC100155445	Endocytosis
4144	100513350	ssc-miR-193a-5p	LOC100513350	Endocytosis
4144	100037288	ssc-miR-1306-5p	SLA-3	Endocytosis
4144	100037293	ssc-miR-1306-5p	SLA-1	Endocytosis
4144	100511744	ssc-miR-1306-5p	ARAP3	Endocytosis
4144	397078	ssc-miR-1306-5p	TGFB1	Endocytosis
4144	397260	ssc-miR-1306-5p	SMAD3	Endocytosis
4144	100154662	bta-miR-200c	LOC100154662	Endocytosis
4144	100523947	bta-miR-200c	LOC100523947	Endocytosis
4144	397311	bta-miR-200c	KDR	Endocytosis
4144	100145888	ssc-miR-151-5p	SMAP2	Endocytosis
4144	100154192	ssc-miR-151-5p	LOC100154192	Endocytosis
4144	397400	ssc-miR-151-5p	TGFB3	Endocytosis
4144	414900	ssc-miR-151-5p	PLD2	Endocytosis
4144	100153403	ssc-miR-107_R-2	EEA1	Endocytosis
4144	100154471	ssc-miR-107_R-2	NTRK1	Endocytosis
4144	100155580	ssc-miR-107_R-2	LOC100155580	Endocytosis
4144	100524443	bta-mir-2887-2-p3_1ss24CT	ACAP3	Endocytosis
4144	100513350	ssc-miR-95_R-1	LOC100513350	Endocytosis
4144	100516729	ssc-miR-95_R-1	STAMBP	Endocytosis
4144	100513172	ssc-miR-190a_R+2	VPS36	Endocytosis
4144	100155580	ssc-miR-365-3p	LOC100155580	Endocytosis
4144	397400	ssc-miR-365-3p	TGFB3	Endocytosis
4144	100523962	ssc-miR-1307_R+1	LOC100523962	Endocytosis
4144	100125375	mmu-miR-1983	CAV2	Endocytosis
4144	100513350	mmu-miR-1983	LOC100513350	Endocytosis
4144	100522530	mmu-miR-1983	SH3KBP1	Endocytosis
4144	397114	mmu-miR-1983	GRK7	Endocytosis
4144	406190	mmu-miR-1983	DNAJC6	Endocytosis
4144	100125375	ssc-miR-148b-3p	CAV2	Endocytosis
4144	100513350	ssc-miR-148b-3p	LOC100513350	Endocytosis
4144	100518076	ssc-miR-148b-3p	EPS15	Endocytosis
4144	396810	ssc-miR-148b-3p	KIT	Endocytosis
4144	397260	ssc-miR-615	SMAD3	Endocytosis
4144	100511767	bta-miR-340	ARAP1	Endocytosis
4144	100524645	bta-miR-340	RAB11FIP4	Endocytosis
4144	397400	bta-miR-340	TGFB3	Endocytosis
4144	100135037	mmu-mir-5105-p5	SLA-6	Endocytosis
4144	100271929	mmu-mir-5105-p5	CLTC	Endocytosis
4144	100154457	eca-miR-590-3p	TM2D2	Endocytosis
4144	100516729	eca-miR-590-3p	STAMBP	Endocytosis
4144	100521564	eca-miR-590-3p	ARAP2	Endocytosis
4144	100524238	eca-miR-590-3p	LOC100524238	Endocytosis
4144	100154662	bta-miR-188_R-4	LOC100154662	Endocytosis
4144	100518076	bta-miR-188_R-4	EPS15	Endocytosis
4144	397260	bta-miR-188_R-4	SMAD3	Endocytosis
4144	397311	bta-miR-188_R-4	KDR	Endocytosis
4144	100513326	ssc-miR-101_R+1	SMAP1	Endocytosis
4144	100516729	ssc-miR-101_R+1	STAMBP	Endocytosis
4144	100518076	ssc-miR-101_R+1	EPS15	Endocytosis
4144	100125967	hsa-miR-185-3p_R-1	LDLRAP1	Endocytosis
4144	100154859	hsa-miR-185-3p_R-1	VPS28	Endocytosis
4144	100155580	hsa-miR-185-3p_R-1	LOC100155580	Endocytosis
4144	100511767	hsa-miR-185-3p_R-1	ARAP1	Endocytosis
4144	100512857	hsa-miR-185-3p_R-1	LOC100512857	Endocytosis
4144	100513350	hsa-miR-185-3p_R-1	LOC100513350	Endocytosis
4144	100513395	hsa-miR-185-3p_R-1	ARFGAP2	Endocytosis
4144	100513782	hsa-miR-185-3p_R-1	RAB11B	Endocytosis
4144	100513842	hsa-miR-185-3p_R-1	ADRBK1	Endocytosis
4144	100519354	hsa-miR-185-3p_R-1	RUFY1	Endocytosis
4144	100520058	hsa-miR-185-3p_R-1	IQSEC2	Endocytosis
4144	100523862	hsa-miR-185-3p_R-1	RAB5C	Endocytosis
4144	100524443	hsa-miR-185-3p_R-1	ACAP3	Endocytosis
4144	100524645	hsa-miR-185-3p_R-1	RAB11FIP4	Endocytosis
4144	414900	hsa-miR-185-3p_R-1	PLD2	Endocytosis
4144	100154662	ssc-miR-136_R-1	LOC100154662	Endocytosis
4144	100516729	ssc-miR-136_R-1	STAMBP	Endocytosis
4144	100518076	ssc-miR-136_R-1	EPS15	Endocytosis
4144	100522530	ssc-miR-136_R-1	SH3KBP1	Endocytosis
4144	396648	ssc-miR-136_R-1	HSP70.2	Endocytosis
4144	404693	ssc-miR-136_R-1	CAV1	Endocytosis
4144	100125375	oar-miR-485-3p	CAV2	Endocytosis
4144	100154662	oar-miR-485-3p	LOC100154662	Endocytosis
4144	100513172	oar-miR-485-3p	VPS36	Endocytosis
4144	100513326	oar-miR-485-3p	SMAP1	Endocytosis
4144	397260	oar-miR-485-3p	SMAD3	Endocytosis
4144	100152937	mmu-miR-30f_L+1R-1_1ss17AG	GRK5	Endocytosis
4144	100153403	mmu-miR-30f_L+1R-1_1ss17AG	EEA1	Endocytosis
4144	100155580	mmu-miR-30f_L+1R-1_1ss17AG	LOC100155580	Endocytosis
4144	100513326	mmu-miR-30f_L+1R-1_1ss17AG	SMAP1	Endocytosis
4144	100520250	mmu-miR-30f_L+1R-1_1ss17AG	AP2A1	Endocytosis
4144	100153403	ssc-let-7c	EEA1	Endocytosis
4144	100524645	ssc-let-7c	RAB11FIP4	Endocytosis
4144	396665	ssc-let-7c	TGFBR1	Endocytosis
4144	100152937	ssc-miR-30e-5p	GRK5	Endocytosis
4144	100153403	ssc-miR-30e-5p	EEA1	Endocytosis
4144	100154192	ssc-miR-30e-5p	LOC100154192	Endocytosis
4144	100155580	ssc-miR-30e-5p	LOC100155580	Endocytosis
4144	100513326	ssc-miR-30e-5p	SMAP1	Endocytosis
4144	100516729	ssc-miR-30e-5p	STAMBP	Endocytosis
4144	100520250	ssc-miR-30e-5p	AP2A1	Endocytosis
4144	100522530	ssc-miR-30e-5p	SH3KBP1	Endocytosis
4144	397062	ssc-miR-30e-5p	TFRC	Endocytosis
4144	100513172	ssc-miR-125a_R-1	VPS36	Endocytosis
4144	100513842	ssc-miR-125a_R-1	ADRBK1	Endocytosis
4144	100125967	ssc-miR-1343	LDLRAP1	Endocytosis
4144	100152937	ssc-miR-1343	GRK5	Endocytosis
4144	100155580	ssc-miR-1343	LOC100155580	Endocytosis
4144	100511767	ssc-miR-1343	ARAP1	Endocytosis
4144	100513172	ssc-miR-1343	VPS36	Endocytosis
4144	100523947	ssc-miR-1343	LOC100523947	Endocytosis
4144	396665	ssc-miR-1343	TGFBR1	Endocytosis
4144	397311	ssc-miR-1343	KDR	Endocytosis
4144	396810	hsa-miR-200c-5p	KIT	Endocytosis
4144	100511767	bta-mir-2887-2-p5	ARAP1	Endocytosis
4144	100513350	bta-mir-2887-2-p5	LOC100513350	Endocytosis
4144	100519354	bta-mir-2887-2-p5	RUFY1	Endocytosis
4144	100157936	rno-mir-3553-p5	LOC100157936	Endocytosis
4144	100523862	rno-mir-3553-p5	RAB5C	Endocytosis
4144	100153403	hsa-miR-26b-3p	EEA1	Endocytosis
4144	100516729	hsa-miR-26b-3p	STAMBP	Endocytosis
4144	397114	hsa-miR-26b-3p	GRK7	Endocytosis
4144	100125375	ssc-miR-126-5p	CAV2	Endocytosis
4144	100153403	ssc-miR-769-5p_R+1	EEA1	Endocytosis
4144	100155580	ssc-miR-769-5p_R+1	LOC100155580	Endocytosis
4144	100513395	ssc-miR-769-5p_R+1	ARFGAP2	Endocytosis
4144	100145888	eca-miR-507_L+2R-1_1ss16AT	SMAP2	Endocytosis
4144	100154662	eca-miR-507_L+2R-1_1ss16AT	LOC100154662	Endocytosis
4144	100523947	eca-miR-507_L+2R-1_1ss16AT	LOC100523947	Endocytosis
4144	100152937	ssc-miR-140-5p_L+1	GRK5	Endocytosis
4144	100153403	ssc-miR-140-5p_L+1	EEA1	Endocytosis
4144	100155580	ssc-miR-140-5p_L+1	LOC100155580	Endocytosis
4144	100518076	ssc-miR-140-5p_L+1	EPS15	Endocytosis
4144	397062	ssc-miR-140-5p_L+1	TFRC	Endocytosis
4144	100152937	ssc-miR-30a-5p_R+2	GRK5	Endocytosis
4144	100153403	ssc-miR-30a-5p_R+2	EEA1	Endocytosis
4144	100155580	ssc-miR-30a-5p_R+2	LOC100155580	Endocytosis
4144	100513326	ssc-miR-30a-5p_R+2	SMAP1	Endocytosis
4144	100516729	ssc-miR-30a-5p_R+2	STAMBP	Endocytosis
4144	100520250	ssc-miR-30a-5p_R+2	AP2A1	Endocytosis
4144	100522530	ssc-miR-30a-5p_R+2	SH3KBP1	Endocytosis
4144	397062	ssc-miR-30a-5p_R+2	TFRC	Endocytosis
4144	100155580	bta-miR-21-3p_L+1R-1	LOC100155580	Endocytosis
4144	100271929	bta-miR-21-3p_L+1R-1	CLTC	Endocytosis
4144	100519354	bta-miR-21-3p_L+1R-1	RUFY1	Endocytosis
4144	100520250	bta-miR-21-3p_L+1R-1	AP2A1	Endocytosis
4144	100523962	bta-miR-21-3p_L+1R-1	LOC100523962	Endocytosis
4144	396810	bta-miR-21-3p_L+1R-1	KIT	Endocytosis
4144	397062	bta-miR-21-3p_L+1R-1	TFRC	Endocytosis
4144	100154662	bta-miR-200b_R+1	LOC100154662	Endocytosis
4144	100523947	bta-miR-200b_R+1	LOC100523947	Endocytosis
4144	397311	bta-miR-200b_R+1	KDR	Endocytosis
4144	100154457	mmu-let-7a-2-3p_R+1	TM2D2	Endocytosis
4144	100154662	mmu-let-7a-2-3p_R+1	LOC100154662	Endocytosis
4144	100155445	mmu-let-7a-2-3p_R+1	LOC100155445	Endocytosis
4144	100155580	mmu-let-7a-2-3p_R+1	LOC100155580	Endocytosis
4144	100513782	mmu-let-7a-2-3p_R+1	RAB11B	Endocytosis
4144	100522249	mmu-let-7a-2-3p_R+1	LOC100522249	Endocytosis
4144	396659	mmu-let-7a-2-3p_R+1	CXCR4	Endocytosis
4144	100157936	cgr-miR-29c-5p	LOC100157936	Endocytosis
4144	100513842	ssc-miR-744	ADRBK1	Endocytosis
4144	100520058	ssc-miR-744	IQSEC2	Endocytosis
4144	100523947	ssc-miR-744	LOC100523947	Endocytosis
4144	100524443	ssc-miR-744	ACAP3	Endocytosis
4144	100524645	ssc-miR-744	RAB11FIP4	Endocytosis
4144	100518076	bta-mir-216b-p3_1ss13TC	EPS15	Endocytosis
4144	100157936	ssc-miR-4334-3p	LOC100157936	Endocytosis
4144	100513842	ssc-miR-4334-3p	ADRBK1	Endocytosis
4144	100520250	ssc-miR-4334-3p	AP2A1	Endocytosis
4144	100523962	ssc-miR-4334-3p	LOC100523962	Endocytosis
4144	100513350	mmu-mir-1983-p5_1ss1GA	LOC100513350	Endocytosis
4144	100518076	mmu-mir-1983-p5_1ss1GA	EPS15	Endocytosis
4144	397311	mmu-mir-1983-p5_1ss1GA	KDR	Endocytosis
4144	404693	mmu-mir-1983-p5_1ss1GA	CAV1	Endocytosis
4144	780428	mmu-mir-1983-p5_1ss1GA	CDC42	Endocytosis
4144	100125375	ssc-miR-545-3p_R+1	CAV2	Endocytosis
4144	100155445	ssc-miR-545-3p_R+1	LOC100155445	Endocytosis
4144	100155580	ssc-miR-545-3p_R+1	LOC100155580	Endocytosis
4144	100513122	ssc-miR-545-3p_R+1	VPS37A	Endocytosis
4144	100516729	ssc-miR-545-3p_R+1	STAMBP	Endocytosis
4144	100518076	ssc-miR-545-3p_R+1	EPS15	Endocytosis
4144	100125375	hsa-miR-3065-5p	CAV2	Endocytosis
4144	100154192	hsa-miR-3065-5p	LOC100154192	Endocytosis
4144	100155445	hsa-miR-3065-5p	LOC100155445	Endocytosis
4144	100513842	hsa-miR-3065-5p	ADRBK1	Endocytosis
4144	100516729	hsa-miR-3065-5p	STAMBP	Endocytosis
4144	100518076	hsa-miR-3065-5p	EPS15	Endocytosis
4144	397260	hsa-miR-3065-5p	SMAD3	Endocytosis
4144	100125375	ssc-miR-106a_R-1_1ss1AC	CAV2	Endocytosis
4144	100125967	ssc-miR-106a_R-1_1ss1AC	LDLRAP1	Endocytosis
4144	100153403	ssc-miR-106a_R-1_1ss1AC	EEA1	Endocytosis
4144	100154192	ssc-miR-106a_R-1_1ss1AC	LOC100154192	Endocytosis
4144	100517164	ssc-miR-106a_R-1_1ss1AC	ZFYVE9	Endocytosis
4144	100520058	ssc-miR-106a_R-1_1ss1AC	IQSEC2	Endocytosis
4144	100521564	ssc-miR-106a_R-1_1ss1AC	ARAP2	Endocytosis
4144	100524238	ssc-miR-106a_R-1_1ss1AC	LOC100524238	Endocytosis
4144	100154457	ssc-miR-2320-5p_R+1	TM2D2	Endocytosis
4144	100157936	ssc-miR-2320-5p_R+1	LOC100157936	Endocytosis
4144	100513395	ssc-miR-2320-5p_R+1	ARFGAP2	Endocytosis
4144	100522530	ssc-miR-2320-5p_R+1	SH3KBP1	Endocytosis
4144	100523962	ssc-miR-2320-5p_R+1	LOC100523962	Endocytosis
4144	100125375	ssc-miR-29b	CAV2	Endocytosis
4144	100513035	ssc-miR-29b	CHMP5	Endocytosis
4144	100513172	ssc-miR-29b	VPS36	Endocytosis
4144	100513326	ssc-miR-29b	SMAP1	Endocytosis
4144	100516729	ssc-miR-29b	STAMBP	Endocytosis
4144	100518076	ssc-miR-29b	EPS15	Endocytosis
4144	780428	ssc-miR-29b	CDC42	Endocytosis
4144	100125967	ssc-miR-339-3p	LDLRAP1	Endocytosis
4144	100145888	ssc-miR-339-3p	SMAP2	Endocytosis
4144	100511744	ssc-miR-339-3p	ARAP3	Endocytosis
4144	100516729	ssc-miR-339-3p	STAMBP	Endocytosis
4144	100520058	ssc-miR-339-3p	IQSEC2	Endocytosis
4144	100520250	ssc-miR-339-3p	AP2A1	Endocytosis
4144	406190	ssc-miR-339-3p	DNAJC6	Endocytosis
4144	100155445	ssc-miR-127	LOC100155445	Endocytosis
4144	100156344	eca-mir-1842-p3	SH3GLB2	Endocytosis
4144	100511767	eca-mir-1842-p3	ARAP1	Endocytosis
4144	100512857	eca-mir-1842-p3	LOC100512857	Endocytosis
4144	100513350	eca-mir-1842-p3	LOC100513350	Endocytosis
4144	100513842	eca-mir-1842-p3	ADRBK1	Endocytosis
4144	100519354	eca-mir-1842-p3	RUFY1	Endocytosis
4144	397260	eca-mir-1842-p3	SMAD3	Endocytosis
4144	397311	eca-mir-1842-p3	KDR	Endocytosis
4144	414900	eca-mir-1842-p3	PLD2	Endocytosis
4144	100513842	ssc-miR-181c	ADRBK1	Endocytosis
4144	100518076	ssc-miR-181c	EPS15	Endocytosis
4144	100521564	ssc-miR-181c	ARAP2	Endocytosis
4144	404693	ssc-miR-181c	CAV1	Endocytosis
4144	100125375	hsa-miR-127-5p	CAV2	Endocytosis
4144	100518076	hsa-miR-127-5p	EPS15	Endocytosis
4144	100521362	hsa-miR-127-5p	PIP5K1C	Endocytosis
4144	397062	hsa-miR-127-5p	TFRC	Endocytosis
4144	397260	hsa-miR-127-5p	SMAD3	Endocytosis
4144	100155445	ssc-miR-320_R-1	LOC100155445	Endocytosis
4144	100513172	ssc-miR-320_R-1	VPS36	Endocytosis
4144	100513326	ssc-miR-320_R-1	SMAP1	Endocytosis
4144	100518076	ssc-miR-320_R-1	EPS15	Endocytosis
4144	397062	ssc-miR-320_R-1	TFRC	Endocytosis
4144	100154192	ssc-miR-148b-5p	LOC100154192	Endocytosis
4144	100154662	ssc-miR-148b-5p	LOC100154662	Endocytosis
4144	100518076	ssc-miR-148b-5p	EPS15	Endocytosis
4144	100519354	ssc-miR-148b-5p	RUFY1	Endocytosis
4144	396659	ssc-miR-148b-5p	CXCR4	Endocytosis
4144	397062	ssc-miR-148b-5p	TFRC	Endocytosis
4144	406190	ssc-miR-148b-5p	DNAJC6	Endocytosis
4144	100037293	ssc-miR-532-3p	SLA-1	Endocytosis
4144	100511744	ssc-miR-532-3p	ARAP3	Endocytosis
4144	100512857	ssc-miR-532-3p	LOC100512857	Endocytosis
4144	100517164	ssc-miR-532-3p	ZFYVE9	Endocytosis
4144	100152937	ssc-miR-331-3p_R-1	GRK5	Endocytosis
4144	100154457	ssc-miR-331-3p_R-1	TM2D2	Endocytosis
4144	100511767	ssc-miR-331-3p_R-1	ARAP1	Endocytosis
4144	100513842	ssc-miR-331-3p_R-1	ADRBK1	Endocytosis
4144	100516729	ssc-miR-331-3p_R-1	STAMBP	Endocytosis
4144	100517164	ssc-miR-331-3p_R-1	ZFYVE9	Endocytosis
4144	100520250	ssc-miR-331-3p_R-1	AP2A1	Endocytosis
4144	100521141	ssc-miR-331-3p_R-1	ARRB1	Endocytosis
4144	100523271	ssc-miR-331-3p_R-1	STAM	Endocytosis
4144	100523947	ssc-miR-331-3p_R-1	LOC100523947	Endocytosis
4144	100523962	ssc-miR-331-3p_R-1	LOC100523962	Endocytosis
4144	100524645	ssc-miR-331-3p_R-1	RAB11FIP4	Endocytosis
4144	100125967	ssc-mir-29b-2-p5	LDLRAP1	Endocytosis
4144	100153403	ssc-mir-29b-2-p5	EEA1	Endocytosis
4144	100155580	ssc-mir-29b-2-p5	LOC100155580	Endocytosis
4144	100513326	ssc-mir-29b-2-p5	SMAP1	Endocytosis
4144	100521564	ssc-mir-29b-2-p5	ARAP2	Endocytosis
4144	396659	ssc-mir-29b-2-p5	CXCR4	Endocytosis
4144	100154662	ssc-miR-149	LOC100154662	Endocytosis
4144	100155445	ssc-miR-149	LOC100155445	Endocytosis
4144	100511744	ssc-miR-149	ARAP3	Endocytosis
4144	100523962	ssc-miR-149	LOC100523962	Endocytosis
4144	396810	ssc-miR-149	KIT	Endocytosis
4144	397062	ssc-miR-149	TFRC	Endocytosis
4144	397311	ssc-miR-149	KDR	Endocytosis
4144	100155445	ssc-miR-361-5p	LOC100155445	Endocytosis
4144	397078	ssc-miR-361-5p	TGFB1	Endocytosis
4144	100154662	hsa-miR-574-5p	LOC100154662	Endocytosis
4144	100519354	hsa-miR-574-5p	RUFY1	Endocytosis
4144	100521564	hsa-miR-574-5p	ARAP2	Endocytosis
4144	100523947	hsa-miR-574-5p	LOC100523947	Endocytosis
4144	100145888	ssc-mir-4332-p5_1ss19CA	SMAP2	Endocytosis
4144	100316852	ssc-mir-4332-p5_1ss19CA	SH3GLB1	Endocytosis
4144	100513035	ssc-mir-4332-p5_1ss19CA	CHMP5	Endocytosis
4144	100513326	ssc-mir-4332-p5_1ss19CA	SMAP1	Endocytosis
4144	100513395	ssc-mir-4332-p5_1ss19CA	ARFGAP2	Endocytosis
4144	100513782	ssc-mir-4332-p5_1ss19CA	RAB11B	Endocytosis
4144	100516729	ssc-mir-4332-p5_1ss19CA	STAMBP	Endocytosis
4144	100520058	ssc-mir-4332-p5_1ss19CA	IQSEC2	Endocytosis
4144	100520250	ssc-mir-4332-p5_1ss19CA	AP2A1	Endocytosis
4144	100522530	ssc-mir-4332-p5_1ss19CA	SH3KBP1	Endocytosis
4144	100523862	ssc-mir-4332-p5_1ss19CA	RAB5C	Endocytosis
4144	100523947	ssc-mir-4332-p5_1ss19CA	LOC100523947	Endocytosis
4144	100524443	ssc-mir-4332-p5_1ss19CA	ACAP3	Endocytosis
4144	397114	ssc-mir-4332-p5_1ss19CA	GRK7	Endocytosis
4144	780428	ssc-mir-4332-p5_1ss19CA	CDC42	Endocytosis
4144	100154662	ssc-miR-324	LOC100154662	Endocytosis
4144	100157936	ssc-miR-324	LOC100157936	Endocytosis
4144	100513395	ssc-miR-324	ARFGAP2	Endocytosis
4144	100518076	ssc-miR-324	EPS15	Endocytosis
4144	100154192	ssc-mir-1285-p5	LOC100154192	Endocytosis
4144	100518076	ssc-mir-1285-p5	EPS15	Endocytosis
4144	397062	ssc-mir-1285-p5	TFRC	Endocytosis
4144	100153403	ssc-let-7f	EEA1	Endocytosis
4144	100524645	ssc-let-7f	RAB11FIP4	Endocytosis
4144	396665	ssc-let-7f	TGFBR1	Endocytosis
4144	100513122	ssc-miR-92a	VPS37A	Endocytosis
4144	100153403	hsa-miR-186-3p_L-1R+1	EEA1	Endocytosis
4144	100154662	hsa-miR-186-3p_L-1R+1	LOC100154662	Endocytosis
4144	100513350	hsa-miR-186-3p_L-1R+1	LOC100513350	Endocytosis
4144	100513782	hsa-miR-186-3p_L-1R+1	RAB11B	Endocytosis
4144	100516044	hsa-miR-186-3p_L-1R+1	CHMP2B	Endocytosis
4144	100516729	hsa-miR-186-3p_L-1R+1	STAMBP	Endocytosis
4144	100523947	hsa-miR-186-3p_L-1R+1	LOC100523947	Endocytosis
4144	100523962	hsa-miR-186-3p_L-1R+1	LOC100523962	Endocytosis
4144	396659	hsa-miR-186-3p_L-1R+1	CXCR4	Endocytosis
4144	100145888	ssc-miR-491	SMAP2	Endocytosis
4144	100153403	ssc-miR-491	EEA1	Endocytosis
4144	100154859	ssc-miR-491	VPS28	Endocytosis
4144	100155445	ssc-miR-491	LOC100155445	Endocytosis
4144	100511767	ssc-miR-491	ARAP1	Endocytosis
4144	100519354	ssc-miR-491	RUFY1	Endocytosis
4144	100520058	ssc-miR-491	IQSEC2	Endocytosis
4144	100523947	ssc-miR-491	LOC100523947	Endocytosis
4144	397260	ssc-miR-491	SMAD3	Endocytosis
4144	780428	ssc-miR-491	CDC42	Endocytosis
4144	100125967	ssc-miR-381	LDLRAP1	Endocytosis
4144	100152937	ssc-miR-381	GRK5	Endocytosis
4144	100519668	ssc-miR-381	GRK4	Endocytosis
4144	100520058	ssc-miR-381	IQSEC2	Endocytosis
4144	100155445	eca-miR-1842_1ss9TC	LOC100155445	Endocytosis
4144	100511744	eca-miR-1842_1ss9TC	ARAP3	Endocytosis
4144	100513172	eca-miR-1842_1ss9TC	VPS36	Endocytosis
4144	100518076	eca-miR-1842_1ss9TC	EPS15	Endocytosis
4144	100519354	eca-miR-1842_1ss9TC	RUFY1	Endocytosis
4144	100522530	eca-miR-1842_1ss9TC	SH3KBP1	Endocytosis
4144	100524443	eca-miR-1842_1ss9TC	ACAP3	Endocytosis
4144	100524645	eca-miR-1842_1ss9TC	RAB11FIP4	Endocytosis
4144	100153403	ssc-mir-4331-p3	EEA1	Endocytosis
4144	100521564	ssc-mir-4331-p3	ARAP2	Endocytosis
4144	396665	ssc-mir-4331-p3	TGFBR1	Endocytosis
4144	780428	ssc-mir-4331-p3	CDC42	Endocytosis
4144	100145888	mmu-miR-20a-3p_R+1_1ss10CT	SMAP2	Endocytosis
4144	100153403	mmu-miR-20a-3p_R+1_1ss10CT	EEA1	Endocytosis
4144	100154662	mmu-miR-20a-3p_R+1_1ss10CT	LOC100154662	Endocytosis
4144	397062	mmu-miR-20a-3p_R+1_1ss10CT	TFRC	Endocytosis
4144	100153403	cfa-miR-200b	EEA1	Endocytosis
4144	100521564	cfa-miR-200b	ARAP2	Endocytosis
4144	100125967	ssc-miR-376a-5p_R-1	LDLRAP1	Endocytosis
4144	100157936	ssc-miR-376a-5p_R-1	LOC100157936	Endocytosis
4144	100135037	cfa-miR-505_R+1	SLA-6	Endocytosis
4144	100145888	cfa-miR-505_R+1	SMAP2	Endocytosis
4144	100154457	cfa-miR-505_R+1	TM2D2	Endocytosis
4144	100154471	cfa-miR-505_R+1	NTRK1	Endocytosis
4144	100155445	cfa-miR-505_R+1	LOC100155445	Endocytosis
4144	100511767	cfa-miR-505_R+1	ARAP1	Endocytosis
4144	100512857	cfa-miR-505_R+1	LOC100512857	Endocytosis
4144	396810	cfa-miR-505_R+1	KIT	Endocytosis
4144	397311	cfa-miR-505_R+1	KDR	Endocytosis
4144	414900	cfa-miR-505_R+1	PLD2	Endocytosis
4144	100152937	ssc-miR-497	GRK5	Endocytosis
4144	100153403	ssc-miR-497	EEA1	Endocytosis
4144	100155580	ssc-miR-497	LOC100155580	Endocytosis
4144	100520250	ssc-miR-497	AP2A1	Endocytosis
4144	100521362	ssc-miR-497	PIP5K1C	Endocytosis
4144	397260	ssc-miR-497	SMAD3	Endocytosis
4144	397311	ssc-miR-497	KDR	Endocytosis
4144	100153403	ssc-miR-191	EEA1	Endocytosis
4144	100154662	ssc-miR-191	LOC100154662	Endocytosis
4144	100513326	ssc-miR-139-5p_R+1	SMAP1	Endocytosis
4144	100516729	ssc-miR-139-5p_R+1	STAMBP	Endocytosis
4144	100518076	ssc-miR-139-5p_R+1	EPS15	Endocytosis
4144	100521564	ssc-miR-139-5p_R+1	ARAP2	Endocytosis
4144	396659	ssc-miR-139-5p_R+1	CXCR4	Endocytosis
4144	397400	ssc-miR-139-5p_R+1	TGFB3	Endocytosis
4144	100125375	bta-mir-2404-1-p3_1ss20CG	CAV2	Endocytosis
4144	100154192	bta-mir-2404-1-p3_1ss20CG	LOC100154192	Endocytosis
4144	100157660	bta-mir-2404-1-p3_1ss20CG	SH3GL3	Endocytosis
4144	100316852	bta-mir-2404-1-p3_1ss20CG	SH3GLB1	Endocytosis
4144	100513035	bta-mir-2404-1-p3_1ss20CG	CHMP5	Endocytosis
4144	100513122	bta-mir-2404-1-p3_1ss20CG	VPS37A	Endocytosis
4144	100513172	bta-mir-2404-1-p3_1ss20CG	VPS36	Endocytosis
4144	100516729	bta-mir-2404-1-p3_1ss20CG	STAMBP	Endocytosis
4144	100521564	bta-mir-2404-1-p3_1ss20CG	ARAP2	Endocytosis
4144	100153403	ssc-let-7e	EEA1	Endocytosis
4144	100524645	ssc-let-7e	RAB11FIP4	Endocytosis
4144	396665	ssc-let-7e	TGFBR1	Endocytosis
4144	100135036	hsa-mir-6087-p5_1ss13TC	SLA-8	Endocytosis
4144	397156	hsa-mir-6087-p5_1ss13TC	IL2RG	Endocytosis
4144	100125967	ssc-miR-296-3p_R+1	LDLRAP1	Endocytosis
4144	100154662	ssc-miR-296-3p_R+1	LOC100154662	Endocytosis
4144	100522530	ssc-miR-296-3p_R+1	SH3KBP1	Endocytosis
4144	397260	ssc-miR-296-3p_R+1	SMAD3	Endocytosis
4144	100125967	ssc-miR-30b-3p_R+1	LDLRAP1	Endocytosis
4144	100145888	ssc-miR-30b-3p_R+1	SMAP2	Endocytosis
4144	100154192	ssc-miR-30b-3p_R+1	LOC100154192	Endocytosis
4144	100155580	ssc-miR-30b-3p_R+1	LOC100155580	Endocytosis
4144	100513350	ssc-miR-30b-3p_R+1	LOC100513350	Endocytosis
4144	100516729	ssc-miR-30b-3p_R+1	STAMBP	Endocytosis
4144	100519354	ssc-miR-30b-3p_R+1	RUFY1	Endocytosis
4144	100523947	ssc-miR-30b-3p_R+1	LOC100523947	Endocytosis
4144	100523962	ssc-miR-30b-3p_R+1	LOC100523962	Endocytosis
4144	397260	ssc-miR-30b-3p_R+1	SMAD3	Endocytosis
4144	404693	bta-miR-652_R+1	CAV1	Endocytosis
4144	100125375	ssc-miR-301_1ss5CG	CAV2	Endocytosis
4144	100154192	ssc-miR-301_1ss5CG	LOC100154192	Endocytosis
4144	100154662	ssc-miR-301_1ss5CG	LOC100154662	Endocytosis
4144	100271929	ssc-miR-301_1ss5CG	CLTC	Endocytosis
4144	100513122	ssc-miR-301_1ss5CG	VPS37A	Endocytosis
4144	100518076	ssc-miR-301_1ss5CG	EPS15	Endocytosis
4144	100521564	ssc-miR-301_1ss5CG	ARAP2	Endocytosis
4144	100522249	ssc-miR-301_1ss5CG	LOC100522249	Endocytosis
4144	396659	ssc-miR-301_1ss5CG	CXCR4	Endocytosis
4144	397062	ssc-miR-301_1ss5CG	TFRC	Endocytosis
4144	100154662	ssc-miR-429	LOC100154662	Endocytosis
4144	397311	ssc-miR-429	KDR	Endocytosis
4144	100155580	ssc-miR-31	LOC100155580	Endocytosis
4144	100516729	ssc-miR-31	STAMBP	Endocytosis
4144	100520058	ssc-miR-31	IQSEC2	Endocytosis
4144	100523947	ssc-miR-31	LOC100523947	Endocytosis
4144	396810	ssc-miR-31	KIT	Endocytosis
4144	397062	ssc-miR-31	TFRC	Endocytosis
4144	100145888	ssc-miR-138	SMAP2	Endocytosis
4144	100154662	ssc-miR-138	LOC100154662	Endocytosis
4144	100154859	ssc-miR-138	VPS28	Endocytosis
4144	100155580	ssc-miR-138	LOC100155580	Endocytosis
4144	100157936	ssc-miR-138	LOC100157936	Endocytosis
4144	100516729	ssc-miR-138	STAMBP	Endocytosis
4144	100523947	ssc-miR-138	LOC100523947	Endocytosis
4144	397260	ssc-miR-138	SMAD3	Endocytosis
4144	404693	ssc-miR-138	CAV1	Endocytosis
4144	100271929	ssc-miR-1271_L+2R-2	CLTC	Endocytosis
4144	100513035	ssc-miR-1271_L+2R-2	CHMP5	Endocytosis
4144	100516044	ssc-miR-1271_L+2R-2	CHMP2B	Endocytosis
4144	397078	ssc-miR-1271_L+2R-2	TGFB1	Endocytosis
4144	100153403	ssc-miR-21_R+1	EEA1	Endocytosis
4144	100154662	ssc-miR-21_R+1	LOC100154662	Endocytosis
4144	100125967	hsa-miR-378a-5p	LDLRAP1	Endocytosis
4144	100513782	hsa-miR-378a-5p	RAB11B	Endocytosis
4144	100516729	hsa-miR-378a-5p	STAMBP	Endocytosis
4144	100157936	cgr-miR-18a-3p	LOC100157936	Endocytosis
4144	100513326	cgr-miR-18a-3p	SMAP1	Endocytosis
4144	100517164	cgr-miR-18a-3p	ZFYVE9	Endocytosis
4144	100521564	cgr-miR-18a-3p	ARAP2	Endocytosis
4144	100522530	cgr-miR-18a-3p	SH3KBP1	Endocytosis
4144	100523947	cgr-miR-18a-3p	LOC100523947	Endocytosis
4144	396810	cgr-miR-18a-3p	KIT	Endocytosis
4144	397400	cgr-miR-18a-3p	TGFB3	Endocytosis
4144	414900	cgr-miR-18a-3p	PLD2	Endocytosis
4144	100152937	ssc-miR-143-5p_R+1	GRK5	Endocytosis
4144	100154192	ssc-miR-143-5p_R+1	LOC100154192	Endocytosis
4144	100519354	ssc-miR-143-5p_R+1	RUFY1	Endocytosis
4144	397311	ssc-miR-143-5p_R+1	KDR	Endocytosis
4144	100125375	ssc-miR-362_R-1	CAV2	Endocytosis
4144	100516729	ssc-miR-362_R-1	STAMBP	Endocytosis
4144	100524238	ssc-miR-362_R-1	LOC100524238	Endocytosis
4144	397311	ssc-miR-362_R-1	KDR	Endocytosis
4144	100153403	bta-miR-34b_R+1	EEA1	Endocytosis
4144	100154662	bta-miR-34b_R+1	LOC100154662	Endocytosis
4144	100519354	bta-miR-34b_R+1	RUFY1	Endocytosis
4144	397062	bta-miR-34b_R+1	TFRC	Endocytosis
4144	397400	bta-miR-34b_R+1	TGFB3	Endocytosis
4144	100153403	ssc-miR-98	EEA1	Endocytosis
4144	100524645	ssc-miR-98	RAB11FIP4	Endocytosis
4144	396665	ssc-miR-98	TGFBR1	Endocytosis
4144	100125375	ssc-miR-152	CAV2	Endocytosis
4144	100513350	ssc-miR-152	LOC100513350	Endocytosis
4144	100518076	ssc-miR-152	EPS15	Endocytosis
4144	396810	ssc-miR-152	KIT	Endocytosis
4144	100145888	ssc-miR-505_L+1	SMAP2	Endocytosis
4144	100154192	ssc-miR-505_L+1	LOC100154192	Endocytosis
4144	396659	ssc-miR-505_L+1	CXCR4	Endocytosis
4144	397311	ssc-miR-505_L+1	KDR	Endocytosis
4144	780428	ssc-miR-505_L+1	CDC42	Endocytosis
4144	100154192	bta-mir-2904-3-p3	LOC100154192	Endocytosis
4144	100511744	bta-mir-2904-3-p3	ARAP3	Endocytosis
4144	100152937	ssc-miR-24-3p	GRK5	Endocytosis
4144	100154192	ssc-miR-24-3p	LOC100154192	Endocytosis
4144	100154457	ssc-miR-24-3p	TM2D2	Endocytosis
4144	100513395	ssc-miR-24-3p	ARFGAP2	Endocytosis
4144	100516729	ssc-miR-24-3p	STAMBP	Endocytosis
4144	100518076	ssc-miR-24-3p	EPS15	Endocytosis
4144	100519354	ssc-miR-24-3p	RUFY1	Endocytosis
4144	100521564	ssc-miR-24-3p	ARAP2	Endocytosis
4144	100523862	ssc-miR-24-3p	RAB5C	Endocytosis
4144	100523947	ssc-miR-24-3p	LOC100523947	Endocytosis
4144	397311	ssc-miR-24-3p	KDR	Endocytosis
4144	100125967	ssc-miR-423-3p	LDLRAP1	Endocytosis
4144	100513782	ssc-miR-423-3p	RAB11B	Endocytosis
4144	100145888	ssc-miR-7	SMAP2	Endocytosis
4144	100154662	ssc-miR-7	LOC100154662	Endocytosis
4144	100520058	ssc-miR-7	IQSEC2	Endocytosis
4144	100521141	ssc-miR-7	ARRB1	Endocytosis
4144	397062	ssc-miR-7	TFRC	Endocytosis
4144	397114	ssc-miR-7	GRK7	Endocytosis
4144	397311	ssc-miR-7	KDR	Endocytosis
4144	404693	ssc-miR-7	CAV1	Endocytosis
4144	100152937	bta-miR-2904_L+3R+3	GRK5	Endocytosis
4144	100154859	bta-miR-2904_L+3R+3	VPS28	Endocytosis
4144	100513782	bta-miR-2904_L+3R+3	RAB11B	Endocytosis
4144	100520058	bta-miR-2904_L+3R+3	IQSEC2	Endocytosis
4144	100523862	bta-miR-2904_L+3R+3	RAB5C	Endocytosis
4144	397260	bta-miR-2904_L+3R+3	SMAD3	Endocytosis
4144	100125375	ssc-miR-17-5p	CAV2	Endocytosis
4144	100125967	ssc-miR-17-5p	LDLRAP1	Endocytosis
4144	100153403	ssc-miR-17-5p	EEA1	Endocytosis
4144	100154192	ssc-miR-17-5p	LOC100154192	Endocytosis
4144	100517164	ssc-miR-17-5p	ZFYVE9	Endocytosis
4144	100520058	ssc-miR-17-5p	IQSEC2	Endocytosis
4144	100521564	ssc-miR-17-5p	ARAP2	Endocytosis
4144	100524238	ssc-miR-17-5p	LOC100524238	Endocytosis
4144	100135037	ssc-miR-140-3p_R-1	SLA-6	Endocytosis
4144	100153403	ssc-miR-140-3p_R-1	EEA1	Endocytosis
4144	100154662	ssc-miR-140-3p_R-1	LOC100154662	Endocytosis
4144	100514408	ssc-miR-140-3p_R-1	AP2S1	Endocytosis
4144	100516729	ssc-miR-140-3p_R-1	STAMBP	Endocytosis
4144	397078	ssc-miR-140-3p_R-1	TGFB1	Endocytosis
4144	397260	ssc-miR-140-3p_R-1	SMAD3	Endocytosis
4144	100524443	ssc-miR-542-5p_R+2	ACAP3	Endocytosis
4144	100145888	bta-miR-26b	SMAP2	Endocytosis
4144	100154192	bta-miR-26b	LOC100154192	Endocytosis
4144	100513842	bta-miR-26b	ADRBK1	Endocytosis
4144	100518076	bta-miR-26b	EPS15	Endocytosis
4144	100523862	bta-miR-26b	RAB5C	Endocytosis
4144	100153403	cfa-miR-33a_R+1	EEA1	Endocytosis
4144	100154662	cfa-miR-33a_R+1	LOC100154662	Endocytosis
4144	100513350	cfa-miR-33a_R+1	LOC100513350	Endocytosis
4144	100519354	cfa-miR-33a_R+1	RUFY1	Endocytosis
4144	100520058	cfa-miR-33a_R+1	IQSEC2	Endocytosis
4144	100154457	ssc-miR-345-3p_L-1R+1	TM2D2	Endocytosis
4144	100154662	ssc-miR-345-3p_L-1R+1	LOC100154662	Endocytosis
4144	100154192	bta-miR-346	LOC100154192	Endocytosis
4144	100511767	bta-miR-346	ARAP1	Endocytosis
4144	100513842	bta-miR-346	ADRBK1	Endocytosis
4144	100523947	bta-miR-346	LOC100523947	Endocytosis
4144	397260	bta-miR-346	SMAD3	Endocytosis
4144	100125375	ssc-miR-340	CAV2	Endocytosis
4144	100511744	ssc-miR-340	ARAP3	Endocytosis
4144	100513172	ssc-miR-340	VPS36	Endocytosis
4144	100516044	ssc-miR-340	CHMP2B	Endocytosis
4144	100518076	ssc-miR-340	EPS15	Endocytosis
4144	100522530	ssc-miR-340	SH3KBP1	Endocytosis
4144	397311	ssc-miR-340	KDR	Endocytosis
4144	100125967	cgr-miR-29a-5p_R-2	LDLRAP1	Endocytosis
4144	100157936	cgr-miR-29a-5p_R-2	LOC100157936	Endocytosis
4144	100521564	cgr-miR-29a-5p_R-2	ARAP2	Endocytosis
4144	397062	cgr-miR-29a-5p_R-2	TFRC	Endocytosis
4144	397260	cgr-miR-29a-5p_R-2	SMAD3	Endocytosis
4144	100145888	ssc-miR-17-3p_R+1	SMAP2	Endocytosis
4144	100154457	ssc-miR-17-3p_R+1	TM2D2	Endocytosis
4144	100513172	ssc-miR-17-3p_R+1	VPS36	Endocytosis
4144	100154662	ssc-miR-493-3p	LOC100154662	Endocytosis
4144	100513326	ssc-miR-493-3p	SMAP1	Endocytosis
4144	100519354	ssc-miR-493-3p	RUFY1	Endocytosis
4144	100513350	ssc-miR-2320-3p_R+1	LOC100513350	Endocytosis
4144	100521564	ssc-miR-2320-3p_R+1	ARAP2	Endocytosis
4144	396810	ssc-miR-2320-3p_R+1	KIT	Endocytosis
4144	100037288	bta-mir-6529-p3	SLA-3	Endocytosis
4144	100154662	bta-mir-6529-p3	LOC100154662	Endocytosis
4144	100155580	bta-mir-6529-p3	LOC100155580	Endocytosis
4144	100157936	bta-mir-6529-p3	LOC100157936	Endocytosis
4144	100513035	bta-mir-6529-p3	CHMP5	Endocytosis
4144	100513172	bta-mir-6529-p3	VPS36	Endocytosis
4144	100516044	bta-mir-6529-p3	CHMP2B	Endocytosis
4144	100522530	bta-mir-6529-p3	SH3KBP1	Endocytosis
4144	100523947	bta-mir-6529-p3	LOC100523947	Endocytosis
4144	100037288	ssc-miR-19a	SLA-3	Endocytosis
4144	100154192	ssc-miR-19a	LOC100154192	Endocytosis
4144	100271929	ssc-miR-19a	CLTC	Endocytosis
4144	100513122	ssc-miR-19a	VPS37A	Endocytosis
4144	100522530	ssc-miR-19a	SH3KBP1	Endocytosis
4144	396648	ssc-miR-19a	HSP70.2	Endocytosis
4144	100155580	hsa-miR-191-3p_R-1_2ss6GA19CT	LOC100155580	Endocytosis
4144	100513122	hsa-miR-191-3p_R-1_2ss6GA19CT	VPS37A	Endocytosis
4144	100516044	hsa-miR-191-3p_R-1_2ss6GA19CT	CHMP2B	Endocytosis
4144	100521564	hsa-miR-191-3p_R-1_2ss6GA19CT	ARAP2	Endocytosis
4144	397062	hsa-miR-191-3p_R-1_2ss6GA19CT	TFRC	Endocytosis
4144	100154192	ssc-miR-148a-5p	LOC100154192	Endocytosis
4144	100518076	ssc-miR-148a-5p	EPS15	Endocytosis
4144	100519354	ssc-miR-148a-5p	RUFY1	Endocytosis
4144	397062	ssc-miR-148a-5p	TFRC	Endocytosis
4144	406190	ssc-miR-148a-5p	DNAJC6	Endocytosis
4144	100518076	ssc-miR-671-5p	EPS15	Endocytosis
4144	397260	ssc-miR-671-5p	SMAD3	Endocytosis
4144	100152937	ssc-miR-15a_R+3	GRK5	Endocytosis
4144	100153403	ssc-miR-15a_R+3	EEA1	Endocytosis
4144	100155580	ssc-miR-15a_R+3	LOC100155580	Endocytosis
4144	100520250	ssc-miR-15a_R+3	AP2A1	Endocytosis
4144	100521362	ssc-miR-15a_R+3	PIP5K1C	Endocytosis
4144	397260	ssc-miR-15a_R+3	SMAD3	Endocytosis
4144	397311	ssc-miR-15a_R+3	KDR	Endocytosis
4144	100145888	ssc-miR-210	SMAP2	Endocytosis
4144	100125967	eca-miR-324-3p_L-2R+1	LDLRAP1	Endocytosis
4144	100152937	eca-miR-324-3p_L-2R+1	GRK5	Endocytosis
4144	100511744	eca-miR-324-3p_L-2R+1	ARAP3	Endocytosis
4144	100512857	eca-miR-324-3p_L-2R+1	LOC100512857	Endocytosis
4144	100513326	eca-miR-324-3p_L-2R+1	SMAP1	Endocytosis
4144	100513395	eca-miR-324-3p_L-2R+1	ARFGAP2	Endocytosis
4144	100520250	eca-miR-324-3p_L-2R+1	AP2A1	Endocytosis
4144	100523862	eca-miR-324-3p_L-2R+1	RAB5C	Endocytosis
4144	100523947	eca-miR-324-3p_L-2R+1	LOC100523947	Endocytosis
4144	100524443	eca-miR-324-3p_L-2R+1	ACAP3	Endocytosis
4144	100513122	ssc-miR-425-3p_L+1R-1	VPS37A	Endocytosis
4144	100513350	mmu-mir-703-p5	LOC100513350	Endocytosis
4144	397062	mmu-mir-703-p5	TFRC	Endocytosis
4144	414900	mmu-mir-703-p5	PLD2	Endocytosis
4144	780428	mmu-mir-703-p5	CDC42	Endocytosis
4144	100152937	ssc-miR-30c-5p_R+1	GRK5	Endocytosis
4144	100153403	ssc-miR-30c-5p_R+1	EEA1	Endocytosis
4144	100155580	ssc-miR-30c-5p_R+1	LOC100155580	Endocytosis
4144	100513326	ssc-miR-30c-5p_R+1	SMAP1	Endocytosis
4144	100520250	ssc-miR-30c-5p_R+1	AP2A1	Endocytosis
4144	397062	ssc-miR-30c-5p_R+1	TFRC	Endocytosis
4144	100145888	sha-mir-716a-p5_1ss11TC	SMAP2	Endocytosis
4144	100154192	sha-mir-716a-p5_1ss11TC	LOC100154192	Endocytosis
4144	100513395	sha-mir-716a-p5_1ss11TC	ARFGAP2	Endocytosis
4144	100125375	ssc-miR-545-5p_R+1	CAV2	Endocytosis
4144	100153403	ssc-miR-545-5p_R+1	EEA1	Endocytosis
4144	100154457	ssc-miR-545-5p_R+1	TM2D2	Endocytosis
4144	100513172	ssc-miR-545-5p_R+1	VPS36	Endocytosis
4144	397062	ssc-miR-545-5p_R+1	TFRC	Endocytosis
4144	404693	ssc-miR-545-5p_R+1	CAV1	Endocytosis
4144	100511767	ssc-miR-885-3p	ARAP1	Endocytosis
4144	100513842	ssc-miR-885-3p	ADRBK1	Endocytosis
4144	100520058	ssc-miR-885-3p	IQSEC2	Endocytosis
4144	100524443	ssc-miR-885-3p	ACAP3	Endocytosis
4144	397078	ssc-miR-885-3p	TGFB1	Endocytosis
4144	397260	ssc-miR-885-3p	SMAD3	Endocytosis
4144	100513395	oar-miR-377-5p_1ss11TC	ARFGAP2	Endocytosis
4144	100125375	ssc-miR-181b_R-1	CAV2	Endocytosis
4144	100513842	ssc-miR-181b_R-1	ADRBK1	Endocytosis
4144	100521564	ssc-miR-181b_R-1	ARAP2	Endocytosis
4144	404693	ssc-miR-181b_R-1	CAV1	Endocytosis
4144	100125967	ssc-miR-326_R+1	LDLRAP1	Endocytosis
4144	100154662	ssc-miR-326_R+1	LOC100154662	Endocytosis
4144	100511744	ssc-miR-326_R+1	ARAP3	Endocytosis
4144	100513172	ssc-miR-326_R+1	VPS36	Endocytosis
4144	100519354	ssc-miR-326_R+1	RUFY1	Endocytosis
4360	100525324	ssc-miR-339	L1CAM	Axon guidance
4360	100155631	ssc-miR-103	LOC100155631	Axon guidance
4360	100523324	ssc-miR-103	ARHGEF12	Axon guidance
4360	100154469	ssc-miR-92b-5p	NFATC4	Axon guidance
4360	100153225	ssc-let-7a	SEMA3F	Axon guidance
4360	100156359	ssc-let-7a	LIMK2	Axon guidance
4360	100519013	ssc-let-7a	LOC100519013	Axon guidance
4360	733587	ssc-let-7a	LOC733587	Axon guidance
4360	100512275	ssc-miR-34c	SEMA4F	Axon guidance
4360	100517028	ssc-miR-34c	EPHB4	Axon guidance
4360	100525766	ssc-miR-34c	LOC100525766	Axon guidance
4360	100152257	ssc-miR-202-5p_1ss16TC	NTNG2	Axon guidance
4360	100154343	ssc-miR-202-5p_1ss16TC	ABLIM1	Axon guidance
4360	397019	ssc-miR-202-5p_1ss16TC	ITGB1	Axon guidance
4360	397445	ssc-miR-142-3p	ROCK2	Axon guidance
4360	497233	ssc-miR-142-3p	CFL2	Axon guidance
4360	100135672	hsa-miR-1307-5p	EFNB3	Axon guidance
4360	100516554	ssc-miR-20b	LOC100516554	Axon guidance
4360	100517028	ssc-miR-20b	EPHB4	Axon guidance
4360	100519013	ssc-miR-20b	LOC100519013	Axon guidance
4360	497233	ssc-miR-20b	CFL2	Axon guidance
4360	100519013	bta-miR-660_1ss20CT	LOC100519013	Axon guidance
4360	100523324	bta-miR-660_1ss20CT	ARHGEF12	Axon guidance
4360	100519013	ssc-miR-186	LOC100519013	Axon guidance
4360	780428	ssc-miR-186	CDC42	Axon guidance
4360	100135672	ssc-miR-29a_L-1R-1	EFNB3	Axon guidance
4360	100519013	ssc-miR-29a_L-1R-1	LOC100519013	Axon guidance
4360	397019	ssc-miR-29a_L-1R-1	ITGB1	Axon guidance
4360	780428	ssc-miR-29a_L-1R-1	CDC42	Axon guidance
4360	100152257	ssc-miR-628	NTNG2	Axon guidance
4360	100152598	ssc-miR-628	SEMA4D	Axon guidance
4360	100525766	ssc-miR-628	LOC100525766	Axon guidance
4360	397445	eca-miR-500	ROCK2	Axon guidance
4360	100134969	ssc-mir-4339-p3_1ss22GT	NFATC2	Axon guidance
4360	100135672	ssc-mir-4339-p3_1ss22GT	EFNB3	Axon guidance
4360	100144501	ssc-mir-4339-p3_1ss22GT	EFNA1	Axon guidance
4360	100152257	ssc-mir-4339-p3_1ss22GT	NTNG2	Axon guidance
4360	100522008	ssc-mir-4339-p3_1ss22GT	SEMA6A	Axon guidance
4360	100525766	ssc-mir-4339-p3_1ss22GT	LOC100525766	Axon guidance
4360	397523	ssc-mir-4339-p3_1ss22GT	GNAI2	Axon guidance
4360	100144501	ssc-miR-423-5p	EFNA1	Axon guidance
4360	100517028	ssc-miR-423-5p	EPHB4	Axon guidance
4360	100518378	ssc-miR-423-5p	EPHA8	Axon guidance
4360	100522873	ssc-miR-423-5p	LOC100522873	Axon guidance
4360	780428	ssc-miR-423-5p	CDC42	Axon guidance
4360	100513444	eca-miR-338-5p_R-1	SLIT3	Axon guidance
4360	100134969	ssc-miR-185	NFATC2	Axon guidance
4360	100135672	ssc-miR-185	EFNB3	Axon guidance
4360	100144501	ssc-miR-185	EFNA1	Axon guidance
4360	100516554	ssc-miR-185	LOC100516554	Axon guidance
4360	100517028	ssc-miR-185	EPHB4	Axon guidance
4360	100519013	ssc-miR-185	LOC100519013	Axon guidance
4360	100519549	ssc-miR-185	EPHB2	Axon guidance
4360	100524544	ssc-miR-185	ABL1	Axon guidance
4360	396659	ssc-miR-185	CXCR4	Axon guidance
4360	780428	ssc-miR-185	CDC42	Axon guidance
4360	100519013	ssc-miR-769-3p_L-1	LOC100519013	Axon guidance
4360	100153225	ssc-miR-193a-3p	SEMA3F	Axon guidance
4360	100512275	ssc-miR-193a-3p	SEMA4F	Axon guidance
4360	100522873	ssc-miR-193a-3p	LOC100522873	Axon guidance
4360	100523324	ssc-miR-193a-3p	ARHGEF12	Axon guidance
4360	100152257	ssc-miR-135	NTNG2	Axon guidance
4360	100156359	ssc-miR-135	LIMK2	Axon guidance
4360	100517994	ssc-miR-135	RGS3	Axon guidance
4360	100523324	ssc-miR-135	ARHGEF12	Axon guidance
4360	397445	ssc-miR-135	ROCK2	Axon guidance
4360	100153225	ssc-let-7g	SEMA3F	Axon guidance
4360	100156359	ssc-let-7g	LIMK2	Axon guidance
4360	100519013	ssc-let-7g	LOC100519013	Axon guidance
4360	100525766	ssc-let-7g	LOC100525766	Axon guidance
4360	733587	ssc-let-7g	LOC733587	Axon guidance
4360	780428	ssc-miR-499-5p	CDC42	Axon guidance
4360	100152257	ssc-miR-30d	NTNG2	Axon guidance
4360	100519549	ssc-miR-30d	EPHB2	Axon guidance
4360	100524544	ssc-miR-30d	ABL1	Axon guidance
4360	397019	ssc-miR-30d	ITGB1	Axon guidance
4360	397523	ssc-miR-30d	GNAI2	Axon guidance
4360	497233	ssc-miR-30d	CFL2	Axon guidance
4360	100519013	ssc-miR-885-5p	LOC100519013	Axon guidance
4360	100518378	ssc-miR-338_R+1	EPHA8	Axon guidance
4360	100522008	ssc-miR-338_R+1	SEMA6A	Axon guidance
4360	396659	ssc-miR-338_R+1	CXCR4	Axon guidance
4360	733600	ssc-miR-338_R+1	UNC5B	Axon guidance
4360	100134969	hsa-mir-6087-p3	NFATC2	Axon guidance
4360	100152598	hsa-mir-6087-p3	SEMA4D	Axon guidance
4360	100153225	hsa-mir-6087-p3	SEMA3F	Axon guidance
4360	100519549	hsa-mir-6087-p3	EPHB2	Axon guidance
4360	100134969	cgr-miR-19b-5p	NFATC2	Axon guidance
4360	100516554	cgr-miR-19b-5p	LOC100516554	Axon guidance
4360	100519013	cgr-miR-19b-5p	LOC100519013	Axon guidance
4360	100522008	cgr-miR-19b-5p	SEMA6A	Axon guidance
4360	100524544	cgr-miR-19b-5p	ABL1	Axon guidance
4360	497233	cgr-miR-19b-5p	CFL2	Axon guidance
4360	100126852	ssc-miR-26a	GSK3B	Axon guidance
4360	100516554	ssc-miR-26a	LOC100516554	Axon guidance
4360	100522873	ssc-miR-26a	LOC100522873	Axon guidance
4360	100525766	ssc-miR-26a	LOC100525766	Axon guidance
4360	396603	ssc-miR-26a	PPP3CB	Axon guidance
4360	497233	ssc-miR-26a	CFL2	Axon guidance
4360	100153927	bta-miR-2404_R+8	MAPK1	Axon guidance
4360	100523324	ssc-mir-4338-p3	ARHGEF12	Axon guidance
4360	100523324	ssc-miR-18a_R+1	ARHGEF12	Axon guidance
4360	780428	ssc-miR-18a_R+1	CDC42	Axon guidance
4360	100152598	ssc-miR-490-3p_R+1	SEMA4D	Axon guidance
4360	100519549	ssc-miR-490-3p_R+1	EPHB2	Axon guidance
4360	100152257	hsa-miR-103a-2-5p	NTNG2	Axon guidance
4360	100156359	hsa-miR-103a-2-5p	LIMK2	Axon guidance
4360	100519013	hsa-miR-103a-2-5p	LOC100519013	Axon guidance
4360	100523324	hsa-miR-103a-2-5p	ARHGEF12	Axon guidance
4360	100525766	hsa-miR-103a-2-5p	LOC100525766	Axon guidance
4360	396603	hsa-miR-103a-2-5p	PPP3CB	Axon guidance
4360	397523	hsa-miR-103a-2-5p	GNAI2	Axon guidance
4360	497233	hsa-miR-103a-2-5p	CFL2	Axon guidance
4360	733587	hsa-miR-103a-2-5p	LOC733587	Axon guidance
4360	780428	hsa-miR-103a-2-5p	CDC42	Axon guidance
4360	100134969	ssc-miR-20a_R+2	NFATC2	Axon guidance
4360	100516554	ssc-miR-20a_R+2	LOC100516554	Axon guidance
4360	100517028	ssc-miR-20a_R+2	EPHB4	Axon guidance
4360	100519013	ssc-miR-20a_R+2	LOC100519013	Axon guidance
4360	397445	ssc-miR-20a_R+2	ROCK2	Axon guidance
4360	497233	ssc-miR-20a_R+2	CFL2	Axon guidance
4360	733600	ssc-miR-1296-5p	UNC5B	Axon guidance
4360	100152257	ssc-miR-181a_R-1	NTNG2	Axon guidance
4360	100153200	ssc-miR-181a_R-1	SEMA3B	Axon guidance
4360	497233	ssc-miR-181a_R-1	CFL2	Axon guidance
4360	100512275	bta-miR-677_R+4_1ss13CT	SEMA4F	Axon guidance
4360	397445	bta-miR-677_R+4_1ss13CT	ROCK2	Axon guidance
4360	497233	bta-miR-677_R+4_1ss13CT	CFL2	Axon guidance
4360	497233	ssc-miR-19b	CFL2	Axon guidance
4360	100135672	ssc-miR-29c_R-1	EFNB3	Axon guidance
4360	100519013	ssc-miR-29c_R-1	LOC100519013	Axon guidance
4360	397019	ssc-miR-29c_R-1	ITGB1	Axon guidance
4360	780428	ssc-miR-29c_R-1	CDC42	Axon guidance
4360	100134969	sha-mir-716a-p3_1ss5TC	NFATC2	Axon guidance
4360	100154343	sha-mir-716a-p3_1ss5TC	ABLIM1	Axon guidance
4360	100518378	sha-mir-716a-p3_1ss5TC	EPHA8	Axon guidance
4360	397445	sha-mir-716a-p3_1ss5TC	ROCK2	Axon guidance
4360	497233	sha-mir-716a-p3_1ss5TC	CFL2	Axon guidance
4360	780428	sha-mir-716a-p3_1ss5TC	CDC42	Axon guidance
4360	100134969	ssc-miR-193a-5p	NFATC2	Axon guidance
4360	100517028	ssc-miR-193a-5p	EPHB4	Axon guidance
4360	100135672	ssc-miR-1306-5p	EFNB3	Axon guidance
4360	100144501	ssc-miR-1306-5p	EFNA1	Axon guidance
4360	100153200	ssc-miR-1306-5p	SEMA3B	Axon guidance
4360	100522873	ssc-miR-1306-5p	LOC100522873	Axon guidance
4360	100523324	ssc-miR-1306-5p	ARHGEF12	Axon guidance
4360	100135672	bta-miR-200c	EFNB3	Axon guidance
4360	100153225	bta-miR-200c	SEMA3F	Axon guidance
4360	397445	bta-miR-200c	ROCK2	Axon guidance
4360	497233	bta-miR-200c	CFL2	Axon guidance
4360	100135672	ssc-miR-151-5p	EFNB3	Axon guidance
4360	100155631	ssc-miR-107_R-2	LOC100155631	Axon guidance
4360	100523324	ssc-miR-107_R-2	ARHGEF12	Axon guidance
4360	100512275	bta-mir-2887-2-p3_1ss24CT	SEMA4F	Axon guidance
4360	100525324	bta-mir-2887-2-p3_1ss24CT	L1CAM	Axon guidance
4360	100523324	ssc-miR-190a_R+2	ARHGEF12	Axon guidance
4360	100519013	ssc-miR-365-3p	LOC100519013	Axon guidance
4360	100525766	ssc-miR-365-3p	LOC100525766	Axon guidance
4360	100523324	ssc-miR-148b-3p	ARHGEF12	Axon guidance
4360	100524544	ssc-miR-148b-3p	ABL1	Axon guidance
4360	100525766	ssc-miR-148b-3p	LOC100525766	Axon guidance
4360	497233	ssc-miR-148b-3p	CFL2	Axon guidance
4360	733587	ssc-miR-148b-3p	LOC733587	Axon guidance
4360	100135672	ssc-miR-671-3p	EFNB3	Axon guidance
4360	100144501	ssc-miR-615	EFNA1	Axon guidance
4360	100152598	ssc-miR-615	SEMA4D	Axon guidance
4360	100523324	hsa-miR-183-3p_L-1R+1	ARHGEF12	Axon guidance
4360	100153225	bta-miR-340	SEMA3F	Axon guidance
4360	397019	bta-miR-340	ITGB1	Axon guidance
4360	100134969	mmu-mir-5105-p5	NFATC2	Axon guidance
4360	100152257	mmu-mir-5105-p5	NTNG2	Axon guidance
4360	100517028	mmu-mir-5105-p5	EPHB4	Axon guidance
4360	100524544	mmu-mir-5105-p5	ABL1	Axon guidance
4360	100519013	eca-miR-590-3p	LOC100519013	Axon guidance
4360	100151958	bta-miR-188_R-4	TMEM39A	Axon guidance
4360	100519013	bta-miR-188_R-4	LOC100519013	Axon guidance
4360	100523324	ssc-miR-101_R+1	ARHGEF12	Axon guidance
4360	397019	ssc-miR-101_R+1	ITGB1	Axon guidance
4360	397445	ssc-miR-101_R+1	ROCK2	Axon guidance
4360	100134969	hsa-miR-185-3p_R-1	NFATC2	Axon guidance
4360	100152257	hsa-miR-185-3p_R-1	NTNG2	Axon guidance
4360	100517028	hsa-miR-185-3p_R-1	EPHB4	Axon guidance
4360	100518378	hsa-miR-185-3p_R-1	EPHA8	Axon guidance
4360	100525324	hsa-miR-185-3p_R-1	L1CAM	Axon guidance
4360	396603	hsa-miR-185-3p_R-1	PPP3CB	Axon guidance
4360	397523	hsa-miR-185-3p_R-1	GNAI2	Axon guidance
4360	733600	hsa-miR-185-3p_R-1	UNC5B	Axon guidance
4360	396603	ssc-miR-136_R-1	PPP3CB	Axon guidance
4360	100519013	oar-miR-485-3p	LOC100519013	Axon guidance
4360	100152257	mmu-miR-30f_L+1R-1_1ss17AG	NTNG2	Axon guidance
4360	100519013	mmu-miR-30f_L+1R-1_1ss17AG	LOC100519013	Axon guidance
4360	100519549	mmu-miR-30f_L+1R-1_1ss17AG	EPHB2	Axon guidance
4360	100524544	mmu-miR-30f_L+1R-1_1ss17AG	ABL1	Axon guidance
4360	397019	mmu-miR-30f_L+1R-1_1ss17AG	ITGB1	Axon guidance
4360	397523	mmu-miR-30f_L+1R-1_1ss17AG	GNAI2	Axon guidance
4360	497233	mmu-miR-30f_L+1R-1_1ss17AG	CFL2	Axon guidance
4360	100524544	ssc-mir-99b-p3	ABL1	Axon guidance
4360	100153225	ssc-let-7c	SEMA3F	Axon guidance
4360	100156359	ssc-let-7c	LIMK2	Axon guidance
4360	100519013	ssc-let-7c	LOC100519013	Axon guidance
4360	733587	ssc-let-7c	LOC733587	Axon guidance
4360	100152257	ssc-miR-30e-5p	NTNG2	Axon guidance
4360	100519549	ssc-miR-30e-5p	EPHB2	Axon guidance
[truncated: 54,111 more rows]
